# Supplementary material for: Transcriptome sequencing reveals high isoform diversity in the ant Formica exsecta
Source: PeerJ. 2017 Nov 21;5:e3998. doi: 10.7717/peerj.3998 (PMC5701548; doi:10.7717/peerj.3998)
Supplement: File S3 [file peerj-05-3998-s003.xlsx]

## Sheet: Male_Specific_Final-TA
Table S3_A) list of Male specific gene from Final-TA assembly.
C. floridanus Gene ID	C. floridanus Gene Length	Final-TA ID	Final-TA Length	Alignment Length	Identity	E-Value	Protein Coverage	TA Coverage	NCBI ID	Description of Annotation	#GO	GO IDs	GO Names	Enzyme Codes	Enzyme Names	Sperm Proteome of the Honeybee (Zareie et al., 2013)
Cflo_00046--NP_001035315.1_APIME	146	kmr25_comp44882_c0_seq1	519	109	0.881	2.5552e-64	0.75	0.63	EFN69322	Pheromone-binding protein-related protein 3 [Camponotus floridanus]	1	F:GO:0005549	F:odorant binding			#N/A
Cflo_00057--NA	159	kmr23_comp67344_c1_seq1	337	32	1	8.22586e-15	0.2	0.29	EFN69333	hypothetical protein EAG_01073 [Camponotus floridanus]						#N/A
Cflo_00257--XP_001123055.1_APIME	554	kmr23_comp9789_c0_seq1	233	75	0.827	1.14597e-36	0.14	0.97	EFN73019	Probable glutamate receptor [Camponotus floridanus]	5	P:GO:0034220; C:GO:0016021; P:GO:0035235; F:GO:0004970; F:GO:0005234	P:ion transmembrane transport; C:integral component of membrane; P:ionotropic glutamate receptor signaling pathway; F:ionotropic glutamate receptor activity; F:extracellular-glutamate-gated ion channel activity			#N/A
Cflo_00392--XP_396471.3_APIME	392	kmr27_comp89309_c3_seq3	1171	351	0.895	0	0.9	0.9	EFN64815	Potassium/sodium hyperpolarization-activated cyclic nucleotide-gated channel 4 [Camponotus floridanus]	1	C:GO:0016021	C:integral component of membrane			#N/A
Cflo_00417--XP_001120717.1_APIME	601	kmr23_comp50550_c1_seq1	2775	600	0.852	0	1	0.69	EFN64839	Putative adenylate kinase 7 [Camponotus floridanus]	5	F:GO:0004017; F:GO:0004127; F:GO:0005524; P:GO:0016310; P:GO:0006139	F:adenylate kinase activity; F:cytidylate kinase activity; F:ATP binding; P:phosphorylation; P:nucleobase-containing compound metabolic process	EC:2.7.4.3; EC:2.7.4.14	Adenylate kinase; UMP/CMP kinase	#N/A
Cflo_00418--XP_001602700.1_NASVI	148	kmr27_comp90269_c0_seq3	1931	126	0.873	2.62643e-56	0.85	0.2	EFN64840	Putative adenylate kinase 7 [Camponotus floridanus]	6	F:GO:0004017; F:GO:0004127; F:GO:0005524; C:GO:0016021; P:GO:0016310; P:GO:0006139	F:adenylate kinase activity; F:cytidylate kinase activity; F:ATP binding; C:integral component of membrane; P:phosphorylation; P:nucleobase-containing compound metabolic process	EC:2.7.4.3; EC:2.7.4.14	Adenylate kinase; UMP/CMP kinase	#N/A
Cflo_00484--NA	193	kmr23_comp64996_c0_seq1	852	98	0.714	5.45228e-37	0.51	0.36	EFN73620	hypothetical protein EAG_08417 [Camponotus floridanus]						#N/A
Cflo_00490--XP_396339.3_APIME	561	kmr27_comp86006_c0_seq1	3610	537	0.94	0	0.96	0.45	EFN73626	A disintegrin and metalloproteinase with thrombospondin motifs 7 [Camponotus floridanus]	5	F:GO:0008270; P:GO:0007229; P:GO:0006508; F:GO:0004222; C:GO:0005578	F:zinc ion binding; P:integrin-mediated signaling pathway; P:proteolysis; F:metalloendopeptidase activity; C:proteinaceous extracellular matrix	EC:3.4.24	Acting on peptide bonds (peptidases)	XP_396339.4:- PREDICTED: A disintegrin and metalloproteinase with thrombospondin motifs 16-like [Apis mellifera]
Cflo_00491--XP_396339.3_APIME	607	kmr27_comp86006_c0_seq2	1995	607	0.908	0	1	0.91	EFN73627	A disintegrin and metalloproteinase with thrombospondin motifs 7 [Camponotus floridanus]	5	F:GO:0008270; P:GO:0007229; P:GO:0006508; F:GO:0004222; C:GO:0005578	F:zinc ion binding; P:integrin-mediated signaling pathway; P:proteolysis; F:metalloendopeptidase activity; C:proteinaceous extracellular matrix	EC:3.4.24	Acting on peptide bonds (peptidases)	XP_396339.4:- PREDICTED: A disintegrin and metalloproteinase with thrombospondin motifs 16-like [Apis mellifera]
Cflo_00492--XP_001120225.1_APIME	1115	kmr23_comp82476_c0_seq1	3444	863	0.917	0	0.77	0.75	EFN73628	A disintegrin and metalloproteinase with thrombospondin motifs 7 [Camponotus floridanus]	5	F:GO:0008270; P:GO:0007229; P:GO:0006508; F:GO:0004222; C:GO:0005578	F:zinc ion binding; P:integrin-mediated signaling pathway; P:proteolysis; F:metalloendopeptidase activity; C:proteinaceous extracellular matrix	EC:3.4.24	Acting on peptide bonds (peptidases)	XP_396339.4:- PREDICTED: A disintegrin and metalloproteinase with thrombospondin motifs 16-like [Apis mellifera]
Cflo_00622--XP_392933.2_APIME	477	kmr23_comp71586_c0_seq1	2101	473	0.77	0	0.99	0.71	XP_003487103	PREDICTED: heat shock 70 kDa protein cognate 4-like [Bombus impatiens]						NP_001153522.1:- heat shock protein cognate 4 [Apis mellifera]
Cflo_00627--NA	903	kmr23_comp133146_c0_seq1	265	41	0.902	1.07859e-14	0.05	0.47	EFN71043	hypothetical protein EAG_09934 [Camponotus floridanus]						#N/A
Cflo_00632--NA	109	kmr25_comp77742_c2_seq2	525	53	0.887	4.74181e-23	0.49	0.3	EFN71048	hypothetical protein EAG_09939 [Camponotus floridanus]						#N/A
Cflo_00818--XP_001120432.1_APIME	40	kmr25_comp38712_c0_seq2	461	38	0.895	3.45612e-17	0.95	0.25	EFN67209	Cytochrome c [Camponotus floridanus]	6	F:GO:0046872; F:GO:0009055; C:GO:0005739; P:GO:0055114; C:GO:0070469; F:GO:0020037	F:metal ion binding; F:electron carrier activity; C:mitochondrion; P:oxidation-reduction process; C:respiratory chain; F:heme binding			XP_001120432.1:- PREDICTED: cytochrome c, testis-specific-like [Apis mellifera]
Cflo_00827--XP_001120432.1_APIME	98	kmr25_comp38712_c0_seq2	461	97	0.753	7.53237e-45	0.99	0.67	EFN67212	Cytochrome c [Camponotus floridanus]	6	F:GO:0046872; F:GO:0009055; C:GO:0005739; P:GO:0055114; C:GO:0070469; F:GO:0020037	F:metal ion binding; F:electron carrier activity; C:mitochondrion; P:oxidation-reduction process; C:respiratory chain; F:heme binding			XP_001120432.1:- PREDICTED: cytochrome c, testis-specific-like [Apis mellifera]
Cflo_00843--NA	364	kmr23_comp53630_c2_seq1	470	28	0.893	9.37792e-09	0.08	0.18	EFN67232	hypothetical protein EAG_09106 [Camponotus floridanus]						#N/A
Cflo_00919--XP_001121605.1_APIME	938	kmr23_comp71722_c0_seq1	5176	926	0.796	0	0.99	0.54	EFN67581	hypothetical protein EAG_16263 [Camponotus floridanus]						XP_003251496.1:- PREDICTED: hypothetical protein LOC100577730 [Apis mellifera]
Cflo_00959--XP_623966.1_APIME	277	kmr29_comp87836_c2_seq1	738	126	0.913	1.13457e-76	0.45	0.51	EFN68221	Neuromedin-U receptor 2 [Camponotus floridanus]	3	P:GO:0007218; C:GO:0016021; F:GO:0001607	P:neuropeptide signaling pathway; C:integral component of membrane; F:neuromedin U receptor activity			#N/A
Cflo_01351--BGIBMGA012471-PA_BOMMO	413	kmr23_comp151926_c0_seq1	291	45	0.933	7.52816e-24	0.11	0.46	EFN65687	hypothetical protein EAG_10944 [Camponotus floridanus]	1	C:GO:0016021	C:integral component of membrane			#N/A
Cflo_01387--XP_392300.3_APIME	661	kmr25_comp85078_c0_seq1	3101	570	0.868	0	0.86	1	EFN71081	Protein dachsous [Camponotus floridanus]	4	F:GO:0005509; C:GO:0016021; P:GO:0007156; C:GO:0005886	F:calcium ion binding; C:integral component of membrane; P:homophilic cell adhesion via plasma membrane adhesion molecules; C:plasma membrane			#N/A
Cflo_01414--XP_001120286.1_APIME	587	kmr23_comp29112_c0_seq1	997	294	0.905	8.87119e-170	0.5	0.89	EFN71107	Sodium/potassium/calcium exchanger 6 [Camponotus floridanus]	2	P:GO:0055085; C:GO:0016021	P:transmembrane transport; C:integral component of membrane			#N/A
Cflo_01688--XP_625038.1_APIME	163	kmr23_comp75650_c0_seq1	1848	162	0.784	3.15363e-79	0.99	0.27	EFN61926	Putative OPA3-like protein CG13603 [Camponotus floridanus]						#N/A
Cflo_01756--XP_397207.2_APIME	984	kmr27_comp89792_c2_seq7	3426	984	0.914	0	1	0.86	EFN73789	2-oxoglutarate dehydrogenase E1 component, mitochondrial [Camponotus floridanus]	3	F:GO:0030976; F:GO:0004591; P:GO:0006099	F:thiamine pyrophosphate binding; F:oxoglutarate dehydrogenase (succinyl-transferring) activity; P:tricarboxylic acid cycle	EC:1.2.4.2	Oxoglutarate dehydrogenase (succinyl-transferring)	XP_397207.2:- PREDICTED: 2-oxoglutarate dehydrogenase, mitochondrial-like [Apis mellifera]
Cflo_01808--XP_001603606.1_NASVI	214	kmr27_comp85601_c1_seq2	373	107	0.832	7.32741e-60	0.5	0.86	EFN73841	Quinone oxidoreductase-like protein 2 [Camponotus floridanus]	3	F:GO:0008270; F:GO:0016491; P:GO:0055114	F:zinc ion binding; F:oxidoreductase activity; P:oxidation-reduction process			#N/A
Cflo_02068--XP_624072.1_APIME	388	kmr25_comp73084_c2_seq1	487	111	0.991	4.98963e-66	0.29	0.69	EFN70374	Glycine receptor subunit alpha-2 [Camponotus floridanus]	4	P:GO:0034220; C:GO:0016021; F:GO:0005230; C:GO:0005886	P:ion transmembrane transport; C:integral component of membrane; F:extracellular ligand-gated ion channel activity; C:plasma membrane			#N/A
Cflo_02220--XP_001122480.1_APIME	76	kmr23_comp67486_c3_seq1	547	76	0.882	4.68006e-44	1	0.42	EFN67875	Radial spoke head 10-like protein B [Camponotus floridanus]						#N/A
Cflo_02390--NA	296	kmr23_comp48873_c0_seq1	2131	56	0.857	2.67663e-19	0.19	0.08	EFN61182	hypothetical protein EAG_12741 [Camponotus floridanus]						#N/A
Cflo_02496--NA	84	kmr29_comp94367_c1_seq3	1438	40	0.7	4.25032e-14	0.48	0.08	EFN73479	hypothetical protein EAG_09496 [Camponotus floridanus]						#N/A
Cflo_02521--XP_393804.3_APIME	2142	kmr25_comp79761_c2_seq1	2933	964	0.857	0	0.45	0.98	EFN73504	Dynein heavy chain 1, axonemal [Camponotus floridanus]	4	F:GO:0016887; F:GO:0003777; C:GO:0005858; P:GO:0003341	F:ATPase activity; F:microtubule motor activity; C:axonemal dynein complex; P:cilium movement	EC:3.6.1.3; EC:3.6.1.15	Adenosinetriphosphatase; Nucleoside-triphosphate phosphatase	XP_624604.3:- PREDICTED: dynein heavy chain 1, axonemal [Apis mellifera]
Cflo_02526--XP_624604.2_APIME	1662	kmr23_comp94861_c0_seq1	1279	337	0.807	0	0.2	0.8	EFN73508	Dynein heavy chain 1, axonemal [Camponotus floridanus]	4	F:GO:0016887; F:GO:0003777; C:GO:0005858; P:GO:0003341	F:ATPase activity; F:microtubule motor activity; C:axonemal dynein complex; P:cilium movement	EC:3.6.1.3; EC:3.6.1.15	Adenosinetriphosphatase; Nucleoside-triphosphate phosphatase	XP_624604.3:- PREDICTED: dynein heavy chain 1, axonemal [Apis mellifera]
Cflo_02830--XP_001120388.1_APIME	1870	kmr29_comp91757_c1_seq1	3221	1133	0.758	0	0.61	0.99	EFN72491	hypothetical protein EAG_13414 [Camponotus floridanus]						#N/A
Cflo_03143--NA	327	kmr23_comp143354_c0_seq1	420	59	0.881	4.72412e-29	0.18	0.42	EFN61502	hypothetical protein EAG_11738 [Camponotus floridanus]						#N/A
Cflo_03236--BGIBMGA000508-PA_BOMMO	73	kmr29_comp96423_c0_seq3	4610	62	0.774	3.71985e-26	0.85	0.04	EFN69261	hypothetical protein EAG_13939 [Camponotus floridanus]						#N/A
Cflo_03237--BGIBMGA000507-PA_BOMMO	154	kmr29_comp96423_c0_seq3	4610	154	0.766	1.2797e-74	1	0.1	EFN69262	Sperm-associated antigen 17 [Camponotus floridanus]						#N/A
Cflo_03254--NA	292	kmr29_comp92874_c0_seq1	1134	212	0.835	1.24801e-128	0.73	0.56	EFN70006	hypothetical protein EAG_14687 [Camponotus floridanus]	4	F:GO:0016717; C:GO:0016021; P:GO:0055114; P:GO:0006633	F:oxidoreductase activity, acting on paired donors, with oxidation of a pair of donors resulting in the reduction of molecular oxygen to two molecules of water; C:integral component of membrane; P:oxidation-reduction process; P:fatty acid biosynthetic process	EC:1.14.19	Acting on paired donors, with incorporation or reduction of molecular oxygen. The oxygen incorporated need not be derived from O(2)	XP_003250059.1:- PREDICTED: uncharacterized protein LOC100578562 [Apis mellifera]
Cflo_03470--XP_394663.3_APIME	422	kmr23_comp60927_c0_seq1	1448	327	0.939	0	0.77	0.68	EFN62193	L-lactate dehydrogenase A-like 6A [Camponotus floridanus]	5	P:GO:0005975; F:GO:0016616; C:GO:0016021; P:GO:0055114; P:GO:0019752	P:carbohydrate metabolic process; F:oxidoreductase activity, acting on the CH-OH group of donors, NAD or NADP as acceptor; C:integral component of membrane; P:oxidation-reduction process; P:carboxylic acid metabolic process			XP_394663.3:- PREDICTED: L-lactate dehydrogenase A-like 6A [Apis mellifera]
Cflo_03508--NA	242	kmr27_comp85503_c0_seq9	1988	182	0.736	2.82673e-51	0.75	0.28	EFN67681	hypothetical protein EAG_03244 [Camponotus floridanus]	2	F:GO:0008270; F:GO:0046872	F:zinc ion binding; F:metal ion binding			#N/A
Cflo_03630--NA	194	kmr23_comp169087_c0_seq1	192	47	1	3.34298e-28	0.24	0.73	EFN62915	hypothetical protein EAG_15808 [Camponotus floridanus]	1	C:GO:0016021	C:integral component of membrane			#N/A
Cflo_03788--XP_001121711.1_APIME	743	kmr23_comp63827_c2_seq1	547	182	0.945	2.94158e-89	0.24	1	EFN64202	Peroxidasin-like protein [Camponotus floridanus]	2	F:GO:0005515; C:GO:0016021	F:protein binding; C:integral component of membrane			XP_395331.4:- PREDICTED: chaoptin [Apis mellifera]
Cflo_03903--XP_001599858.1_NASVI	190	kmr25_comp75737_c0_seq1	1545	188	0.878	2.83447e-120	0.99	0.37	EFN67307	WD repeat-containing protein C10orf79 [Camponotus floridanus]	1	C:GO:0016021	C:integral component of membrane			#N/A
Cflo_03963--XP_001121949.1_APIME	757	kmr23_comp52630_c1_seq1	1399	394	0.886	0	0.52	0.85	EFN65371	Short transient receptor potential channel 5 [Camponotus floridanus]	4	F:GO:0005515; F:GO:0005262; C:GO:0016021; P:GO:0070588	F:protein binding; F:calcium channel activity; C:integral component of membrane; P:calcium ion transmembrane transport			#N/A
Cflo_03973--XP_396659.3_APIME	1930	kmr27_comp91598_c0_seq3	6325	1930	0.907	0	1	0.9	EFN65381	Cadherin-89D [Camponotus floridanus]	4	F:GO:0005509; C:GO:0016021; P:GO:0007156; C:GO:0005886	F:calcium ion binding; C:integral component of membrane; P:homophilic cell adhesion via plasma membrane adhesion molecules; C:plasma membrane			#N/A
Cflo_03988--XP_625267.2_APIME	1584	kmr23_comp66714_c0_seq1	1452	396	0.914	0	0.25	0.91	EFN65395	Low-density lipoprotein receptor [Camponotus floridanus]	3	F:GO:0005515; P:GO:0006508; F:GO:0004252	F:protein binding; P:proteolysis; F:serine-type endopeptidase activity	EC:3.4.21	Acting on peptide bonds (peptidases)	XP_625267.3:- PREDICTED: hypothetical protein LOC551908 isoform 2 [Apis mellifera]
Cflo_03993--XP_394888.3_APIME	403	kmr23_comp68387_c0_seq1	1558	403	0.963	0	1	0.78	EFN65400	WD repeat-containing protein 69 [Camponotus floridanus]	1	F:GO:0005515	F:protein binding			XP_624815.1:- PREDICTED: WD repeat-containing protein 3 [Apis mellifera]
Cflo_04318--NA	176	kmr29_comp87740_c1_seq1	582	24	0.708	3.98923e-06	0.14	0.12	EFN61692	hypothetical protein EAG_12696 [Camponotus floridanus]						#N/A
Cflo_04338--XP_001122095.1_APIME	289	kmr23_comp95997_c0_seq1	816	272	0.783	8.90635e-156	0.94	1	EFN61711	Cationic trypsin-3 [Camponotus floridanus]	2	P:GO:0006508; F:GO:0004252	P:proteolysis; F:serine-type endopeptidase activity	EC:3.4.21	Acting on peptide bonds (peptidases)	#N/A
Cflo_04565--XP_394092.2_APIME	439	kmr25_comp78063_c0_seq1	1592	439	0.852	0	1	0.83	EFN67975	Tubulin alpha chain [Camponotus floridanus]	6	F:GO:0005525; C:GO:0005737; F:GO:0003924; F:GO:0005200; C:GO:0005874; P:GO:0007017	F:GTP binding; C:cytoplasm; F:GTPase activity; F:structural constituent of cytoskeleton; C:microtubule; P:microtubule-based process	EC:3.6.1.15	Nucleoside-triphosphate phosphatase	XP_394092.3:- PREDICTED: tubulin alpha chain-like [Apis mellifera]
Cflo_04606--XP_396683.3_APIME	227	kmr31_comp8143_c0_seq1	3338	227	0.982	2.41001e-148	1	0.23	EFZ20530	hypothetical protein SINV_04557 [Solenopsis invicta]	2	F:GO:0005515; C:GO:0016021	F:protein binding; C:integral component of membrane			XP_395331.4:- PREDICTED: chaoptin [Apis mellifera]
Cflo_04623--XP_396471.3_APIME	442	kmr23_comp66162_c2_seq1	1184	386	0.839	0	0.87	0.92	EFN71680	Potassium/sodium hyperpolarization-activated cyclic nucleotide-gated channel 2 [Camponotus floridanus]	1	C:GO:0016021	C:integral component of membrane			#N/A
Cflo_04683--XP_394100.2_APIME	801	kmr25_comp81485_c0_seq5	2151	567	0.878	0	0.71	0.86	EFN72378	Glutamate receptor delta-2 subunit [Camponotus floridanus]	4	P:GO:0034220; C:GO:0016021; P:GO:0035235; F:GO:0004970	P:ion transmembrane transport; C:integral component of membrane; P:ionotropic glutamate receptor signaling pathway; F:ionotropic glutamate receptor activity			#N/A
Cflo_04766--XP_393804.3_APIME	100	kmr25_comp81901_c0_seq2	1861	100	0.9	1.78178e-56	1	0.16	EFZ12708	hypothetical protein SINV_05112 [Solenopsis invicta]	4	F:GO:0005524; F:GO:0003777; C:GO:0030286; P:GO:0007018	F:ATP binding; F:microtubule motor activity; C:dynein complex; P:microtubule-based movement	EC:3.6.1.15	Nucleoside-triphosphate phosphatase	XP_395692.3:- PREDICTED: LOW QUALITY PROTEIN: dynein heavy chain 3, axonemal [Apis mellifera]
Cflo_04816--XP_623297.1_APIME	281	kmr27_comp90653_c0_seq6	2099	254	0.969	4.21635e-175	0.9	0.36	EFN71417	Uncharacterized protein C21orf59 [Camponotus floridanus]						#N/A
Cflo_04876--XP_393618.3_APIME	981	kmr29_comp94106_c0_seq2	2161	463	0.972	0	0.47	0.65	EFN61006	Maltase 1 [Camponotus floridanus]	2	P:GO:0005975; F:GO:0003824	P:carbohydrate metabolic process; F:catalytic activity			#N/A
Cflo_05076--XP_001122425.1_APIME	275	kmr23_comp68256_c2_seq1	702	223	0.946	2.66997e-151	0.81	0.95	EFN63324	5-hydroxytryptamine receptor 1 [Camponotus floridanus]	3	F:GO:0004930; P:GO:0007186; C:GO:0016021	F:G-protein coupled receptor activity; P:G-protein coupled receptor signaling pathway; C:integral component of membrane			#N/A
Cflo_05124--NP_056017.1_HUMAN	821	kmr23_comp56591_c1_seq1	3047	820	0.856	0	1	0.81	EFN61077	Uncharacterized protein KIAA0556 [Camponotus floridanus]						#N/A
Cflo_05125--NP_056017.1_HUMAN	527	kmr29_comp95861_c1_seq30	1763	527	0.789	0	1	0.94	EFN61077	Uncharacterized protein KIAA0556 [Camponotus floridanus]						#N/A
Cflo_05186--XP_392553.1_APIME	355	kmr23_comp75124_c0_seq1	1546	353	0.7	2.39702e-170	0.99	0.69	EFN63924	Translation initiation factor eIF-2B subunit alpha/beta/delta-like protein [Camponotus floridanus]	7	C:GO:0005634; F:GO:0003743; C:GO:0005737; P:GO:0019284; P:GO:0019509; F:GO:0046523; P:GO:0006413	C:nucleus; F:translation initiation factor activity; C:cytoplasm; P:L-methionine salvage from S-adenosylmethionine; P:L-methionine salvage from methylthioadenosine; F:S-methyl-5-thioribose-1-phosphate isomerase activity; P:translational initiation	EC:5.3.1.23	S-methyl-5-thioribose-1-phosphate isomerase	#N/A
Cflo_05204--NP_892120.2_HUMAN	60	kmr27_comp80212_c0_seq1	2133	59	0.847	1.38632e-30	0.98	0.08	EFN66208	UBX domain-containing protein 5 [Camponotus floridanus]						#N/A
Cflo_05304--XP_394081.2_APIME	88	kmr23_comp37093_c1_seq1	372	81	0.951	4.8086e-52	0.92	0.65	EFN63739	Odorant receptor 47a [Camponotus floridanus]	6	F:GO:0005549; P:GO:0007165; C:GO:0016021; P:GO:0050911; C:GO:0005886; F:GO:0004984	F:odorant binding; P:signal transduction; C:integral component of membrane; P:detection of chemical stimulus involved in sensory perception of smell; C:plasma membrane; F:olfactory receptor activity			#N/A
Cflo_05350--XP_001120111.1_APIME	196	kmr25_comp78620_c10_seq1	1212	132	1	1.3272e-87	0.67	0.33	EFN66593	Short stature homeobox protein 2 [Camponotus floridanus]	3	C:GO:0005634; P:GO:0006355; F:GO:0043565	C:nucleus; P:regulation of transcription, DNA-templated; F:sequence-specific DNA binding			XP_392622.4:- PREDICTED: protein apterous isoform X2 [Apis mellifera]
Cflo_05391--XP_624573.1_APIME	487	kmr23_comp68009_c3_seq1	2212	442	0.91	0	0.91	0.6	EFN69644	Proton-coupled amino acid transporter 4 [Camponotus floridanus]	1	C:GO:0016021	C:integral component of membrane			#N/A
Cflo_05478--XP_001120708.1_APIME	4361	kmr23_comp64319_c0_seq1	2806	935	0.96	0	0.21	1	EFN74803	Dynein heavy chain 8, axonemal [Camponotus floridanus]	5	F:GO:0016887; F:GO:0005524; F:GO:0003777; C:GO:0030286; P:GO:0007018	F:ATPase activity; F:ATP binding; F:microtubule motor activity; C:dynein complex; P:microtubule-based movement	EC:3.6.1.3; EC:3.6.1.15	Adenosinetriphosphatase; Nucleoside-triphosphate phosphatase	XP_001120708.2:- PREDICTED: dynein heavy chain 8, axonemal-like [Apis mellifera]
Cflo_05599--XP_001122039.1_APIME	440	kmr23_comp55927_c1_seq1	186	53	0.868	1.34165e-25	0.12	0.85	EFN71605	hypothetical protein EAG_11594 [Camponotus floridanus]						#N/A
Cflo_05875--XP_001121980.1_APIME	401	kmr27_comp89155_c0_seq3	1313	392	0.89	0	0.98	0.89	EFN60487	Aldose 1-epimerase [Camponotus floridanus]	3	P:GO:0005975; F:GO:0030246; F:GO:0016853	P:carbohydrate metabolic process; F:carbohydrate binding; F:isomerase activity			XP_001121980.2:- PREDICTED: aldose 1-epimerase-like [Apis mellifera]
Cflo_05882--XP_393799.3_APIME	1682	kmr25_comp75956_c1_seq1	1431	478	0.897	0	0.28	1	EFN60493	Fer-1-like protein 4 [Camponotus floridanus]	1	C:GO:0016021	C:integral component of membrane			#N/A
Cflo_05955--NA	54	kmr23_comp137114_c0_seq1	505	29	0.793	1.59803e-08	0.54	0.17	EFN63213	hypothetical protein EAG_15198 [Camponotus floridanus]	4	F:GO:0005549; C:GO:0016021; P:GO:0050911; F:GO:0004984	F:odorant binding; C:integral component of membrane; P:detection of chemical stimulus involved in sensory perception of smell; F:olfactory receptor activity			#N/A
Cflo_06088--NA	106	kmr25_comp83016_c0_seq1	1221	26	0.846	0.000301661	0.25	0.07	EFN69888	hypothetical protein EAG_10850 [Camponotus floridanus]						#N/A
Cflo_06300--NA	517	kmr23_comp126594_c0_seq1	452	149	0.792	2.5858e-78	0.29	1	EFN71157	hypothetical protein EAG_05394 [Camponotus floridanus]						#N/A
Cflo_06333--XP_001120208.1_APIME	380	kmr23_comp3952_c0_seq1	270	89	0.978	5.85464e-53	0.23	0.99	EFN71991	Homeobox protein Nkx-2.6 [Camponotus floridanus]	3	C:GO:0005634; P:GO:0006355; F:GO:0043565	C:nucleus; P:regulation of transcription, DNA-templated; F:sequence-specific DNA binding			#N/A
Cflo_06371--XP_001122517.1_APIME	790	kmr23_comp196038_c0_seq1	178	58	0.914	2.86336e-29	0.07	0.98	EFN63971	Hydrocephalus-inducing protein [Camponotus floridanus]	1	P:GO:0003341	P:cilium movement			#N/A
Cflo_06426--XP_624342.1_APIME	450	kmr23_comp74958_c0_seq1	1688	437	0.902	0	0.97	0.78	EFN61364	Solute carrier family 2, facilitated glucose transporter member 8 [Camponotus floridanus]	4	F:GO:0022891; P:GO:0055085; C:GO:0016021; P:GO:0008643	F:substrate-specific transmembrane transporter activity; P:transmembrane transport; C:integral component of membrane; P:carbohydrate transport			XP_624342.1:- PREDICTED: facilitated trehalose transporter Tret1-like [Apis mellifera]
Cflo_07083--XP_392489.3_APIME	1512	kmr27_comp88937_c1_seq2	3989	1398	0.766	0	0.92	0.75	EFN60246	Protein slit [Camponotus floridanus]	3	F:GO:0005515; F:GO:0005509; C:GO:0005576	F:protein binding; F:calcium ion binding; C:extracellular region			XP_395331.4:- PREDICTED: chaoptin [Apis mellifera]
Cflo_07088--NA	493	kmr23_comp36783_c1_seq1	911	44	0.705	1.00445e-09	0.09	0.15	EFN60251	hypothetical protein EAG_03216 [Camponotus floridanus]						#N/A
Cflo_07519--XP_001122094.1_APIME	314	kmr23_comp77233_c0_seq1	1217	314	0.847	0	1	0.77	EFN68740	Cytochrome c1-2, heme protein, mitochondrial [Camponotus floridanus]	3	F:GO:0009055; C:GO:0016021; F:GO:0020037	F:electron carrier activity; C:integral component of membrane; F:heme binding			#N/A
Cflo_07541--XP_001121599.1_APIME	252	kmr23_comp67299_c6_seq1	1432	239	0.77	1.74969e-110	0.95	0.33	EFN62603	Transcription factor hamlet [Camponotus floridanus]	3	F:GO:0003676; F:GO:0046872; P:GO:0006355	F:nucleic acid binding; F:metal ion binding; P:regulation of transcription, DNA-templated			XP_003249773.1:- PREDICTED: zinc finger protein 714-like [Apis mellifera]
Cflo_07543--NA	405	kmr25_comp83906_c5_seq1	281	59	0.797	1.16964e-22	0.15	0.63	EFN62605	hypothetical protein EAG_03676 [Camponotus floridanus]						#N/A
Cflo_07612--XP_395108.3_APIME	4002	kmr23_comp58641_c1_seq1	2541	802	0.904	0	0.2	0.94	EFN61824	Cytoplasmic dynein 2 heavy chain 1 [Camponotus floridanus]	5	F:GO:0016887; F:GO:0005524; F:GO:0003777; C:GO:0030286; P:GO:0007018	F:ATPase activity; F:ATP binding; F:microtubule motor activity; C:dynein complex; P:microtubule-based movement	EC:3.6.1.3; EC:3.6.1.15	Adenosinetriphosphatase; Nucleoside-triphosphate phosphatase	XP_395108.4:- PREDICTED: cytoplasmic dynein 2 heavy chain 1 [Apis mellifera]
Cflo_07714--XP_392298.3_APIME	123	kmr23_comp131760_c0_seq1	424	83	0.867	1.56319e-26	0.67	0.6	EFN73330	hypothetical protein EAG_05562 [Camponotus floridanus]						#N/A
Cflo_07761--XP_394814.1_APIME	276	kmr27_comp77088_c0_seq2	901	212	0.948	7.31055e-147	0.77	0.71	EFN75031	17-beta hydroxysteroid dehydrogenase 13 [Camponotus floridanus]	3	F:GO:0016491; C:GO:0016021; P:GO:0055114	F:oxidoreductase activity; C:integral component of membrane; P:oxidation-reduction process			XP_624870.2:- PREDICTED: estradiol 17-beta-dehydrogenase 8-like [Apis mellifera]
Cflo_07999--XP_001123170.1_APIME	320	kmr23_comp36946_c0_seq1	1109	286	0.909	0	0.89	0.78	EFN71578	Serine protease snake [Camponotus floridanus]	2	P:GO:0006508; F:GO:0004252	P:proteolysis; F:serine-type endopeptidase activity	EC:3.4.21	Acting on peptide bonds (peptidases)	#N/A
Cflo_08143--XP_623643.2_APIME	1154	kmr23_comp70040_c1_seq1	2320	990	0.71	0	0.86	0.82	EFN73968	26S proteasome non-ATPase regulatory subunit 10 [Camponotus floridanus]	2	F:GO:0005515; C:GO:0000502	F:protein binding; C:proteasome complex			#N/A
Cflo_08180--XP_394052.3_APIME	279	kmr25_comp83068_c1_seq4	3239	184	0.821	4.88202e-99	0.66	0.17	EFN65211	V-set and immunoglobulin domain-containing protein 1 [Camponotus floridanus]						#N/A
Cflo_08193--XP_394832.1_APIME	214	kmr23_comp38107_c0_seq1	1098	214	0.855	4.82728e-138	1	0.58	EFN67641	Elastase-2A [Camponotus floridanus]	2	P:GO:0006508; F:GO:0004252	P:proteolysis; F:serine-type endopeptidase activity	EC:3.4.21	Acting on peptide bonds (peptidases)	#N/A
Cflo_08195--XP_001122110.1_APIME	679	kmr25_comp82453_c1_seq1	1661	512	0.92	0	0.75	0.93	EFN67643	Glycerate kinase [Camponotus floridanus]	2	P:GO:0016310; F:GO:0016301	P:phosphorylation; F:kinase activity			XP_001122110.2:- PREDICTED: glycerate kinase-like [Apis mellifera]
Cflo_08200--XP_001952309.1_ACYPI	231	kmr25_comp38458_c0_seq1	472	34	0.853	2.21636e-11	0.15	0.22	EFN67647	hypothetical protein EAG_11680 [Camponotus floridanus]						#N/A
Cflo_08350--XP_001120052.1_APIME	186	kmr23_comp67645_c0_seq1	1340	185	0.843	6.89464e-112	0.99	0.41	EFN72265	UPF0465 protein C5orf33 [Camponotus floridanus]	3	F:GO:0003951; P:GO:0019674; P:GO:0016310	F:NAD+ kinase activity; P:NAD metabolic process; P:phosphorylation	EC:2.7.1.23	NAD(+) kinase	#N/A
Cflo_08351--XP_001120052.1_APIME	194	kmr27_comp88248_c0_seq4	1209	194	0.784	1.82466e-98	1	0.48	EFN72266	UPF0465 protein C5orf33 [Camponotus floridanus]	4	F:GO:0003951; P:GO:0019674; P:GO:0016310; P:GO:0006741	F:NAD+ kinase activity; P:NAD metabolic process; P:phosphorylation; P:NADP biosynthetic process	EC:2.7.1.23	NAD(+) kinase	#N/A
Cflo_08369--XP_001122516.1_APIME	294	kmr23_comp65665_c0_seq1	573	190	0.742	2.67532e-100	0.65	0.99	EFN69185	Venom allergen 3 [Camponotus floridanus]	1	C:GO:0005576	C:extracellular region			XP_001122516.2:- PREDICTED: venom allergen 5-like [Apis mellifera]
Cflo_08808--XP_001603645.1_NASVI	272	kmr23_comp70782_c0_seq1	4709	253	0.7	1.41788e-116	0.93	0.16	EFN74889	28S ribosomal protein S15, mitochondrial [Camponotus floridanus]	3	F:GO:0003735; C:GO:0005840; P:GO:0006412	F:structural constituent of ribosome; C:ribosome; P:translation			#N/A
Cflo_08895--XP_001603611.1_NASVI	66	kmr25_comp37616_c0_seq1	580	66	0.955	4.86196e-41	1	0.34	EFN61725	Venom allergen 5 [Camponotus floridanus]						XP_001122516.2:- PREDICTED: venom allergen 5-like [Apis mellifera]
Cflo_09092--NA	88	kmr27_comp79573_c0_seq1	394	74	0.784	2.58866e-31	0.84	0.57	EFN63903	hypothetical protein EAG_14990 [Camponotus floridanus]						#N/A
Cflo_09322--XP_395881.3_APIME	738	kmr23_comp74486_c0_seq1	1155	303	0.878	0	0.41	0.78	EFN71282	Mitochondrial 2-oxoglutarate/malate carrier protein [Camponotus floridanus]	2	C:GO:0016021; P:GO:0006810	C:integral component of membrane; P:transport			XP_395881.4:- PREDICTED: mitochondrial 2-oxoglutarate/malate carrier protein-like [Apis mellifera]
Cflo_09323--XP_396739.3_APIME	260	kmr29_comp80011_c0_seq2	1178	260	0.865	8.26633e-170	1	0.66	EFN71283	Mitochondrial 2-oxoglutarate/malate carrier protein [Camponotus floridanus]	2	C:GO:0016021; P:GO:0006810	C:integral component of membrane; P:transport			XP_396739.4:- PREDICTED: IQ domain-containing protein H-like [Apis mellifera]
Cflo_09338--XP_394590.3_APIME	166	kmr25_comp83433_c0_seq6	1609	153	0.987	1.83775e-104	0.92	0.29	EFN60475	hypothetical protein EAG_07704 [Camponotus floridanus]	1	F:GO:0005515	F:protein binding			#N/A
Cflo_09439--NA	236	kmr25_comp61890_c0_seq2	262	84	0.905	2.08989e-08	0.36	0.32	EFN74623	hypothetical protein EAG_01358 [Camponotus floridanus]						#N/A
Cflo_09553--XP_396731.2_APIME	435	kmr23_comp33404_c0_seq1	1984	435	0.91	0	1	0.66	EFN64797	Cyclin-dependent kinase-like 2 [Camponotus floridanus]	3	F:GO:0005524; F:GO:0004674; P:GO:0006468	F:ATP binding; F:protein serine/threonine kinase activity; P:protein phosphorylation	EC:2.7.11	Transferring phosphorus-containing groups	XP_392504.3:- PREDICTED: protein kinase shaggy isoform 1 [Apis mellifera]
Cflo_09569--XP_394959.3_APIME	1146	kmr25_comp74361_c2_seq1	554	184	0.924	2.94318e-115	0.16	1	EFN79889	Plasminogen [Harpegnathos saltator]						XP_395557.4:- PREDICTED: A disintegrin and metalloproteinase with thrombospondin motifs 9-like [Apis mellifera]
Cflo_09722--XP_001122191.1_APIME	316	kmr23_comp59151_c1_seq1	283	113	0.761	5.52089e-53	0.36	1	EFN70898	hypothetical protein EAG_05647 [Camponotus floridanus]	4	F:GO:0005549; C:GO:0016021; P:GO:0050911; F:GO:0004984	F:odorant binding; C:integral component of membrane; P:detection of chemical stimulus involved in sensory perception of smell; F:olfactory receptor activity			#N/A
Cflo_10105--XP_395629.2_APIME	343	kmr29_comp96944_c1_seq24	1056	335	0.752	0	0.98	0.95	EFN62026	Acyl-CoA Delta(11) desaturase [Camponotus floridanus]	4	F:GO:0016717; C:GO:0016021; P:GO:0055114; P:GO:0006633	F:oxidoreductase activity, acting on paired donors, with oxidation of a pair of donors resulting in the reduction of molecular oxygen to two molecules of water; C:integral component of membrane; P:oxidation-reduction process; P:fatty acid biosynthetic process	EC:1.14.19	Acting on paired donors, with incorporation or reduction of molecular oxygen. The oxygen incorporated need not be derived from O(2)	#N/A
Cflo_10107--XP_395629.2_APIME	347	kmr29_comp96944_c1_seq24	1056	331	0.74	0	0.95	0.95	EFN62028	Acyl-CoA Delta(11) desaturase [Camponotus floridanus]	4	F:GO:0016717; C:GO:0016021; P:GO:0055114; P:GO:0006633	F:oxidoreductase activity, acting on paired donors, with oxidation of a pair of donors resulting in the reduction of molecular oxygen to two molecules of water; C:integral component of membrane; P:oxidation-reduction process; P:fatty acid biosynthetic process	EC:1.14.19	Acting on paired donors, with incorporation or reduction of molecular oxygen. The oxygen incorporated need not be derived from O(2)	#N/A
Cflo_10179--XP_001600242.1_NASVI	970	kmr29_comp93851_c0_seq1	2730	967	0.723	0	1	0.92	EFN72408	Ribonucleases P/MRP protein subunit POP1 [Camponotus floridanus]	3	P:GO:0090502; F:GO:0004526; P:GO:0001682	P:RNA phosphodiester bond hydrolysis, endonucleolytic; F:ribonuclease P activity; P:tRNA 5'-leader removal	EC:3.1.30; EC:3.1.26; EC:3.1.26.5	Acting on ester bonds; Acting on ester bonds; Ribonuclease P	#N/A
Cflo_10451--XP_001601873.1_NASVI	189	kmr23_comp74688_c0_seq1	807	189	0.751	7.38132e-95	1	0.71	EFN72543	hypothetical protein EAG_01958 [Camponotus floridanus]						#N/A
Cflo_10452--XP_394805.3_APIME	261	kmr23_comp87757_c0_seq1	658	213	0.93	7.23335e-144	0.82	0.99	EFN72544	EF-hand calcium-binding domain-containing protein 1 [Camponotus floridanus]	1	F:GO:0005509	F:calcium ion binding			XP_003250394.1:- PREDICTED: EF-hand calcium-binding domain-containing protein 1-like [Apis mellifera]
Cflo_10458--XP_001121170.1_APIME	226	kmr23_comp32780_c0_seq1	253	83	0.964	3.41984e-52	0.37	0.99	EFN65816	H2.0-like homeobox protein [Camponotus floridanus]	3	C:GO:0005634; P:GO:0006355; F:GO:0043565	C:nucleus; P:regulation of transcription, DNA-templated; F:sequence-specific DNA binding			XP_392622.4:- PREDICTED: protein apterous isoform X2 [Apis mellifera]
Cflo_10488--XP_396548.3_APIME	672	kmr23_comp69625_c0_seq1	3880	33	0.848	1.78937e-09	0.05	0.03	EFN66792	hypothetical protein EAG_01802 [Camponotus floridanus]						#N/A
Cflo_10580--BGIBMGA000663-PA_BOMMO	170	kmr27_comp81683_c0_seq2	1135	81	0.79	3.07022e-05	0.48	0.22	EFN69232	hypothetical protein EAG_12377 [Camponotus floridanus]						#N/A
Cflo_10727--XP_001120278.1_APIME	164	kmr27_comp89812_c6_seq1	1084	160	0.963	5.70717e-83	0.98	0.45	EFN72416	Homeotic protein labial [Camponotus floridanus]	3	C:GO:0005634; P:GO:0006355; F:GO:0043565	C:nucleus; P:regulation of transcription, DNA-templated; F:sequence-specific DNA binding			#N/A
Cflo_10788--XP_001121451.1_APIME	483	kmr25_comp85068_c3_seq2	1886	483	0.845	0	1	0.77	EFN64758	Protein FAM154A [Camponotus floridanus]	1	F:GO:0008017	F:microtubule binding			XP_001120474.2:- PREDICTED: hypothetical protein LOC725812 [Apis mellifera]
Cflo_11108--XP_393878.2_APIME	64	kmr27_comp83587_c0_seq2	854	63	0.937	1.48051e-36	0.98	0.22	EFN60459	Insulin-like growth factor 2 mRNA-binding protein 3-A [Camponotus floridanus]	2	F:GO:0000166; F:GO:0003676	F:nucleotide binding; F:nucleic acid binding			#N/A
Cflo_11333--XP_001122015.1_APIME	237	kmr29_comp96619_c3_seq1	1316	237	0.806	1.38363e-126	1	0.63	EFN67112	hypothetical protein EAG_12674 [Camponotus floridanus]	1	C:GO:0016021	C:integral component of membrane			#N/A
Cflo_11349--NA	73	kmr31_comp1182_c1_seq1	2689	45	0.711	3.00523e-07	0.62	0.05	EFN70454	hypothetical protein EAG_09835 [Camponotus floridanus]						#N/A
Cflo_11361--XP_624176.2_APIME	493	kmr23_comp36207_c0_seq1	820	250	0.956	1.22029e-154	0.51	0.92	EFN70466	Katanin p60 ATPase-containing subunit A-like 2 [Camponotus floridanus]	2	F:GO:0005524; F:GO:0005515	F:ATP binding; F:protein binding			XP_623743.2:- PREDICTED: 26S protease regulatory subunit 7 [Apis mellifera]
Cflo_11421--NA	229	kmr25_comp78891_c0_seq2	730	162	0.741	1.38357e-69	0.71	0.67	EFN69217	hypothetical protein EAG_09347 [Camponotus floridanus]						#N/A
Cflo_11544--XP_001121287.1_APIME	766	kmr25_comp79587_c0_seq2	1986	674	0.791	0	0.88	0.75	EFN71879	Protein I'm not dead yet [Camponotus floridanus]	4	P:GO:0006814; P:GO:0055085; C:GO:0016021; F:GO:0005215	P:sodium ion transport; P:transmembrane transport; C:integral component of membrane; F:transporter activity			#N/A
Cflo_11571--NA	201	kmr27_comp89859_c0_seq1	565	120	0.717	6.38449e-51	0.6	0.65	EFN73582	hypothetical protein EAG_01900 [Camponotus floridanus]						#N/A
Cflo_11699--NP_001012645.1_APIME	836	kmr29_comp92344_c0_seq4	1338	425	0.913	0	0.51	0.96	EFN60654	Soluble guanylate cyclase 88E [Camponotus floridanus]	6	F:GO:0000166; P:GO:0006182; F:GO:0004383; C:GO:0005622; P:GO:0035556; F:GO:0020037	F:nucleotide binding; P:cGMP biosynthetic process; F:guanylate cyclase activity; C:intracellular; P:intracellular signal transduction; F:heme binding	EC:4.6.1.2	Guanylate cyclase	#N/A
Cflo_11801--NP_113609.1_HUMAN	94	kmr23_comp34664_c0_seq1	2078	94	0.872	5.69561e-53	1	0.14	EFN64474	Tetratricopeptide repeat protein 25 [Camponotus floridanus]	1	F:GO:0005515	F:protein binding			#N/A
Cflo_12343--XP_396228.3_APIME	4794	kmr23_comp61454_c0_seq1	4025	1341	0.915	0	0.28	1	EFN65120	Dynein heavy chain 10, axonemal [Camponotus floridanus]	6	F:GO:0016887; F:GO:0005524; F:GO:0003777; C:GO:0030286; P:GO:0007018; C:GO:0005930	F:ATPase activity; F:ATP binding; F:microtubule motor activity; C:dynein complex; P:microtubule-based movement; C:axoneme	EC:3.6.1.3; EC:3.6.1.15	Adenosinetriphosphatase; Nucleoside-triphosphate phosphatase	XP_003251067.1:- PREDICTED: dynein heavy chain 10, axonemal-like [Apis mellifera]
Cflo_12455--NA	111	kmr27_comp81471_c0_seq9	480	41	0.902	4.97706e-05	0.37	0.26	EFN64330	hypothetical protein EAG_02650 [Camponotus floridanus]						#N/A
Cflo_12477--XP_001121211.1_APIME	378	kmr29_comp91580_c0_seq4	1481	378	0.886	0	1	0.77	EFN72246	Aldose 1-epimerase [Camponotus floridanus]	3	P:GO:0019318; F:GO:0030246; F:GO:0016853	P:hexose metabolic process; F:carbohydrate binding; F:isomerase activity			XP_001121211.2:- PREDICTED: aldose 1-epimerase-like [Apis mellifera]
Cflo_12828--XP_001121910.1_APIME	356	kmr23_comp40441_c1_seq1	338	96	0.979	4.06534e-43	0.27	0.86	EFN69116	Transcription factor SOX-21 [Camponotus floridanus]						#N/A
Cflo_12930--XP_392269.3_APIME	1680	kmr23_comp69956_c0_seq1	2529	645	0.935	0	0.38	0.77	EFN67671	Succinate dehydrogenase [ubiquinone] flavoprotein subunit, mitochondrial [Camponotus floridanus]	5	F:GO:0008177; F:GO:0050660; P:GO:0006099; P:GO:0022900; C:GO:0005743	F:succinate dehydrogenase (ubiquinone) activity; F:flavin adenine dinucleotide binding; P:tricarboxylic acid cycle; P:electron transport chain; C:mitochondrial inner membrane	EC:1.3.99.1; EC:1.3.5.1	Deleted entry; Succinate dehydrogenase (quinone)	XP_392269.4:- PREDICTED: succinate dehydrogenase [ubiquinone] flavoprotein subunit, mitochondrial-like [Apis mellifera]
Cflo_13635--XP_001121075.1_APIME	842	kmr31_comp8636_c0_seq1	3808	839	0.839	0	1	0.66	EFN62693	IQ and AAA domain-containing protein [Camponotus floridanus]	2	F:GO:0005524; F:GO:0005515	F:ATP binding; F:protein binding			XP_001121075.2:- PREDICTED: IQ and AAA domain-containing protein 1-like isoform X1 [Apis mellifera]
Cflo_13827--XP_001122550.1_APIME	205	kmr23_comp67862_c0_seq1	756	177	0.701	4.89685e-80	0.86	0.69	EFN72089	hypothetical protein EAG_03057 [Camponotus floridanus]	1	F:GO:0003676	F:nucleic acid binding			#N/A
Cflo_13872--XP_001599710.1_NASVI	383	kmr27_comp91804_c4_seq2	1333	307	0.769	3.18244e-163	0.8	0.71	EFN62122	hypothetical protein EAG_03279 [Camponotus floridanus]						#N/A
Cflo_13915--XP_001120083.1_APIME	134	kmr29_comp83701_c1_seq1	694	120	0.925	3.06255e-61	0.9	0.52	EFN61151	hypothetical protein EAG_02596 [Camponotus floridanus]						#N/A
Cflo_14281--XP_001601154.1_NASVI	574	kmr25_comp79656_c0_seq1	1693	353	0.72	2.6806e-167	0.61	0.63	EFN70002	hypothetical protein EAG_10539 [Camponotus floridanus]						#N/A
Cflo_14795--XP_001601600.1_NASVI	153	kmr23_comp63549_c0_seq1	314	104	0.74	3.55044e-52	0.68	1	XP_002012371	GI21899 [Drosophila mojavensis] >gi|193909040|gb|EDW07907.1| GI21899 [Drosophila mojavensis]						#N/A
Cflo_14834--XP_001599710.1_NASVI	377	kmr27_comp91804_c4_seq2	1333	292	0.812	2.54308e-163	0.77	0.7	EFN62122	hypothetical protein EAG_03279 [Camponotus floridanus]						#N/A
Cflo_14956--XP_001952159.1_ACYPI	214	kmr27_comp58322_c1_seq1	562	53	0.736	2.19684e-18	0.25	0.29	EFN68716	Putative AC9 transposase [Camponotus floridanus]	1	F:GO:0003676	F:nucleic acid binding			#N/A
Cflo_15437--XP_395361.3_APIME	179	kmr25_comp84963_c0_seq1	4094	179	0.961	1.38928e-112	1	0.13	EFN60879	Dynein beta chain, ciliary [Camponotus floridanus]	5	F:GO:0016887; F:GO:0005524; F:GO:0003777; C:GO:0030286; P:GO:0003341	F:ATPase activity; F:ATP binding; F:microtubule motor activity; C:dynein complex; P:cilium movement	EC:3.6.1.3; EC:3.6.1.15	Adenosinetriphosphatase; Nucleoside-triphosphate phosphatase	XP_623957.3:- PREDICTED: dynein beta chain, ciliary-like isoform X2 [Apis mellifera]
Cflo_15632--XP_394220.1_APIME	139	kmr23_comp62410_c0_seq1	2163	138	0.928	3.0623e-81	0.99	0.19	EFN62317	Choline dehydrogenase [Camponotus floridanus]	4	F:GO:0016614; F:GO:0050660; C:GO:0016021; P:GO:0055114	F:oxidoreductase activity, acting on CH-OH group of donors; F:flavin adenine dinucleotide binding; C:integral component of membrane; P:oxidation-reduction process			#N/A
Cflo_17030--NA	25	kmr23_comp71470_c0_seq1	1888	23	0.826	3.75292e-05	0.92	0.04	NA	NA						#N/A

## Sheet: Queen_Specific_Final-TA
Table S3_B) list of Queen specific gene from Final-TA assembly.
C. floridanus Gene ID	C. floridanus Gene Length	Final-TA ID	Final-TA Length	alignment Length	Identity	E-Value	Protein Coverage	TA Coverage	NCBI ID	Description of Annotation	#GO	GO IDs	GO Names	Enzyme Codes	Enzyme Names
Cflo_00082--NA	118	kmr23_comp86719_c0_seq1	2705	86	0.779	3.81524e-37	0.73	0.1	EFN69358	hypothetical protein EAG_01098 [Camponotus floridanus]
Cflo_00165--XP_001120851.1_APIME	854	kmr29_comp95868_c0_seq4	2566	814	0.941	0	0.95	0.95	EFN72932	Integrin beta-PS [Camponotus floridanus]	3	P:GO:0007229; C:GO:0016021; P:GO:0007155	P:integrin-mediated signaling pathway; C:integral component of membrane; P:cell adhesion
Cflo_00520--NA	472	kmr23_comp58501_c0_seq1	190	53	0.887	4.71386e-23	0.11	0.86	EFN73655	hypothetical protein EAG_08452 [Camponotus floridanus]
Cflo_00668--NA	144	kmr27_comp89799_c3_seq27	960	137	0.934	1.05112e-59	0.95	0.43	EFN72653	hypothetical protein EAG_06837 [Camponotus floridanus]
Cflo_00955--XP_623911.2_APIME	2030	kmr23_comp77183_c0_seq1	6413	2029	0.769	0	1	0.96	EFN68217	Serine protease nudel [Camponotus floridanus]	5	P:GO:0006508; C:GO:0016021; F:GO:0004252; F:GO:0005044; P:GO:0006898	P:proteolysis; C:integral component of membrane; F:serine-type endopeptidase activity; F:scavenger receptor activity; P:receptor-mediated endocytosis	EC:3.4.21	Acting on peptide bonds (peptidases)
Cflo_01245--NA	44	kmr23_comp28874_c0_seq1	1066	44	0.795	3.39123e-16	1	0.12	EFN62284	Transposable element Tc1 transposase [Camponotus floridanus]
Cflo_01382--XP_392300.3_APIME	2212	kmr25_comp85078_c1_seq1	7893	2211	0.926	0	1	0.86	EFN71076	Protein dachsous [Camponotus floridanus]	4	F:GO:0005509; C:GO:0016021; P:GO:0007156; C:GO:0005886	F:calcium ion binding; C:integral component of membrane; P:homophilic cell adhesion via plasma membrane adhesion molecules; C:plasma membrane
Cflo_01430--NA	279	kmr23_comp40520_c0_seq1	297	61	0.705	2.31522e-19	0.22	0.64	EFN71122	hypothetical protein EAG_06279 [Camponotus floridanus]	1	C:GO:0016021	C:integral component of membrane
Cflo_01513--XP_394683.3_APIME	468	kmr27_comp82671_c0_seq3	662	196	0.923	1.53814e-126	0.42	0.89	EFN60742	hypothetical protein EAG_09381 [Camponotus floridanus]	3	F:GO:0005525; P:GO:0007165; C:GO:0016020	F:GTP binding; P:signal transduction; C:membrane
Cflo_01645--XP_392727.2_APIME	234	kmr25_comp83671_c1_seq3	1648	232	0.724	3.39497e-51	0.99	0.48	EFN68484	hypothetical protein EAG_10458 [Camponotus floridanus]	3	F:GO:0016758; C:GO:0016020; P:GO:0008152	F:transferase activity, transferring hexosyl groups; C:membrane; P:metabolic process
Cflo_01690--XP_394509.1_APIME	367	kmr29_comp83774_c0_seq2	1567	299	0.987	0	0.81	0.57	EFN61928	Two pore potassium channel protein sup-9 [Camponotus floridanus]	3	P:GO:0071805; C:GO:0016021; F:GO:0005267	P:potassium ion transmembrane transport; C:integral component of membrane; F:potassium channel activity
Cflo_01717--XP_001121389.1_APIME	165	kmr25_comp52313_c1_seq1	213	47	0.872	5.80891e-23	0.28	0.66	EFN74027	Cuticle protein 19 [Camponotus floridanus]	1	F:GO:0042302	F:structural constituent of cuticle
Cflo_01722--XP_001121389.1_APIME	95	kmr23_comp31386_c0_seq1	254	79	0.937	3.25149e-47	0.83	0.94	EFN74032	Cuticle protein [Camponotus floridanus]	1	F:GO:0042302	F:structural constituent of cuticle
Cflo_01885--NA	196	kmr29_comp96021_c4_seq6	371	21	1	1.82989e-05	0.11	0.17	EFN64166	hypothetical protein EAG_08268 [Camponotus floridanus]
Cflo_02164--XP_001122464.1_APIME	402	kmr23_comp64850_c1_seq1	289	96	0.99	1.24722e-36	0.24	1	EGI62789	Doublesex- and mab-3-related transcription factor A2 [Acromyrmex echinatior]	4	C:GO:0005634; F:GO:0003700; P:GO:0006355; F:GO:0043565	C:nucleus; F:transcription factor activity, sequence-specific DNA binding; P:regulation of transcription, DNA-templated; F:sequence-specific DNA binding
Cflo_02247--XP_625003.1_APIME	319	kmr29_comp93860_c0_seq1	3707	263	0.76	1.84292e-134	0.82	0.22	EFN65532	RNA (guanine-9-)-methyltransferase domain-containing protein 1-like protein, mitochondrial [Camponotus floridanus]	3	C:GO:0005739; F:GO:0008168; P:GO:0032259	C:mitochondrion; F:methyltransferase activity; P:methylation
Cflo_02320--BGIBMGA001565-PA_BOMMO	238	kmr25_comp85812_c8_seq15	325	53	0.906	1.90992e-17	0.22	0.49	EFN64437	hypothetical protein EAG_00867 [Camponotus floridanus]
Cflo_02368--NA	118	kmr23_comp8723_c0_seq1	306	80	0.725	5.93726e-34	0.68	0.76	EFN67506	hypothetical protein EAG_02893 [Camponotus floridanus]	3	F:GO:0008061; P:GO:0006030; C:GO:0005576	F:chitin binding; P:chitin metabolic process; C:extracellular region
Cflo_02541--XP_001607078.1_NASVI	71	kmr23_comp59963_c0_seq1	221	71	0.93	4.50033e-44	1	0.97	EFN73523	Rotatin [Camponotus floridanus]	3	C:GO:0005813; C:GO:0036064; P:GO:0044782	C:centrosome; C:ciliary basal body; P:cilium organization
Cflo_02631--NA	172	kmr23_comp68895_c3_seq1	268	44	0.727	5.62927e-18	0.26	0.53	EFN68115	hypothetical protein EAG_10699 [Camponotus floridanus]
Cflo_02686--NA	213	kmr27_comp88292_c0_seq2	1455	62	0.887	1.06119e-17	0.29	0.13	EFN62528	hypothetical protein EAG_13843 [Camponotus floridanus]
Cflo_02993--NA	281	kmr29_comp72988_c0_seq1	448	32	0.719	3.52967e-07	0.11	0.21	EFN63149	hypothetical protein EAG_12888 [Camponotus floridanus]
Cflo_02997--NA	81	kmr29_comp80699_c1_seq1	405	51	0.922	8.2692e-25	0.63	0.38	EFN63153	hypothetical protein EAG_12892 [Camponotus floridanus]
Cflo_03051--NA	79	kmr23_comp46519_c0_seq1	781	79	0.911	3.31082e-49	1	0.3	EFN73193	hypothetical protein EAG_05319 [Camponotus floridanus]
Cflo_03056--NA	112	kmr25_comp83377_c2_seq3	310	36	0.861	1.22735e-14	0.32	0.35	EFN73198	hypothetical protein EAG_05324 [Camponotus floridanus]
Cflo_03060--NA	242	kmr23_comp46475_c0_seq1	270	40	0.8	6.4637e-17	0.17	0.44	EFN73202	hypothetical protein EAG_05328 [Camponotus floridanus]
Cflo_03158--XP_623802.1_APIME	315	kmr23_comp91217_c0_seq1	833	250	0.836	1.29186e-154	0.79	0.9	EFN61517	4-nitrophenylphosphatase [Camponotus floridanus]	1	F:GO:0016787	F:hydrolase activity
Cflo_03368--XP_001120564.1_APIME	536	kmr23_comp175707_c0_seq1	232	110	0.745	1.55802e-21	0.21	0.74	EFN71824	Putative odorant receptor 13a [Camponotus floridanus]	4	F:GO:0005549; C:GO:0016021; P:GO:0050911; F:GO:0004984	F:odorant binding; C:integral component of membrane; P:detection of chemical stimulus involved in sensory perception of smell; F:olfactory receptor activity
Cflo_03478--XP_001120330.1_APIME	442	kmr23_comp67691_c0_seq1	2862	269	0.929	7.96339e-169	0.61	0.28	EFN65295	hypothetical protein EAG_07230 [Camponotus floridanus]
Cflo_03509--XP_001120275.1_APIME	347	kmr23_comp64449_c1_seq1	144	36	1	3.08301e-17	0.1	0.75	EFN67682	hypothetical protein EAG_03245 [Camponotus floridanus]	2	C:GO:0005634; F:GO:0003677	C:nucleus; F:DNA binding
Cflo_03579--NA	129	kmr23_comp122301_c0_seq1	436	126	0.841	1.48082e-48	0.98	0.88	EFN64574	hypothetical protein EAG_14493 [Camponotus floridanus]	3	F:GO:0030414; C:GO:0005576; P:GO:0010466	F:peptidase inhibitor activity; C:extracellular region; P:negative regulation of peptidase activity
Cflo_03633--XP_001119966.1_APIME	55	kmr25_comp77174_c2_seq1	1022	55	1	9.63283e-33	1	0.16	EFZ14382	hypothetical protein SINV_12755 [Solenopsis invicta]	2	C:GO:0005634; F:GO:0003677	C:nucleus; F:DNA binding
Cflo_03646--NA	661	kmr23_comp13934_c0_seq1	185	36	0.861	1.68786e-10	0.05	0.62	EFN62931	hypothetical protein EAG_15824 [Camponotus floridanus]
Cflo_03749--NA	466	kmr23_comp30812_c1_seq1	457	157	0.745	1.07348e-65	0.34	1	EFN74460	hypothetical protein EAG_08914 [Camponotus floridanus]
Cflo_03858--XP_001606330.1_NASVI	86	kmr29_comp82294_c0_seq1	650	86	0.86	2.47366e-46	1	0.4	EFN70657	hypothetical protein EAG_03846 [Camponotus floridanus]	4	F:GO:0005549; C:GO:0016021; P:GO:0050911; F:GO:0004984	F:odorant binding; C:integral component of membrane; P:detection of chemical stimulus involved in sensory perception of smell; F:olfactory receptor activity
Cflo_03866--XP_001606330.1_NASVI	61	kmr29_comp82294_c0_seq1	650	57	0.754	9.83637e-25	0.93	0.26	EFN70665	hypothetical protein EAG_03854 [Camponotus floridanus]	4	F:GO:0005549; C:GO:0016021; P:GO:0050911; F:GO:0004984	F:odorant binding; C:integral component of membrane; P:detection of chemical stimulus involved in sensory perception of smell; F:olfactory receptor activity
Cflo_03871--XP_001606330.1_NASVI	52	kmr27_comp85772_c0_seq1	309	52	0.788	8.83038e-24	1	0.5	EFN70670	hypothetical protein EAG_03859 [Camponotus floridanus]	4	F:GO:0005549; C:GO:0016020; P:GO:0050911; F:GO:0004984	F:odorant binding; C:membrane; P:detection of chemical stimulus involved in sensory perception of smell; F:olfactory receptor activity
Cflo_03875--NA	52	kmr27_comp85772_c0_seq1	309	52	0.712	2.40869e-19	1	0.5	EFN70674	hypothetical protein EAG_03863 [Camponotus floridanus]	4	F:GO:0005549; C:GO:0016020; P:GO:0050911; F:GO:0004984	F:odorant binding; C:membrane; P:detection of chemical stimulus involved in sensory perception of smell; F:olfactory receptor activity
Cflo_04151--NA	99	kmr23_comp42905_c0_seq1	361	26	0.808	8.75658e-08	0.26	0.22	EFN74577	hypothetical protein EAG_11100 [Camponotus floridanus]
Cflo_04188--NA	385	kmr25_comp84607_c2_seq9	3833	39	0.974	3.62194e-14	0.1	0.03	EFN69691	hypothetical protein EAG_11821 [Camponotus floridanus]
Cflo_04313--NA	135	kmr23_comp66180_c0_seq1	301	47	0.957	2.8558e-30	0.35	0.47	EFN61687	hypothetical protein EAG_12691 [Camponotus floridanus]
Cflo_04387--XP_001120758.1_APIME	134	kmr29_comp40374_c0_seq1	1287	134	0.746	4.9059e-42	1	0.37	EFN60520	Zinc finger protein 567 [Camponotus floridanus]	2	F:GO:0003676; F:GO:0046872	F:nucleic acid binding; F:metal ion binding
Cflo_04598--XP_001120541.1_APIME	138	kmr23_comp101506_c0_seq1	378	118	0.72	2.13454e-55	0.86	0.95	EFN70251	Larval cuticle protein LCP-17 [Camponotus floridanus]	2	C:GO:0016021; F:GO:0042302	C:integral component of membrane; F:structural constituent of cuticle
Cflo_04982--NA	69	kmr27_comp85895_c4_seq2	1366	35	0.771	6.14468e-08	0.51	0.08	EFN67018	hypothetical protein EAG_04311 [Camponotus floridanus]
Cflo_05203--XP_394522.2_APIME	433	kmr27_comp90846_c4_seq19	1403	387	0.788	0	0.89	0.83	EFN66207	Glutamate receptor, ionotropic kainate 2 [Camponotus floridanus]	7	C:GO:0045211; P:GO:0034220; C:GO:0016021; C:GO:0030054; P:GO:0035235; F:GO:0004970; F:GO:0005234	C:postsynaptic membrane; P:ion transmembrane transport; C:integral component of membrane; C:cell junction; P:ionotropic glutamate receptor signaling pathway; F:ionotropic glutamate receptor activity; F:extracellular-glutamate-gated ion channel activity
Cflo_05365--NA	139	kmr23_comp61728_c1_seq1	331	61	0.852	5.79352e-32	0.44	0.55	EFN66608	hypothetical protein EAG_15606 [Camponotus floridanus]
Cflo_05516--XP_001120392.1_APIME	116	kmr23_comp69501_c10_seq1	2306	66	0.939	7.99921e-33	0.57	0.09	EFN64312	Wiskott-Aldrich syndrome protein family member 2 [Camponotus floridanus]
Cflo_05536--NA	110	kmr29_comp94902_c3_seq1	609	34	0.706	1.72713e-14	0.31	0.17	EFN66819	hypothetical protein EAG_07983 [Camponotus floridanus]
Cflo_05542--NA	97	kmr25_comp81787_c2_seq6	313	36	0.972	2.37447e-09	0.37	0.36	EFN66825	hypothetical protein EAG_07989 [Camponotus floridanus]	3	C:GO:0005634; P:GO:0006355; F:GO:0043565	C:nucleus; P:regulation of transcription, DNA-templated; F:sequence-specific DNA binding
Cflo_05679--NA	291	kmr23_comp59467_c0_seq1	401	64	0.938	3.17403e-34	0.22	0.48	EFN73151	hypothetical protein EAG_15249 [Camponotus floridanus]
Cflo_05865--XP_001121542.1_APIME	133	kmr23_comp60530_c0_seq1	593	111	0.973	4.77884e-76	0.83	0.56	EFN73256	Zinc finger protein 214 [Camponotus floridanus]	2	F:GO:0003676; F:GO:0046872	F:nucleic acid binding; F:metal ion binding
Cflo_06012--NA	418	kmr29_comp95570_c0_seq2	4360	130	0.854	5.12021e-39	0.31	0.11	EFN64176	hypothetical protein EAG_10242 [Camponotus floridanus]	2	C:GO:0016020; C:GO:0016021	C:membrane; C:integral component of membrane
Cflo_06075--NA	392	kmr25_comp82966_c0_seq4	1250	36	0.833	2.63516e-11	0.09	0.09	EFN71213	hypothetical protein EAG_13516 [Camponotus floridanus]
Cflo_06109--XP_624729.1_APIME	483	kmr23_comp31607_c0_seq1	765	162	0.864	1.02897e-81	0.34	0.64	EFN66034	G-protein coupled receptor Mth2 [Camponotus floridanus]	1	C:GO:0016021	C:integral component of membrane
Cflo_06242--XP_001120057.1_APIME	449	kmr23_comp75607_c0_seq1	3224	372	0.855	5.56348e-80	0.83	0.41	EGI68915	Zinc finger protein 358 [Acromyrmex echinatior]	2	F:GO:0003676; F:GO:0046872	F:nucleic acid binding; F:metal ion binding
Cflo_06403--NA	45	kmr29_comp95854_c2_seq8	1459	42	0.881	1.68834e-17	0.93	0.09	XP_002031323	GM25931 [Drosophila sechellia]
Cflo_06594--NA	501	kmr23_comp44083_c0_seq1	247	89	0.888	3.35799e-25	0.18	0.99	EFN62093	hypothetical protein EAG_04227 [Camponotus floridanus]
Cflo_06626--XP_393728.3_APIME	978	kmr25_comp85275_c0_seq1	2640	593	0.985	0	0.61	0.67	EFN64605	Netrin receptor UNC5C [Camponotus floridanus]	2	P:GO:0007165; C:GO:0016021	P:signal transduction; C:integral component of membrane
Cflo_06714--NA	147	kmr23_comp28874_c0_seq1	1066	146	0.829	1.88298e-62	0.99	0.42	EFN80244	Transposable element Tcb1 transposase [Harpegnathos saltator]
Cflo_06811--XP_001120461.1_APIME	1046	kmr29_comp96435_c0_seq24	3094	562	0.815	0	0.54	0.53	EFN64674	Atrial natriuretic peptide receptor A [Camponotus floridanus]	8	F:GO:0005524; P:GO:0006182; C:GO:0016021; F:GO:0004383; F:GO:0004672; P:GO:0006468; C:GO:0005622; P:GO:0035556	F:ATP binding; P:cGMP biosynthetic process; C:integral component of membrane; F:guanylate cyclase activity; F:protein kinase activity; P:protein phosphorylation; C:intracellular; P:intracellular signal transduction	EC:4.6.1.2	Guanylate cyclase
Cflo_06840--XP_394817.1_APIME	98	kmr23_comp83063_c0_seq1	910	98	0.929	1.50882e-63	1	0.32	EFN71381	hypothetical protein EAG_06680 [Camponotus floridanus]	3	F:GO:0008061; P:GO:0006030; C:GO:0005576	F:chitin binding; P:chitin metabolic process; C:extracellular region
Cflo_06859--XP_001120060.1_APIME	198	kmr23_comp97283_c0_seq1	519	164	0.72	4.2413e-63	0.83	0.64	EFN71400	Zinc finger protein 768 [Camponotus floridanus]	2	F:GO:0003676; F:GO:0046872	F:nucleic acid binding; F:metal ion binding
Cflo_06877--XP_393246.3_APIME	487	kmr23_comp133345_c0_seq1	186	49	0.857	2.26498e-18	0.1	0.79	EFN72140	hypothetical protein EAG_15981 [Camponotus floridanus]	1	C:GO:0016021	C:integral component of membrane
Cflo_06955--XP_001120703.1_APIME	318	kmr23_comp57312_c0_seq1	600	104	0.99	3.82051e-51	0.33	0.52	EFN66378	Brain-specific homeobox protein [Camponotus floridanus]	3	C:GO:0005634; P:GO:0006355; F:GO:0043565	C:nucleus; P:regulation of transcription, DNA-templated; F:sequence-specific DNA binding
Cflo_07101--XP_394796.3_APIME	385	kmr23_comp68047_c4_seq1	1497	257	0.992	0	0.67	0.52	EFN65349	Neuroligin-1 [Camponotus floridanus]
Cflo_07119--XP_393873.3_APIME	266	kmr29_comp92691_c1_seq3	1231	235	0.97	6.76699e-158	0.88	0.57	EFN64962	Intestinal alkaline phosphatase 1 [Camponotus floridanus]	2	F:GO:0016791; P:GO:0016311	F:phosphatase activity; P:dephosphorylation	EC:3.1.3.41	4-nitrophenylphosphatase
Cflo_07297--XP_001121336.1_APIME	70	kmr27_comp91613_c4_seq9	5489	27	1	2.66865e-09	0.39	0.01	#N/A	#N/A
Cflo_07679--NA	161	kmr25_comp85747_c0_seq7	1361	37	0.784	1.08802e-11	0.23	0.08	EFN66331	hypothetical protein EAG_07075 [Camponotus floridanus]
Cflo_07750--XP_001121997.1_APIME	2776	kmr25_comp84748_c0_seq1	8999	2734	0.799	0	0.98	0.9	EFN70772	Maternal protein tudor [Camponotus floridanus]
Cflo_07784--XP_395426.3_APIME	2315	kmr29_comp96776_c0_seq1	8091	2061	0.803	0	0.89	0.79	EFN75053	Fatty acid synthase [Camponotus floridanus]	5	F:GO:0016788; F:GO:0016491; P:GO:0055114; P:GO:0009058; F:GO:0016740	F:hydrolase activity, acting on ester bonds; F:oxidoreductase activity; P:oxidation-reduction process; P:biosynthetic process; F:transferase activity
Cflo_07785--XP_391831.3_APIME	482	kmr23_comp41270_c1_seq1	1364	274	0.989	4.63124e-172	0.57	0.6	EFN69740	Tyrosine-protein kinase RYK [Camponotus floridanus]	3	F:GO:0005524; P:GO:0018108; F:GO:0004713	F:ATP binding; P:peptidyl-tyrosine phosphorylation; F:protein tyrosine kinase activity	EC:2.7.10	Transferring phosphorus-containing groups
Cflo_08004--XP_394087.3_APIME	980	kmr29_comp96122_c1_seq1	4306	963	0.95	0	0.98	0.67	EFN71583	ADAM 10 [Camponotus floridanus]	4	P:GO:0007229; P:GO:0006508; C:GO:0016021; F:GO:0004222	P:integrin-mediated signaling pathway; P:proteolysis; C:integral component of membrane; F:metalloendopeptidase activity	EC:3.4.24	Acting on peptide bonds (peptidases)
Cflo_08037--XP_395027.3_APIME	1089	kmr27_comp61965_c0_seq1	477	151	0.967	7.95699e-98	0.14	0.95	EFN60323	Cytosolic carboxypeptidase 2 [Camponotus floridanus]	3	F:GO:0008270; F:GO:0004181; P:GO:0006508	F:zinc ion binding; F:metallocarboxypeptidase activity; P:proteolysis	EC:3.4.17	Acting on peptide bonds (peptidases)
Cflo_08106--NA	148	kmr23_comp49973_c0_seq1	306	38	0.868	3.09087e-15	0.26	0.37	EFN65766	hypothetical protein EAG_01257 [Camponotus floridanus]
Cflo_08124--XP_393713.2_APIME	1238	kmr29_comp95306_c1_seq1	5697	1238	0.943	0	1	0.65	EFN67144	Protein toll [Camponotus floridanus]	2	P:GO:0007165; C:GO:0016021	P:signal transduction; C:integral component of membrane
Cflo_08393--NA	46	kmr25_comp15849_c0_seq1	286	45	0.911	3.55315e-24	0.98	0.47	EFN64079	hypothetical protein EAG_02338 [Camponotus floridanus]	4	F:GO:0005549; C:GO:0016020; P:GO:0050911; F:GO:0004984	F:odorant binding; C:membrane; P:detection of chemical stimulus involved in sensory perception of smell; F:olfactory receptor activity
Cflo_08396--NA	47	kmr25_comp15849_c0_seq1	286	45	0.844	3.23811e-22	0.96	0.47	EFN64081	hypothetical protein EAG_02341 [Camponotus floridanus]	4	F:GO:0005549; C:GO:0016020; P:GO:0050911; F:GO:0004984	F:odorant binding; C:membrane; P:detection of chemical stimulus involved in sensory perception of smell; F:olfactory receptor activity
Cflo_08397--XP_623850.2_APIME	268	kmr23_comp67639_c7_seq1	501	147	0.714	1.32715e-66	0.55	0.84	EFN64082	hypothetical protein EAG_02342 [Camponotus floridanus]	4	F:GO:0005549; C:GO:0016021; P:GO:0050911; F:GO:0004984	F:odorant binding; C:integral component of membrane; P:detection of chemical stimulus involved in sensory perception of smell; F:olfactory receptor activity
Cflo_08459--XP_396471.3_APIME	218	kmr23_comp71210_c0_seq1	3266	150	0.82	7.37759e-77	0.69	0.14	EFN69066	Potassium/sodium hyperpolarization-activated cyclic nucleotide-gated channel 2 [Camponotus floridanus]
Cflo_08555--NA	163	kmr23_comp42454_c0_seq1	196	64	0.734	5.55704e-25	0.39	0.98	EFN69507	hypothetical protein EAG_11564 [Camponotus floridanus]
Cflo_08588--XP_395202.2_APIME	684	kmr23_comp75115_c0_seq1	3499	648	0.88	0	0.95	0.6	EFN71756	Valyl-tRNA synthetase, mitochondrial [Camponotus floridanus]	5	F:GO:0004832; F:GO:0005524; P:GO:0006438; P:GO:0006450; F:GO:0002161	F:valine-tRNA ligase activity; F:ATP binding; P:valyl-tRNA aminoacylation; P:regulation of translational fidelity; F:aminoacyl-tRNA editing activity	EC:6.1.1.9; EC:3.1.1.1	Valine--tRNA ligase; Carboxylesterase
Cflo_08589--XP_001122827.1_APIME	1271	kmr23_comp76486_c0_seq1	4434	1194	0.814	0	0.94	0.81	EFZ09194	hypothetical protein SINV_04956 [Solenopsis invicta]	3	F:GO:0003676; F:GO:0005524; F:GO:0004386	F:nucleic acid binding; F:ATP binding; F:helicase activity	EC:3.6.1.15	Nucleoside-triphosphate phosphatase
Cflo_08687--XP_001121922.1_APIME	151	kmr23_comp55938_c1_seq1	466	96	0.979	3.0482e-38	0.64	0.62	EFN65059	Homeobox protein goosecoid [Camponotus floridanus]	3	C:GO:0005634; P:GO:0006355; F:GO:0043565	C:nucleus; P:regulation of transcription, DNA-templated; F:sequence-specific DNA binding
Cflo_08936--XP_394522.2_APIME	631	kmr27_comp90846_c4_seq8	2108	502	0.972	0	0.8	0.72	EFN64981	Glutamate receptor, ionotropic kainate 2 [Camponotus floridanus]	7	C:GO:0045211; P:GO:0034220; C:GO:0016021; C:GO:0030054; P:GO:0035235; F:GO:0004970; F:GO:0005234	C:postsynaptic membrane; P:ion transmembrane transport; C:integral component of membrane; C:cell junction; P:ionotropic glutamate receptor signaling pathway; F:ionotropic glutamate receptor activity; F:extracellular-glutamate-gated ion channel activity
Cflo_08940--XP_001119904.1_APIME	167	kmr29_comp85955_c1_seq1	1718	158	0.981	4.27053e-93	0.95	0.28	EFN63813	T-cell leukemia homeobox protein 3 [Camponotus floridanus]	3	C:GO:0005634; P:GO:0006355; F:GO:0043565	C:nucleus; P:regulation of transcription, DNA-templated; F:sequence-specific DNA binding
Cflo_09044--XP_397395.3_APIME	216	kmr23_comp67956_c11_seq1	801	147	0.741	9.78941e-69	0.68	0.55	EFN73714	Multidrug resistance-associated protein 4 [Camponotus floridanus]	4	F:GO:0005524; F:GO:0042626; P:GO:0055085; C:GO:0016021	F:ATP binding; F:ATPase activity, coupled to transmembrane movement of substances; P:transmembrane transport; C:integral component of membrane	EC:3.6.1.3; EC:3.6.1.15	Adenosinetriphosphatase; Nucleoside-triphosphate phosphatase
Cflo_09216--NA	172	kmr23_comp75654_c0_seq1	3601	59	1	1.35659e-17	0.34	0.05	EFN64944	hypothetical protein EAG_09757 [Camponotus floridanus]
Cflo_09266--XP_391931.2_APIME	485	kmr27_comp88680_c0_seq1	2269	483	0.731	0	1	0.64	EFN69442	Cytochrome P450 6k1 [Camponotus floridanus]	6	F:GO:0005506; F:GO:0016705; C:GO:0016020; P:GO:0055114; F:GO:0004497; F:GO:0020037	F:iron ion binding; F:oxidoreductase activity, acting on paired donors, with incorporation or reduction of molecular oxygen; C:membrane; P:oxidation-reduction process; F:monooxygenase activity; F:heme binding
Cflo_09451--NP_001011576.1_APIME	426	kmr25_comp84995_c0_seq3	761	359	0.791	9.37022e-156	0.84	0.97	EFN66667	Tachykinins [Camponotus floridanus]	3	P:GO:0007218; C:GO:0016021; C:GO:0005576	P:neuropeptide signaling pathway; C:integral component of membrane; C:extracellular region
Cflo_09663--NA	176	kmr23_comp65013_c0_seq1	174	37	0.811	5.45154e-13	0.21	0.64	EFN70873	hypothetical protein EAG_04283 [Camponotus floridanus]
Cflo_09677--XP_001120923.1_APIME	212	kmr23_comp67995_c0_seq1	1012	212	0.703	9.77512e-101	1	0.62	EFN68000	Trypsin 3A1 [Camponotus floridanus]	2	P:GO:0006508; F:GO:0004252	P:proteolysis; F:serine-type endopeptidase activity	EC:3.4.21	Acting on peptide bonds (peptidases)
Cflo_09836--XP_001122124.1_APIME	1712	kmr29_comp95641_c0_seq57	7087	1712	0.96	0	1	0.73	EFN70274	NHR domain-containing protein KIAA1787-like protein [Camponotus floridanus]
Cflo_09850--NA	36	kmr23_comp29346_c0_seq1	316	34	0.735	3.93013e-10	0.94	0.33	EFN70288	hypothetical protein EAG_06641 [Camponotus floridanus]
Cflo_09881--NA	303	kmr29_comp94035_c0_seq1	339	36	0.944	5.16915e-13	0.12	0.31	EFN63943	hypothetical protein EAG_01328 [Camponotus floridanus]
Cflo_10041--XP_394796.3_APIME	146	kmr23_comp68047_c4_seq1	1497	54	0.963	1.29325e-30	0.37	0.11	EFN63272	Neuroligin-2 [Camponotus floridanus]
Cflo_10049--XP_001120463.1_APIME	169	kmr29_comp86121_c0_seq2	367	88	0.898	2.20586e-36	0.52	0.7	EFN68028	Longitudinals lacking protein, isoform G [Camponotus floridanus]	2	F:GO:0003676; F:GO:0046872	F:nucleic acid binding; F:metal ion binding
Cflo_10066--XP_001120929.1_APIME	62	kmr23_comp59176_c1_seq1	1086	62	0.984	1.58263e-36	1	0.17	EFN68045	Longitudinals lacking protein, isoforms A/B/D/L [Camponotus floridanus]	2	F:GO:0003676; F:GO:0046872	F:nucleic acid binding; F:metal ion binding
Cflo_10152--XP_396406.3_APIME	731	kmr23_comp67277_c1_seq1	1093	330	0.87	2.9955e-160	0.45	0.94	EFN72775	Protein TKR [Camponotus floridanus]	1	F:GO:0003677	F:DNA binding
Cflo_10206--XP_396734.3_APIME	295	kmr25_comp81744_c2_seq2	2381	295	0.966	0	1	1	EFN60550	Neurogenic locus Notch protein [Camponotus floridanus]	1	F:GO:0005509	F:calcium ion binding
Cflo_10252--XP_623210.1_APIME	215	kmr23_comp32139_c0_seq1	1664	212	0.75	9.23489e-113	0.99	0.38	EFN64370	Glucosylceramidase [Camponotus floridanus]	3	F:GO:0004348; P:GO:0005975; P:GO:0006665	F:glucosylceramidase activity; P:carbohydrate metabolic process; P:sphingolipid metabolic process	EC:3.2.1.45	Glucosylceramidase
Cflo_10299--XP_394125.3_APIME	68	kmr23_comp60780_c0_seq1	961	67	0.761	4.36913e-27	0.99	0.21	EFN88923	Homeobox protein HOX3 [Harpegnathos saltator]	5	C:GO:0005634; F:GO:0003700; P:GO:0007275; P:GO:0006355; F:GO:0043565	C:nucleus; F:transcription factor activity, sequence-specific DNA binding; P:multicellular organism development; P:regulation of transcription, DNA-templated; F:sequence-specific DNA binding
Cflo_10301--NA	186	kmr23_comp51882_c0_seq1	482	83	0.711	4.56773e-25	0.45	0.53	EFN68505	hypothetical protein EAG_06385 [Camponotus floridanus]
Cflo_10450--XP_393147.2_APIME	759	kmr23_comp68986_c2_seq1	2112	641	0.933	0	0.84	0.89	EFN72542	Solute carrier organic anion transporter family member 3A1 [Camponotus floridanus]	4	P:GO:0006811; C:GO:0016021; C:GO:0005886; F:GO:0005215	P:ion transport; C:integral component of membrane; C:plasma membrane; F:transporter activity
Cflo_10826--XP_623408.2_APIME	566	kmr27_comp90523_c3_seq15	1126	188	0.782	2.47283e-81	0.33	0.49	EFN70706	Neuronal acetylcholine receptor subunit alpha-7 [Camponotus floridanus]	3	P:GO:0034220; C:GO:0016021; F:GO:0005230	P:ion transmembrane transport; C:integral component of membrane; F:extracellular ligand-gated ion channel activity
Cflo_10849--NA	151	kmr23_comp28874_c0_seq1	1066	151	0.887	1.15662e-85	1	0.43	EFN62284	Transposable element Tc1 transposase [Camponotus floridanus]
Cflo_10965--XP_394107.2_APIME	1062	kmr27_comp91490_c2_seq2	4730	1062	0.968	0	1	0.68	EFN66686	Dual 3',5'-cyclic-AMP and -GMP phosphodiesterase 11 [Camponotus floridanus]	3	F:GO:0046872; P:GO:0007165; F:GO:0004114	F:metal ion binding; P:signal transduction; F:3',5'-cyclic-nucleotide phosphodiesterase activity	EC:3.1.4.17	3',5'-cyclic-nucleotide phosphodiesterase
Cflo_10967--XP_001122029.1_APIME	432	kmr23_comp43554_c1_seq1	1270	287	0.955	0	0.66	0.68	EFN66688	Synaptic vesicular amine transporter [Camponotus floridanus]	3	P:GO:0055085; F:GO:0022857; C:GO:0016021	P:transmembrane transport; F:transmembrane transporter activity; C:integral component of membrane
Cflo_11596--NA	55	kmr25_comp83204_c0_seq1	1066	54	0.889	3.18831e-29	0.98	0.15	EFN68988	hypothetical protein EAG_09661 [Camponotus floridanus]
Cflo_11783--XP_397373.2_APIME	668	kmr25_comp80000_c4_seq1	2138	498	0.924	0	0.75	0.7	EFN74608	Sodium-independent sulfate anion transporter [Camponotus floridanus]	3	F:GO:0008271; C:GO:0016021; P:GO:1902358	F:secondary active sulfate transmembrane transporter activity; C:integral component of membrane; P:sulfate transmembrane transport
Cflo_11892--NA	68	kmr23_comp28874_c0_seq1	1066	67	0.776	4.5625e-31	0.99	0.19	EFN69089	Transposable element Tc1 transposase [Camponotus floridanus]	1	C:GO:0016021	C:integral component of membrane
Cflo_12191--XP_393388.3_APIME	257	kmr23_comp58285_c1_seq1	1903	225	0.831	1.29632e-131	0.88	0.36	EFN67916	Multidrug resistance-associated protein 5 [Camponotus floridanus]	4	F:GO:0005524; F:GO:0042626; P:GO:0055085; C:GO:0016021	F:ATP binding; F:ATPase activity, coupled to transmembrane movement of substances; P:transmembrane transport; C:integral component of membrane	EC:3.6.1.3; EC:3.6.1.15	Adenosinetriphosphatase; Nucleoside-triphosphate phosphatase
Cflo_12305--XP_001945594.1_ACYPI	564	kmr23_comp50752_c0_seq1	209	69	0.899	9.70851e-37	0.12	1	EFN62669	General transcription factor II-I repeat domain-containing protein 2B [Camponotus floridanus]	2	F:GO:0003676; F:GO:0046983	F:nucleic acid binding; F:protein dimerization activity
Cflo_12377--XP_396261.2_APIME	888	kmr25_comp84645_c1_seq1	2839	836	0.812	0	0.94	0.87	EFN62134	Aminopeptidase N [Camponotus floridanus]	5	F:GO:0008270; P:GO:0006508; C:GO:0016021; F:GO:0004177; F:GO:0008237	F:zinc ion binding; P:proteolysis; C:integral component of membrane; F:aminopeptidase activity; F:metallopeptidase activity	EC:3.4.11	Acting on peptide bonds (peptidases)
Cflo_12378--XP_001121261.1_APIME	267	kmr23_comp53328_c1_seq1	470	154	0.922	1.34861e-98	0.58	1	EFN62135	Homeobox protein MOX-2 [Camponotus floridanus]	3	C:GO:0005634; P:GO:0006355; F:GO:0043565	C:nucleus; P:regulation of transcription, DNA-templated; F:sequence-specific DNA binding
Cflo_12470--XP_001601154.1_NASVI	589	kmr27_comp91807_c3_seq3	1379	327	0.771	0	0.56	0.71	EFN72169	hypothetical protein EAG_03339 [Camponotus floridanus]
Cflo_12627--XP_001599820.1_NASVI	152	kmr29_comp96198_c0_seq2	789	152	0.743	1.23292e-64	1	0.59	EFN61373	hypothetical protein EAG_06709 [Camponotus floridanus]
Cflo_13272--XP_001602640.1_NASVI	88	kmr25_comp86073_c2_seq3	1641	88	0.705	7.04054e-40	1	0.16	EFN69991	Retrovirus-related Pol polyprotein from transposon 412 [Camponotus floridanus]
Cflo_13618--XP_001602541.1_NASVI	346	kmr25_comp84931_c2_seq1	1299	243	0.934	5.64428e-168	0.7	0.56	EFN69585	hypothetical protein EAG_07978 [Camponotus floridanus]	3	F:GO:0003677; P:GO:0015074; P:GO:0006310	F:DNA binding; P:DNA integration; P:DNA recombination
Cflo_13989--XP_001601154.1_NASVI	600	kmr27_comp91807_c3_seq3	1379	330	0.764	0	0.55	0.71	EFN72169	hypothetical protein EAG_03339 [Camponotus floridanus]
Cflo_14249--XP_396942.3_APIME	39	kmr25_comp185880_c0_seq1	388	39	0.718	1.8653e-14	1	0.3	EFN70787	hypothetical protein EAG_10586 [Camponotus floridanus]
Cflo_14414--NA	120	kmr23_comp31898_c0_seq1	297	31	0.71	5.8358e-07	0.26	0.31	EFN64216	hypothetical protein EAG_07265 [Camponotus floridanus]
Cflo_14558--XP_001602015.1_NASVI	503	kmr23_comp70189_c11_seq1	1851	503	0.704	0	1	0.81	EFN83910	hypothetical protein EAI_07685 [Harpegnathos saltator]	1	C:GO:0016020	C:membrane
Cflo_14704--XP_001602480.1_NASVI	163	kmr25_comp76101_c0_seq1	1006	162	0.858	1.26427e-95	0.99	0.48	EFN60761	Putative nuclease HARBI1 [Camponotus floridanus]
Cflo_14967--XP_001119986.1_APIME	95	kmr23_comp58077_c1_seq1	940	94	0.755	2.03796e-44	0.99	0.3	EFN74758	hypothetical protein EAG_08357 [Camponotus floridanus]	1	P:GO:0008152	P:metabolic process
Cflo_15033--XP_001945218.1_ACYPI	68	kmr23_comp68067_c0_seq1	551	68	0.941	5.43137e-40	1	0.37	EFN62710	hypothetical protein EAG_08096 [Camponotus floridanus]
Cflo_15046--XP_001601154.1_NASVI	576	kmr27_comp91807_c3_seq3	1379	333	0.724	1.63961e-169	0.58	0.68	EFN72169	hypothetical protein EAG_03339 [Camponotus floridanus]
Cflo_15079--XP_624966.1_APIME	222	kmr27_comp90532_c2_seq21	1700	220	0.714	4.28219e-114	0.99	0.39	EFN62150	Lipase 3 [Camponotus floridanus]	1	F:GO:0016787	F:hydrolase activity
Cflo_15317--XP_001601154.1_NASVI	587	kmr27_comp91807_c3_seq3	1379	331	0.71	2.52406e-170	0.56	0.71	EFN72169	hypothetical protein EAG_03339 [Camponotus floridanus]
Cflo_15544--XP_001601929.1_NASVI	60	kmr25_comp86006_c2_seq6	1172	60	0.9	4.23328e-32	1	0.15	EFN68495	hypothetical protein EAG_07179 [Camponotus floridanus]	2	F:GO:0003676; P:GO:0015074	F:nucleic acid binding; P:DNA integration
Cflo_15633--XP_001122297.1_APIME	85	kmr29_comp96964_c0_seq15	416	85	0.706	1.3422e-40	1	0.62	EFN63187	Aminopeptidase N [Camponotus floridanus]	2	P:GO:0006508; F:GO:0004177	P:proteolysis; F:aminopeptidase activity	EC:3.4.11	Acting on peptide bonds (peptidases)
Cflo_15671--XP_001952164.1_ACYPI	251	kmr23_comp50752_c0_seq1	209	49	0.735	1.11162e-19	0.2	0.71	EFN62669	General transcription factor II-I repeat domain-containing protein 2B [Camponotus floridanus]	2	F:GO:0003676; F:GO:0046983	F:nucleic acid binding; F:protein dimerization activity
Cflo_15782--XP_001601154.1_NASVI	460	kmr27_comp91807_c3_seq3	1379	289	0.765	6.14588e-165	0.63	0.63	EFN67320	hypothetical protein EAG_00551 [Camponotus floridanus]
Cflo_15868--XP_395426.3_APIME	99	kmr29_comp96776_c0_seq1	8091	97	0.711	5.77459e-35	0.98	0.03	EFN75053	Fatty acid synthase [Camponotus floridanus]	2	F:GO:0003824; P:GO:0008152	F:catalytic activity; P:metabolic process
Cflo_15919--XP_001599098.1_NASVI	123	kmr25_comp80206_c0_seq1	1053	86	0.756	2.64278e-36	0.7	0.25	EFN61110	hypothetical protein EAG_03880 [Camponotus floridanus]
Cflo_16056--NA	42	kmr25_comp83204_c0_seq1	1066	42	0.857	1.6495e-20	1	0.12	EFN62283	hypothetical protein EAG_12642 [Camponotus floridanus]
Cflo_16057--BGIBMGA010626-PA_BOMMO	118	kmr23_comp28874_c0_seq1	1066	118	0.915	2.34925e-74	1	0.33	EFN62284	Transposable element Tc1 transposase [Camponotus floridanus]
Cflo_16310--XP_001600939.1_NASVI	67	kmr23_comp136773_c0_seq1	233	36	0.889	3.75718e-15	0.54	0.47	EFN62520	hypothetical protein EAG_06623 [Camponotus floridanus]	4	F:GO:0005549; C:GO:0016021; P:GO:0050911; F:GO:0004984	F:odorant binding; C:integral component of membrane; P:detection of chemical stimulus involved in sensory perception of smell; F:olfactory receptor activity
Cflo_16521--NA	37	kmr27_comp89989_c0_seq5	946	37	0.703	8.2023e-12	1	0.12	EFN74245	hypothetical protein EAG_07584 [Camponotus floridanus]	5	F:GO:0005506; F:GO:0016705; P:GO:0055114; F:GO:0004497; F:GO:0020037	F:iron ion binding; F:oxidoreductase activity, acting on paired donors, with incorporation or reduction of molecular oxygen; P:oxidation-reduction process; F:monooxygenase activity; F:heme binding
Cflo_16573--XP_001122550.1_APIME	92	kmr23_comp124085_c0_seq1	247	78	0.731	1.08576e-33	0.85	0.95	EFN69583	hypothetical protein EAG_00142 [Camponotus floridanus]	2	F:GO:0003676; F:GO:0046983	F:nucleic acid binding; F:protein dimerization activity
Cflo_16630--NA	63	kmr29_comp96619_c3_seq1	1316	63	0.73	2.90901e-27	1	0.14	EFN69621	hypothetical protein EAG_00085 [Camponotus floridanus]
Cflo_16778--XP_001949009.1_ACYPI	54	kmr27_comp91856_c0_seq3	616	50	0.72	2.64228e-20	0.93	0.24	EFN71217	hypothetical protein EAG_05969 [Camponotus floridanus]
Cflo_16842--XP_001949009.1_ACYPI	49	kmr29_comp96556_c11_seq41	285	49	0.857	6.42098e-26	1	0.52	EFN65356	hypothetical protein EAG_06564 [Camponotus floridanus]
Cflo_16948--NA	41	kmr29_comp96556_c11_seq41	285	41	0.829	3.53054e-16	1	0.44	EFN65356	hypothetical protein EAG_06564 [Camponotus floridanus]
Cflo_17001--NA	32	kmr25_comp15849_c0_seq1	286	32	0.906	3.76759e-15	1	0.34	EFN64079	hypothetical protein EAG_02338 [Camponotus floridanus]
Cflo_17011--NA	33	kmr23_comp40127_c0_seq1	1291	33	0.818	7.98534e-11	1	0.08	EFN68937	hypothetical protein EAG_02675 [Camponotus floridanus]
Cflo_17055--XP_001120719.1_APIME	32	kmr25_comp64525_c3_seq1	729	32	0.75	1.58891e-11	1	0.13	BAB86288	mariner transposase [Apis cerana]

## Sheet: Worker_Specific_Final-TA
Table S3_C) list of Worker specific gene from Final-TA assembly.
C. floridanus Gene ID	C. floridanus Gene Length	Final-TA ID	Final-TA Length	alignment Length	Identity	E-Value	Protein Coverage	TA Coverage	NCBI ID	Description of Annotation	#GO	GO IDs	GO Names	Enzyme Codes	Enzyme Names
Cflo_00048--XP_001689273.1_ANOGA	599	kmr23_comp58800_c0_seq1	166	53	0.83	1.20622e-20	0.09	0.98	EFN69324	hypothetical protein EAG_01064 [Camponotus floridanus]	3	C:GO:0016021; P:GO:0035235; F:GO:0004970	C:integral component of membrane; P:ionotropic glutamate receptor signaling pathway; F:ionotropic glutamate receptor activity
Cflo_00078--XP_394171.3_APIME	266	kmr23_comp54967_c0_seq1	123	40	1	1.86469e-21	0.15	0.98	EFN69354	Transcription factor collier [Camponotus floridanus]	6	C:GO:0005634; F:GO:0003677; F:GO:0046872; P:GO:0006351; P:GO:0007275; P:GO:0006355	C:nucleus; F:DNA binding; F:metal ion binding; P:transcription, DNA-templated; P:multicellular organism development; P:regulation of transcription, DNA-templated
Cflo_00085--XP_623932.2_APIME	475	kmr23_comp66972_c1_seq1	1390	304	0.964	0	0.64	0.66	EFN69361	Kv channel-interacting protein 4 [Camponotus floridanus]	1	F:GO:0005509	F:calcium ion binding
Cflo_00096--XP_001603213.1_NASVI	102	kmr27_comp88965_c0_seq10	1858	35	0.943	3.00402e-06	0.34	0.06	EFN69372	hypothetical protein EAG_01112 [Camponotus floridanus]
Cflo_00102--NA	589	kmr23_comp147476_c0_seq1	255	85	0.988	4.98498e-32	0.14	1	EFN69378	hypothetical protein EAG_01118 [Camponotus floridanus]
Cflo_00148--XP_393429.2_APIME	308	kmr23_comp63258_c0_seq1	208	66	0.833	2.77699e-28	0.21	0.99	EFN72915	Neither inactivation nor afterpotential protein C [Camponotus floridanus]	6	C:GO:0016459; F:GO:0005524; P:GO:0018108; F:GO:0004713; F:GO:0003779; F:GO:0003774	C:myosin complex; F:ATP binding; P:peptidyl-tyrosine phosphorylation; F:protein tyrosine kinase activity; F:actin binding; F:motor activity	EC:2.7.10; EC:3.6.1.15	Transferring phosphorus-containing groups; Nucleoside-triphosphate phosphatase
Cflo_00187--FBpp0110217_DROME	907	kmr29_comp59037_c0_seq1	801	165	0.964	5.8997e-77	0.18	0.62	EFN72953	Dystrophin, isoforms A/C/F/G [Camponotus floridanus]
Cflo_00325--NA	201	kmr25_comp84169_c3_seq1	230	40	0.85	3.56366e-16	0.2	0.53	EFN60385	hypothetical protein EAG_02097 [Camponotus floridanus]
Cflo_00384--NA	207	kmr23_comp15701_c1_seq1	235	50	0.9	3.70437e-23	0.24	0.64	EFN64807	hypothetical protein EAG_03577 [Camponotus floridanus]
Cflo_00386--NA	375	kmr23_comp21442_c1_seq1	264	54	0.944	8.33027e-28	0.14	0.61	EFN64809	hypothetical protein EAG_03579 [Camponotus floridanus]
Cflo_00419--NA	124	kmr25_comp82929_c0_seq1	2850	31	0.903	7.16121e-09	0.25	0.03	EFN64841	hypothetical protein EAG_03611 [Camponotus floridanus]
Cflo_00438--NA	347	kmr25_comp83389_c2_seq4	574	38	0.711	1.23472e-12	0.11	0.2	EFN64859	hypothetical protein EAG_03630 [Camponotus floridanus]
Cflo_00440--XP_396271.3_APIME	651	kmr23_comp69042_c5_seq1	320	106	0.991	1.9365e-69	0.16	1	EFN64861	Glutamate [NMDA] receptor subunit epsilon-2 [Camponotus floridanus]	7	C:GO:0045211; P:GO:0034220; C:GO:0016021; C:GO:0030054; P:GO:0035235; F:GO:0004970; F:GO:0005234	C:postsynaptic membrane; P:ion transmembrane transport; C:integral component of membrane; C:cell junction; P:ionotropic glutamate receptor signaling pathway; F:ionotropic glutamate receptor activity; F:extracellular-glutamate-gated ion channel activity
Cflo_00462--XP_001120547.1_APIME	123	kmr23_comp68324_c3_seq1	1118	61	0.984	3.50619e-35	0.5	0.16	EFN73598	hypothetical protein EAG_08395 [Camponotus floridanus]
Cflo_00463--XP_001120547.1_APIME	98	kmr29_comp94206_c3_seq3	1154	46	0.848	1.28183e-18	0.47	0.13	EFN73599	hypothetical protein EAG_08396 [Camponotus floridanus]
Cflo_00472--XP_001120714.1_APIME	255	kmr25_comp72641_c0_seq1	950	34	0.853	6.4086e-10	0.13	0.11	EFN73608	hypothetical protein EAG_08405 [Camponotus floridanus]
Cflo_00482--NA	91	kmr23_comp133485_c0_seq1	244	50	0.94	9.22445e-28	0.55	0.62	EFN73618	hypothetical protein EAG_08415 [Camponotus floridanus]
Cflo_00493--FBpp0085142_DROME	117	kmr23_comp47200_c0_seq1	461	61	0.902	2.68412e-30	0.52	0.41	EFN73629	hypothetical protein EAG_08426 [Camponotus floridanus]	2	C:GO:0005622; P:GO:0035556	C:intracellular; P:intracellular signal transduction
Cflo_00494--FBpp0085142_DROME	81	kmr23_comp48041_c0_seq1	603	58	0.931	1.06902e-30	0.72	0.3	EFN73630	hypothetical protein EAG_08427 [Camponotus floridanus]
Cflo_00579--NA	389	kmr25_comp84950_c1_seq18	781	80	0.875	1.18017e-12	0.21	0.31	EFN70997	hypothetical protein EAG_09886 [Camponotus floridanus]	1	C:GO:0016021	C:integral component of membrane
Cflo_00648--XP_001120626.1_APIME	344	kmr25_comp84047_c0_seq1	1564	267	0.944	4.87008e-176	0.78	0.51	EFN72633	Neurotrimin [Camponotus floridanus]
Cflo_00744--XP_001121567.1_APIME	205	kmr27_comp85244_c1_seq2	857	205	0.956	1.37539e-131	1	0.72	EFN72725	hypothetical protein EAG_06911 [Camponotus floridanus]
Cflo_00824--NA	275	kmr27_comp78368_c0_seq1	144	31	0.871	6.91353e-11	0.11	0.65	EFN67215	hypothetical protein EAG_09087 [Camponotus floridanus]
Cflo_00853--NA	432	kmr25_comp84879_c3_seq3	469	67	0.97	1.33561e-30	0.16	0.42	EFN67242	hypothetical protein EAG_09116 [Camponotus floridanus]
Cflo_00916--XP_394560.1_APIME	852	kmr29_comp90424_c0_seq1	2660	851	0.902	0	1	0.86	EFN67578	Protein jagged-1 [Camponotus floridanus]	6	C:GO:0005887; P:GO:0007219; F:GO:0005509; P:GO:0030154; F:GO:0005112; P:GO:0042127	C:integral component of plasma membrane; P:Notch signaling pathway; F:calcium ion binding; P:cell differentiation; F:Notch binding; P:regulation of cell proliferation
Cflo_00948--XP_001120865.1_APIME	1196	kmr23_comp64147_c0_seq1	571	136	0.706	5.96035e-45	0.11	0.73	EFN68210	hypothetical protein EAG_13121 [Camponotus floridanus]
Cflo_01104--XP_392395.3_APIME	309	kmr23_comp42560_c1_seq1	408	112	0.973	2.59542e-65	0.36	0.82	EFN68366	Cyclic nucleotide-gated channel cone photoreceptor subunit alpha [Camponotus floridanus]	3	F:GO:0005216; P:GO:0034220; C:GO:0016021	F:ion channel activity; P:ion transmembrane transport; C:integral component of membrane
Cflo_01307--NA	197	kmr23_comp52063_c2_seq1	340	104	0.894	4.5377e-42	0.53	0.93	EFN65643	hypothetical protein EAG_10900 [Camponotus floridanus]	1	C:GO:0016021	C:integral component of membrane
Cflo_01326--NA	229	kmr23_comp130393_c0_seq1	275	42	0.929	6.27243e-21	0.18	0.46	EFN65662	hypothetical protein EAG_10919 [Camponotus floridanus]
Cflo_01372--XP_623768.1_APIME	491	kmr23_comp68703_c0_seq1	1485	411	0.964	0	0.84	0.83	EFN65708	Dipeptidase 1 [Camponotus floridanus]	6	F:GO:0046872; F:GO:0016805; P:GO:0006508; C:GO:0016021; C:GO:0031225; F:GO:0008237	F:metal ion binding; F:dipeptidase activity; P:proteolysis; C:integral component of membrane; C:anchored component of membrane; F:metallopeptidase activity	EC:3.4.13	Acting on peptide bonds (peptidases)
Cflo_01405--NA	369	kmr23_comp63913_c2_seq1	1234	239	0.812	9.56301e-71	0.65	0.56	EFN71099	hypothetical protein EAG_06254 [Camponotus floridanus]
Cflo_01436--NA	150	kmr23_comp121100_c0_seq1	430	19	0.895	0.000897755	0.13	0.13	EFN62223	hypothetical protein EAG_12386 [Camponotus floridanus]
Cflo_01437--NA	258	kmr23_comp151323_c0_seq1	267	40	0.85	7.36384e-16	0.16	0.45	EFN62224	hypothetical protein EAG_12387 [Camponotus floridanus]
Cflo_01468--NA	188	kmr27_comp86482_c0_seq2	650	48	0.708	1.02758e-12	0.26	0.22	EFN62255	hypothetical protein EAG_12418 [Camponotus floridanus]
Cflo_01471--NA	193	kmr29_comp95606_c3_seq8	1140	59	0.915	1.0861e-10	0.31	0.16	EFN62258	hypothetical protein EAG_12421 [Camponotus floridanus]
Cflo_01700--XP_001121872.1_APIME	209	kmr27_comp82283_c2_seq2	862	175	0.949	2.96085e-123	0.84	0.61	EFN74010	Titin [Camponotus floridanus]	1	C:GO:0016021	C:integral component of membrane
Cflo_01703--NP_001014983.1_APIME	285	kmr23_comp62816_c0_seq1	516	137	0.847	1.14547e-51	0.48	0.81	EFN74013	Dopamine D2-like receptor [Camponotus floridanus]	3	F:GO:0004930; P:GO:0007186; C:GO:0016021	F:G-protein coupled receptor activity; P:G-protein coupled receptor signaling pathway; C:integral component of membrane
Cflo_01706--NP_001014983.1_APIME	439	kmr23_comp127918_c0_seq1	394	111	1	1.93027e-51	0.25	0.85	EFN74016	Dopamine D2-like receptor [Camponotus floridanus]	3	F:GO:0004930; P:GO:0007186; C:GO:0016021	F:G-protein coupled receptor activity; P:G-protein coupled receptor signaling pathway; C:integral component of membrane
Cflo_01748--XP_001122125.1_APIME	218	kmr23_comp143652_c0_seq1	313	105	0.905	1.22977e-64	0.48	1	EFN73781	hypothetical protein EAG_06423 [Camponotus floridanus]
Cflo_01884--NA	408	kmr23_comp132189_c0_seq1	251	55	0.8	9.9075e-25	0.13	0.66	EFN64165	hypothetical protein EAG_08267 [Camponotus floridanus]
Cflo_01935--XP_624891.2_APIME	148	kmr25_comp79271_c2_seq1	1133	147	0.959	4.55527e-99	0.99	0.39	EFN65919	Kinesin-like protein KIF16B [Camponotus floridanus]	5	F:GO:0005524; F:GO:0003777; P:GO:0072383; C:GO:0005874; F:GO:0008017	F:ATP binding; F:microtubule motor activity; P:plus-end-directed vesicle transport along microtubule; C:microtubule; F:microtubule binding	EC:3.6.1.15	Nucleoside-triphosphate phosphatase
Cflo_01943--NA	574	kmr23_comp58746_c0_seq1	244	69	0.942	8.4595e-38	0.12	0.85	EFN65925	hypothetical protein EAG_09230 [Camponotus floridanus]
Cflo_02016--NA	170	kmr23_comp129778_c0_seq1	373	50	0.92	1.5868e-28	0.29	0.4	EFN74215	hypothetical protein EAG_14127 [Camponotus floridanus]
Cflo_02069--XP_624040.2_APIME	732	kmr23_comp63157_c0_seq1	556	185	0.995	1.88687e-130	0.25	1	EFN70375	GDNF family receptor alpha-3 [Camponotus floridanus]
Cflo_02072--XP_001121326.1_APIME	538	kmr29_comp75245_c1_seq1	375	92	0.772	1.92982e-42	0.17	0.74	EFN70378	Putative gustatory receptor 43a [Camponotus floridanus]	3	P:GO:0050909; C:GO:0016021; C:GO:0005886	P:sensory perception of taste; C:integral component of membrane; C:plasma membrane
Cflo_02084--XP_393275.3_APIME	651	kmr23_comp120842_c0_seq1	727	404	0.728	7.54002e-154	0.62	1	EFN68763	EGF-like, fibronectin type-III and laminin G-like domain-containing protein [Camponotus floridanus]	1	F:GO:0005509	F:calcium ion binding
Cflo_02119--XP_001121543.1_APIME	666	kmr23_comp60681_c0_seq1	230	75	0.893	1.64557e-38	0.11	0.99	EFN68797	hypothetical protein EAG_15877 [Camponotus floridanus]
Cflo_02196--XP_396385.3_APIME	527	kmr25_comp78183_c1_seq1	1441	440	0.991	0	0.83	0.92	EFN67851	Potassium voltage-gated channel protein Shaw [Camponotus floridanus]	5	F:GO:0005249; P:GO:0071805; C:GO:0008076; P:GO:0034765; P:GO:0051260	F:voltage-gated potassium channel activity; P:potassium ion transmembrane transport; C:voltage-gated potassium channel complex; P:regulation of ion transmembrane transport; P:protein homooligomerization
Cflo_02223--NA	193	kmr23_comp97222_c0_seq1	940	187	0.781	1.86739e-96	0.97	0.68	EFN67878	hypothetical protein EAG_07376 [Camponotus floridanus]
Cflo_02364--XP_001120960.1_APIME	65	kmr25_comp83587_c1_seq4	954	65	0.969	8.35739e-20	1	0.2	EFN67502	hypothetical protein EAG_02889 [Camponotus floridanus]
Cflo_02367--XP_392464.3_APIME	561	kmr25_comp81790_c1_seq1	1203	312	0.958	4.98371e-175	0.56	0.78	EFN67505	High-affinity choline transporter 1 [Camponotus floridanus]	3	P:GO:0055085; C:GO:0016021; F:GO:0005215	P:transmembrane transport; C:integral component of membrane; F:transporter activity
Cflo_02505--XP_394294.2_APIME	446	kmr23_comp46396_c0_seq1	530	150	0.973	1.63621e-99	0.34	0.85	EFN73488	Retinal homeobox protein Rx2 [Camponotus floridanus]	5	C:GO:0005634; P:GO:0006351; P:GO:0007275; P:GO:0006355; F:GO:0043565	C:nucleus; P:transcription, DNA-templated; P:multicellular organism development; P:regulation of transcription, DNA-templated; F:sequence-specific DNA binding
Cflo_02506--NA	235	kmr25_comp85485_c2_seq1	3794	75	0.84	9.11962e-37	0.32	0.06	EFN73489	hypothetical protein EAG_09506 [Camponotus floridanus]	1	C:GO:0016021	C:integral component of membrane
Cflo_02522--XP_001122248.1_APIME	299	kmr23_comp40016_c1_seq1	410	135	0.956	4.10212e-79	0.45	0.99	EFN73505	Neuropeptides capa receptor [Camponotus floridanus]	3	F:GO:0004930; P:GO:0007218; C:GO:0016021	F:G-protein coupled receptor activity; P:neuropeptide signaling pathway; C:integral component of membrane
Cflo_02525--XP_393969.1_APIME	494	kmr27_comp87131_c0_seq2	1766	494	0.818	0	1	0.84	EFN73507	Cytochrome P450 9e2 [Camponotus floridanus]	6	F:GO:0005506; F:GO:0016705; C:GO:0016021; P:GO:0055114; F:GO:0004497; F:GO:0020037	F:iron ion binding; F:oxidoreductase activity, acting on paired donors, with incorporation or reduction of molecular oxygen; C:integral component of membrane; P:oxidation-reduction process; F:monooxygenase activity; F:heme binding
Cflo_02626--XP_624238.1_APIME	138	kmr25_comp79409_c2_seq1	196	52	0.962	3.3058e-27	0.38	0.8	EFN68110	hypothetical protein EAG_10694 [Camponotus floridanus]	1	C:GO:0016021	C:integral component of membrane
Cflo_02671--NA	295	kmr23_comp31047_c0_seq1	270	51	0.765	1.1351e-18	0.17	0.57	EFN64994	hypothetical protein EAG_08532 [Camponotus floridanus]
Cflo_02700--NA	100	kmr23_comp117629_c0_seq1	708	28	0.786	5.9609e-07	0.28	0.12	EFN62542	hypothetical protein EAG_13857 [Camponotus floridanus]
Cflo_02713--XP_001121839.1_APIME	207	kmr25_comp54763_c1_seq1	1060	155	0.916	8.71989e-79	0.75	0.44	EFN62554	hypothetical protein EAG_13870 [Camponotus floridanus]	2	C:GO:0016020; C:GO:0016021	C:membrane; C:integral component of membrane
Cflo_02751--NA	311	kmr29_comp225578_c0_seq1	289	47	0.957	1.04703e-25	0.15	0.49	EFN61637	hypothetical protein EAG_05941 [Camponotus floridanus]
Cflo_02755--NA	690	kmr23_comp150749_c0_seq1	267	46	0.978	8.06519e-22	0.07	0.52	EFN61641	hypothetical protein EAG_05945 [Camponotus floridanus]
Cflo_02757--NA	497	kmr23_comp29731_c0_seq1	350	80	0.762	1.84274e-28	0.16	0.69	EFN61643	hypothetical protein EAG_05947 [Camponotus floridanus]
Cflo_02863--NP_001011623.1_APIME	196	kmr23_comp68020_c2_seq1	284	88	0.932	1.14675e-54	0.45	0.94	EFN62788	Metabotropic glutamate receptor 2 [Camponotus floridanus]	3	F:GO:0004930; P:GO:0007186; C:GO:0016021	F:G-protein coupled receptor activity; P:G-protein coupled receptor signaling pathway; C:integral component of membrane
Cflo_02869--NA	343	kmr23_comp176872_c0_seq1	125	37	1	2.78733e-17	0.11	0.9	EFN62794	hypothetical protein EAG_09790 [Camponotus floridanus]
Cflo_02872--NA	225	kmr23_comp62716_c1_seq1	263	76	0.803	4.88398e-27	0.34	0.87	EFN62797	hypothetical protein EAG_09793 [Camponotus floridanus]
Cflo_02940--XP_001121864.1_APIME	137	kmr23_comp62840_c0_seq1	197	54	0.796	4.14755e-26	0.39	0.83	EFN67335	hypothetical protein EAG_04796 [Camponotus floridanus]	1	C:GO:0016021	C:integral component of membrane
Cflo_02941--XP_001121864.1_APIME	137	kmr23_comp149116_c0_seq1	222	42	0.929	1.61393e-21	0.31	0.57	EFN67336	hypothetical protein EAG_04797 [Camponotus floridanus]	4	F:GO:0005549; C:GO:0016021; P:GO:0050911; F:GO:0004984	F:odorant binding; C:integral component of membrane; P:detection of chemical stimulus involved in sensory perception of smell; F:olfactory receptor activity
Cflo_02942--XP_001121864.1_APIME	364	kmr23_comp14562_c0_seq1	140	46	0.935	9.06133e-23	0.13	1	EFN67337	hypothetical protein EAG_04798 [Camponotus floridanus]	4	F:GO:0005549; C:GO:0016021; P:GO:0050911; F:GO:0004984	F:odorant binding; C:integral component of membrane; P:detection of chemical stimulus involved in sensory perception of smell; F:olfactory receptor activity
Cflo_02975--NA	650	kmr23_comp64622_c2_seq1	846	65	0.938	2.49663e-18	0.1	0.23	EFN67369	hypothetical protein EAG_04831 [Camponotus floridanus]
Cflo_03059--XP_393919.2_APIME	143	kmr23_comp67643_c2_seq1	356	118	0.983	8.90752e-82	0.83	1	EFN73201	hypothetical protein EAG_05327 [Camponotus floridanus]
Cflo_03157--XP_395215.3_APIME	1060	kmr27_comp88932_c1_seq1	3981	1012	0.848	0	0.95	0.76	EFN61516	Protein kinase C-binding protein NELL1 [Camponotus floridanus]	3	F:GO:0005509; P:GO:0016310; F:GO:0016301	F:calcium ion binding; P:phosphorylation; F:kinase activity
Cflo_03233--XP_396266.2_APIME	405	kmr23_comp63377_c0_seq1	860	231	0.965	4.52187e-162	0.57	0.8	EFN69258	Obscurin [Camponotus floridanus]
Cflo_03379--XP_001120680.1_APIME	293	kmr23_comp67817_c0_seq1	1129	271	0.838	6.51578e-138	0.92	0.78	EFN71835	hypothetical protein EAG_13660 [Camponotus floridanus]
Cflo_03588--NA	272	kmr25_comp77068_c3_seq1	657	35	0.914	5.84261e-12	0.13	0.16	EFN74360	hypothetical protein EAG_03320 [Camponotus floridanus]
Cflo_03597--NA	341	kmr23_comp53741_c2_seq1	131	24	0.792	3.64935e-05	0.07	0.56	EFN74369	hypothetical protein EAG_03329 [Camponotus floridanus]
Cflo_03624--NA	383	kmr29_comp80036_c0_seq1	413	58	0.879	1.46136e-24	0.15	0.42	EFN63448	hypothetical protein EAG_04903 [Camponotus floridanus]
Cflo_03796--NA	229	kmr29_comp94612_c0_seq2	2679	75	0.92	2.17446e-38	0.33	0.08	EFN64209	hypothetical protein EAG_09021 [Camponotus floridanus]
Cflo_03836--XP_001606330.1_NASVI	93	kmr23_comp50140_c1_seq1	393	93	0.817	5.22902e-52	1	0.71	EFN70635	hypothetical protein EAG_03824 [Camponotus floridanus]	4	F:GO:0005549; C:GO:0016020; P:GO:0050911; F:GO:0004984	F:odorant binding; C:membrane; P:detection of chemical stimulus involved in sensory perception of smell; F:olfactory receptor activity
Cflo_03921--XP_001601260.1_NASVI	138	kmr25_comp84647_c1_seq2	791	104	0.712	6.87019e-20	0.75	0.38	EFN70419	hypothetical protein EAG_08714 [Camponotus floridanus]
Cflo_03922--XP_001121656.1_APIME	244	kmr25_comp77682_c0_seq1	1114	240	0.867	2.16611e-159	0.98	0.65	EFN70420	Hepatic triacylglycerol lipase [Camponotus floridanus]	2	C:GO:0005576; F:GO:0052689	C:extracellular region; F:carboxylic ester hydrolase activity	EC:3.1.1.1	Carboxylesterase
Cflo_03977--XP_396660.2_APIME	239	kmr23_comp54695_c0_seq1	678	215	0.949	5.5831e-111	0.9	0.96	EFN65385	Neuropeptide FF receptor 2 [Camponotus floridanus]	3	F:GO:0004930; P:GO:0007218; C:GO:0016021	F:G-protein coupled receptor activity; P:neuropeptide signaling pathway; C:integral component of membrane
Cflo_04208--NA	652	kmr23_comp143307_c0_seq1	224	49	0.796	4.80576e-16	0.08	0.68	EFN63702	hypothetical protein EAG_09628 [Camponotus floridanus]	1	C:GO:0016021	C:integral component of membrane
Cflo_04230--NA	92	kmr25_comp82556_c1_seq9	505	59	0.864	2.4123e-30	0.64	0.35	EFN63722	hypothetical protein EAG_09650 [Camponotus floridanus]
Cflo_04232--XP_394790.3_APIME	149	kmr23_comp123688_c0_seq1	288	71	0.986	7.97933e-21	0.48	0.74	EFN63724	Visual system homeobox 2 [Camponotus floridanus]	1	F:GO:0003677	F:DNA binding
Cflo_04305--NA	104	kmr25_comp85251_c1_seq1	364	47	0.936	1.09739e-16	0.45	0.39	EFN61679	hypothetical protein EAG_12683 [Camponotus floridanus]
Cflo_04466--XP_623850.2_APIME	107	kmr29_comp79071_c0_seq3	312	92	0.837	2.1825e-52	0.86	0.88	EFN66307	hypothetical protein EAG_13788 [Camponotus floridanus]	4	F:GO:0005549; C:GO:0016020; P:GO:0050911; F:GO:0004984	F:odorant binding; C:membrane; P:detection of chemical stimulus involved in sensory perception of smell; F:olfactory receptor activity
Cflo_04567--NA	112	kmr29_comp367177_c0_seq1	338	49	0.898	1.99821e-21	0.44	0.44	EFN67977	hypothetical protein EAG_10515 [Camponotus floridanus]
Cflo_04579--XP_393327.3_APIME	1283	kmr25_comp63295_c0_seq1	756	249	0.984	6.14022e-154	0.19	1	EFN67989	Rho GTPase-activating protein 100F [Camponotus floridanus]	1	P:GO:0007165	P:signal transduction
Cflo_04611--NA	367	kmr23_comp62915_c0_seq1	464	82	0.756	2.92485e-14	0.22	0.56	EFN70262	hypothetical protein EAG_11931 [Camponotus floridanus]
Cflo_04612--NA	481	kmr25_comp307205_c0_seq1	122	61	0.82	2.09891e-12	0.13	0.82	EFN70263	hypothetical protein EAG_11932 [Camponotus floridanus]
Cflo_04806--XP_395896.3_APIME	289	kmr23_comp38986_c0_seq1	607	110	0.918	8.76966e-53	0.38	0.54	EFN66652	PDF receptor [Camponotus floridanus]	4	F:GO:0004930; P:GO:0007186; C:GO:0016021; P:GO:0007166	F:G-protein coupled receptor activity; P:G-protein coupled receptor signaling pathway; C:integral component of membrane; P:cell surface receptor signaling pathway
Cflo_04815--XP_001606880.1_NASVI	462	kmr23_comp62741_c1_seq1	951	316	0.94	0	0.68	1	EFN71416	hypothetical protein EAG_14759 [Camponotus floridanus]	1	C:GO:0016021	C:integral component of membrane
Cflo_04823--NA	148	kmr25_comp83563_c1_seq1	715	55	0.8	3.54889e-20	0.37	0.22	EFN71424	hypothetical protein EAG_14767 [Camponotus floridanus]	1	C:GO:0016021	C:integral component of membrane
Cflo_04922--XP_001603889.1_NASVI	512	kmr25_comp75893_c0_seq1	675	102	0.824	1.23709e-54	0.2	0.45	EFN70964	hypothetical protein EAG_16320 [Camponotus floridanus]	3	P:GO:0050909; C:GO:0016021; C:GO:0005886	P:sensory perception of taste; C:integral component of membrane; C:plasma membrane
Cflo_05022--XP_394819.3_APIME	310	kmr27_comp89057_c2_seq1	1627	310	0.945	0	1	0.56	EFN68643	Neurotrimin [Camponotus floridanus]
Cflo_05039--XP_001123298.1_APIME	83	kmr29_comp92758_c3_seq7	707	83	0.976	2.03907e-54	1	0.35	EFN63291	Octopamine receptor beta-3R [Camponotus floridanus]	3	F:GO:0004930; P:GO:0007186; C:GO:0016021	F:G-protein coupled receptor activity; P:G-protein coupled receptor signaling pathway; C:integral component of membrane
Cflo_05050--XP_624310.1_APIME	154	kmr27_comp90941_c0_seq8	753	154	0.727	6.456e-70	1	0.6	EFN63300	Protein NPC2-like protein [Camponotus floridanus]
Cflo_05131--XP_393968.3_APIME	1617	kmr27_comp88824_c4_seq2	3389	1099	0.937	0	0.68	0.98	EFN61083	Myosin IIIA [Camponotus floridanus]	6	C:GO:0016459; F:GO:0005524; F:GO:0003779; F:GO:0004672; P:GO:0006468; F:GO:0003774	C:myosin complex; F:ATP binding; F:actin binding; F:protein kinase activity; P:protein phosphorylation; F:motor activity	EC:3.6.1.15	Nucleoside-triphosphate phosphatase
Cflo_05311--NA	274	kmr27_comp79462_c1_seq1	368	47	0.957	1.13154e-23	0.17	0.39	EFN63746	hypothetical protein EAG_12052 [Camponotus floridanus]
Cflo_05312--NA	56	kmr25_comp7782_c0_seq1	266	46	0.935	1.26777e-11	0.82	0.52	EFN63747	hypothetical protein EAG_12053 [Camponotus floridanus]
Cflo_05419--XP_396335.1_APIME	422	kmr23_comp30084_c0_seq1	892	286	0.979	7.49938e-169	0.68	0.96	EFN69671	Somatostatin receptor type 2 [Camponotus floridanus]	3	C:GO:0016021; P:GO:0038170; F:GO:0004994	C:integral component of membrane; P:somatostatin signaling pathway; F:somatostatin receptor activity
Cflo_05423--NA	62	kmr29_comp93121_c1_seq2	460	62	0.774	2.97592e-27	1	0.41	EFN69675	hypothetical protein EAG_12013 [Camponotus floridanus]
Cflo_05477--NA	132	kmr27_comp54114_c0_seq2	1761	31	0.935	1.65877e-11	0.23	0.05	EFN74802	hypothetical protein EAG_05110 [Camponotus floridanus]
Cflo_05604--NA	608	kmr25_comp66985_c0_seq1	321	44	0.886	3.20047e-17	0.07	0.41	EFN71610	hypothetical protein EAG_11599 [Camponotus floridanus]
Cflo_05610--XP_001122667.1_APIME	302	kmr31_comp5707_c0_seq1	1093	250	0.712	8.64432e-67	0.83	0.67	EFN71616	Endocuticle structural glycoprotein SgAbd-8 [Camponotus floridanus]	1	F:GO:0042302	F:structural constituent of cuticle
Cflo_05646--XP_001121912.1_APIME	476	kmr23_comp59978_c0_seq1	1691	280	0.936	5.25649e-178	0.59	0.5	EFN74309	Popeye domain-containing protein 2 [Camponotus floridanus]	1	C:GO:0016021	C:integral component of membrane
Cflo_05648--XP_393861.2_APIME	360	kmr23_comp63467_c1_seq1	1343	321	0.966	0	0.89	0.72	EFN74311	Popeye domain-containing protein 3 [Camponotus floridanus]	1	C:GO:0016021	C:integral component of membrane
Cflo_05868--XP_001605012.1_NASVI	167	kmr25_comp71697_c0_seq1	318	74	0.703	2.04869e-31	0.44	0.7	EFN73259	hypothetical protein EAG_11419 [Camponotus floridanus]	4	F:GO:0005549; C:GO:0016021; P:GO:0050911; F:GO:0004984	F:odorant binding; C:integral component of membrane; P:detection of chemical stimulus involved in sensory perception of smell; F:olfactory receptor activity
Cflo_05870--XP_001600939.1_NASVI	101	kmr25_comp71697_c0_seq1	318	74	0.797	3.88609e-38	0.73	0.7	EFN73261	hypothetical protein EAG_11421 [Camponotus floridanus]	4	F:GO:0005549; C:GO:0016021; P:GO:0050911; F:GO:0004984	F:odorant binding; C:integral component of membrane; P:detection of chemical stimulus involved in sensory perception of smell; F:olfactory receptor activity
Cflo_06009--XP_623443.2_APIME	478	kmr23_comp69444_c4_seq1	2311	478	0.862	0	1	0.62	EFN69046	Glucose dehydrogenase [acceptor] [Camponotus floridanus]	3	F:GO:0016614; F:GO:0050660; P:GO:0055114	F:oxidoreductase activity, acting on CH-OH group of donors; F:flavin adenine dinucleotide binding; P:oxidation-reduction process
Cflo_06094--NA	203	kmr23_comp183208_c0_seq1	212	35	1	1.00266e-18	0.17	0.5	EFN69894	hypothetical protein EAG_10856 [Camponotus floridanus]
Cflo_06118--NA	193	kmr23_comp176654_c0_seq1	223	56	0.804	1.17043e-23	0.29	0.76	EFN66041	hypothetical protein EAG_14539 [Camponotus floridanus]
Cflo_06179--XP_001122246.1_APIME	896	kmr27_comp90469_c0_seq1	2680	827	0.935	0	0.92	0.91	EFN73315	Adenylate cyclase type 5 [Camponotus floridanus]	7	F:GO:0000166; P:GO:0006171; C:GO:0016021; C:GO:0005622; C:GO:0005886; F:GO:0004016; P:GO:0035556	F:nucleotide binding; P:cAMP biosynthetic process; C:integral component of membrane; C:intracellular; C:plasma membrane; F:adenylate cyclase activity; P:intracellular signal transduction	EC:4.6.1.1	Adenylate cyclase
Cflo_06294--XP_624813.2_APIME	245	kmr27_comp90529_c1_seq4	1782	241	0.705	2.08303e-120	0.98	0.42	EFN71151	Mite allergen Der p 3 [Camponotus floridanus]	2	P:GO:0006508; F:GO:0004252	P:proteolysis; F:serine-type endopeptidase activity	EC:3.4.21	Acting on peptide bonds (peptidases)
Cflo_06463--XP_394673.2_APIME	725	kmr29_comp95444_c0_seq11	2278	393	0.949	0	0.54	0.56	EFN66716	Orphan sodium- and chloride-dependent neurotransmitter transporter NTT73 [Camponotus floridanus]	4	P:GO:0006836; F:GO:0005328; P:GO:0055085; C:GO:0016021	P:neurotransmitter transport; F:neurotransmitter:sodium symporter activity; P:transmembrane transport; C:integral component of membrane
Cflo_06497--NA	54	kmr29_comp93121_c1_seq2	460	54	0.759	5.79351e-23	1	0.35	EFN62631	hypothetical protein EAG_16373 [Camponotus floridanus]
Cflo_06627--XP_395444.2_APIME	498	kmr23_comp60429_c1_seq1	936	299	0.806	1.60619e-169	0.6	0.96	EFN64606	Lactase-phlorizin hydrolase [Camponotus floridanus]	2	P:GO:0005975; F:GO:0004553	P:carbohydrate metabolic process; F:hydrolase activity, hydrolyzing O-glycosyl compounds
Cflo_06742--XP_393412.3_APIME	67	kmr25_comp75337_c1_seq1	584	67	0.731	7.49027e-15	1	0.36	EFN66226	hypothetical protein EAG_05032 [Camponotus floridanus]
Cflo_06764--NA	47	kmr29_comp93121_c1_seq2	460	47	0.809	8.63417e-19	1	0.31	EFN60973	hypothetical protein EAG_13905 [Camponotus floridanus]
Cflo_06775--XP_001121769.1_APIME	257	kmr27_comp90880_c6_seq1	2087	257	0.825	5.951e-103	1	0.37	EFN64640	hypothetical protein EAG_08283 [Camponotus floridanus]	1	C:GO:0016021	C:integral component of membrane
Cflo_06834--XP_001122546.1_APIME	767	kmr23_comp62223_c0_seq1	883	176	0.96	5.87286e-101	0.23	0.6	EFN69973	Coiled-coil domain-containing protein C6orf97 [Camponotus floridanus]
Cflo_06898--NA	277	kmr25_comp85943_c4_seq27	723	173	0.96	1.18587e-111	0.62	0.72	EFN63589	hypothetical protein EAG_04863 [Camponotus floridanus]
Cflo_07004--XP_392879.1_APIME	279	kmr23_comp35769_c0_seq1	546	182	0.978	2.50282e-129	0.65	0.98	EFN68547	Ras-related protein Rab-8A [Camponotus floridanus]	3	F:GO:0005525; P:GO:0007264; C:GO:0005622	F:GTP binding; P:small GTPase mediated signal transduction; C:intracellular
Cflo_07100--XP_394796.3_APIME	170	kmr25_comp81251_c2_seq1	733	142	0.944	6.88041e-92	0.84	0.59	EFN65348	Neuroligin-4, Y-linked [Camponotus floridanus]
Cflo_07457--XP_001122075.1_APIME	406	kmr23_comp60546_c1_seq1	554	184	0.957	4.54566e-127	0.45	1	EFN71486	Alpha-2C adrenergic receptor [Camponotus floridanus]	3	F:GO:0004930; P:GO:0007186; C:GO:0016021	F:G-protein coupled receptor activity; P:G-protein coupled receptor signaling pathway; C:integral component of membrane
Cflo_07562--XP_001121152.1_APIME	1064	kmr27_comp90531_c1_seq89	2128	626	0.78	0	0.59	0.88	EFN70086	Chitin synthase 8 [Camponotus floridanus]	2	F:GO:0016758; C:GO:0016021	F:transferase activity, transferring hexosyl groups; C:integral component of membrane
Cflo_07623--NA	189	kmr23_comp50623_c1_seq1	192	57	0.93	1.0304e-14	0.3	0.89	EFN61835	hypothetical protein EAG_10742 [Camponotus floridanus]
Cflo_07626--NP_001011594.1_APIME	400	kmr25_comp76581_c1_seq2	541	176	0.994	1.145e-111	0.44	0.98	EFN61838	Probable G-protein coupled receptor No18 [Camponotus floridanus]	3	P:GO:0007186; F:GO:0004989; C:GO:0016021	P:G-protein coupled receptor signaling pathway; F:octopamine receptor activity; C:integral component of membrane
Cflo_07694--NA	265	kmr23_comp121538_c0_seq1	286	47	0.787	8.19062e-17	0.18	0.49	EFN66345	hypothetical protein EAG_07089 [Camponotus floridanus]
Cflo_07783--XP_623849.2_APIME	1138	kmr23_comp68680_c1_seq1	1092	365	0.901	0	0.32	1	EFN75052	Voltage-dependent calcium channel subunit alpha-2/delta-3 [Camponotus floridanus]	1	C:GO:0016021	C:integral component of membrane
Cflo_07930--XP_001120109.1_APIME	361	kmr25_comp85015_c5_seq1	801	69	0.986	2.83008e-39	0.19	0.26	EFN61329	Neurexin-2-alpha [Camponotus floridanus]
Cflo_08301--XP_001121148.1_APIME	107	kmr23_comp48667_c0_seq1	330	78	0.962	1.62154e-47	0.73	0.71	EFN69952	Insulin-like growth factor-binding protein 7 [Camponotus floridanus]	3	P:GO:0001558; C:GO:0005576; F:GO:0005520	P:regulation of cell growth; C:extracellular region; F:insulin-like growth factor binding
Cflo_08304--XP_001599249.1_NASVI	472	kmr25_comp86057_c0_seq3	1297	264	0.705	8.52099e-130	0.56	0.6	EFN64222	hypothetical protein EAG_04529 [Camponotus floridanus]
Cflo_08319--NA	61	kmr25_comp65216_c0_seq1	939	61	0.934	2.09584e-32	1	0.19	EFN74380	hypothetical protein EAG_14797 [Camponotus floridanus]
Cflo_08370--XP_001122516.1_APIME	119	kmr23_comp129566_c0_seq1	703	118	0.915	1.07546e-77	0.99	0.5	EFN69186	Venom allergen 3 [Camponotus floridanus]	1	C:GO:0005576	C:extracellular region
Cflo_08372--NP_001035320.1_APIME	401	kmr23_comp67201_c1_seq1	1729	285	0.888	4.86917e-179	0.71	0.49	EFN69188	Acetylcholinesterase [Camponotus floridanus]	3	C:GO:0043083; P:GO:0001507; F:GO:0003990	C:synaptic cleft; P:acetylcholine catabolic process in synaptic cleft; F:acetylcholinesterase activity	EC:3.1.1.8; EC:3.1.1.7; EC:3.1.1.1	Cholinesterase; Acetylcholinesterase; Carboxylesterase
Cflo_08409--NA	87	kmr25_comp84058_c5_seq1	2267	87	0.805	1.12492e-22	1	0.11	EFN64094	hypothetical protein EAG_02354 [Camponotus floridanus]
Cflo_08415--XP_393267.2_APIME	82	kmr29_comp95742_c1_seq6	1925	77	0.909	6.50385e-44	0.94	0.12	EFN64100	Testican-2 [Camponotus floridanus]	3	P:GO:0007165; F:GO:0005509; C:GO:0005578	P:signal transduction; F:calcium ion binding; C:proteinaceous extracellular matrix
Cflo_08420--NA	52	kmr23_comp31047_c0_seq1	270	52	0.712	6.88113e-18	1	0.58	EFN68517	hypothetical protein EAG_09946 [Camponotus floridanus]	2	F:GO:0003676; F:GO:0046983	F:nucleic acid binding; F:protein dimerization activity
Cflo_08437--XP_001122237.1_APIME	451	kmr29_comp91552_c0_seq1	1723	451	0.716	0	1	0.79	EFN68533	Solute carrier family 2, facilitated glucose transporter member 8 [Camponotus floridanus]	4	F:GO:0022891; P:GO:0055085; C:GO:0016021; P:GO:0008643	F:substrate-specific transmembrane transporter activity; P:transmembrane transport; C:integral component of membrane; P:carbohydrate transport
Cflo_08571--NA	103	kmr27_comp54257_c0_seq1	235	36	0.944	4.27636e-14	0.35	0.46	EFN60858	hypothetical protein EAG_12334 [Camponotus floridanus]
Cflo_08572--NA	241	kmr23_comp64308_c1_seq1	398	30	0.8	2.46829e-19	0.12	0.23	EFN60859	hypothetical protein EAG_12335 [Camponotus floridanus]
Cflo_08606--XP_001120433.1_APIME	69	kmr27_comp86192_c1_seq4	330	69	0.913	1.32856e-36	1	0.64	EFN61666	hypothetical protein EAG_09237 [Camponotus floridanus]	1	C:GO:0016021	C:integral component of membrane
Cflo_08782--NA	64	kmr23_comp58841_c2_seq1	844	62	0.726	6.0684e-24	0.97	0.22	EFN65445	hypothetical protein EAG_00230 [Camponotus floridanus]
Cflo_08812--XP_394160.2_APIME	567	kmr23_comp69813_c0_seq1	3536	567	0.854	0	1	0.48	EFN74893	Sodium-coupled monocarboxylate transporter 1 [Camponotus floridanus]	3	P:GO:0055085; C:GO:0016021; F:GO:0005215	P:transmembrane transport; C:integral component of membrane; F:transporter activity
Cflo_08893--NA	240	kmr23_comp58504_c1_seq1	356	41	0.829	1.48166e-13	0.17	0.35	EFN61723	hypothetical protein EAG_05860 [Camponotus floridanus]
Cflo_08897--XP_624568.1_APIME	635	kmr23_comp57156_c0_seq1	287	95	0.895	4.04626e-50	0.15	1	EFN61726	Leucine-rich repeat, immunoglobulin-like domain and transmembrane domain-containing protein 2 [Camponotus floridanus]	1	C:GO:0016021	C:integral component of membrane
Cflo_08925--NA	54	kmr23_comp31047_c0_seq1	270	54	0.741	2.35886e-21	1	0.6	EFN74678	hypothetical protein EAG_10205 [Camponotus floridanus]	2	F:GO:0003676; F:GO:0046983	F:nucleic acid binding; F:protein dimerization activity
Cflo_09013--NA	345	kmr23_comp31047_c0_seq1	270	45	0.756	5.9606e-13	0.13	0.5	EFN64037	hypothetical protein EAG_04911 [Camponotus floridanus]	2	F:GO:0003676; F:GO:0046983	F:nucleic acid binding; F:protein dimerization activity
Cflo_09015--NA	157	kmr27_comp8167_c1_seq1	182	43	0.744	2.0767e-12	0.27	0.73	EFN64039	hypothetical protein EAG_04913 [Camponotus floridanus]
Cflo_09018--XP_396227.3_APIME	816	kmr23_comp62443_c5_seq1	1419	472	0.909	0	0.58	1	EFN72190	Peroxidasin [Camponotus floridanus]	6	F:GO:0004601; P:GO:0006979; C:GO:0016021; P:GO:0098869; P:GO:0055114; F:GO:0020037	F:peroxidase activity; P:response to oxidative stress; C:integral component of membrane; P:cellular oxidant detoxification; P:oxidation-reduction process; F:heme binding	EC:1.11.1.7	Peroxidase
Cflo_09227--NA	139	kmr23_comp737_c0_seq1	135	36	0.861	1.09457e-14	0.26	0.8	EFN62218	hypothetical protein EAG_10620 [Camponotus floridanus]
Cflo_09236--XP_623783.1_APIME	157	kmr29_comp92920_c5_seq1	1345	157	1	1.34052e-109	1	0.35	EFN65954	Frequenin-1 [Camponotus floridanus]	1	F:GO:0005509	F:calcium ion binding
Cflo_09264--NA	52	kmr23_comp31047_c0_seq1	270	52	0.827	2.90151e-24	1	0.58	EFN69440	hypothetical protein EAG_12447 [Camponotus floridanus]	2	F:GO:0003676; F:GO:0046983	F:nucleic acid binding; F:protein dimerization activity
Cflo_09304--XP_394200.1_APIME	552	kmr23_comp68826_c0_seq1	963	230	0.943	6.63463e-153	0.42	0.72	EFN69524	Transcriptional repressor scratch 2 [Camponotus floridanus]	2	F:GO:0003676; F:GO:0046872	F:nucleic acid binding; F:metal ion binding
Cflo_09305--XP_001121064.1_APIME	458	kmr29_comp95769_c10_seq1	1547	225	0.951	1.10492e-121	0.49	0.45	EFN69525	Transcriptional repressor scratch 1 [Camponotus floridanus]	2	F:GO:0003676; F:GO:0046872	F:nucleic acid binding; F:metal ion binding
Cflo_09373--NA	58	kmr23_comp31047_c0_seq1	270	58	0.724	1.12545e-22	1	0.64	EFN65235	hypothetical protein EAG_01860 [Camponotus floridanus]	2	F:GO:0003676; F:GO:0046983	F:nucleic acid binding; F:protein dimerization activity
Cflo_09442--XP_001121114.1_APIME	1220	kmr23_comp38804_c0_seq1	268	87	0.897	1.95302e-46	0.07	1	EFN74624	Atrial natriuretic peptide-converting enzyme [Camponotus floridanus]	5	C:GO:0016020; P:GO:0006508; F:GO:0004252; F:GO:0005044; P:GO:0006898	C:membrane; P:proteolysis; F:serine-type endopeptidase activity; F:scavenger receptor activity; P:receptor-mediated endocytosis	EC:3.4.21	Acting on peptide bonds (peptidases)
Cflo_09459--NA	52	kmr23_comp31047_c0_seq1	270	52	0.75	4.33895e-20	1	0.58	EFN70298	hypothetical protein EAG_05506 [Camponotus floridanus]	2	F:GO:0003676; F:GO:0046983	F:nucleic acid binding; F:protein dimerization activity
Cflo_09485--NA	477	kmr23_comp129423_c0_seq1	405	50	0.88	1.72551e-33	0.1	0.37	EFN68852	hypothetical protein EAG_07918 [Camponotus floridanus]
Cflo_09588--NA	263	kmr23_comp62745_c0_seq1	1064	98	0.939	6.06615e-58	0.37	0.28	EFN74112	hypothetical protein EAG_05057 [Camponotus floridanus]	1	C:GO:0016021	C:integral component of membrane
Cflo_09671--XP_397561.2_APIME	1382	kmr27_comp91465_c0_seq1	4570	1211	0.921	0	0.88	0.8	EFN69634	Retinal guanylyl cyclase 2 [Camponotus floridanus]	8	F:GO:0005524; P:GO:0006182; C:GO:0016021; F:GO:0004383; F:GO:0004672; P:GO:0006468; C:GO:0005622; P:GO:0035556	F:ATP binding; P:cGMP biosynthetic process; C:integral component of membrane; F:guanylate cyclase activity; F:protein kinase activity; P:protein phosphorylation; C:intracellular; P:intracellular signal transduction	EC:4.6.1.2	Guanylate cyclase
Cflo_09734--XP_394423.3_APIME	551	kmr23_comp54668_c0_seq1	1532	456	0.98	0	0.83	0.89	EFN65558	Histidine decarboxylase [Camponotus floridanus]	3	F:GO:0030170; P:GO:0006520; F:GO:0016831	F:pyridoxal phosphate binding; P:cellular amino acid metabolic process; F:carboxy-lyase activity
Cflo_09834--XP_001120657.1_APIME	137	kmr25_comp85869_c0_seq1	3017	119	0.714	2.43844e-53	0.87	0.25	EFN61026	hypothetical protein EAG_14357 [Camponotus floridanus] >gi|307167863|gb|EFN61270.1| hypothetical protein EAG_00274 [Camponotus floridanus]	4	F:GO:0004930; P:GO:0007186; C:GO:0016020; P:GO:0006950	F:G-protein coupled receptor activity; P:G-protein coupled receptor signaling pathway; C:membrane; P:response to stress
Cflo_10045--XP_001120837.1_APIME	202	kmr27_comp46913_c0_seq1	356	107	0.972	6.22791e-72	0.53	0.91	EFN68024	Longitudinals lacking protein, isoform G [Camponotus floridanus]	1	F:GO:0046872	F:metal ion binding
Cflo_10184--NA	89	kmr29_comp87797_c2_seq1	541	46	0.913	4.28469e-27	0.52	0.26	EFN65039	hypothetical protein EAG_07656 [Camponotus floridanus]
Cflo_10223--XP_001121825.1_APIME	494	kmr23_comp31284_c0_seq1	600	173	0.96	7.13204e-82	0.35	0.87	EFN74403	Forkhead box protein F2 [Camponotus floridanus]	3	F:GO:0003700; P:GO:0006355; F:GO:0043565	F:transcription factor activity, sequence-specific DNA binding; P:regulation of transcription, DNA-templated; F:sequence-specific DNA binding
Cflo_10227--XP_394201.2_APIME	173	kmr23_comp130426_c0_seq1	389	124	0.815	1.03335e-46	0.72	0.95	EFN63685	hypothetical protein EAG_13549 [Camponotus floridanus]	1	F:GO:0046872	F:metal ion binding
Cflo_10283--XP_393071.2_APIME	819	kmr29_comp83702_c0_seq1	1304	432	0.947	0	0.53	1	EFN61492	Probable cationic amino acid transporter [Camponotus floridanus]	3	C:GO:0016021; F:GO:0015171; P:GO:0003333	C:integral component of membrane; F:amino acid transmembrane transporter activity; P:amino acid transmembrane transport
Cflo_10289--XP_001121187.1_APIME	296	kmr25_comp85849_c0_seq25	831	153	0.902	5.21251e-84	0.52	0.55	EFN61861	Photoreceptor-specific nuclear receptor [Camponotus floridanus]	8	C:GO:0005634; F:GO:0003700; F:GO:0008270; P:GO:0006351; F:GO:0003707; P:GO:0006355; F:GO:0043565; P:GO:0043401	C:nucleus; F:transcription factor activity, sequence-specific DNA binding; F:zinc ion binding; P:transcription, DNA-templated; F:steroid hormone receptor activity; P:regulation of transcription, DNA-templated; F:sequence-specific DNA binding; P:steroid hormone mediated signaling pathway
Cflo_10296--XP_394125.3_APIME	201	kmr23_comp185008_c0_seq1	293	97	0.99	1.21962e-65	0.48	1	EFN68501	Homeotic protein proboscipedia [Camponotus floridanus]	3	F:GO:0003677; F:GO:0003700; P:GO:0006355	F:DNA binding; F:transcription factor activity, sequence-specific DNA binding; P:regulation of transcription, DNA-templated
Cflo_10336--XP_623785.2_APIME	267	kmr23_comp69403_c4_seq1	644	173	0.942	8.34679e-117	0.65	0.81	EFN68979	Regulating synaptic membrane exocytosis protein 1 [Camponotus floridanus]
Cflo_10337--XP_001600853.1_NASVI	175	kmr23_comp62587_c0_seq1	208	69	0.986	1.18058e-41	0.39	1	EFN68980	hypothetical protein EAG_07591 [Camponotus floridanus]	1	F:GO:0008270	F:zinc ion binding
Cflo_10359--NP_001013377.1_APIME	390	kmr29_comp92634_c0_seq1	1557	390	0.869	0	1	0.78	EFN60591	Lysosomal acid phosphatase [Camponotus floridanus]	3	C:GO:0016021; P:GO:0016311; F:GO:0003993	C:integral component of membrane; P:dephosphorylation; F:acid phosphatase activity	EC:3.1.3.41; EC:3.1.3.2	4-nitrophenylphosphatase; Acid phosphatase
Cflo_10457--XP_001599531.1_NASVI	179	kmr23_comp51469_c0_seq1	109	36	0.806	1.41374e-11	0.2	1	EFN65815	hypothetical protein EAG_04640 [Camponotus floridanus]	1	C:GO:0016021	C:integral component of membrane
Cflo_10553--XP_395079.2_APIME	277	kmr27_comp87693_c2_seq2	721	158	0.741	1.19095e-78	0.57	0.67	EFN63482	Lipase member H-A [Camponotus floridanus]	2	C:GO:0005576; F:GO:0052689	C:extracellular region; F:carboxylic ester hydrolase activity	EC:3.1.1.1	Carboxylesterase
Cflo_10556--XP_624897.2_APIME	574	kmr29_comp88032_c2_seq1	1004	261	0.839	1.04773e-113	0.45	0.8	EFN63485	5-hydroxytryptamine receptor 2B [Camponotus floridanus]	3	F:GO:0004930; P:GO:0007186; C:GO:0016021	F:G-protein coupled receptor activity; P:G-protein coupled receptor signaling pathway; C:integral component of membrane
Cflo_10558--XP_001122425.1_APIME	82	kmr23_comp67683_c2_seq1	440	57	0.965	2.62709e-22	0.7	0.39	EFN63487	hypothetical protein EAG_01895 [Camponotus floridanus]	3	F:GO:0004930; P:GO:0007186; C:GO:0016021	F:G-protein coupled receptor activity; P:G-protein coupled receptor signaling pathway; C:integral component of membrane
Cflo_10576--NA	1012	kmr29_comp92469_c0_seq1	1909	603	0.72	0	0.6	0.98	EFN69230	hypothetical protein EAG_12374 [Camponotus floridanus]
Cflo_10583--NA	577	kmr23_comp38724_c0_seq1	254	51	0.804	4.44541e-19	0.09	0.61	EFN63995	hypothetical protein EAG_05481 [Camponotus floridanus]
Cflo_10696--NA	455	kmr23_comp51897_c0_seq1	218	42	0.762	3.10066e-14	0.09	0.64	EFN73320	hypothetical protein EAG_02559 [Camponotus floridanus]
Cflo_10822--NA	386	kmr23_comp57566_c1_seq1	215	62	0.919	4.13541e-31	0.16	0.87	EFN65115	hypothetical protein EAG_00924 [Camponotus floridanus]
Cflo_10827--XP_393957.3_APIME	474	kmr23_comp29610_c1_seq1	876	215	0.995	9.20777e-155	0.45	0.74	EFN70707	Acetylcholine receptor subunit beta-like 1 [Camponotus floridanus]	5	C:GO:0045211; P:GO:0098655; C:GO:0016021; C:GO:0030054; F:GO:0005230	C:postsynaptic membrane; P:cation transmembrane transport; C:integral component of membrane; C:cell junction; F:extracellular ligand-gated ion channel activity
Cflo_10828--XP_001121962.1_APIME	9679	kmr27_comp91404_c2_seq1	11067	6734	0.71	0	0.7	1	XP_003701618	PREDICTED: twitchin-like [Megachile rotundata]
Cflo_10831--XP_394827.2_APIME	410	kmr23_comp62487_c0_seq1	1141	320	0.769	0	0.78	0.84	EFN72780	Lipase 3 [Camponotus floridanus]	2	F:GO:0016788; P:GO:0016042	F:hydrolase activity, acting on ester bonds; P:lipid catabolic process
Cflo_11120--XP_001599618.1_NASVI	535	kmr23_comp70199_c20_seq1	1930	318	0.786	2.42056e-167	0.59	0.5	XP_001809187	PREDICTED: similar to predicted protein, partial [Tribolium castaneum]
Cflo_11129--XP_001599618.1_NASVI	626	kmr23_comp70199_c20_seq1	1930	567	0.727	0	0.91	0.85	XP_001601554	PREDICTED: hypothetical protein LOC100117260 [Nasonia vitripennis]
Cflo_11285--NA	54	kmr23_comp31047_c0_seq1	270	54	0.722	3.13243e-17	1	0.58	EFN60984	hypothetical protein EAG_11634 [Camponotus floridanus]	2	F:GO:0003676; F:GO:0046983	F:nucleic acid binding; F:protein dimerization activity
Cflo_11370--NA	149	kmr23_comp57131_c0_seq1	114	23	1	1.15432e-09	0.15	0.61	EFN68492	hypothetical protein EAG_01690 [Camponotus floridanus]
Cflo_11462--XP_001944114.1_ACYPI	512	kmr25_comp82612_c0_seq2	1668	503	0.708	6.71581e-130	0.98	0.87	EFN69189	hypothetical protein EAG_02999 [Camponotus floridanus]
Cflo_11649--XP_393580.2_APIME	419	kmr27_comp88872_c1_seq2	1288	273	0.941	1.18846e-168	0.65	0.64	EFN66813	Dual oxidase maturation factor 1 [Camponotus floridanus]	3	C:GO:0005789; P:GO:0015031; C:GO:0016021	C:endoplasmic reticulum membrane; P:protein transport; C:integral component of membrane
Cflo_11660--XP_001599098.1_NASVI	111	kmr23_comp31136_c0_seq1	273	55	0.764	1.40519e-20	0.5	0.71	EFN90114	hypothetical protein EAI_09460 [Harpegnathos saltator]
Cflo_11661--NA	24	kmr23_comp52845_c0_seq1	247	24	0.75	3.14818e-06	1	0.29	EFN62493	hypothetical protein EAG_04668 [Camponotus floridanus]
Cflo_11790--NA	227	kmr23_comp80681_c0_seq1	877	227	0.7	1.58121e-84	1	0.84	EFN72872	hypothetical protein EAG_06533 [Camponotus floridanus]
Cflo_11933--XP_001122281.1_APIME	109	kmr23_comp151677_c0_seq1	313	54	0.981	3.01356e-23	0.5	0.52	EFN65122	Helix-loop-helix protein 1 [Camponotus floridanus]	2	C:GO:0016021; F:GO:0046983	C:integral component of membrane; F:protein dimerization activity
Cflo_11950--NA	138	kmr27_comp91594_c1_seq2	1516	138	0.703	2.33819e-33	1	0.27	EFN64535	hypothetical protein EAG_08616 [Camponotus floridanus]
Cflo_12190--NA	65	kmr29_comp93121_c1_seq2	460	44	0.705	5.41382e-14	0.68	0.3	EFN60660	hypothetical protein EAG_14878 [Camponotus floridanus]
Cflo_12226--XP_001599618.1_NASVI	535	kmr23_comp70199_c20_seq1	1930	406	0.81	0	0.76	0.65	XP_001809187	PREDICTED: similar to predicted protein, partial [Tribolium castaneum]	1	F:GO:0003676	F:nucleic acid binding
Cflo_12330--XP_395121.3_APIME	489	kmr23_comp52681_c0_seq1	454	160	0.744	1.0149e-57	0.33	0.99	EFN63379	Sodium channel protein 60E [Camponotus floridanus]	3	P:GO:0060078; P:GO:0035725; F:GO:0005248	P:regulation of postsynaptic membrane potential; P:sodium ion transmembrane transport; F:voltage-gated sodium channel activity
Cflo_12335--XP_395896.3_APIME	68	kmr23_comp38986_c0_seq1	607	51	0.961	1.95531e-31	0.75	0.25	EFN63384	hypothetical protein EAG_08692 [Camponotus floridanus]	4	F:GO:0004930; P:GO:0007186; C:GO:0016021; P:GO:0007166	F:G-protein coupled receptor activity; P:G-protein coupled receptor signaling pathway; C:integral component of membrane; P:cell surface receptor signaling pathway
Cflo_12360--NA	60	kmr29_comp93121_c1_seq2	460	57	0.772	1.69064e-24	0.95	0.37	EFN60973	hypothetical protein EAG_13905 [Camponotus floridanus]
Cflo_12390--XP_396560.3_APIME	340	kmr23_comp57642_c2_seq1	366	164	0.854	8.06576e-83	0.48	0.99	EFN68981	Fez family zinc finger protein 1 [Camponotus floridanus]	2	F:GO:0003676; F:GO:0046872	F:nucleic acid binding; F:metal ion binding
Cflo_12442--NA	521	kmr23_comp119753_c0_seq1	687	49	0.898	8.53708e-19	0.09	0.24	EFN72524	hypothetical protein EAG_04624 [Camponotus floridanus]
Cflo_12484--XP_394081.2_APIME	469	kmr23_comp57367_c0_seq1	604	137	0.788	2.96713e-74	0.29	0.68	EFN72253	Putative odorant receptor 67a [Camponotus floridanus]	6	F:GO:0005549; P:GO:0007165; C:GO:0016021; P:GO:0050911; C:GO:0005886; F:GO:0004984	F:odorant binding; P:signal transduction; C:integral component of membrane; P:detection of chemical stimulus involved in sensory perception of smell; C:plasma membrane; F:olfactory receptor activity
Cflo_12485--XP_001600939.1_NASVI	124	kmr25_comp73811_c1_seq2	449	122	0.77	8.36579e-66	0.98	0.82	EFN72254	hypothetical protein EAG_04144 [Camponotus floridanus]	6	F:GO:0005549; P:GO:0007165; C:GO:0016021; P:GO:0050911; C:GO:0005886; F:GO:0004984	F:odorant binding; P:signal transduction; C:integral component of membrane; P:detection of chemical stimulus involved in sensory perception of smell; C:plasma membrane; F:olfactory receptor activity
Cflo_12630--NA	30	kmr29_comp93121_c1_seq2	460	29	0.759	3.64269e-09	0.97	0.19	EFN71335	hypothetical protein EAG_11066 [Camponotus floridanus]
Cflo_12713--NA	55	kmr25_comp78727_c1_seq2	302	44	0.75	1.82092e-14	0.8	0.45	EFN67135	hypothetical protein EAG_08195 [Camponotus floridanus]
Cflo_13160--XP_001599192.1_NASVI	237	kmr23_comp37088_c1_seq1	1059	237	0.726	3.7195e-113	1	0.67	EFN73572	hypothetical protein EAG_08495 [Camponotus floridanus]	3	P:GO:0090502; F:GO:0003676; F:GO:0004523	P:RNA phosphodiester bond hydrolysis, endonucleolytic; F:nucleic acid binding; F:RNA-DNA hybrid ribonuclease activity
Cflo_13188--XP_001601385.1_NASVI	274	kmr29_comp97011_c0_seq2	1226	274	0.774	1.58591e-155	1	0.68	XP_001601554	PREDICTED: hypothetical protein LOC100117260 [Nasonia vitripennis]	1	F:GO:0003676	F:nucleic acid binding
Cflo_13500--XP_001602015.1_NASVI	614	kmr23_comp83306_c0_seq1	1844	516	0.736	0	0.84	0.85	EFN83910	hypothetical protein EAI_07685 [Harpegnathos saltator]	1	C:GO:0016021	C:integral component of membrane
Cflo_13616--NA	56	kmr29_comp91069_c0_seq1	1261	51	0.725	1.90875e-18	0.91	0.12	EFN61941	hypothetical protein EAG_01313 [Camponotus floridanus]	2	F:GO:0003677; P:GO:0006355	F:DNA binding; P:regulation of transcription, DNA-templated
Cflo_13713--XP_001602496.1_NASVI	244	kmr23_comp59126_c1_seq1	676	89	0.854	2.22347e-46	0.36	0.37	EFN73726	hypothetical protein EAG_09471 [Camponotus floridanus]
Cflo_13753--NA	216	kmr25_comp80248_c0_seq1	319	106	0.792	9.98283e-57	0.49	1	EFN61454	hypothetical protein EAG_10027 [Camponotus floridanus]
Cflo_13754--NA	47	kmr29_comp93121_c1_seq2	460	47	0.809	8.39978e-21	1	0.31	EFN60973	hypothetical protein EAG_13905 [Camponotus floridanus]
Cflo_13812--NA	63	kmr23_comp96227_c0_seq1	1043	63	0.778	8.14592e-26	1	0.18	EFN74057	hypothetical protein EAG_02586 [Camponotus floridanus]	1	F:GO:0005488	F:binding
Cflo_13922--NA	49	kmr23_comp48918_c0_seq1	206	42	0.833	6.04787e-19	0.86	0.62	EFN65841	hypothetical protein EAG_08549 [Camponotus floridanus]
Cflo_13975--NA	31	kmr29_comp68773_c0_seq2	149	28	0.786	2.28482e-08	0.9	0.57	EFN63181	hypothetical protein EAG_03644 [Camponotus floridanus]
Cflo_13983--XP_001949613.1_ACYPI	235	kmr27_comp76678_c0_seq2	448	100	0.79	5.66932e-51	0.43	0.67	EFN73373	hypothetical protein EAG_05217 [Camponotus floridanus]	1	F:GO:0046872	F:metal ion binding
Cflo_14230--XP_001599119.1_NASVI	588	kmr23_comp70199_c20_seq1	1930	418	0.833	0	0.71	0.66	XP_001809187	PREDICTED: similar to predicted protein, partial [Tribolium castaneum]
Cflo_14314--XP_001945085.1_ACYPI	111	kmr23_comp28080_c0_seq1	342	28	0.714	4.33571e-09	0.25	0.25	EFN89914	Probable RNA-directed DNA polymerase from transposon X-element [Harpegnathos saltator]	2	F:GO:0003964; P:GO:0006278	F:RNA-directed DNA polymerase activity; P:RNA-dependent DNA biosynthetic process
Cflo_14364--FBpp0112870_DROME	66	kmr23_comp62090_c0_seq1	859	65	0.769	3.29611e-26	0.98	0.22	EFN70400	hypothetical protein EAG_03342 [Camponotus floridanus]
Cflo_14427--NA	107	kmr23_comp48918_c0_seq1	206	67	0.776	8.65349e-33	0.63	0.99	EFN65841	hypothetical protein EAG_08549 [Camponotus floridanus]
Cflo_14464--NA	86	kmr27_comp90317_c2_seq1	896	86	0.709	1.1245e-31	1	0.27	EFN72368	hypothetical protein EAG_16085 [Camponotus floridanus]	2	F:GO:0003676; F:GO:0046983	F:nucleic acid binding; F:protein dimerization activity
Cflo_14477--NA	179	kmr25_comp80248_c0_seq1	319	105	0.752	1.81547e-49	0.59	1	EFN61454	hypothetical protein EAG_10027 [Camponotus floridanus]
Cflo_14502--NA	141	kmr27_comp91594_c1_seq2	1516	141	0.723	1.34779e-54	1	0.27	EFN64535	hypothetical protein EAG_08616 [Camponotus floridanus]
Cflo_14640--NA	140	kmr25_comp41574_c0_seq1	240	40	0.825	3.75029e-12	0.29	0.88	EFN74260	hypothetical protein EAG_04879 [Camponotus floridanus]
Cflo_14751--NA	73	kmr25_comp83327_c5_seq7	539	73	0.726	9.62433e-29	1	0.41	EFN66880	hypothetical protein EAG_06179 [Camponotus floridanus]
Cflo_14780--XP_001602015.1_NASVI	289	kmr23_comp83306_c0_seq1	1844	275	0.727	1.09226e-126	0.95	0.54	EFN83910	hypothetical protein EAI_07685 [Harpegnathos saltator]	2	C:GO:0016020; C:GO:0016021	C:membrane; C:integral component of membrane
Cflo_15051--XP_396268.2_APIME	61	kmr29_comp93690_c1_seq2	455	58	0.81	8.12144e-30	0.95	0.38	EFN65850	Fatty acid synthase [Camponotus floridanus]	2	F:GO:0003824; P:GO:0008152	F:catalytic activity; P:metabolic process
Cflo_15096--XP_001601154.1_NASVI	102	kmr29_comp93402_c0_seq1	1990	60	0.9	2.9539e-32	0.59	0.09	EFN70499	hypothetical protein EAG_13820 [Camponotus floridanus]
Cflo_15138--XP_001605024.1_NASVI	58	kmr23_comp173965_c0_seq1	180	54	0.722	2.29178e-20	0.93	0.9	EFN62342	hypothetical protein EAG_09710 [Camponotus floridanus]	1	F:GO:0046983	F:protein dimerization activity
Cflo_15274--XP_624780.2_APIME	376	kmr25_comp85308_c1_seq9	1284	358	0.972	0	0.95	0.84	EFN60646	Ras-specific guanine nucleotide-releasing factor 1 [Camponotus floridanus]	5	P:GO:0035023; P:GO:0007264; F:GO:0005089; C:GO:0005622; P:GO:0043547	P:regulation of Rho protein signal transduction; P:small GTPase mediated signal transduction; F:Rho guanyl-nucleotide exchange factor activity; C:intracellular; P:positive regulation of GTPase activity
Cflo_15284--NA	74	kmr29_comp93121_c1_seq2	460	74	0.757	1.37194e-32	1	0.48	EFN73946	hypothetical protein EAG_11885 [Camponotus floridanus]
Cflo_15290--XP_396268.2_APIME	62	kmr29_comp93690_c1_seq1	459	60	0.717	1.27866e-27	0.97	0.39	EFN73140	Fatty acid synthase [Camponotus floridanus]	2	F:GO:0003824; P:GO:0008152	F:catalytic activity; P:metabolic process
Cflo_15576--XP_001119926.1_APIME	69	kmr27_comp91575_c0_seq17	2465	69	0.768	8.56358e-30	1	0.08	EFN72187	Membrane alanyl aminopeptidase [Camponotus floridanus]	2	P:GO:0006508; F:GO:0004177	P:proteolysis; F:aminopeptidase activity	EC:3.4.11	Acting on peptide bonds (peptidases)
Cflo_15596--XP_001601154.1_NASVI	179	kmr27_comp91807_c3_seq3	1379	178	0.837	1.09459e-94	0.99	0.39	EFN66844	hypothetical protein EAG_08548 [Camponotus floridanus]
Cflo_15621--XP_001602496.1_NASVI	144	kmr23_comp59126_c1_seq1	676	78	0.859	1.37206e-41	0.54	0.34	EFN73726	hypothetical protein EAG_09471 [Camponotus floridanus]
Cflo_15896--XP_393882.2_APIME	98	kmr27_comp88344_c0_seq5	1043	50	0.84	1.42866e-22	0.51	0.14	EFN65460	Kallikrein-14 [Camponotus floridanus]	2	P:GO:0006508; F:GO:0004252	P:proteolysis; F:serine-type endopeptidase activity	EC:3.4.21	Acting on peptide bonds (peptidases)
Cflo_15984--XP_396268.2_APIME	61	kmr29_comp93690_c1_seq2	455	61	0.705	2.69986e-27	1	0.4	EFN69999	Fatty acid synthase [Camponotus floridanus]	2	F:GO:0003824; P:GO:0008152	F:catalytic activity; P:metabolic process
Cflo_16174--XP_001600603.1_NASVI	74	kmr23_comp36542_c0_seq1	266	42	0.786	3.75863e-15	0.57	0.48	EFN60482	hypothetical protein EAG_00402 [Camponotus floridanus]
Cflo_16222--XP_001601929.1_NASVI	199	kmr23_comp65751_c2_seq1	1874	142	0.704	2.18706e-62	0.71	0.23	XP_001602000	PREDICTED: hypothetical protein LOC100117878 [Nasonia vitripennis]
Cflo_16464--XP_397430.3_APIME	67	kmr25_comp76085_c1_seq2	1547	58	0.862	2.32019e-30	0.87	0.11	EFN74652	hypothetical protein EAG_00218 [Camponotus floridanus]	1	C:GO:0016021	C:integral component of membrane
Cflo_16495--XP_001601898.1_NASVI	101	kmr25_comp86006_c2_seq3	1923	101	0.713	5.28719e-31	1	0.16	EFN67947	hypothetical protein EAG_00199 [Camponotus floridanus]
Cflo_16523--NA	42	kmr23_comp67388_c7_seq1	834	42	0.714	8.28204e-13	1	0.15	EFN68952	hypothetical protein EAG_00180 [Camponotus floridanus]
Cflo_16572--XP_001601929.1_NASVI	60	kmr23_comp58460_c0_seq1	291	60	0.783	7.91122e-19	1	0.62	EFN70688	hypothetical protein EAG_00141 [Camponotus floridanus]
Cflo_16576--XP_001601529.1_NASVI	56	kmr23_comp64649_c3_seq1	763	56	0.714	7.97917e-22	1	0.22	EFN74375	hypothetical protein EAG_00138 [Camponotus floridanus]
Cflo_16614--XP_001602541.1_NASVI	85	kmr29_comp92592_c1_seq1	786	85	0.8	3.16001e-43	1	0.32	EFN74603	hypothetical protein EAG_00100 [Camponotus floridanus]	1	F:GO:0003677	F:DNA binding
Cflo_16631--XP_001599845.1_NASVI	80	kmr25_comp85606_c2_seq7	1300	80	0.713	5.51621e-34	1	0.18	EFN72436	hypothetical protein EAG_00086 [Camponotus floridanus]
Cflo_16685--NA	46	kmr25_comp163325_c0_seq1	449	46	0.717	2.08939e-16	1	0.31	EFN72744	hypothetical protein EAG_00030 [Camponotus floridanus]
Cflo_16691--NA	49	kmr25_comp51063_c0_seq1	264	34	1	1.58077e-17	0.69	0.39	EFN60555	Transposable element Tcb2 transposase [Camponotus floridanus]
Cflo_16698--XP_001120719.1_APIME	68	kmr29_comp89289_c0_seq1	180	48	0.833	3.00144e-23	0.71	0.8	EFN64908	Histone-lysine N-methyltransferase SETMAR [Camponotus floridanus]	2	F:GO:0008168; P:GO:0032259	F:methyltransferase activity; P:methylation
Cflo_16708--XP_001601929.1_NASVI	62	kmr23_comp109791_c0_seq1	1483	60	0.733	5.26872e-26	0.97	0.12	EFN74486	hypothetical protein EAG_00008 [Camponotus floridanus]
Cflo_16733--XP_001601929.1_NASVI	55	kmr23_comp58460_c0_seq1	291	55	0.764	8.33808e-25	1	0.57	EFN69637	hypothetical protein EAG_00358 [Camponotus floridanus]
Cflo_16891--FBpp0088150_DROME	41	kmr23_comp63601_c0_seq1	660	41	0.732	4.7096e-15	1	0.19	CAA81643	blastopia polyprotein [Drosophila melanogaster]
Cflo_16899--NA	43	kmr23_comp48918_c0_seq1	206	41	0.732	3.50133e-16	0.95	0.6	EFN65030	hypothetical protein EAG_06186 [Camponotus floridanus]
Cflo_16957--NA	31	kmr23_comp153765_c0_seq1	245	29	0.759	3.96953e-08	0.94	0.36	EFN74391	Lysosomal aspartic protease [Camponotus floridanus]
Cflo_16990--NA	37	kmr29_comp93949_c0_seq1	659	37	0.73	7.97068e-12	1	0.17	EFN65284	hypothetical protein EAG_04622 [Camponotus floridanus]

## Sheet: Female_Specific_Final-TA
Table S3_D) list of Female specific gene from Final-TA assembly.
C. floridanus Gene ID	C. floridanus Gene Length	Final-TA ID	Final-TA Length	alignment Length	Identity	E-Value	Protein Coverage	TA Coverage	NCBI ID	Description of Annotation	#GO	GO IDs	GO Names	Enzyme Codes	Enzyme Names
Cflo_00008--XP_393164.3_APIME	700	kmr27_comp87432_c1_seq2	1707	464	0.791	0	0.66	0.82	EFN69285	ABC transporter G family member 20 [Camponotus floridanus]	4	F:GO:0016887; F:GO:0005524; C:GO:0016021; P:GO:0006810	F:ATPase activity; F:ATP binding; C:integral component of membrane; P:transport	EC:3.6.1.3; EC:3.6.1.15	Adenosinetriphosphatase; Nucleoside-triphosphate phosphatase
Cflo_00035--XP_001122665.1_APIME	145	kmr27_comp90347_c3_seq3	1146	142	0.732	7.40069e-64	0.98	0.36	EFN69311	Suppressor of lurcher protein 1 [Camponotus floridanus]
Cflo_00047--NP_001011567.1_APIME	404	kmr23_comp68670_c1_seq1	1374	327	0.954	0	0.81	0.71	EFN69323	Dopamine receptor 2 [Camponotus floridanus]	3	F:GO:0004930; P:GO:0007186; C:GO:0016021	F:G-protein coupled receptor activity; P:G-protein coupled receptor signaling pathway; C:integral component of membrane
Cflo_00063--XP_001121648.1_APIME	129	kmr25_comp78653_c0_seq2	538	128	0.883	5.2164e-70	0.99	0.72	EFN69339	High affinity copper uptake protein 1 [Camponotus floridanus]	3	C:GO:0016021; F:GO:0005375; P:GO:0035434	C:integral component of membrane; F:copper ion transmembrane transporter activity; P:copper ion transmembrane transport
Cflo_00064--XP_395725.2_APIME	962	kmr25_comp85262_c1_seq1	5014	961	0.945	0	1	0.61	EFN69340	Endoplasmic reticulum aminopeptidase 1 [Camponotus floridanus]	5	F:GO:0008270; P:GO:0006508; C:GO:0016021; F:GO:0004177; F:GO:0008237	F:zinc ion binding; P:proteolysis; C:integral component of membrane; F:aminopeptidase activity; F:metallopeptidase activity	EC:3.4.11	Acting on peptide bonds (peptidases)
Cflo_00073--NA	351	kmr23_comp66279_c1_seq1	291	25	0.96	1.10692e-10	0.07	0.26	EFN69349	hypothetical protein EAG_01089 [Camponotus floridanus]
Cflo_00074--NA	288	kmr23_comp125839_c0_seq1	357	33	0.879	2.44826e-17	0.11	0.28	EFN69350	hypothetical protein EAG_01090 [Camponotus floridanus]
Cflo_00090--XP_624017.1_APIME	323	kmr27_comp88965_c0_seq13	1335	167	0.988	6.46186e-92	0.52	0.38	EFN69366	Nucleolysin TIA-1 isoform p40 [Camponotus floridanus]	2	F:GO:0000166; F:GO:0003676	F:nucleotide binding; F:nucleic acid binding
Cflo_00095--NA	162	kmr23_comp50503_c0_seq1	264	60	0.933	3.18849e-32	0.37	0.73	EFN69371	hypothetical protein EAG_01111 [Camponotus floridanus]
Cflo_00111--XP_623955.2_APIME	498	kmr25_comp83732_c1_seq1	1780	496	0.72	0	1	0.84	EFN69386	Cytochrome P450 6k1 [Camponotus floridanus]	6	F:GO:0005506; F:GO:0016705; C:GO:0016021; P:GO:0055114; F:GO:0004497; F:GO:0020037	F:iron ion binding; F:oxidoreductase activity, acting on paired donors, with incorporation or reduction of molecular oxygen; C:integral component of membrane; P:oxidation-reduction process; F:monooxygenase activity; F:heme binding
Cflo_00118--XP_396230.2_APIME	198	kmr29_comp95461_c4_seq2	2364	198	0.995	4.20226e-135	1	0.25	EGI60515	Sodium/potassium/calcium exchanger Nckx30C [Acromyrmex echinatior]	2	P:GO:0055085; C:GO:0016021	P:transmembrane transport; C:integral component of membrane
Cflo_00146--XP_393429.2_APIME	1304	kmr23_comp69472_c1_seq1	1910	629	0.863	0	0.48	0.99	EFN72913	Myosin IIIA [Camponotus floridanus]	6	C:GO:0016459; F:GO:0005524; P:GO:0018108; F:GO:0004713; F:GO:0003779; F:GO:0003774	C:myosin complex; F:ATP binding; P:peptidyl-tyrosine phosphorylation; F:protein tyrosine kinase activity; F:actin binding; F:motor activity	EC:2.7.10; EC:3.6.1.15	Transferring phosphorus-containing groups; Nucleoside-triphosphate phosphatase
Cflo_00152--NA	227	kmr23_comp84961_c0_seq1	2106	25	0.96	6.83471e-07	0.11	0.04	EFN72919	hypothetical protein EAG_11210 [Camponotus floridanus]
Cflo_00153--XP_396945.3_APIME	367	kmr23_comp84961_c0_seq1	2106	283	0.883	6.62707e-172	0.77	0.37	EFN72920	Protein Wnt-6 [Camponotus floridanus]	4	P:GO:0007275; P:GO:0016055; F:GO:0005102; C:GO:0005578	P:multicellular organism development; P:Wnt signaling pathway; F:receptor binding; C:proteinaceous extracellular matrix
Cflo_00157--XP_001121326.1_APIME	71	kmr23_comp49704_c0_seq1	213	31	0.935	7.88665e-14	0.44	0.44	EFN72924	Putative gustatory receptor 28b [Camponotus floridanus]	3	P:GO:0050909; C:GO:0016021; C:GO:0005886	P:sensory perception of taste; C:integral component of membrane; C:plasma membrane
Cflo_00162--NA	263	kmr27_comp53616_c1_seq1	540	91	0.945	2.36504e-54	0.35	0.51	EFN72929	hypothetical protein EAG_11220 [Camponotus floridanus]
Cflo_00281--XP_394129.2_APIME	660	kmr25_comp80179_c0_seq2	2511	563	0.998	0	0.85	0.67	EFN73042	E3 ubiquitin-protein ligase mind-bomb [Camponotus floridanus]	4	F:GO:0004842; F:GO:0008270; F:GO:0016874; P:GO:0016567	F:ubiquitin-protein transferase activity; F:zinc ion binding; F:ligase activity; P:protein ubiquitination
Cflo_00289--NA	101	kmr23_comp42590_c0_seq1	385	31	0.806	5.00688e-11	0.31	0.24	EFN73050	hypothetical protein EAG_11343 [Camponotus floridanus]
Cflo_00316--XP_001122653.1_APIME	140	kmr25_comp81475_c2_seq1	2564	135	0.978	1.25602e-55	0.96	0.16	EFN60376	Protein rhomboid [Camponotus floridanus]	3	P:GO:0006508; C:GO:0016021; F:GO:0004252	P:proteolysis; C:integral component of membrane; F:serine-type endopeptidase activity	EC:3.4.21	Acting on peptide bonds (peptidases)
Cflo_00323--XP_394042.2_APIME	243	kmr25_comp76372_c1_seq1	1229	196	0.867	2.73382e-123	0.81	0.48	EFN60383	Cell adhesion molecule 1 [Camponotus floridanus]	1	C:GO:0016021	C:integral component of membrane
Cflo_00338--XP_001122993.1_APIME	373	kmr27_comp88620_c5_seq1	1196	305	0.957	4.53773e-131	0.82	0.77	EFN60398	Transcription factor SOX-8 [Camponotus floridanus]	2	F:GO:0000981; P:GO:0006357	F:RNA polymerase II transcription factor activity, sequence-specific DNA binding; P:regulation of transcription from RNA polymerase II promoter
Cflo_00339--XP_001122996.1_APIME	341	kmr23_comp94667_c0_seq1	1649	324	0.941	0	0.95	0.59	EFN60399	Transcription factor SOX-8 [Camponotus floridanus]	2	F:GO:0000981; P:GO:0006357	F:RNA polymerase II transcription factor activity, sequence-specific DNA binding; P:regulation of transcription from RNA polymerase II promoter
Cflo_00344--XP_625192.2_APIME	2124	kmr31_comp1847_c1_seq1	7137	2124	0.893	0	1	0.89	EFN60404	Activating signal cointegrator 1 complex subunit 3 [Camponotus floridanus]	3	F:GO:0003676; F:GO:0005524; F:GO:0004386	F:nucleic acid binding; F:ATP binding; F:helicase activity	EC:3.6.1.15	Nucleoside-triphosphate phosphatase
Cflo_00359--NA	555	kmr29_comp95833_c4_seq1	8294	116	0.853	4.68556e-85	0.21	0.04	EFN60419	hypothetical protein EAG_02131 [Camponotus floridanus]
Cflo_00378--XP_394629.3_APIME	385	kmr23_comp69750_c2_seq1	233	63	1	5.92984e-37	0.16	0.82	EFN64801	hypothetical protein EAG_03571 [Camponotus floridanus]
Cflo_00385--XP_394629.3_APIME	282	kmr23_comp69750_c3_seq1	1926	182	0.956	1.84437e-67	0.65	0.29	EFN64808	hypothetical protein EAG_03578 [Camponotus floridanus]
Cflo_00410--FBpp0288865_DROME	113	kmr25_comp86005_c4_seq10	1600	76	0.895	3.41434e-41	0.67	0.14	EFN64833	hypothetical protein EAG_03603 [Camponotus floridanus]
Cflo_00423--NP_001011650.1_APIME	84	kmr25_comp84316_c0_seq3	2663	79	0.937	3.56116e-32	0.94	0.09	EFN64845	hypothetical protein EAG_03615 [Camponotus floridanus]
Cflo_00424--NP_001011650.1_APIME	553	kmr25_comp84316_c0_seq2	3153	553	0.966	0	1	0.53	EFN64846	Head-specific guanylate cyclase [Camponotus floridanus]	6	F:GO:0000166; P:GO:0006182; F:GO:0004383; C:GO:0005622; P:GO:0035556; F:GO:0020037	F:nucleotide binding; P:cGMP biosynthetic process; F:guanylate cyclase activity; C:intracellular; P:intracellular signal transduction; F:heme binding	EC:4.6.1.2	Guanylate cyclase
Cflo_00444--XP_396271.3_APIME	159	kmr23_comp69042_c0_seq1	1600	156	0.917	2.14006e-58	0.98	0.29	EFN64864	hypothetical protein EAG_03635 [Camponotus floridanus]
Cflo_00454--XP_393529.3_APIME	403	kmr25_comp82971_c0_seq1	1311	400	0.83	0	0.99	0.92	EFN73590	Ornithine decarboxylase [Camponotus floridanus]	2	F:GO:0003824; P:GO:0006596	F:catalytic activity; P:polyamine biosynthetic process
Cflo_00458--XP_001120454.1_APIME	247	kmr23_comp53795_c2_seq1	1162	247	0.826	4.05746e-143	1	0.64	EFN73594	Trypsin-4 [Camponotus floridanus]	2	P:GO:0006508; F:GO:0004252	P:proteolysis; F:serine-type endopeptidase activity	EC:3.4.21	Acting on peptide bonds (peptidases)
Cflo_00459--XP_001120454.1_APIME	253	kmr23_comp69619_c0_seq1	869	253	0.858	5.07899e-134	1	0.88	EFN73595	Trypsin-1 [Camponotus floridanus]	2	P:GO:0006508; F:GO:0004252	P:proteolysis; F:serine-type endopeptidase activity	EC:3.4.21	Acting on peptide bonds (peptidases)
Cflo_00460--XP_397087.2_APIME	251	kmr27_comp89835_c5_seq3	845	251	0.777	3.68515e-141	1	0.91	EFN73596	Trypsin-3 [Camponotus floridanus]	2	P:GO:0006508; F:GO:0004252	P:proteolysis; F:serine-type endopeptidase activity	EC:3.4.21	Acting on peptide bonds (peptidases)
Cflo_00465--XP_001120638.1_APIME	388	kmr25_comp85381_c0_seq2	2307	388	0.954	0	1	0.5	EFN73601	Transmembrane and TPR repeat-containing protein 1 [Camponotus floridanus]	1	C:GO:0016021	C:integral component of membrane
Cflo_00467--XP_001120919.1_APIME	502	kmr23_comp37798_c0_seq1	1575	432	0.708	2.1708e-135	0.86	0.52	EFN73603	Ecdysteroid UDP-glucosyltransferase [Camponotus floridanus]	3	F:GO:0016758; P:GO:0008152; C:GO:0016021	F:transferase activity, transferring hexosyl groups; P:metabolic process; C:integral component of membrane
Cflo_00468--XP_396494.3_APIME	558	kmr27_comp89913_c0_seq1	2433	490	0.89	0	0.88	0.6	EFN73604	Ecdysteroid UDP-glucosyltransferase [Camponotus floridanus]	3	F:GO:0016758; P:GO:0008152; C:GO:0016021	F:transferase activity, transferring hexosyl groups; P:metabolic process; C:integral component of membrane
Cflo_00478--NA	168	kmr25_comp85860_c0_seq3	1679	102	0.824	5.89139e-32	0.61	0.18	EFN73614	hypothetical protein EAG_08411 [Camponotus floridanus]
Cflo_00485--NA	102	kmr23_comp35630_c1_seq1	341	45	0.911	6.28215e-33	0.44	0.4	EFN73621	hypothetical protein EAG_08418 [Camponotus floridanus]
Cflo_00507--XP_395079.2_APIME	315	kmr23_comp53604_c0_seq1	3507	230	0.913	1.90993e-156	0.73	0.24	EFN73642	Pancreatic triacylglycerol lipase [Camponotus floridanus]	2	C:GO:0005576; F:GO:0052689	C:extracellular region; F:carboxylic ester hydrolase activity	EC:3.1.1.1	Carboxylesterase
Cflo_00528--XP_624287.2_APIME	119	kmr25_comp80544_c2_seq3	887	119	0.992	5.43694e-68	1	0.4	EFN73663	Tetraspanin-5 [Camponotus floridanus]	1	C:GO:0016021	C:integral component of membrane
Cflo_00537--XP_001604279.1_NASVI	445	kmr29_comp95299_c1_seq42	1088	292	0.918	2.02444e-153	0.66	0.81	EFN73672	hypothetical protein EAG_08469 [Camponotus floridanus]
Cflo_00571--XP_001120292.1_APIME	486	kmr27_comp90959_c0_seq17	2735	486	0.901	0	1	0.49	EFN70989	Gamma-aminobutyric acid receptor subunit beta [Camponotus floridanus]	8	P:GO:0007165; P:GO:0034220; C:GO:0016021; F:GO:0004890; C:GO:0030054; F:GO:0005230; C:GO:0045202; C:GO:0005886	P:signal transduction; P:ion transmembrane transport; C:integral component of membrane; F:GABA-A receptor activity; C:cell junction; F:extracellular ligand-gated ion channel activity; C:synapse; C:plasma membrane
Cflo_00572--NA	148	kmr23_comp33275_c0_seq1	773	33	0.818	1.23552e-09	0.22	0.13	EFN70990	hypothetical protein EAG_09879 [Camponotus floridanus]
Cflo_00573--XP_394694.3_APIME	879	kmr25_comp84950_c1_seq1	4938	879	0.953	0	1	0.54	EFN70991	Glutamate receptor 1 [Camponotus floridanus]	7	C:GO:0045211; P:GO:0034220; C:GO:0016021; C:GO:0030054; P:GO:0035235; F:GO:0004970; F:GO:0005234	C:postsynaptic membrane; P:ion transmembrane transport; C:integral component of membrane; C:cell junction; P:ionotropic glutamate receptor signaling pathway; F:ionotropic glutamate receptor activity; F:extracellular-glutamate-gated ion channel activity
Cflo_00595--NA	529	kmr29_comp96073_c0_seq22	762	67	0.821	5.55051e-26	0.13	0.26	EFN71012	hypothetical protein EAG_09902 [Camponotus floridanus]	1	C:GO:0016021	C:integral component of membrane
Cflo_00612--XP_001121679.1_APIME	56	kmr25_comp81602_c1_seq2	631	56	1	8.51557e-35	1	0.27	EFN71029	Krueppel-like factor 7 [Camponotus floridanus]	2	F:GO:0003676; F:GO:0046872	F:nucleic acid binding; F:metal ion binding
Cflo_00639--XP_001121348.1_APIME	380	kmr25_comp54141_c1_seq2	610	199	0.925	3.05309e-95	0.52	0.99	EFN72624	Protein Wnt-11 [Camponotus floridanus]	4	P:GO:0007275; P:GO:0016055; F:GO:0005102; C:GO:0005578	P:multicellular organism development; P:Wnt signaling pathway; F:receptor binding; C:proteinaceous extracellular matrix
Cflo_00640--XP_395125.3_APIME	525	kmr23_comp34256_c1_seq1	1868	523	0.807	0	1	0.86	EFN72625	Arylsulfatase B [Camponotus floridanus]	2	F:GO:0008484; P:GO:0008152	F:sulfuric ester hydrolase activity; P:metabolic process
Cflo_00641--XP_395125.3_APIME	525	kmr23_comp34256_c1_seq1	1868	522	0.852	0	0.99	0.84	EFN72626	Arylsulfatase B [Camponotus floridanus]	2	F:GO:0008484; P:GO:0008152	F:sulfuric ester hydrolase activity; P:metabolic process
Cflo_00642--XP_624148.2_APIME	591	kmr25_comp79323_c0_seq1	2261	591	0.817	0	1	0.78	EFN72627	Arylsulfatase B [Camponotus floridanus]	3	F:GO:0008484; P:GO:0008152; C:GO:0016021	F:sulfuric ester hydrolase activity; P:metabolic process; C:integral component of membrane
Cflo_00680--XP_623764.2_APIME	258	kmr23_comp31848_c0_seq1	513	169	0.988	1.12639e-49	0.66	0.99	EFN72665	hypothetical protein EAG_06849 [Camponotus floridanus]
Cflo_00691--XP_394382.2_APIME	367	kmr25_comp65807_c0_seq1	1873	367	0.989	0	1	0.59	EFN72675	Guanine nucleotide-binding protein subunit alpha-like protein [Camponotus floridanus]	8	F:GO:0005525; F:GO:0001664; P:GO:0007186; P:GO:0007264; F:GO:0003924; F:GO:0031683; F:GO:0004871; C:GO:0005622	F:GTP binding; F:G-protein coupled receptor binding; P:G-protein coupled receptor signaling pathway; P:small GTPase mediated signal transduction; F:GTPase activity; F:G-protein beta/gamma-subunit complex binding; F:signal transducer activity; C:intracellular	EC:3.6.1.15	Nucleoside-triphosphate phosphatase
Cflo_00729--NA	125	kmr23_comp110950_c0_seq1	458	86	0.779	1.07196e-34	0.69	0.59	EFN72711	hypothetical protein EAG_06896 [Camponotus floridanus]
Cflo_00796--XP_395697.2_APIME	263	kmr27_comp84203_c0_seq1	1623	262	0.893	2.57326e-175	1	0.49	EFN67188	Caspase-1 [Camponotus floridanus]	3	P:GO:0006508; P:GO:0006915; F:GO:0004197	P:proteolysis; P:apoptotic process; F:cysteine-type endopeptidase activity	EC:3.4.22	Acting on peptide bonds (peptidases)
Cflo_00801--XP_395132.2_APIME	131	kmr29_comp86650_c0_seq2	1042	131	0.924	4.82547e-65	1	0.38	EFN67193	hypothetical protein EAG_09064 [Camponotus floridanus]
Cflo_00823--XP_001120320.1_APIME	341	kmr23_comp104012_c0_seq1	878	220	0.955	9.58247e-125	0.65	0.75	EFN67214	Achaete-scute-like protein 1a [Camponotus floridanus]	2	F:GO:0003677; F:GO:0046983	F:DNA binding; F:protein dimerization activity
Cflo_00833--XP_396660.2_APIME	403	kmr25_comp80247_c0_seq1	1191	327	0.859	2.00944e-171	0.81	0.77	EFN67222	Gastrin/cholecystokinin type B receptor [Camponotus floridanus]	3	F:GO:0004930; P:GO:0007186; C:GO:0016021	F:G-protein coupled receptor activity; P:G-protein coupled receptor signaling pathway; C:integral component of membrane
Cflo_00839--NA	532	kmr23_comp28231_c0_seq1	635	141	0.745	4.93857e-57	0.27	0.71	EFN67228	hypothetical protein EAG_09102 [Camponotus floridanus]
Cflo_00847--NA	502	kmr29_comp95622_c0_seq9	707	48	0.875	1.0209e-10	0.1	0.2	EFN67236	hypothetical protein EAG_09110 [Camponotus floridanus]
Cflo_00867--XP_392355.3_APIME	101	kmr29_comp84764_c0_seq1	2846	101	1	4.06641e-61	1	0.11	EFN67530	Homeobox protein prospero [Camponotus floridanus]	1	F:GO:0003677	F:DNA binding
Cflo_00881--NA	662	kmr23_comp154129_c0_seq1	280	74	0.946	1.01404e-27	0.11	0.8	EFN67544	hypothetical protein EAG_16225 [Camponotus floridanus]
Cflo_00941--XP_396908.2_APIME	521	kmr27_comp89276_c0_seq2	2890	521	0.996	0	1	0.54	EFN67603	Tyrosine-protein kinase Src64B [Camponotus floridanus]	3	F:GO:0005524; P:GO:0018108; F:GO:0004715	F:ATP binding; P:peptidyl-tyrosine phosphorylation; F:non-membrane spanning protein tyrosine kinase activity	EC:2.7.10; EC:2.7.10.2	Transferring phosphorus-containing groups; Non-specific protein-tyrosine kinase
Cflo_00949--XP_001120780.1_APIME	193	kmr23_comp83968_c0_seq1	1020	190	0.889	6.30372e-107	0.98	0.56	EFN68211	Allatostatins [Camponotus floridanus] >gi|386642841|tpg|DAA35076.1| TPA_exp: allatostatin [Camponotus floridanus]	2	P:GO:0007218; C:GO:0005576	P:neuropeptide signaling pathway; C:extracellular region
Cflo_00950--XP_001604404.1_NASVI	481	kmr25_comp58098_c0_seq1	1695	481	0.865	0	1	0.85	EFN68212	Amnionless protein [Camponotus floridanus]	1	C:GO:0016021	C:integral component of membrane
Cflo_01013--XP_624251.2_APIME	491	kmr31_comp2408_c0_seq4	2052	489	0.791	0	1	0.71	EFN68275	Putative inorganic phosphate cotransporter [Camponotus floridanus]	2	P:GO:0055085; C:GO:0016021	P:transmembrane transport; C:integral component of membrane
Cflo_01078--NA	327	kmr23_comp118712_c0_seq1	376	70	0.929	1.23251e-38	0.21	0.56	EFN68340	hypothetical protein EAG_13251 [Camponotus floridanus]
Cflo_01136--XP_624420.1_APIME	450	kmr25_comp83160_c0_seq8	1676	450	0.896	0	1	0.8	EFN73897	WD repeat-containing protein 51B [Camponotus floridanus]
Cflo_01204--XP_001121814.1_APIME	585	kmr23_comp67323_c0_seq1	2610	585	0.821	0	1	0.67	EFN62390	4-coumarate--CoA ligase 1 [Camponotus floridanus]	2	P:GO:0008152; F:GO:0016874	P:metabolic process; F:ligase activity
Cflo_01238--NP_001011566.1_APIME	563	kmr27_comp89058_c0_seq1	2947	563	0.865	0	1	0.61	EFN62423	Krueppel-like proteinous protein 1 [Camponotus floridanus]	2	F:GO:0003676; F:GO:0046872	F:nucleic acid binding; F:metal ion binding
Cflo_01244--NA	35	kmr25_comp83204_c0_seq1	1066	35	0.857	6.5813e-13	1	0.1	EFN62429	hypothetical protein EAG_01619 [Camponotus floridanus]
Cflo_01308--XP_396250.2_APIME	461	kmr25_comp84653_c1_seq3	1762	460	0.896	0	1	0.79	EFN65644	Sugar transporter ERD6-like 4 [Camponotus floridanus]	4	F:GO:0022891; P:GO:0055085; C:GO:0016021; P:GO:0008643	F:substrate-specific transmembrane transporter activity; P:transmembrane transport; C:integral component of membrane; P:carbohydrate transport
Cflo_01318--XP_393833.3_APIME	278	kmr27_comp89377_c0_seq7	2171	278	1	1.02157e-167	1	0.38	EFN65654	CUG-BP- and ETR-3-like factor 4 [Camponotus floridanus]	2	F:GO:0000166; F:GO:0003676	F:nucleotide binding; F:nucleic acid binding
Cflo_01319--XP_393833.3_APIME	249	kmr29_comp95463_c0_seq38	903	36	1	9.22404e-17	0.14	0.12	EFN65655	CUG-BP- and ETR-3-like factor 4 [Camponotus floridanus]	2	F:GO:0000166; F:GO:0003676	F:nucleotide binding; F:nucleic acid binding
Cflo_01360--NA	163	kmr23_comp60551_c1_seq1	202	33	1	1.22669e-23	0.2	0.49	EFN65696	hypothetical protein EAG_10953 [Camponotus floridanus]
Cflo_01379--XP_394454.2_APIME	733	kmr27_comp83343_c3_seq1	1211	391	0.974	0	0.53	0.97	EFN71073	Gamma-aminobutyric acid type B receptor subunit 2 [Camponotus floridanus]	3	F:GO:0004965; P:GO:0007186; C:GO:0016021	F:G-protein coupled GABA receptor activity; P:G-protein coupled receptor signaling pathway; C:integral component of membrane
Cflo_01392--XP_623409.2_APIME	738	kmr23_comp66340_c0_seq1	4609	711	0.982	0	0.96	0.46	EFN71086	ATP-binding cassette sub-family G member 4 [Camponotus floridanus]	3	F:GO:0016887; F:GO:0005524; C:GO:0016021	F:ATPase activity; F:ATP binding; C:integral component of membrane	EC:3.6.1.3; EC:3.6.1.15	Adenosinetriphosphatase; Nucleoside-triphosphate phosphatase
Cflo_01441--XP_624772.1_APIME	57	kmr23_comp33418_c0_seq1	2518	57	1	3.32839e-34	1	0.07	EGI62248	Krueppel-like factor 5 [Acromyrmex echinatior]	2	F:GO:0003676; F:GO:0046872	F:nucleic acid binding; F:metal ion binding
Cflo_01447--NA	373	kmr25_comp81117_c0_seq2	1290	47	0.702	3.00011e-12	0.13	0.1	EFN62234	hypothetical protein EAG_12397 [Camponotus floridanus]
Cflo_01456--XP_393220.3_APIME	3395	kmr25_comp85567_c4_seq7	6002	1368	0.77	0	0.4	0.77	EFN62243	Basement membrane-specific heparan sulfate proteoglycan core protein [Camponotus floridanus]	1	F:GO:0005509	F:calcium ion binding
Cflo_01457--NA	32	kmr29_comp96761_c1_seq120	475	32	0.938	5.92739e-14	1	0.2	EFN62244	hypothetical protein EAG_12407 [Camponotus floridanus]
Cflo_01464--XP_001120330.1_APIME	281	kmr25_comp83574_c1_seq6	1902	47	0.915	5.28695e-23	0.17	0.07	EFN62251	hypothetical protein EAG_12414 [Camponotus floridanus]
Cflo_01465--XP_392503.3_APIME	276	kmr25_comp83574_c1_seq6	1902	266	0.932	0	0.96	0.42	EFN62252	hypothetical protein EAG_12415 [Camponotus floridanus]
Cflo_01469--XP_001600650.1_NASVI	339	kmr29_comp82999_c0_seq1	960	194	0.809	6.33644e-64	0.57	0.61	EFN62256	hypothetical protein EAG_12419 [Camponotus floridanus]
Cflo_01476--XP_001120600.1_APIME	221	kmr23_comp113427_c0_seq1	591	178	0.843	6.19335e-52	0.81	0.92	EFN62263	hypothetical protein EAG_12426 [Camponotus floridanus]
Cflo_01477--XP_623414.2_APIME	116	kmr29_comp89151_c2_seq7	331	72	0.875	7.30255e-17	0.62	0.63	EFN62264	hypothetical protein EAG_12427 [Camponotus floridanus]	1	C:GO:0016021	C:integral component of membrane
Cflo_01485--NA	689	kmr23_comp60241_c0_seq1	187	39	0.923	2.70898e-17	0.06	0.63	EFN60714	hypothetical protein EAG_09353 [Camponotus floridanus]
Cflo_01498--NA	118	kmr27_comp91430_c6_seq1	2363	33	1	9.046e-14	0.28	0.04	EFN60727	hypothetical protein EAG_09366 [Camponotus floridanus]
Cflo_01501--NA	332	kmr23_comp119658_c0_seq1	403	52	0.923	5.23736e-25	0.16	0.39	EFN60730	hypothetical protein EAG_09369 [Camponotus floridanus]
Cflo_01511--XP_394683.3_APIME	201	kmr25_comp71135_c1_seq1	1635	201	0.97	2.4097e-127	1	0.37	EFN60740	GTP-binding protein RAD [Camponotus floridanus]	4	F:GO:0005525; P:GO:0007264; C:GO:0016020; C:GO:0005622	F:GTP binding; P:small GTPase mediated signal transduction; C:membrane; C:intracellular
Cflo_01522--XP_394502.1_APIME	121	kmr25_comp74119_c1_seq2	357	46	1	7.92168e-15	0.38	0.39	EFN60750	hypothetical protein EAG_09389 [Camponotus floridanus]
Cflo_01523--XP_394502.1_APIME	186	kmr23_comp66227_c1_seq1	629	134	0.791	9.64714e-29	0.72	0.64	EFN60751	Pituitary homeobox 3 [Camponotus floridanus]	2	C:GO:0005634; F:GO:0003677	C:nucleus; F:DNA binding
Cflo_01538--XP_001120354.1_APIME	71	kmr23_comp59044_c1_seq1	460	70	0.9	1.69289e-28	0.99	0.46	EFN68379	hypothetical protein EAG_10352 [Camponotus floridanus]
Cflo_01558--XP_001123316.1_APIME	354	kmr23_comp59381_c0_seq1	2565	354	0.904	0	1	0.42	EFN68398	Calcium release-activated calcium channel protein 1 [Camponotus floridanus]	1	C:GO:0016021	C:integral component of membrane
Cflo_01615--NA	363	kmr23_comp69223_c5_seq1	255	57	0.86	1.62082e-26	0.16	0.67	EFN68455	hypothetical protein EAG_10428 [Camponotus floridanus]
Cflo_01627--XP_001121685.1_APIME	974	kmr23_comp58278_c2_seq1	1831	595	0.946	0	0.61	0.98	EFN68466	Synaptotagmin-12 [Camponotus floridanus]	3	P:GO:0046928; C:GO:0016020; P:GO:0060291	P:regulation of neurotransmitter secretion; C:membrane; P:long-term synaptic potentiation
Cflo_01635--XP_001121897.1_APIME	537	kmr27_comp88256_c1_seq3	1855	536	0.821	0	1	0.87	EFN68474	Esterase E4 [Camponotus floridanus]	2	P:GO:0008152; F:GO:0016787	P:metabolic process; F:hydrolase activity
Cflo_01687--XP_394510.3_APIME	257	kmr23_comp68073_c2_seq1	592	163	0.761	4.59857e-88	0.63	0.83	EFN61925	Homeotic protein spalt-major [Camponotus floridanus]	1	F:GO:0046872	F:metal ion binding
Cflo_01689--NA	60	kmr29_comp83774_c0_seq2	1567	60	0.917	8.75436e-30	1	0.11	EFN61927	hypothetical protein EAG_15756 [Camponotus floridanus]
Cflo_01699--XP_001121872.1_APIME	99	kmr27_comp82283_c2_seq2	862	95	0.779	3.68958e-46	0.96	0.33	EFN74009	hypothetical protein EAG_14593 [Camponotus floridanus]
Cflo_01740--NA	185	kmr23_comp40046_c0_seq1	313	65	0.846	8.35756e-29	0.35	0.62	EFN74050	hypothetical protein EAG_14634 [Camponotus floridanus]
Cflo_01750--XP_001122125.1_APIME	161	kmr23_comp69460_c5_seq1	359	77	0.909	3.58627e-44	0.48	0.65	EFN73783	hypothetical protein EAG_06425 [Camponotus floridanus]
Cflo_01781--XP_393831.3_APIME	755	kmr31_comp1930_c0_seq1	6367	755	0.877	0	1	0.36	EFN73814	Neurogenic locus protein delta [Camponotus floridanus]	4	P:GO:0007154; P:GO:0007275; F:GO:0005509; C:GO:0016021	P:cell communication; P:multicellular organism development; F:calcium ion binding; C:integral component of membrane
Cflo_01804--XP_001122596.1_APIME	534	kmr23_comp67699_c2_seq1	3228	534	0.918	0	1	0.5	EFN73837	Pancreatic lipase-related protein 2 [Camponotus floridanus]	3	P:GO:0006629; F:GO:0004806; C:GO:0005576	P:lipid metabolic process; F:triglyceride lipase activity; C:extracellular region	EC:3.1.1.1; EC:3.1.1.3	Carboxylesterase; Triacylglycerol lipase
Cflo_01812--NA	738	kmr27_comp83282_c0_seq3	614	134	0.955	6.82843e-70	0.18	0.66	EFN73845	hypothetical protein EAG_06487 [Camponotus floridanus]
Cflo_01829--XP_395101.3_APIME	465	kmr23_comp69881_c3_seq1	2312	465	0.862	0	1	0.61	EFN64112	Neuromedin-B receptor [Camponotus floridanus]	3	P:GO:0007218; C:GO:0016021; F:GO:0004983	P:neuropeptide signaling pathway; C:integral component of membrane; F:neuropeptide Y receptor activity
Cflo_01841--XP_001122135.1_APIME	466	kmr29_comp90859_c2_seq1	1686	452	0.918	0	0.97	0.8	EFN64124	Neuropeptides capa receptor [Camponotus floridanus]	3	P:GO:0007218; C:GO:0016021; F:GO:0001607	P:neuropeptide signaling pathway; C:integral component of membrane; F:neuromedin U receptor activity
Cflo_01888--NA	428	kmr29_comp91682_c0_seq1	3479	87	0.977	1.12574e-35	0.2	0.08	EFN64169	hypothetical protein EAG_08271 [Camponotus floridanus]
Cflo_01889--XP_001120905.1_APIME	78	kmr29_comp91682_c0_seq1	3479	78	1	5.23111e-49	1	0.07	EFN64170	Zinc finger protein 39 [Camponotus floridanus]	2	F:GO:0003676; F:GO:0046872	F:nucleic acid binding; F:metal ion binding
Cflo_01957--XP_001121533.1_APIME	276	kmr25_comp84528_c1_seq4	1962	276	0.953	0	1	0.42	EFN74157	BDNF/NT-3 growth factors receptor [Camponotus floridanus]	4	F:GO:0005524; P:GO:0018108; F:GO:0004713; C:GO:0016021	F:ATP binding; P:peptidyl-tyrosine phosphorylation; F:protein tyrosine kinase activity; C:integral component of membrane	EC:2.7.10	Transferring phosphorus-containing groups
Cflo_01963--NA	116	kmr25_comp60240_c0_seq1	544	116	0.75	1.64286e-33	1	0.68	EFN74163	hypothetical protein EAG_14075 [Camponotus floridanus]
Cflo_01988--XP_394361.1_APIME	415	kmr27_comp83452_c0_seq1	1532	415	0.759	0	1	0.82	EFN74188	T-box protein 2 [Camponotus floridanus]	5	C:GO:0005634; F:GO:0003677; F:GO:0003700; P:GO:0006351; P:GO:0006355	C:nucleus; F:DNA binding; F:transcription factor activity, sequence-specific DNA binding; P:transcription, DNA-templated; P:regulation of transcription, DNA-templated
Cflo_01989--XP_394360.1_APIME	392	kmr23_comp30660_c0_seq1	394	132	0.841	1.39551e-71	0.34	1	EFN74189	Phospholipase A1 member A [Camponotus floridanus]	2	C:GO:0005576; F:GO:0052689	C:extracellular region; F:carboxylic ester hydrolase activity	EC:3.1.1.1	Carboxylesterase
Cflo_02042--NA	599	kmr29_comp90264_c1_seq3	368	53	0.943	5.83136e-24	0.09	0.43	EFN70348	hypothetical protein EAG_11131 [Camponotus floridanus]
Cflo_02065--XP_001122856.1_APIME	107	kmr23_comp146445_c0_seq1	225	43	0.721	6.35456e-13	0.4	0.57	EFN70371	hypothetical protein EAG_11154 [Camponotus floridanus]	3	F:GO:0004930; P:GO:0007186; C:GO:0016021	F:G-protein coupled receptor activity; P:G-protein coupled receptor signaling pathway; C:integral component of membrane
Cflo_02074--FBpp0113067_DROME	266	kmr25_comp83329_c0_seq3	879	148	0.824	9.5157e-71	0.56	0.48	EFN70380	hypothetical protein EAG_11163 [Camponotus floridanus]	8	P:GO:1903818; P:GO:0048511; P:GO:0045187; F:GO:0034235; P:GO:0030431; P:GO:0032222; C:GO:0005886; C:GO:0031225	P:positive regulation of voltage-gated potassium channel activity; P:rhythmic process; P:regulation of circadian sleep/wake cycle, sleep; F:GPI anchor binding; P:sleep; P:regulation of synaptic transmission, cholinergic; C:plasma membrane; C:anchored component of membrane
Cflo_02075--FBpp0113067_DROME	129	kmr25_comp83329_c0_seq1	1216	127	0.787	9.93731e-51	0.98	0.35	EFN70381	hypothetical protein EAG_11164 [Camponotus floridanus]	9	P:GO:1903818; P:GO:0048511; P:GO:0045187; C:GO:0016021; F:GO:0034235; P:GO:0030431; P:GO:0032222; C:GO:0005886; C:GO:0031225	P:positive regulation of voltage-gated potassium channel activity; P:rhythmic process; P:regulation of circadian sleep/wake cycle, sleep; C:integral component of membrane; F:GPI anchor binding; P:sleep; P:regulation of synaptic transmission, cholinergic; C:plasma membrane; C:anchored component of membrane
Cflo_02097--XP_001122829.1_APIME	948	kmr23_comp72051_c0_seq1	3682	948	0.739	0	1	0.78	EFN68776	Probable dolichyl-P-Man:Man(7)GlcNAc(2)-PP-dolichyl-alpha-1, 6-mannosyltransferase [Camponotus floridanus]	2	F:GO:0016757; C:GO:0016021	F:transferase activity, transferring glycosyl groups; C:integral component of membrane
Cflo_02124--XP_623709.2_APIME	1862	kmr23_comp63671_c2_seq1	3481	1168	0.81	0	0.63	1	EFN68802	Leucine-rich repeat-containing protein 68 [Camponotus floridanus]
Cflo_02152--NP_001035356.1_APIME	365	kmr27_comp91542_c10_seq19	1769	299	0.93	3.89258e-157	0.82	0.49	EFN67811	Broad-complex core protein isoforms 1/2/3/4/5 [Camponotus floridanus]
Cflo_02154--NP_001035356.1_APIME	75	kmr27_comp91542_c10_seq25	1204	60	1	4.77205e-37	0.8	0.15	EFN67813	Broad-complex core protein isoform 6 [Camponotus floridanus]	2	F:GO:0003676; F:GO:0046872	F:nucleic acid binding; F:metal ion binding
Cflo_02155--NP_001035356.1_APIME	71	kmr29_comp96607_c6_seq35	1874	71	1	5.33064e-45	1	0.21	XP_003403384	PREDICTED: broad-complex core protein isoforms 1/2/3/4/5-like, partial [Bombus terrestris]	1	F:GO:0046872	F:metal ion binding
Cflo_02156--NP_001035356.1_APIME	114	kmr27_comp91542_c10_seq23	1493	102	0.99	2.63408e-68	0.89	0.21	EFN67815	Broad-complex core protein isoform 6 [Camponotus floridanus]	1	F:GO:0046872	F:metal ion binding
Cflo_02264--XP_395000.2_APIME	613	kmr23_comp75139_c0_seq1	2343	613	0.918	0	1	0.79	EFN65549	Maternal embryonic leucine zipper kinase [Camponotus floridanus]	3	F:GO:0005524; F:GO:0004674; P:GO:0006468	F:ATP binding; F:protein serine/threonine kinase activity; P:protein phosphorylation	EC:2.7.11	Transferring phosphorus-containing groups
Cflo_02285--XP_395143.3_APIME	569	kmr27_comp90973_c4_seq1	2274	448	0.978	0	0.79	0.59	EFN64403	UNC93-like protein [Camponotus floridanus]	1	C:GO:0016021	C:integral component of membrane
Cflo_02318--NA	160	kmr23_comp59760_c0_seq1	769	125	0.776	2.5079e-37	0.78	0.51	EFN64435	hypothetical protein EAG_00865 [Camponotus floridanus]
Cflo_02321--FBpp0088307_DROME	1761	kmr25_comp76416_c0_seq1	2535	718	0.939	0	0.41	0.86	EFN64438	hypothetical protein EAG_00868 [Camponotus floridanus]
Cflo_02326--XP_001121096.1_APIME	340	kmr23_comp96081_c0_seq1	1177	322	0.907	0	0.95	0.82	EFN67465	TWiK family of potassium channels protein 18 [Camponotus floridanus]	3	P:GO:0071805; C:GO:0016021; F:GO:0005267	P:potassium ion transmembrane transport; C:integral component of membrane; F:potassium channel activity
Cflo_02328--XP_001121778.1_APIME	175	kmr25_comp77500_c1_seq2	368	64	0.859	2.23336e-30	0.37	0.52	EFN67467	Acetylcholine receptor subunit alpha-like [Camponotus floridanus]	3	P:GO:0034220; C:GO:0016021; F:GO:0005230	P:ion transmembrane transport; C:integral component of membrane; F:extracellular ligand-gated ion channel activity
Cflo_02331--XP_393624.3_APIME	189	kmr29_comp94810_c0_seq2	2678	189	0.974	1.56334e-126	1	0.21	EFN67469	Acetylcholine receptor subunit alpha-like [Camponotus floridanus]	2	P:GO:0006811; C:GO:0016021	P:ion transport; C:integral component of membrane
Cflo_02362--XP_392463.2_APIME	614	kmr27_comp89851_c4_seq1	3404	614	0.866	0	1	0.49	EFN67500	Choline O-acetyltransferase [Camponotus floridanus]	1	F:GO:0016746	F:transferase activity, transferring acyl groups
Cflo_02393--XP_001606916.1_NASVI	46	kmr27_comp84171_c0_seq1	2838	29	1	1.1634e-11	0.63	0.03	EFN61185	hypothetical protein EAG_12744 [Camponotus floridanus]
Cflo_02400--NA	162	kmr25_comp76830_c0_seq2	693	155	0.91	9.40871e-96	0.96	0.67	EFN61192	hypothetical protein EAG_12751 [Camponotus floridanus]
Cflo_02441--NA	93	kmr29_comp86888_c0_seq1	2020	87	0.793	1.48398e-17	0.94	0.13	EFN69834	hypothetical protein EAG_11452 [Camponotus floridanus]
Cflo_02448--XP_391958.3_APIME	461	kmr25_comp84673_c4_seq11	1940	319	0.9	7.07344e-116	0.69	0.5	EFN69840	Transcription factor SOX-2 [Camponotus floridanus]	3	C:GO:0005634; F:GO:0003677; P:GO:0006355	C:nucleus; F:DNA binding; P:regulation of transcription, DNA-templated
Cflo_02449--NA	316	kmr23_comp25600_c0_seq1	155	45	0.733	6.452e-15	0.14	0.88	EFN69841	hypothetical protein EAG_11459 [Camponotus floridanus]
Cflo_02451--NA	257	kmr23_comp31539_c0_seq1	321	69	0.957	8.81486e-40	0.27	0.64	EFN69843	hypothetical protein EAG_11461 [Camponotus floridanus]
Cflo_02524--XP_393969.1_APIME	494	kmr27_comp91396_c0_seq1	1886	482	0.815	0	0.98	0.77	EFN73506	Cytochrome P450 9e2 [Camponotus floridanus]	5	F:GO:0005506; F:GO:0016705; P:GO:0055114; F:GO:0004497; F:GO:0020037	F:iron ion binding; F:oxidoreductase activity, acting on paired donors, with incorporation or reduction of molecular oxygen; P:oxidation-reduction process; F:monooxygenase activity; F:heme binding
Cflo_02585--XP_391979.2_APIME	614	kmr23_comp68315_c1_seq1	2084	614	0.922	0	1	0.87	EFN63631	Glutamate decarboxylase [Camponotus floridanus]	3	F:GO:0030170; P:GO:0019752; F:GO:0016831	F:pyridoxal phosphate binding; P:carboxylic acid metabolic process; F:carboxy-lyase activity
Cflo_02589--XP_001122326.1_APIME	74	kmr27_comp84630_c3_seq2	1219	49	0.98	1.60509e-26	0.66	0.12	EFN63635	hypothetical protein EAG_07413 [Camponotus floridanus]	6	F:GO:0004180; F:GO:0046872; F:GO:0008241; C:GO:0016020; P:GO:0006508; F:GO:0008237	F:carboxypeptidase activity; F:metal ion binding; F:peptidyl-dipeptidase activity; C:membrane; P:proteolysis; F:metallopeptidase activity	EC:3.4.15	Acting on peptide bonds (peptidases)
Cflo_02598--NA	72	kmr23_comp122258_c0_seq1	345	51	0.902	1.05414e-23	0.71	0.44	EFN63644	hypothetical protein EAG_07422 [Camponotus floridanus]
Cflo_02599--XP_001122223.1_APIME	322	kmr25_comp84974_c1_seq1	3231	322	0.87	2.13928e-146	1	0.3	EFN63645	Protein abrupt [Camponotus floridanus]	1	F:GO:0046872	F:metal ion binding
Cflo_02604--NA	410	kmr23_comp37486_c1_seq1	839	109	0.725	2.39162e-42	0.27	0.39	EFN63650	hypothetical protein EAG_07428 [Camponotus floridanus]
Cflo_02616--XP_396411.3_APIME	640	kmr29_comp93677_c1_seq1	2606	605	0.985	0	0.95	0.7	EFN68100	Receptor-type tyrosine-protein phosphatase kappa [Camponotus floridanus]	2	F:GO:0004725; P:GO:0035335	F:protein tyrosine phosphatase activity; P:peptidyl-tyrosine dephosphorylation	EC:3.1.3.16; EC:3.1.3.48; EC:3.1.3.41	Protein-serine/threonine phosphatase; Protein-tyrosine-phosphatase; 4-nitrophenylphosphatase
Cflo_02636--NA	261	kmr23_comp5424_c1_seq1	268	90	0.856	5.58118e-43	0.34	1	EFN68120	hypothetical protein EAG_10704 [Camponotus floridanus]
Cflo_02641--NA	367	kmr23_comp47883_c0_seq1	254	46	0.761	7.41176e-10	0.13	0.51	EFN68124	hypothetical protein EAG_10709 [Camponotus floridanus]
Cflo_02666--XP_393199.2_APIME	411	kmr27_comp86955_c1_seq6	1931	404	0.854	0	0.98	0.63	EFN64989	hypothetical protein EAG_08527 [Camponotus floridanus]
Cflo_02669--XP_001120271.1_APIME	1165	kmr31_comp10805_c0_seq1	3860	1157	0.903	0	0.99	0.92	EFN64992	Dynamin-binding protein [Camponotus floridanus]	5	P:GO:0035023; C:GO:0005737; F:GO:0005089; P:GO:0035556; P:GO:0043547	P:regulation of Rho protein signal transduction; C:cytoplasm; F:Rho guanyl-nucleotide exchange factor activity; P:intracellular signal transduction; P:positive regulation of GTPase activity
Cflo_02677--NA	455	kmr23_comp28892_c0_seq1	786	53	0.811	3.30545e-19	0.12	0.2	EFN65000	hypothetical protein EAG_08538 [Camponotus floridanus]
Cflo_02687--NA	155	kmr25_comp121895_c0_seq1	258	55	0.8	1.01765e-19	0.35	0.6	EFN62529	hypothetical protein EAG_13844 [Camponotus floridanus]
Cflo_02705--XP_001122005.1_APIME	514	kmr23_comp51966_c2_seq1	519	173	0.815	1.83289e-89	0.34	1	EFN62547	WD repeat-containing protein C10orf79 [Camponotus floridanus]
Cflo_02712--XP_001120461.1_APIME	629	kmr23_comp68190_c3_seq1	3385	326	0.951	0	0.52	0.29	EFN62553	Atrial natriuretic peptide receptor A [Camponotus floridanus]	6	F:GO:0005524; P:GO:0006182; C:GO:0016021; F:GO:0004383; F:GO:0004672; P:GO:0006468	F:ATP binding; P:cGMP biosynthetic process; C:integral component of membrane; F:guanylate cyclase activity; F:protein kinase activity; P:protein phosphorylation	EC:4.6.1.2	Guanylate cyclase
Cflo_02821--XP_001601557.1_NASVI	129	kmr29_comp92205_c3_seq5	422	127	1	2.05727e-91	0.98	0.91	EFN66474	hypothetical protein EAG_12624 [Camponotus floridanus]
Cflo_02835--XP_392395.3_APIME	385	kmr23_comp69675_c0_seq1	1406	259	0.996	0	0.67	0.55	EFN72496	Cyclic nucleotide-gated channel rod photoreceptor subunit alpha [Camponotus floridanus]	3	F:GO:0005216; P:GO:0034220; C:GO:0016021	F:ion channel activity; P:ion transmembrane transport; C:integral component of membrane
Cflo_02838--XP_392395.3_APIME	706	kmr25_comp85283_c2_seq1	3171	574	0.857	0	0.81	0.64	EFN72499	Cyclic nucleotide-gated cation channel alpha-3 [Camponotus floridanus]	3	F:GO:0005216; P:GO:0034220; C:GO:0016021	F:ion channel activity; P:ion transmembrane transport; C:integral component of membrane
Cflo_02841--XP_397255.3_APIME	577	kmr29_comp91862_c0_seq4	3155	577	0.946	0	1	0.63	EFN72502	Sodium-independent sulfate anion transporter [Camponotus floridanus]	3	F:GO:0008271; C:GO:0016021; P:GO:1902358	F:secondary active sulfate transmembrane transporter activity; C:integral component of membrane; P:sulfate transmembrane transport
Cflo_02871--XP_391982.3_APIME	99	kmr29_comp94636_c0_seq15	620	78	1	1.63251e-29	0.79	0.38	EFN62796	hypothetical protein EAG_09792 [Camponotus floridanus]
Cflo_02901--XP_564977.1_ANOGA	88	kmr23_comp75922_c0_seq1	382	69	0.913	2.15886e-14	0.78	0.54	EFN62826	hypothetical protein EAG_09822 [Camponotus floridanus]	1	C:GO:0016021	C:integral component of membrane
Cflo_02935--XP_001121741.1_APIME	536	kmr27_comp85186_c3_seq1	343	188	0.904	4.15599e-70	0.35	0.99	EFN67331	hypothetical protein EAG_04792 [Camponotus floridanus]	4	F:GO:0005549; C:GO:0016021; P:GO:0050911; F:GO:0004984	F:odorant binding; C:integral component of membrane; P:detection of chemical stimulus involved in sensory perception of smell; F:olfactory receptor activity
Cflo_02973--XP_624162.1_APIME	489	kmr27_comp83601_c0_seq1	2108	128	0.969	1.38924e-73	0.26	0.18	EFN67367	Zeta-sarcoglycan [Camponotus floridanus]	2	C:GO:0016021; C:GO:0016012	C:integral component of membrane; C:sarcoglycan complex
Cflo_02974--XP_624162.1_APIME	118	kmr23_comp64622_c2_seq1	846	95	0.884	8.08865e-18	0.81	0.34	EFN67368	hypothetical protein EAG_04830 [Camponotus floridanus]	2	C:GO:0016021; C:GO:0016012	C:integral component of membrane; C:sarcoglycan complex
Cflo_02998--NA	110	kmr23_comp118167_c0_seq1	688	26	0.962	5.74958e-09	0.24	0.11	EFN63154	hypothetical protein EAG_12893 [Camponotus floridanus]
Cflo_03028--XP_001121326.1_APIME	415	kmr23_comp57974_c1_seq1	1164	385	0.844	0	0.93	0.99	EFN73170	Putative gustatory receptor 28b [Camponotus floridanus]	3	P:GO:0050909; C:GO:0016021; C:GO:0005886	P:sensory perception of taste; C:integral component of membrane; C:plasma membrane
Cflo_03052--NA	106	kmr23_comp46519_c0_seq1	781	105	0.81	5.40509e-59	0.99	0.4	EFN73194	hypothetical protein EAG_05320 [Camponotus floridanus]
Cflo_03100--NA	111	kmr25_comp83002_c0_seq1	1275	111	0.928	8.86645e-58	1	0.26	EFN66516	hypothetical protein EAG_11010 [Camponotus floridanus]	2	P:GO:0007218; C:GO:0005576	P:neuropeptide signaling pathway; C:extracellular region
Cflo_03115--XP_392502.2_APIME	793	kmr25_comp84587_c0_seq2	3249	793	0.947	0	1	0.73	EFN66531	Membrane metallo-endopeptidase-like 1 [Camponotus floridanus]	4	P:GO:0006508; C:GO:0016021; P:GO:0008355; F:GO:0004222	P:proteolysis; C:integral component of membrane; P:olfactory learning; F:metalloendopeptidase activity	EC:3.4.24	Acting on peptide bonds (peptidases)
Cflo_03120--XP_624422.2_APIME	395	kmr25_comp85728_c0_seq2	1850	395	0.78	0	1	0.69	EFN66536	hypothetical protein EAG_11030 [Camponotus floridanus]
Cflo_03151--XP_396829.1_APIME	676	kmr25_comp86026_c3_seq1	3801	676	0.933	0	1	0.53	EFN61510	Leucine-rich repeat-containing protein 24 [Camponotus floridanus]
Cflo_03155--NA	319	kmr23_comp43783_c0_seq1	266	87	0.943	4.70096e-49	0.27	0.99	EFN61514	hypothetical protein EAG_11750 [Camponotus floridanus]	1	C:GO:0016021	C:integral component of membrane
Cflo_03202--NA	820	kmr29_comp91556_c0_seq2	1599	143	0.832	3.40565e-44	0.17	0.27	EFN71815	hypothetical protein EAG_07566 [Camponotus floridanus]
Cflo_03207--NA	83	kmr29_comp92722_c2_seq2	891	80	0.912	7.63429e-15	0.96	0.27	EFN69234	hypothetical protein EAG_13910 [Camponotus floridanus]
Cflo_03234--XP_393199.2_APIME	317	kmr23_comp68159_c0_seq1	466	139	0.957	1.84871e-93	0.44	0.9	EFN69259	hypothetical protein EAG_13937 [Camponotus floridanus]	1	C:GO:0016021	C:integral component of membrane
Cflo_03247--NA	183	kmr25_comp81124_c1_seq1	2953	66	0.727	1.70396e-21	0.36	0.07	EFN69272	hypothetical protein EAG_13950 [Camponotus floridanus]	1	C:GO:0016021	C:integral component of membrane
Cflo_03321--XP_624970.2_APIME	509	kmr23_comp37002_c0_seq1	1838	508	0.85	0	1	0.83	EFN65491	Putative metabolite transport protein yfiG [Camponotus floridanus]	3	F:GO:0022891; P:GO:0055085; C:GO:0016021	F:substrate-specific transmembrane transporter activity; P:transmembrane transport; C:integral component of membrane
Cflo_03327--XP_001121834.1_APIME	520	kmr23_comp54468_c0_seq1	477	72	0.903	5.43115e-51	0.14	0.47	EFN65497	Glutamate receptor U1 [Camponotus floridanus]	3	C:GO:0016021; P:GO:0035235; F:GO:0004970	C:integral component of membrane; P:ionotropic glutamate receptor signaling pathway; F:ionotropic glutamate receptor activity
Cflo_03329--XP_001121834.1_APIME	521	kmr23_comp54468_c0_seq1	477	72	0.861	1.58335e-43	0.14	0.47	EFN65499	Glutamate receptor, ionotropic kainate 5 [Camponotus floridanus]	3	C:GO:0016021; P:GO:0035235; F:GO:0004970	C:integral component of membrane; P:ionotropic glutamate receptor signaling pathway; F:ionotropic glutamate receptor activity
Cflo_03351--XP_394687.2_APIME	897	kmr27_comp82565_c0_seq2	2081	546	0.91	0	0.61	0.73	EFN63535	Discoidin domain-containing receptor 2 [Camponotus floridanus]	4	F:GO:0005524; P:GO:0018108; F:GO:0004713; C:GO:0016021	F:ATP binding; P:peptidyl-tyrosine phosphorylation; F:protein tyrosine kinase activity; C:integral component of membrane	EC:2.7.10	Transferring phosphorus-containing groups
Cflo_03365--XP_001123098.1_APIME	335	kmr23_comp65572_c0_seq1	885	194	0.876	5.44442e-103	0.58	0.66	EFN71821	Odorant receptor 2a [Camponotus floridanus]	6	F:GO:0005549; P:GO:0007165; C:GO:0016021; P:GO:0050911; C:GO:0005886; F:GO:0004984	F:odorant binding; P:signal transduction; C:integral component of membrane; P:detection of chemical stimulus involved in sensory perception of smell; C:plasma membrane; F:olfactory receptor activity
Cflo_03381--XP_001120632.1_APIME	412	kmr23_comp40569_c0_seq1	1275	269	0.952	1.02579e-110	0.65	0.63	EFN71837	Fork head domain transcription factor slp2 [Camponotus floridanus]	3	F:GO:0003700; P:GO:0006355; F:GO:0043565	F:transcription factor activity, sequence-specific DNA binding; P:regulation of transcription, DNA-templated; F:sequence-specific DNA binding
Cflo_03420--XP_394146.3_APIME	688	kmr27_comp88021_c0_seq1	1684	420	0.948	0	0.61	0.75	EFN63869	Single-minded-like protein 1 [Camponotus floridanus]	8	C:GO:0005634; C:GO:0005667; F:GO:0003677; F:GO:0003700; C:GO:0005737; P:GO:0006351; P:GO:0006355; F:GO:0046983	C:nucleus; C:transcription factor complex; F:DNA binding; F:transcription factor activity, sequence-specific DNA binding; C:cytoplasm; P:transcription, DNA-templated; P:regulation of transcription, DNA-templated; F:protein dimerization activity
Cflo_03424--XP_397511.3_APIME	836	kmr27_comp91439_c1_seq3	3473	832	0.885	0	1	0.72	EFN63873	hypothetical protein EAG_11776 [Camponotus floridanus]	1	C:GO:0016021	C:integral component of membrane
Cflo_03445--XP_001121996.1_APIME	118	kmr23_comp66336_c4_seq1	1409	118	0.983	3.46608e-77	1	0.25	EFN62168	hypothetical protein EAG_12281 [Camponotus floridanus]	4	F:GO:0019825; P:GO:0015671; F:GO:0005344; F:GO:0020037	F:oxygen binding; P:oxygen transport; F:oxygen transporter activity; F:heme binding
Cflo_03475--XP_001599808.1_NASVI	338	kmr25_comp80598_c0_seq2	1226	325	0.911	0	0.96	0.8	EFN65292	DNA fragmentation factor subunit beta [Camponotus floridanus]	4	C:GO:0005634; C:GO:0005737; P:GO:0006309; F:GO:0016787	C:nucleus; C:cytoplasm; P:apoptotic DNA fragmentation; F:hydrolase activity
Cflo_03479--XP_392100.3_APIME	228	kmr23_comp67691_c0_seq1	2862	151	0.947	6.33444e-94	0.66	0.16	EFN65296	hypothetical protein EAG_07231 [Camponotus floridanus]
Cflo_03492--NA	93	kmr25_comp82601_c4_seq1	1087	58	0.724	3.21643e-22	0.62	0.15	EFN65305	hypothetical protein EAG_07244 [Camponotus floridanus]
Cflo_03493--XP_001122652.1_APIME	341	kmr25_comp82601_c4_seq3	651	178	0.972	2.91657e-119	0.52	0.82	EFN65306	Cardioacceleratory peptide receptor [Camponotus floridanus]	3	P:GO:0007186; C:GO:0016021; F:GO:0005000	P:G-protein coupled receptor signaling pathway; C:integral component of membrane; F:vasopressin receptor activity
Cflo_03545--XP_625173.2_APIME	590	kmr29_comp94759_c0_seq4	2074	527	0.755	0	0.89	0.63	EFN64542	Choline/ethanolaminephosphotransferase 1 [Camponotus floridanus]	3	C:GO:0016021; F:GO:0016780; P:GO:0008654	C:integral component of membrane; F:phosphotransferase activity, for other substituted phosphate groups; P:phospholipid biosynthetic process
Cflo_03573--XP_396777.3_APIME	4197	kmr25_comp85353_c1_seq3	7799	3820	0.725	0	0.91	0.96	EFN64568	Spectrin beta chain, brain 4 [Camponotus floridanus]	2	F:GO:0003779; F:GO:0005543	F:actin binding; F:phospholipid binding
Cflo_03590--XP_394358.3_APIME	1710	kmr23_comp68336_c0_seq1	889	408	0.735	1.79674e-154	0.24	0.87	EFN74362	Myelin transcription factor 1 [Camponotus floridanus]	4	C:GO:0005634; F:GO:0003700; F:GO:0008270; P:GO:0006355	C:nucleus; F:transcription factor activity, sequence-specific DNA binding; F:zinc ion binding; P:regulation of transcription, DNA-templated
Cflo_03610--XP_397259.3_APIME	727	kmr23_comp69016_c5_seq1	3261	625	0.984	0	0.86	0.6	EFN63434	Frizzled-2 [Camponotus floridanus]	4	F:GO:0004888; P:GO:0007275; C:GO:0016021; P:GO:0016055	F:transmembrane signaling receptor activity; P:multicellular organism development; C:integral component of membrane; P:Wnt signaling pathway
Cflo_03632--XP_001119966.1_APIME	131	kmr23_comp68157_c2_seq1	1005	131	0.992	1.25562e-61	1	0.39	EFN62917	hypothetical protein EAG_15810 [Camponotus floridanus]	1	F:GO:0003677	F:DNA binding
Cflo_03635--XP_001120032.1_APIME	423	kmr27_comp87999_c0_seq1	1977	423	0.882	0	1	0.64	EFN62920	Kynurenine/alpha-aminoadipate aminotransferase mitochondrial [Camponotus floridanus]	3	F:GO:0030170; F:GO:0008483; P:GO:0009058	F:pyridoxal phosphate binding; F:transaminase activity; P:biosynthetic process
Cflo_03659--XP_001119823.1_APIME	99	kmr23_comp73673_c0_seq1	2607	71	0.944	3.82741e-38	0.72	0.08	EFN72010	hypothetical protein EAG_13961 [Camponotus floridanus]
Cflo_03682--FBpp0112343_DROME	461	kmr31_comp5282_c0_seq1	6175	189	0.847	3.85817e-40	0.41	0.1	EFN72031	hypothetical protein EAG_13983 [Camponotus floridanus]
Cflo_03728--XP_395523.3_APIME	1182	kmr25_comp66457_c0_seq1	2452	586	0.741	0	0.5	0.36	EFN74439	Serine/threonine-protein kinase Nek5 [Camponotus floridanus]	4	F:GO:0005524; C:GO:0016020; F:GO:0004672; P:GO:0006468	F:ATP binding; C:membrane; F:protein kinase activity; P:protein phosphorylation
Cflo_03762--XP_001120989.1_APIME	94	kmr29_comp81821_c3_seq2	278	71	0.944	3.92954e-44	0.76	0.77	EFN64350	hypothetical protein EAG_15934 [Camponotus floridanus]
Cflo_03774--NA	288	kmr29_comp55757_c0_seq1	589	44	0.773	1.83656e-14	0.15	0.24	EFN64188	hypothetical protein EAG_08999 [Camponotus floridanus]
Cflo_03779--XP_001604693.1_NASVI	412	kmr23_comp32420_c0_seq1	535	176	0.898	1.37871e-105	0.43	0.99	EFN64193	Cubilin [Camponotus floridanus]
Cflo_03780--XP_391902.3_APIME	125	kmr25_comp85477_c1_seq2	1618	125	1	2.66361e-80	1	0.23	EFN64194	Whirlin [Camponotus floridanus]
Cflo_03783--XP_393801.3_APIME	538	kmr25_comp85477_c1_seq4	1496	467	0.97	0	0.87	0.93	EFN64197	Whirlin [Camponotus floridanus]
Cflo_03812--XP_001121365.1_APIME	408	kmr23_comp65804_c1_seq1	1295	339	0.979	0	0.83	0.78	EFN70611	Insulin gene enhancer protein ISL-1 [Camponotus floridanus]	4	C:GO:0005634; F:GO:0008270; P:GO:0006355; F:GO:0043565	C:nucleus; F:zinc ion binding; P:regulation of transcription, DNA-templated; F:sequence-specific DNA binding
Cflo_03818--XP_392782.3_APIME	606	kmr23_comp51992_c0_seq1	2725	606	0.909	0	1	0.67	EFN70617	Putative glycerol kinase 3 [Camponotus floridanus]	5	P:GO:0005975; P:GO:0006072; F:GO:0004370; C:GO:0016021; P:GO:0016310	P:carbohydrate metabolic process; P:glycerol-3-phosphate metabolic process; F:glycerol kinase activity; C:integral component of membrane; P:phosphorylation	EC:2.7.1.30	Glycerol kinase
Cflo_03840--XP_001606330.1_NASVI	87	kmr23_comp28905_c0_seq1	279	62	0.903	2.72969e-35	0.71	0.67	EFN70639	hypothetical protein EAG_03828 [Camponotus floridanus]	1	C:GO:0016021	C:integral component of membrane
Cflo_03842--XP_001606330.1_NASVI	60	kmr23_comp28905_c0_seq1	279	60	0.783	3.23677e-29	1	0.65	EFN70641	hypothetical protein EAG_03830 [Camponotus floridanus]	1	C:GO:0016021	C:integral component of membrane
Cflo_03880--XP_001122147.1_APIME	670	kmr27_comp81795_c1_seq1	1314	358	0.983	0	0.53	0.82	EFN70679	Serine/threonine-protein kinase PAK 7 [Camponotus floridanus]	3	F:GO:0005524; F:GO:0004672; P:GO:0006468	F:ATP binding; F:protein kinase activity; P:protein phosphorylation
Cflo_03887--NA	333	kmr23_comp68358_c2_seq1	731	240	0.846	1.05081e-142	0.72	0.99	EFN70686	hypothetical protein EAG_03875 [Camponotus floridanus]
Cflo_03909--XP_394016.2_APIME	202	kmr29_comp93545_c0_seq1	2970	202	0.985	2.58381e-119	1	0.2	EFN70407	Protein lozenge [Camponotus floridanus]	5	C:GO:0005634; F:GO:0003677; F:GO:0005524; F:GO:0003700; P:GO:0006355	C:nucleus; F:DNA binding; F:ATP binding; F:transcription factor activity, sequence-specific DNA binding; P:regulation of transcription, DNA-templated
Cflo_03910--XP_001121886.1_APIME	332	kmr25_comp78374_c0_seq1	1672	332	0.886	2.05181e-164	1	0.6	EFN70408	Segmentation protein Runt [Camponotus floridanus]	5	C:GO:0005634; F:GO:0003677; F:GO:0005524; F:GO:0003700; P:GO:0006355	C:nucleus; F:DNA binding; F:ATP binding; F:transcription factor activity, sequence-specific DNA binding; P:regulation of transcription, DNA-templated
Cflo_03911--XP_394014.2_APIME	576	kmr29_comp93545_c0_seq1	2970	137	0.861	8.12009e-72	0.24	0.14	EFN70409	Protein lozenge [Camponotus floridanus]	5	C:GO:0005634; F:GO:0003677; F:GO:0005524; F:GO:0003700; P:GO:0006355	C:nucleus; F:DNA binding; F:ATP binding; F:transcription factor activity, sequence-specific DNA binding; P:regulation of transcription, DNA-templated
Cflo_03923--XP_001601260.1_NASVI	360	kmr23_comp68807_c2_seq1	1797	275	0.931	2.55e-122	0.76	0.47	EFN70421	hypothetical protein EAG_08716 [Camponotus floridanus]	1	F:GO:0008270	F:zinc ion binding
Cflo_03926--XP_394008.3_APIME	1178	kmr29_comp95943_c0_seq1	6037	1178	0.959	0	1	0.6	EFN70424	Transcription factor castor [Camponotus floridanus]	1	F:GO:0046872	F:metal ion binding
Cflo_03937--XP_392020.3_APIME	537	kmr29_comp94250_c0_seq6	1977	523	0.885	0	0.97	0.8	EFN70435	5'-nucleotidase [Camponotus floridanus]	4	F:GO:0000166; F:GO:0016788; F:GO:0046872; P:GO:0009166	F:nucleotide binding; F:hydrolase activity, acting on ester bonds; F:metal ion binding; P:nucleotide catabolic process
Cflo_03946--XP_001120764.1_APIME	494	kmr25_comp72428_c0_seq2	1561	418	0.916	0	0.85	0.8	EFN70444	Transcription factor MafA [Camponotus floridanus]	5	C:GO:0005634; F:GO:0003700; P:GO:0006351; P:GO:0006355; F:GO:0043565	C:nucleus; F:transcription factor activity, sequence-specific DNA binding; P:transcription, DNA-templated; P:regulation of transcription, DNA-templated; F:sequence-specific DNA binding
Cflo_03986--XP_394056.3_APIME	636	kmr23_comp70058_c0_seq1	1766	564	0.876	0	0.89	0.96	EFN65393	Sodium- and chloride-dependent glycine transporter 2 [Camponotus floridanus]	4	P:GO:0006836; F:GO:0005328; P:GO:0055085; C:GO:0016021	P:neurotransmitter transport; F:neurotransmitter:sodium symporter activity; P:transmembrane transport; C:integral component of membrane
Cflo_04015--NA	72	kmr23_comp59511_c0_seq1	1004	38	0.711	9.42388e-10	0.53	0.12	EFN70137	hypothetical protein EAG_01454 [Camponotus floridanus]
Cflo_04018--XP_396507.2_APIME	301	kmr29_comp93958_c0_seq2	1096	301	0.944	0	1	0.82	EFN70140	Alpha-tocopherol transfer protein-like [Camponotus floridanus]	3	P:GO:0006810; C:GO:0005622; F:GO:0005215	P:transport; C:intracellular; F:transporter activity
Cflo_04033--NP_001035326.1_APIME	592	kmr23_comp65180_c0_seq1	1878	574	0.821	0	0.97	0.92	EFN70155	Maltase 1 [Camponotus floridanus]	2	P:GO:0005975; F:GO:0003824	P:carbohydrate metabolic process; F:catalytic activity
Cflo_04047--XP_001119997.1_APIME	423	kmr25_comp57041_c0_seq1	1756	422	0.791	0	1	0.73	EFN70169	hypothetical protein EAG_01486 [Camponotus floridanus]	1	C:GO:0016021	C:integral component of membrane
Cflo_04054--NA	319	kmr23_comp78872_c0_seq1	1369	22	0.818	2.64232e-09	0.07	0.05	EFN70176	hypothetical protein EAG_01493 [Camponotus floridanus]
Cflo_04083--XP_001120384.1_APIME	110	kmr23_comp33040_c0_seq1	917	109	0.936	6.82164e-70	0.99	0.36	EFN71229	Krueppel-like factor 11 [Camponotus floridanus]	2	F:GO:0003676; F:GO:0046872	F:nucleic acid binding; F:metal ion binding
Cflo_04147--XP_624745.1_APIME	1012	kmr23_comp68049_c0_seq1	3424	1012	0.94	0	1	0.89	EFN74573	Bumetanide-sensitive sodium-(potassium)-chloride cotransporter [Camponotus floridanus]	3	F:GO:0015377; P:GO:1902476; C:GO:0016021	F:cation:chloride symporter activity; P:chloride transmembrane transport; C:integral component of membrane
Cflo_04160--XP_391946.3_APIME	346	kmr25_comp81997_c0_seq1	1462	346	0.89	0	1	0.71	EFN74586	Cytochrome P450 306a1 [Camponotus floridanus]	5	F:GO:0005506; F:GO:0016705; P:GO:0055114; F:GO:0004497; F:GO:0020037	F:iron ion binding; F:oxidoreductase activity, acting on paired donors, with incorporation or reduction of molecular oxygen; P:oxidation-reduction process; F:monooxygenase activity; F:heme binding
Cflo_04162--XP_393886.1_APIME	253	kmr25_comp53659_c0_seq1	1087	252	0.913	1.45512e-167	1	0.7	EFN74588	Zinc metalloproteinase nas-14 [Camponotus floridanus]	3	F:GO:0008270; P:GO:0006508; F:GO:0004222	F:zinc ion binding; P:proteolysis; F:metalloendopeptidase activity	EC:3.4.24	Acting on peptide bonds (peptidases)
Cflo_04170--XP_001120914.1_APIME	101	kmr29_comp80084_c0_seq1	771	101	1	2.81844e-59	1	0.39	XP_003701973	PREDICTED: zinc finger protein 91-like [Megachile rotundata]
Cflo_04171--XP_001600719.1_NASVI	257	kmr23_comp67787_c0_seq1	629	154	0.948	2.32854e-64	0.6	0.72	EFN74596	hypothetical protein EAG_11120 [Camponotus floridanus]
Cflo_04190--XP_001120165.1_APIME	308	kmr29_comp60849_c0_seq1	926	282	0.894	5.79252e-177	0.92	0.94	EFN69693	hypothetical protein EAG_11823 [Camponotus floridanus]
Cflo_04219--XP_001122832.1_APIME	510	kmr29_comp90394_c1_seq4	1946	318	0.874	0	0.62	0.49	EFN63712	Cytochrome P450 302a1, mitochondrial [Camponotus floridanus]	5	F:GO:0005506; F:GO:0016705; P:GO:0055114; F:GO:0004497; F:GO:0020037	F:iron ion binding; F:oxidoreductase activity, acting on paired donors, with incorporation or reduction of molecular oxygen; P:oxidation-reduction process; F:monooxygenase activity; F:heme binding
Cflo_04229--XP_001599441.1_NASVI	176	kmr23_comp72406_c0_seq1	5775	171	0.877	2.12604e-44	0.97	0.09	EFN63721	hypothetical protein EAG_09649 [Camponotus floridanus]
Cflo_04258--XP_393753.2_APIME	612	kmr27_comp86840_c0_seq4	2165	611	0.92	0	1	0.85	EFN62962	Low affinity cationic amino acid transporter 2 [Camponotus floridanus]	3	C:GO:0016021; F:GO:0015171; P:GO:0003333	C:integral component of membrane; F:amino acid transmembrane transporter activity; P:amino acid transmembrane transport
Cflo_04274--XP_001122034.1_APIME	186	kmr23_comp60298_c0_seq1	2171	186	1	2.87058e-130	1	0.26	EFN62978	Neuronal calcium sensor 2 [Camponotus floridanus]	1	F:GO:0005509	F:calcium ion binding
Cflo_04311--XP_623488.2_APIME	159	kmr27_comp90496_c2_seq12	614	84	0.917	9.42108e-34	0.53	0.41	EFN61685	Protein bric-a-brac 2 [Camponotus floridanus]
Cflo_04314--XP_623488.2_APIME	85	kmr25_comp85056_c4_seq5	1289	79	0.873	6.53324e-41	0.93	0.19	EFN61688	hypothetical protein EAG_12692 [Camponotus floridanus]	1	F:GO:0046872	F:metal ion binding
Cflo_04322--XP_001121814.1_APIME	151	kmr29_comp92791_c2_seq2	1149	151	0.987	2.9727e-82	1	0.39	EFN61696	hypothetical protein EAG_12700 [Camponotus floridanus]
Cflo_04324--XP_001603065.1_NASVI	372	kmr25_comp57269_c1_seq2	490	110	0.982	1.22878e-54	0.3	0.67	EFN61698	hypothetical protein EAG_12702 [Camponotus floridanus]
Cflo_04345--XP_396359.2_APIME	374	kmr23_comp76274_c0_seq1	1672	373	0.906	0	1	0.67	EFN72460	Arrestin-like protein [Camponotus floridanus]	1	P:GO:0007165	P:signal transduction
Cflo_04393--XP_393692.3_APIME	601	kmr23_comp79184_c0_seq1	2727	601	0.839	0	1	0.67	EFN60526	Protein hunchback [Camponotus floridanus]	7	F:GO:0003676; C:GO:0005634; P:GO:0040034; F:GO:0046872; P:GO:0006351; F:GO:0000981; P:GO:0006357	F:nucleic acid binding; C:nucleus; P:regulation of development, heterochronic; F:metal ion binding; P:transcription, DNA-templated; F:RNA polymerase II transcription factor activity, sequence-specific DNA binding; P:regulation of transcription from RNA polymerase II promoter
Cflo_04403--XP_396290.2_APIME	1008	kmr23_comp68077_c2_seq1	2227	602	0.98	0	0.6	0.81	EFN66248	Alpha-mannosidase 2 [Camponotus floridanus]	4	F:GO:0004559; F:GO:0008270; P:GO:0006013; F:GO:0030246	F:alpha-mannosidase activity; F:zinc ion binding; P:mannose metabolic process; F:carbohydrate binding	EC:3.2.1.24	Alpha-mannosidase
Cflo_04412--NA	209	kmr25_comp85749_c4_seq1	598	35	0.886	1.37594e-12	0.17	0.18	EFN66257	hypothetical protein EAG_13736 [Camponotus floridanus]
Cflo_04467--XP_396640.3_APIME	556	kmr25_comp86018_c0_seq2	2689	498	0.902	0	0.9	0.56	EFN61945	Myosin light chain kinase, smooth muscle [Camponotus floridanus]	3	F:GO:0005524; F:GO:0004674; P:GO:0006468	F:ATP binding; F:protein serine/threonine kinase activity; P:protein phosphorylation	EC:2.7.11	Transferring phosphorus-containing groups
Cflo_04542--XP_001122620.1_APIME	317	kmr31_comp9489_c0_seq1	2316	317	0.719	1.2151e-103	1	0.42	EFN67953	hypothetical protein EAG_10490 [Camponotus floridanus]
Cflo_04543--XP_001122630.1_APIME	172	kmr25_comp83395_c0_seq1	3758	172	0.733	5.55789e-79	1	0.13	EFN67954	Cytochrome b5 [Camponotus floridanus]	2	F:GO:0046872; F:GO:0020037	F:metal ion binding; F:heme binding
Cflo_04585--NP_001011637.1_APIME	74	kmr25_comp78471_c0_seq3	973	74	0.851	5.82387e-37	1	0.23	EFN67995	Twist-related protein 1 [Camponotus floridanus]	1	F:GO:0046983	F:protein dimerization activity
Cflo_04609--NA	109	kmr25_comp84312_c6_seq3	983	48	1	8.92276e-16	0.44	0.15	EFN70260	hypothetical protein EAG_11929 [Camponotus floridanus]
Cflo_04610--XP_001121074.1_APIME	435	kmr29_comp95565_c3_seq14	1062	82	0.707	2.25933e-26	0.19	0.17	EFN70261	Neuronal acetylcholine receptor subunit alpha-7 [Camponotus floridanus]	5	P:GO:0034220; C:GO:0016021; F:GO:0005230; C:GO:0045202; C:GO:0005886	P:ion transmembrane transport; C:integral component of membrane; F:extracellular ligand-gated ion channel activity; C:synapse; C:plasma membrane
Cflo_04614--XP_623408.2_APIME	129	kmr27_comp90523_c3_seq18	597	128	0.977	5.7471e-87	0.99	0.64	EFN70265	Acetylcholine receptor subunit alpha-type acr-16 [Camponotus floridanus]	2	P:GO:0006811; C:GO:0016021	P:ion transport; C:integral component of membrane
Cflo_04616--XP_393285.1_APIME	293	kmr29_comp95609_c3_seq2	2651	293	1	0	1	0.33	EFZ20550	hypothetical protein SINV_10469 [Solenopsis invicta]	3	F:GO:0005524; F:GO:0004674; P:GO:0006468	F:ATP binding; F:protein serine/threonine kinase activity; P:protein phosphorylation	EC:2.7.11	Transferring phosphorus-containing groups
Cflo_04624--XP_396471.3_APIME	337	kmr23_comp36738_c0_seq1	1949	337	0.982	0	1	0.52	EFN71681	Potassium channel subfamily K member 9 [Camponotus floridanus]	3	P:GO:0071805; C:GO:0016021; F:GO:0005267	P:potassium ion transmembrane transport; C:integral component of membrane; F:potassium channel activity
Cflo_04627--XP_394893.2_APIME	1091	kmr23_comp61763_c2_seq1	819	268	0.866	8.45208e-129	0.25	0.99	EFN71684	Adenosine receptor A2b [Camponotus floridanus]	3	F:GO:0004930; P:GO:0007186; C:GO:0016021	F:G-protein coupled receptor activity; P:G-protein coupled receptor signaling pathway; C:integral component of membrane
Cflo_04628--XP_394031.1_APIME	580	kmr27_comp91171_c2_seq5	3376	574	0.739	0	0.99	0.51	EFN71685	ATP-binding cassette sub-family G member 4 [Camponotus floridanus]	3	F:GO:0016887; F:GO:0005524; C:GO:0016021	F:ATPase activity; F:ATP binding; C:integral component of membrane	EC:3.6.1.3; EC:3.6.1.15	Adenosinetriphosphatase; Nucleoside-triphosphate phosphatase
Cflo_04643--XP_396634.1_APIME	149	kmr25_comp78406_c0_seq1	1544	142	0.986	3.59278e-78	0.95	0.29	EFN71700	G1/S-specific cyclin-D3 [Camponotus floridanus]	1	P:GO:0007049	P:cell cycle
Cflo_04646--NA	85	kmr23_comp28874_c0_seq1	1066	79	0.835	1.56491e-34	0.93	0.23	EFN80244	Transposable element Tcb1 transposase [Harpegnathos saltator]
Cflo_04672--NA	91	kmr27_comp90317_c2_seq1	896	91	0.714	5.91409e-37	1	0.28	EFN72368	hypothetical protein EAG_16085 [Camponotus floridanus]	2	F:GO:0003676; F:GO:0046983	F:nucleic acid binding; F:protein dimerization activity
Cflo_04688--XP_394205.3_APIME	1081	kmr23_comp69634_c3_seq1	2867	924	0.844	0	0.85	0.98	EFN72383	Transmembrane channel-like protein 3 [Camponotus floridanus]	1	C:GO:0016021	C:integral component of membrane
Cflo_04739--XP_396636.3_APIME	863	kmr27_comp89655_c0_seq1	3200	863	0.795	0	1	0.86	EFN61445	Spondin-1 [Camponotus floridanus]	2	F:GO:0004867; P:GO:0010951	F:serine-type endopeptidase inhibitor activity; P:negative regulation of endopeptidase activity
Cflo_04755--XP_393053.2_APIME	739	kmr23_comp61509_c1_seq1	819	68	0.868	6.80922e-33	0.09	0.25	EFN67447	hypothetical protein EAG_01777 [Camponotus floridanus]
Cflo_04767--XP_001122321.1_APIME	273	kmr23_comp63402_c1_seq1	819	254	0.984	7.41416e-160	0.93	0.93	EFN67458	Class B basic helix-loop-helix protein 5 [Camponotus floridanus]	1	F:GO:0046983	F:protein dimerization activity
Cflo_04789--XP_624658.2_APIME	592	kmr23_comp69456_c1_seq1	2105	552	0.897	0	0.93	0.79	EFN66636	Sodium-independent sulfate anion transporter [Camponotus floridanus]	3	F:GO:0008271; C:GO:0016021; P:GO:1902358	F:secondary active sulfate transmembrane transporter activity; C:integral component of membrane; P:sulfate transmembrane transport
Cflo_04807--NA	80	kmr25_comp85336_c4_seq5	3472	80	0.975	4.04464e-47	1	0.07	EFN71408	hypothetical protein EAG_14751 [Camponotus floridanus]	1	C:GO:0016021	C:integral component of membrane
Cflo_04814--XP_001120804.1_APIME	240	kmr23_comp35549_c0_seq1	1374	224	0.964	2.78532e-158	0.93	0.49	EFN71415	Protein tipE [Camponotus floridanus]	1	C:GO:0016021	C:integral component of membrane
Cflo_04821--XP_001121435.1_APIME	65	kmr23_comp39320_c0_seq1	273	65	0.923	2.90859e-37	1	0.71	EFN71422	hypothetical protein EAG_14765 [Camponotus floridanus]
Cflo_04855--NA	289	kmr23_comp84537_c0_seq1	711	51	0.902	1.32667e-16	0.18	0.22	EFN60986	hypothetical protein EAG_12180 [Camponotus floridanus]
Cflo_04864--XP_396491.1_APIME	313	kmr23_comp89689_c0_seq1	1268	299	0.946	0	0.96	0.71	EFN60994	Probable G-protein coupled receptor 52 [Camponotus floridanus]	3	F:GO:0004930; P:GO:0007186; C:GO:0016021	F:G-protein coupled receptor activity; P:G-protein coupled receptor signaling pathway; C:integral component of membrane
Cflo_04892--XP_624940.1_APIME	437	kmr23_comp31231_c0_seq1	589	193	0.912	1.63018e-124	0.44	0.98	EFN70935	UPF0526 protein [Camponotus floridanus]
Cflo_04945--XP_392592.2_APIME	242	kmr23_comp87715_c0_seq1	1224	218	0.835	3.68694e-106	0.9	0.53	EFN60280	CD63 antigen [Camponotus floridanus]	1	C:GO:0016021	C:integral component of membrane
Cflo_04967--XP_001121416.1_APIME	2199	kmr27_comp90910_c1_seq2	7092	2171	0.935	0	0.99	0.92	EFN67005	Protein crumbs [Camponotus floridanus]	2	F:GO:0005509; C:GO:0016021	F:calcium ion binding; C:integral component of membrane
Cflo_05019--XP_396996.2_APIME	292	kmr27_comp86746_c1_seq4	1492	279	0.957	0	0.96	0.56	EFN68640	Neurotrimin [Camponotus floridanus]
Cflo_05026--NA	290	kmr27_comp77809_c0_seq2	325	62	0.887	1.12412e-28	0.21	0.58	EFN68647	hypothetical protein EAG_01218 [Camponotus floridanus]
Cflo_05027--XP_397272.2_APIME	48	kmr25_comp85932_c1_seq3	1848	48	0.708	2.6943e-17	1	0.08	EFN68648	hypothetical protein EAG_01219 [Camponotus floridanus]	4	F:GO:0005506; F:GO:0016705; P:GO:0055114; F:GO:0020037	F:iron ion binding; F:oxidoreductase activity, acting on paired donors, with incorporation or reduction of molecular oxygen; P:oxidation-reduction process; F:heme binding
Cflo_05037--XP_397077.3_APIME	362	kmr25_comp79874_c0_seq3	1328	312	0.929	3.78348e-164	0.86	0.71	EFN63289	Octopamine receptor beta-3R [Camponotus floridanus]	3	F:GO:0004930; P:GO:0007186; C:GO:0016021	F:G-protein coupled receptor activity; P:G-protein coupled receptor signaling pathway; C:integral component of membrane
Cflo_05038--XP_397077.3_APIME	211	kmr23_comp65300_c4_seq1	385	115	0.974	1.2896e-76	0.55	0.9	EFN63290	Octopamine receptor beta-3R [Camponotus floridanus]	4	P:GO:0007186; C:GO:0016021; P:GO:0007210; F:GO:0004993	P:G-protein coupled receptor signaling pathway; C:integral component of membrane; P:serotonin receptor signaling pathway; F:G-protein coupled serotonin receptor activity
Cflo_05041--NA	415	kmr23_comp59996_c1_seq1	372	90	0.767	5.82536e-45	0.22	0.73	EFN63293	hypothetical protein EAG_03139 [Camponotus floridanus]	1	C:GO:0016021	C:integral component of membrane
Cflo_05068--NA	216	kmr25_comp62468_c1_seq1	402	46	0.761	2.06463e-15	0.21	0.34	EFN63316	hypothetical protein EAG_03164 [Camponotus floridanus]
Cflo_05095--XP_001121583.1_APIME	56	kmr25_comp81197_c0_seq1	1833	56	1	9.42129e-34	1	0.09	XP_003493314	PREDICTED: hypothetical protein LOC100743763 [Bombus impatiens]
Cflo_05107--XP_624183.1_APIME	664	kmr29_comp96091_c1_seq18	4057	664	0.97	0	1	0.49	EFN61060	Xenotropic and polytropic retrovirus receptor 1 [Camponotus floridanus]	1	C:GO:0016021	C:integral component of membrane
Cflo_05133--XP_393969.1_APIME	459	kmr29_comp92769_c0_seq2	5407	459	0.73	0	1	0.27	EFN61084	Cytochrome P450 9e2 [Camponotus floridanus]	6	F:GO:0005506; F:GO:0016705; C:GO:0016021; P:GO:0055114; F:GO:0004497; F:GO:0020037	F:iron ion binding; F:oxidoreductase activity, acting on paired donors, with incorporation or reduction of molecular oxygen; C:integral component of membrane; P:oxidation-reduction process; F:monooxygenase activity; F:heme binding
Cflo_05135--XP_393969.1_APIME	497	kmr29_comp92769_c0_seq2	5407	497	0.825	0	1	0.28	EFN61085	Cytochrome P450 9e2 [Camponotus floridanus]	6	F:GO:0005506; F:GO:0016705; C:GO:0016021; P:GO:0055114; F:GO:0004497; F:GO:0020037	F:iron ion binding; F:oxidoreductase activity, acting on paired donors, with incorporation or reduction of molecular oxygen; C:integral component of membrane; P:oxidation-reduction process; F:monooxygenase activity; F:heme binding
Cflo_05136--XP_393969.1_APIME	504	kmr29_comp92769_c0_seq2	5407	501	0.824	0	0.99	0.28	EFN61084	Cytochrome P450 9e2 [Camponotus floridanus]	6	F:GO:0005506; F:GO:0016705; C:GO:0016021; P:GO:0055114; F:GO:0004497; F:GO:0020037	F:iron ion binding; F:oxidoreductase activity, acting on paired donors, with incorporation or reduction of molecular oxygen; C:integral component of membrane; P:oxidation-reduction process; F:monooxygenase activity; F:heme binding
Cflo_05137--XP_393969.1_APIME	490	kmr31_comp11149_c0_seq1	2100	490	0.814	0	1	0.71	EFN61086	Cytochrome P450 9e2 [Camponotus floridanus]	6	F:GO:0005506; F:GO:0016705; C:GO:0016021; P:GO:0055114; F:GO:0004497; F:GO:0020037	F:iron ion binding; F:oxidoreductase activity, acting on paired donors, with incorporation or reduction of molecular oxygen; C:integral component of membrane; P:oxidation-reduction process; F:monooxygenase activity; F:heme binding
Cflo_05138--XP_393969.1_APIME	672	kmr31_comp11149_c0_seq1	2100	667	0.816	2.47641e-180	0.99	0.58	EFN61087	Cytochrome P450 9e2 [Camponotus floridanus]	6	F:GO:0005506; F:GO:0016705; C:GO:0016021; P:GO:0055114; F:GO:0004497; F:GO:0020037	F:iron ion binding; F:oxidoreductase activity, acting on paired donors, with incorporation or reduction of molecular oxygen; C:integral component of membrane; P:oxidation-reduction process; F:monooxygenase activity; F:heme binding
Cflo_05140--XP_392001.1_APIME	276	kmr31_comp11149_c0_seq1	2100	275	0.793	1.30807e-149	1	0.4	EFN61087	Cytochrome P450 9e2 [Camponotus floridanus]	6	F:GO:0005506; F:GO:0016705; C:GO:0016021; P:GO:0055114; F:GO:0004497; F:GO:0020037	F:iron ion binding; F:oxidoreductase activity, acting on paired donors, with incorporation or reduction of molecular oxygen; C:integral component of membrane; P:oxidation-reduction process; F:monooxygenase activity; F:heme binding
Cflo_05150--XP_624184.2_APIME	659	kmr27_comp82632_c0_seq1	2684	659	0.926	0	1	0.72	EFN60666	Cationic amino acid transporter 4 [Camponotus floridanus]	3	C:GO:0016021; F:GO:0015171; P:GO:0003333	C:integral component of membrane; F:amino acid transmembrane transporter activity; P:amino acid transmembrane transport
Cflo_05153--XP_394735.2_APIME	687	kmr29_comp79760_c2_seq1	958	477	0.738	0	0.69	0.99	EFN60669	Tip elongation aberrant protein 1 [Camponotus floridanus]
Cflo_05168--NA	83	kmr25_comp72948_c0_seq1	958	30	0.967	1.22218e-12	0.36	0.09	EFN60679	hypothetical protein EAG_14902 [Camponotus floridanus]
Cflo_05174--XP_625212.2_APIME	928	kmr25_comp84885_c4_seq1	2953	910	0.935	0	0.98	0.97	EFN60684	Potassium voltage-gated channel subfamily H member 8 [Camponotus floridanus]	7	F:GO:0000155; F:GO:0005249; P:GO:0071805; P:GO:0000160; C:GO:0016021; P:GO:0023014; C:GO:0005622	F:phosphorelay sensor kinase activity; F:voltage-gated potassium channel activity; P:potassium ion transmembrane transport; P:phosphorelay signal transduction system; C:integral component of membrane; P:signal transduction by protein phosphorylation; C:intracellular	EC:2.7.13.3	Histidine kinase
Cflo_05193--NA	252	kmr27_comp80871_c0_seq1	584	68	0.735	1.34806e-22	0.27	0.37	EFN63931	hypothetical protein EAG_03027 [Camponotus floridanus]	1	C:GO:0016021	C:integral component of membrane
Cflo_05215--XP_001122324.1_APIME	858	kmr23_comp58030_c0_seq1	538	179	0.911	6.37782e-112	0.21	1	EFN61095	Zinc finger protein 271 [Camponotus floridanus]	2	F:GO:0003676; F:GO:0008270	F:nucleic acid binding; F:zinc ion binding
Cflo_05226--XP_392974.3_APIME	357	kmr25_comp68724_c1_seq1	667	219	0.836	1.3656e-109	0.61	1	EFN61104	hypothetical protein EAG_05830 [Camponotus floridanus]
Cflo_05231--XP_394870.3_APIME	948	kmr25_comp83225_c0_seq9	3381	875	0.877	0	0.92	0.84	EFN61108	Endothelin-converting enzyme 1 [Camponotus floridanus]	3	P:GO:0006508; C:GO:0016021; F:GO:0004222	P:proteolysis; C:integral component of membrane; F:metalloendopeptidase activity	EC:3.4.24	Acting on peptide bonds (peptidases)
Cflo_05254--XP_001121063.1_APIME	118	kmr27_comp88959_c10_seq5	844	118	1	6.06008e-85	1	0.42	EFN63574	hypothetical protein EAG_02373 [Camponotus floridanus]
Cflo_05275--XP_395473.3_APIME	503	kmr25_comp82142_c0_seq1	1554	460	0.813	0	0.91	0.89	EFN63502	Sugar transporter ERD6-like 6 [Camponotus floridanus]	4	P:GO:0055085; F:GO:0022857; C:GO:0016021; P:GO:0008643	P:transmembrane transport; F:transmembrane transporter activity; C:integral component of membrane; P:carbohydrate transport
Cflo_05291--XP_001121479.1_APIME	627	kmr23_comp69008_c6_seq1	2208	604	0.715	0	0.96	0.88	EFN63516	Probable RNA-binding protein 46 [Camponotus floridanus]	2	F:GO:0000166; F:GO:0003676	F:nucleotide binding; F:nucleic acid binding
Cflo_05316--NA	454	kmr23_comp69810_c3_seq1	237	32	0.844	3.12287e-08	0.07	0.41	EFN63751	hypothetical protein EAG_12057 [Camponotus floridanus]
Cflo_05329--XP_319560.3_ANOGA	39	kmr25_comp84809_c2_seq5	738	37	0.973	4.68752e-18	0.95	0.15	EFN66572	hypothetical protein EAG_15570 [Camponotus floridanus]	5	C:GO:0016459; F:GO:0005524; F:GO:0003779; P:GO:0007165; F:GO:0003774	C:myosin complex; F:ATP binding; F:actin binding; P:signal transduction; F:motor activity	EC:3.6.1.15	Nucleoside-triphosphate phosphatase
Cflo_05330--XP_396622.3_APIME	2156	kmr29_comp92131_c0_seq1	7362	2156	0.97	0	1	0.87	EFN66573	Myosin-I heavy chain [Camponotus floridanus]	5	C:GO:0016459; F:GO:0005524; F:GO:0003779; P:GO:0007165; F:GO:0003774	C:myosin complex; F:ATP binding; F:actin binding; P:signal transduction; F:motor activity	EC:3.6.1.15	Nucleoside-triphosphate phosphatase
Cflo_05336--XP_394557.2_APIME	33	kmr27_comp84049_c0_seq6	249	22	1	5.81016e-08	0.67	0.27	EFN66579	hypothetical protein EAG_15577 [Camponotus floridanus]
Cflo_05366--XP_001120155.1_APIME	477	kmr27_comp89971_c0_seq1	3210	472	0.845	0	0.99	0.43	EFN66609	Zinc finger protein 14-like protein [Camponotus floridanus]	2	F:GO:0003676; F:GO:0046872	F:nucleic acid binding; F:metal ion binding
Cflo_05372--FBpp0089046_DROME	129	kmr25_comp85183_c4_seq13	3306	122	0.836	3.00325e-12	0.95	0.11	EFN63847	hypothetical protein EAG_10277 [Camponotus floridanus]	5	P:GO:0055085; F:GO:0005262; P:GO:0006816; C:GO:0016021; F:GO:0005244	P:transmembrane transport; F:calcium channel activity; P:calcium ion transport; C:integral component of membrane; F:voltage-gated ion channel activity
Cflo_05376--NA	148	kmr23_comp79925_c0_seq1	1132	114	0.86	1.2265e-64	0.77	0.3	EFN63851	hypothetical protein EAG_10281 [Camponotus floridanus]	1	C:GO:0016021	C:integral component of membrane
Cflo_05392--NA	429	kmr27_comp39106_c0_seq1	821	38	0.947	2.54903e-15	0.09	0.14	EFN69645	hypothetical protein EAG_11982 [Camponotus floridanus]
Cflo_05402--FBpp0070606_DROME	656	kmr23_comp60081_c0_seq1	545	188	0.718	8.50138e-65	0.29	1	EFN69655	hypothetical protein EAG_11992 [Camponotus floridanus]	4	C:GO:0016021; P:GO:0006486; F:GO:0008378; C:GO:0000139	C:integral component of membrane; P:protein glycosylation; F:galactosyltransferase activity; C:Golgi membrane
Cflo_05442--XP_001121767.1_APIME	860	kmr27_comp40890_c0_seq1	2861	724	0.884	0	0.84	0.76	EFN67073	Zinc finger protein 263 [Camponotus floridanus]	2	F:GO:0003676; F:GO:0046872	F:nucleic acid binding; F:metal ion binding
Cflo_05461--XP_001603534.1_NASVI	265	kmr27_comp89896_c0_seq4	488	114	0.877	5.77165e-44	0.43	0.69	EFN70967	hypothetical protein EAG_06787 [Camponotus floridanus]
Cflo_05463--XP_396254.3_APIME	218	kmr25_comp83797_c1_seq2	864	215	0.991	6.74729e-145	0.99	0.75	EFN70969	hypothetical protein EAG_06789 [Camponotus floridanus]
Cflo_05470--NA	599	kmr23_comp148142_c0_seq1	280	87	0.759	2.57602e-36	0.15	0.97	EFN74796	hypothetical protein EAG_05103 [Camponotus floridanus]
Cflo_05476--XP_001120751.1_APIME	268	kmr25_comp68201_c0_seq1	1963	249	0.775	2.56112e-129	0.93	0.37	EFN74801	hypothetical protein EAG_05109 [Camponotus floridanus]	1	C:GO:0016021	C:integral component of membrane
Cflo_05481--XP_394482.3_APIME	536	kmr25_comp81578_c0_seq14	584	126	1	2.55259e-84	0.24	0.65	EFN63326	Dachshund-like protein 1 [Camponotus floridanus]
Cflo_05553--XP_394063.3_APIME	79	kmr23_comp65765_c0_seq1	318	64	0.938	1.76189e-37	0.81	0.6	EFN65319	Hypertrehalosaemic prohormone [Camponotus floridanus]	2	C:GO:0005576; F:GO:0005179	C:extracellular region; F:hormone activity
Cflo_05558--XP_394060.3_APIME	432	kmr27_comp90369_c1_seq38	2224	378	0.857	0	0.88	0.87	EFN65324	Ornithine aminotransferase, mitochondrial [Camponotus floridanus]	2	F:GO:0030170; F:GO:0008483	F:pyridoxal phosphate binding; F:transaminase activity
Cflo_05567--XP_625223.1_APIME	129	kmr25_comp82669_c0_seq1	1642	67	0.955	1.47231e-15	0.52	0.12	EFN65331	Complexin [Camponotus floridanus]	2	P:GO:0006836; F:GO:0019905	P:neurotransmitter transport; F:syntaxin binding
Cflo_05568--BGIBMGA006856-PA_BOMMO	1319	kmr23_comp65155_c2_seq1	412	135	0.756	3.95037e-57	0.1	1	EFN65332	hypothetical protein EAG_14923 [Camponotus floridanus]	2	C:GO:0016020; F:GO:0016798	C:membrane; F:hydrolase activity, acting on glycosyl bonds
Cflo_05587--XP_001599730.1_NASVI	320	kmr23_comp106985_c0_seq1	391	59	0.831	1.54992e-26	0.18	0.44	EFN63019	hypothetical protein EAG_00723 [Camponotus floridanus]	6	F:GO:0005524; F:GO:0004702; C:GO:0016021; P:GO:0007178; P:GO:0023014; F:GO:0004675	F:ATP binding; F:signal transducer, downstream of receptor, with serine/threonine kinase activity; C:integral component of membrane; P:transmembrane receptor protein serine/threonine kinase signaling pathway; P:signal transduction by protein phosphorylation; F:transmembrane receptor protein serine/threonine kinase activity	EC:2.7.11	Transferring phosphorus-containing groups
Cflo_05589--XP_391989.2_APIME	318	kmr27_comp88874_c2_seq2	2173	313	0.997	0	0.98	0.43	EFN63021	TGF-beta receptor type-1 [Camponotus floridanus]	6	F:GO:0005524; F:GO:0004702; C:GO:0016021; P:GO:0007178; P:GO:0023014; F:GO:0004675	F:ATP binding; F:signal transducer, downstream of receptor, with serine/threonine kinase activity; C:integral component of membrane; P:transmembrane receptor protein serine/threonine kinase signaling pathway; P:signal transduction by protein phosphorylation; F:transmembrane receptor protein serine/threonine kinase activity	EC:2.7.11	Transferring phosphorus-containing groups
Cflo_05605--NP_001011625.1_APIME	543	kmr27_comp89813_c0_seq1	2598	543	0.976	0	1	0.63	EFN71611	Acetylcholine receptor subunit alpha-like 2 [Camponotus floridanus]	5	C:GO:0045211; P:GO:0098655; C:GO:0016021; C:GO:0030054; F:GO:0005230	C:postsynaptic membrane; P:cation transmembrane transport; C:integral component of membrane; C:cell junction; F:extracellular ligand-gated ion channel activity
Cflo_05617--XP_001120664.1_APIME	532	kmr23_comp69125_c0_seq1	543	89	0.798	1.29258e-56	0.17	0.49	EFN71623	Sodium channel protein Nach [Camponotus floridanus]	3	F:GO:0005272; C:GO:0016021; P:GO:0035725	F:sodium channel activity; C:integral component of membrane; P:sodium ion transmembrane transport
Cflo_05631--XP_001602419.1_NASVI	1690	kmr23_comp59614_c1_seq1	5866	1690	0.705	0	1	0.92	EFN71636	Mediator of DNA damage checkpoint protein 1 [Camponotus floridanus]
Cflo_05653--XP_394755.3_APIME	552	kmr27_comp76192_c0_seq1	781	234	0.979	1.17265e-120	0.42	0.9	EFN74316	Cell death activator CIDE-B [Camponotus floridanus]	2	P:GO:0006915; C:GO:0005622	P:apoptotic process; C:intracellular
Cflo_05681--NA	248	kmr25_comp75803_c4_seq1	350	111	0.892	3.39417e-66	0.45	0.97	EFN73152	hypothetical protein EAG_15251 [Camponotus floridanus]
Cflo_05688--XP_394552.3_APIME	495	kmr29_comp96504_c1_seq8	4441	486	0.969	0	0.98	0.33	EFN72580	Neuronal growth regulator 1 [Camponotus floridanus]	1	C:GO:0016021	C:integral component of membrane
Cflo_05731--XP_623757.2_APIME	339	kmr25_comp37106_c0_seq1	466	155	0.987	2.75655e-56	0.46	1	EFN64249	Homeobox protein OTX1 [Camponotus floridanus]	3	C:GO:0005634; P:GO:0006355; F:GO:0043565	C:nucleus; P:regulation of transcription, DNA-templated; F:sequence-specific DNA binding
Cflo_05762--XP_394511.3_APIME	115	kmr29_comp93944_c0_seq5	320	72	0.972	4.43195e-44	0.63	0.68	EFN74778	hypothetical protein EAG_10187 [Camponotus floridanus]
Cflo_05770--NA	248	kmr23_comp165357_c0_seq1	193	37	0.973	8.08127e-18	0.15	0.58	EFN74786	hypothetical protein EAG_10195 [Camponotus floridanus]
Cflo_05854--XP_396287.2_APIME	268	kmr25_comp85159_c9_seq1	1290	242	0.975	1.52418e-167	0.9	0.56	EFN73246	hypothetical protein EAG_11405 [Camponotus floridanus]
Cflo_05873--XP_001121937.1_APIME	386	kmr23_comp36584_c1_seq1	606	173	0.971	1.89934e-86	0.45	0.85	EFN60485	Transcription factor SOX-21 [Camponotus floridanus]
Cflo_05874--XP_001121937.1_APIME	218	kmr23_comp85058_c0_seq1	958	78	0.782	1.68234e-36	0.36	0.24	EFN60486	Transcription factor Sox-19b [Camponotus floridanus]
Cflo_05941--XP_394132.3_APIME	270	kmr23_comp67599_c0_seq1	1760	208	0.928	3.99843e-137	0.77	0.35	EFN73560	Neurotrimin [Camponotus floridanus]
Cflo_05943--XP_397461.2_APIME	171	kmr25_comp80880_c0_seq2	1457	164	0.97	5.40695e-112	0.96	0.34	EFN73562	Lachesin [Camponotus floridanus]
Cflo_05944--XP_397461.2_APIME	150	kmr25_comp80880_c0_seq1	1502	40	0.85	3.88257e-14	0.27	0.08	EFN73563	hypothetical protein EAG_11375 [Camponotus floridanus]
Cflo_05946--XP_394771.3_APIME	1088	kmr23_comp68943_c2_seq1	1716	572	0.885	0	0.53	1	EFN63207	Insulin receptor [Camponotus floridanus]	5	F:GO:0005524; P:GO:0018108; F:GO:0004714; C:GO:0016021; P:GO:0007169	F:ATP binding; P:peptidyl-tyrosine phosphorylation; F:transmembrane receptor protein tyrosine kinase activity; C:integral component of membrane; P:transmembrane receptor protein tyrosine kinase signaling pathway	EC:2.7.10; EC:2.7.10.1; EC:2.7.11	Transferring phosphorus-containing groups; Receptor protein-tyrosine kinase; Transferring phosphorus-containing groups
Cflo_05967--XP_623304.1_APIME	920	kmr25_comp84667_c6_seq3	4042	920	0.98	0	1	0.68	EFN63225	Rap1 GTPase-activating protein 1 [Camponotus floridanus]	3	P:GO:0051056; F:GO:0005096; P:GO:0043547	P:regulation of small GTPase mediated signal transduction; F:GTPase activator activity; P:positive regulation of GTPase activity
Cflo_06010--XP_623443.2_APIME	119	kmr27_comp87971_c3_seq10	424	97	0.794	5.62057e-46	0.82	0.89	EFN69047	Glucose dehydrogenase [acceptor] [Camponotus floridanus]
Cflo_06017--XP_001119965.1_APIME	223	kmr29_comp95570_c0_seq2	4360	204	0.917	2.69677e-84	0.91	0.14	EFN64179	hypothetical protein EAG_10247 [Camponotus floridanus]
Cflo_06019--XP_001119901.1_APIME	109	kmr25_comp84957_c1_seq2	3868	106	1	1.412e-55	0.97	0.08	EFN64181	hypothetical protein EAG_10249 [Camponotus floridanus]
Cflo_06022--XP_001119901.1_APIME	135	kmr25_comp84957_c1_seq2	3868	135	0.911	2.2003e-68	1	0.1	EFN64183	hypothetical protein EAG_10252 [Camponotus floridanus]
Cflo_06056--XP_394231.2_APIME	319	kmr23_comp35227_c0_seq1	1415	318	0.943	4.20547e-158	1	0.68	EFZ22874	hypothetical protein SINV_11981 [Solenopsis invicta]	3	F:GO:0004930; P:GO:0007186; C:GO:0016021	F:G-protein coupled receptor activity; P:G-protein coupled receptor signaling pathway; C:integral component of membrane
Cflo_06058--NA	31	kmr29_comp68773_c0_seq2	149	28	0.75	6.28924e-08	0.9	0.57	EFN64617	hypothetical protein EAG_04575 [Camponotus floridanus]
Cflo_06079--XP_396660.2_APIME	104	kmr29_comp91044_c3_seq3	1679	104	0.962	2.19043e-50	1	0.19	EFN69879	Orexin receptor type 2 [Camponotus floridanus]	3	F:GO:0004930; P:GO:0007186; C:GO:0016021	F:G-protein coupled receptor activity; P:G-protein coupled receptor signaling pathway; C:integral component of membrane
Cflo_06110--NA	159	kmr23_comp28874_c0_seq1	1066	159	0.83	1.08808e-84	1	0.45	EFN62284	Transposable element Tc1 transposase [Camponotus floridanus]
Cflo_06113--XP_001122626.1_APIME	103	kmr27_comp84973_c1_seq2	2442	103	0.981	5.94363e-65	1	0.33	EFN66036	Roundabout-like protein 2 [Camponotus floridanus]
Cflo_06297--XP_623264.2_APIME	121	kmr23_comp57846_c1_seq1	568	85	0.918	3.89444e-44	0.7	0.45	EFN71154	hypothetical protein EAG_05391 [Camponotus floridanus]
Cflo_06331--XP_001120087.1_APIME	62	kmr27_comp89207_c2_seq1	1450	62	1	2.88127e-37	1	0.13	EFZ17065	hypothetical protein SINV_00588 [Solenopsis invicta]	3	C:GO:0005634; P:GO:0006355; F:GO:0043565	C:nucleus; P:regulation of transcription, DNA-templated; F:sequence-specific DNA binding
Cflo_06332--XP_001120208.1_APIME	262	kmr23_comp65893_c2_seq1	460	84	0.905	3.16665e-49	0.32	0.55	EFN71990	hypothetical protein EAG_07900 [Camponotus floridanus]
Cflo_06381--XP_001122024.1_APIME	2907	kmr27_comp86805_c0_seq1	6988	2220	0.8	0	0.76	0.96	EFN63981	E3 SUMO-protein ligase RanBP2 [Camponotus floridanus]	4	F:GO:0008270; P:GO:0046907; C:GO:0005622; F:GO:0016874	F:zinc ion binding; P:intracellular transport; C:intracellular; F:ligase activity
Cflo_06394--XP_624892.2_APIME	793	kmr23_comp53084_c0_seq1	3390	793	0.926	0	1	0.7	EFN61557	Neural cell adhesion molecule 2 [Camponotus floridanus]	1	C:GO:0016021	C:integral component of membrane
Cflo_06402--XP_392388.3_APIME	128	kmr29_comp95854_c2_seq6	2243	83	0.88	6.41064e-43	0.65	0.11	EFN61563	hypothetical protein EAG_02619 [Camponotus floridanus]
Cflo_06407--XP_392436.3_APIME	131	kmr25_comp82786_c0_seq5	1566	86	0.884	6.64791e-18	0.66	0.16	EFN61347	hypothetical protein EAG_02002 [Camponotus floridanus]	1	C:GO:0016021	C:integral component of membrane
Cflo_06416--NA	224	kmr27_comp91617_c1_seq1	999	124	0.903	1.31078e-69	0.55	0.38	EFN61356	hypothetical protein EAG_02011 [Camponotus floridanus]
Cflo_06433--XP_397506.2_APIME	106	kmr23_comp52525_c1_seq1	1234	101	0.921	1.8897e-59	0.95	0.25	EFN64274	hypothetical protein EAG_08926 [Camponotus floridanus]	1	C:GO:0016021	C:integral component of membrane
Cflo_06459--XP_001600939.1_NASVI	125	kmr23_comp165593_c0_seq1	195	33	0.848	9.40978e-13	0.26	0.51	EFN66712	hypothetical protein EAG_00702 [Camponotus floridanus]	4	F:GO:0005549; C:GO:0016021; P:GO:0050911; F:GO:0004984	F:odorant binding; C:integral component of membrane; P:detection of chemical stimulus involved in sensory perception of smell; F:olfactory receptor activity
Cflo_06466--XP_392530.2_APIME	213	kmr25_comp82679_c0_seq1	2533	213	0.986	1.34044e-147	1	0.25	EFN66719	Protein sidekick-1 [Camponotus floridanus]
Cflo_06471--XP_001120327.1_APIME	265	kmr27_comp79351_c0_seq1	1204	260	0.858	4.09361e-123	0.98	0.67	EFN73975	Enhancer of split mgamma protein [Camponotus floridanus]	6	C:GO:0005634; F:GO:0003677; P:GO:0006351; C:GO:0016021; P:GO:0006355; F:GO:0046983	C:nucleus; F:DNA binding; P:transcription, DNA-templated; C:integral component of membrane; P:regulation of transcription, DNA-templated; F:protein dimerization activity
Cflo_06473--XP_394848.3_APIME	269	kmr25_comp84809_c6_seq1	1605	131	0.87	1.97938e-69	0.49	0.26	EFN73977	Protein gooseberry-neuro [Camponotus floridanus]	5	C:GO:0005634; F:GO:0003677; P:GO:0006351; P:GO:0007275; P:GO:0006355	C:nucleus; F:DNA binding; P:transcription, DNA-templated; P:multicellular organism development; P:regulation of transcription, DNA-templated
Cflo_06474--XP_394848.3_APIME	321	kmr23_comp55980_c1_seq1	466	155	0.89	8.6945e-75	0.48	1	EFN73978	Protein gooseberry-neuro [Camponotus floridanus]	3	C:GO:0005634; P:GO:0006355; F:GO:0043565	C:nucleus; P:regulation of transcription, DNA-templated; F:sequence-specific DNA binding
Cflo_06515--NA	252	kmr23_comp35136_c0_seq1	333	84	0.94	7.65944e-55	0.33	0.76	EFN62649	hypothetical protein EAG_16391 [Camponotus floridanus]	1	F:GO:0003676	F:nucleic acid binding
Cflo_06516--XP_397198.3_APIME	842	kmr25_comp83960_c3_seq1	1571	421	0.976	0	0.5	0.8	EFN62650	SCY1-like protein 2 [Camponotus floridanus]	3	F:GO:0005524; F:GO:0004672; P:GO:0006468	F:ATP binding; F:protein kinase activity; P:protein phosphorylation
Cflo_06547--XP_393915.3_APIME	331	kmr23_comp68968_c0_seq1	1910	331	0.988	0	1	0.52	EFN60775	5-hydroxytryptamine receptor [Camponotus floridanus]	3	F:GO:0004930; P:GO:0007186; C:GO:0016021	F:G-protein coupled receptor activity; P:G-protein coupled receptor signaling pathway; C:integral component of membrane
Cflo_06567--XP_001121271.1_APIME	606	kmr29_comp96394_c2_seq57	4895	604	0.894	0	1	0.37	EFN62066	Uncharacterized sodium-dependent transporter CG3252 [Camponotus floridanus]	4	P:GO:0006836; F:GO:0005328; P:GO:0055085; C:GO:0016021	P:neurotransmitter transport; F:neurotransmitter:sodium symporter activity; P:transmembrane transport; C:integral component of membrane
Cflo_06568--XP_001121299.1_APIME	630	kmr29_comp91864_c0_seq1	2682	630	0.878	0	1	0.7	EFN62067	Uncharacterized sodium-dependent transporter CG3252 [Camponotus floridanus]	4	P:GO:0006836; F:GO:0005328; P:GO:0055085; C:GO:0016021	P:neurotransmitter transport; F:neurotransmitter:sodium symporter activity; P:transmembrane transport; C:integral component of membrane
Cflo_06576--XP_001122134.1_APIME	571	kmr23_comp56935_c0_seq1	1554	495	0.844	0	0.87	0.96	EFN62075	Sodium-independent sulfate anion transporter [Camponotus floridanus]	3	F:GO:0008271; C:GO:0016021; P:GO:1902358	F:secondary active sulfate transmembrane transporter activity; C:integral component of membrane; P:sulfate transmembrane transport
Cflo_06588--XP_392741.3_APIME	1389	kmr27_comp91226_c0_seq23	7859	1351	0.978	0	0.97	0.55	EFN62087	Triple functional domain protein [Camponotus floridanus]	3	P:GO:0035023; F:GO:0005089; P:GO:0043547	P:regulation of Rho protein signal transduction; F:Rho guanyl-nucleotide exchange factor activity; P:positive regulation of GTPase activity
Cflo_06606--NP_001011583.1_APIME	126	kmr25_comp81577_c0_seq4	1399	106	0.83	6.60728e-59	0.84	0.23	EFN64585	Ejaculatory bulb-specific protein 3 [Camponotus floridanus]
Cflo_06640--XP_394031.1_APIME	578	kmr27_comp91171_c2_seq5	3376	573	0.728	0	0.99	0.51	EFN73704	ATP-binding cassette sub-family G member 1 [Camponotus floridanus]	3	F:GO:0016887; F:GO:0005524; C:GO:0016021	F:ATPase activity; F:ATP binding; C:integral component of membrane	EC:3.6.1.3; EC:3.6.1.15	Adenosinetriphosphatase; Nucleoside-triphosphate phosphatase
Cflo_06642--XP_001604081.1_NASVI	848	kmr29_comp88862_c0_seq1	1602	158	0.899	3.07626e-72	0.19	0.29	EFN73706	hypothetical protein EAG_15141 [Camponotus floridanus]	1	C:GO:0016021	C:integral component of membrane
Cflo_06643--XP_394032.3_APIME	105	kmr29_comp82709_c0_seq1	784	75	0.893	2.01859e-31	0.71	0.29	EFN73707	hypothetical protein EAG_15142 [Camponotus floridanus]
Cflo_06663--XP_623657.2_APIME	581	kmr29_comp95979_c1_seq3	2613	579	0.888	0	1	0.66	EFN71927	Monocarboxylate transporter 3 [Camponotus floridanus]	2	P:GO:0055085; C:GO:0016021	P:transmembrane transport; C:integral component of membrane
Cflo_06676--NA	707	kmr23_comp31658_c0_seq1	748	244	0.791	5.46383e-107	0.35	1	EFN71940	hypothetical protein EAG_03945 [Camponotus floridanus]	1	C:GO:0016021	C:integral component of membrane
Cflo_06692--XP_001120321.1_APIME	101	kmr23_comp28997_c0_seq1	372	79	0.899	3.77534e-45	0.78	0.64	EFN71956	hypothetical protein EAG_03961 [Camponotus floridanus]
Cflo_06706--NA	784	kmr23_comp52086_c1_seq1	523	173	0.844	1.76631e-91	0.22	0.99	EFN71548	hypothetical protein EAG_14226 [Camponotus floridanus]
Cflo_06709--XP_001119946.1_APIME	87	kmr23_comp110530_c0_seq1	464	87	0.897	2.26284e-50	1	0.56	EFN71551	hypothetical protein EAG_14229 [Camponotus floridanus]	1	C:GO:0016021	C:integral component of membrane
Cflo_06723--XP_396568.2_APIME	427	kmr27_comp89482_c0_seq8	2779	427	0.841	0	1	0.49	EFN71564	Proton-coupled amino acid transporter 1 [Camponotus floridanus]	1	C:GO:0016021	C:integral component of membrane
Cflo_06751--NA	322	kmr23_comp50058_c0_seq1	226	39	0.846	9.84674e-14	0.12	0.52	EFN66235	hypothetical protein EAG_05041 [Camponotus floridanus]
Cflo_06761--XP_394182.3_APIME	474	kmr23_comp46330_c0_seq1	2405	353	0.79	0	0.74	0.44	EFN72216	Synaptic vesicle glycoprotein 2A [Camponotus floridanus]	3	P:GO:0055085; F:GO:0022857; C:GO:0016021	P:transmembrane transport; F:transmembrane transporter activity; C:integral component of membrane
Cflo_06807--XP_001599083.1_NASVI	104	kmr29_comp97043_c0_seq1	3879	104	0.769	1.92845e-49	1	0.08	EFN79227	Probable DNA polymerase [Harpegnathos saltator]	4	F:GO:0003676; F:GO:0003824; P:GO:0006259; P:GO:0034645	F:nucleic acid binding; F:catalytic activity; P:DNA metabolic process; P:cellular macromolecule biosynthetic process
Cflo_06828--XP_001120644.1_APIME	955	kmr23_comp73266_c0_seq1	3341	938	0.859	0	0.98	0.84	EFN69967	Tripartite motif-containing protein 71 [Camponotus floridanus]
Cflo_06845--NA	33	kmr23_comp57878_c0_seq1	352	33	0.848	2.36791e-13	1	0.28	EFN71386	hypothetical protein EAG_06685 [Camponotus floridanus]
Cflo_06849--XP_624318.1_APIME	267	kmr23_comp66292_c0_seq1	1958	267	0.989	1.50068e-156	1	0.41	EFN71390	GTP-binding protein Di-Ras2 [Camponotus floridanus]	4	F:GO:0005525; P:GO:0007264; C:GO:0016020; C:GO:0005622	F:GTP binding; P:small GTPase mediated signal transduction; C:membrane; C:intracellular
Cflo_06853--XP_396560.3_APIME	107	kmr23_comp62687_c0_seq1	3359	107	0.991	6.98023e-68	1	0.25	EFN71394	Zinc finger protein 41 [Camponotus floridanus]	2	F:GO:0003676; F:GO:0046872	F:nucleic acid binding; F:metal ion binding
Cflo_06856--XP_395751.2_APIME	475	kmr23_comp72604_c0_seq1	2996	211	0.938	0	0.44	0.26	EFN71397	Tektin-3 [Camponotus floridanus]
Cflo_06858--XP_001120687.1_APIME	105	kmr29_comp89859_c1_seq2	359	84	0.881	1.49309e-44	0.8	0.74	EFN71399	Longitudinals lacking protein, isoforms A/B/D/L [Camponotus floridanus]	2	F:GO:0003676; F:GO:0046872	F:nucleic acid binding; F:metal ion binding
Cflo_06863--XP_394135.2_APIME	467	kmr25_comp79680_c0_seq1	940	291	0.979	0	0.62	0.95	EFN64917	LIM/homeobox protein Lhx3 [Camponotus floridanus]	4	C:GO:0005634; F:GO:0008270; P:GO:0006355; F:GO:0043565	C:nucleus; F:zinc ion binding; P:regulation of transcription, DNA-templated; F:sequence-specific DNA binding
Cflo_06895--XP_001603479.1_NASVI	411	kmr23_comp66535_c0_seq1	307	101	0.842	1.01355e-54	0.25	1	EFN63586	hypothetical protein EAG_04860 [Camponotus floridanus]	3	F:GO:0003676; F:GO:0046872; F:GO:0016787	F:nucleic acid binding; F:metal ion binding; F:hydrolase activity
Cflo_06896--XP_394821.3_APIME	470	kmr25_comp85943_c4_seq14	1675	444	0.923	0	0.94	0.75	EFN63587	Peripheral plasma membrane protein CASK [Camponotus floridanus]	3	F:GO:0005524; F:GO:0004672; P:GO:0006468	F:ATP binding; F:protein kinase activity; P:protein phosphorylation
Cflo_06897--NA	315	kmr23_comp60727_c2_seq1	162	36	0.917	7.64219e-13	0.11	0.67	EFN63588	hypothetical protein EAG_04862 [Camponotus floridanus]
Cflo_06908--XP_001121136.1_APIME	104	kmr27_comp86692_c0_seq4	1696	84	0.738	3.97968e-38	0.81	0.15	EFN63599	hypothetical protein EAG_04873 [Camponotus floridanus]
Cflo_06910--XP_397016.2_APIME	445	kmr31_comp7094_c0_seq1	2757	445	0.872	0	1	0.48	EFN60596	Solute carrier family 2, facilitated glucose transporter member 8 [Camponotus floridanus]	4	F:GO:0022891; P:GO:0055085; C:GO:0016021; P:GO:0008643	F:substrate-specific transmembrane transporter activity; P:transmembrane transport; C:integral component of membrane; P:carbohydrate transport
Cflo_06911--XP_397017.2_APIME	104	kmr27_comp91105_c0_seq2	876	104	0.942	1.78166e-63	1	0.36	EFN60597	Solute carrier family 2, facilitated glucose transporter member 8 [Camponotus floridanus]	4	F:GO:0022891; P:GO:0055085; C:GO:0016021; P:GO:0008643	F:substrate-specific transmembrane transporter activity; P:transmembrane transport; C:integral component of membrane; P:carbohydrate transport
Cflo_06925--NA	298	kmr29_comp88646_c1_seq1	2778	259	0.807	1.13191e-130	0.87	0.35	EFN60611	WD repeat-containing protein 5-like protein [Camponotus floridanus]
Cflo_06945--NA	115	kmr25_comp79309_c1_seq1	2060	60	0.883	1.67981e-27	0.52	0.09	EFN66369	hypothetical protein EAG_07726 [Camponotus floridanus]
Cflo_06963--XP_001122187.1_APIME	1066	kmr25_comp83618_c1_seq4	1155	384	0.938	0	0.36	1	EFN66386	MutS protein-like protein 4 [Camponotus floridanus]	3	F:GO:0005524; P:GO:0006298; F:GO:0030983	F:ATP binding; P:mismatch repair; F:mismatched DNA binding
Cflo_06997--XP_001121480.1_APIME	115	kmr27_comp90642_c0_seq1	8305	115	0.765	4.07344e-31	1	0.04	EFN68540	hypothetical protein EAG_07140 [Camponotus floridanus]
Cflo_07022--XP_625212.2_APIME	103	kmr27_comp91623_c7_seq64	2521	103	0.99	4.62687e-67	1	0.12	EFN68565	Potassium voltage-gated channel subfamily H member 7 [Camponotus floridanus]
Cflo_07096--XP_001120179.1_APIME	183	kmr25_comp85453_c1_seq5	802	140	0.95	2.03899e-74	0.77	0.52	EFN65345	Neuroligin-4, X-linked [Camponotus floridanus]
Cflo_07143--XP_392024.2_APIME	478	kmr31_comp1131_c0_seq2	3650	478	0.941	0	1	0.39	EFN62868	Sugar transporter ERD6-like 6 [Camponotus floridanus]	4	F:GO:0022891; P:GO:0055085; C:GO:0016021; P:GO:0008643	F:substrate-specific transmembrane transporter activity; P:transmembrane transport; C:integral component of membrane; P:carbohydrate transport
Cflo_07147--XP_001122557.1_APIME	484	kmr25_comp76907_c0_seq2	1207	273	0.857	6.5253e-169	0.56	0.68	EFN62872	Sugar transporter ERD6-like 6 [Camponotus floridanus]	4	F:GO:0022891; P:GO:0055085; C:GO:0016021; P:GO:0008643	F:substrate-specific transmembrane transporter activity; P:transmembrane transport; C:integral component of membrane; P:carbohydrate transport
Cflo_07149--XP_625190.1_APIME	1055	kmr23_comp68169_c2_seq1	4047	1055	0.96	0	1	0.78	EFN62874	Ankyrin repeat domain-containing protein 28 [Camponotus floridanus]
Cflo_07185--NA	570	kmr23_comp68452_c0_seq1	1258	320	0.869	0	0.56	0.78	EFN70206	hypothetical protein EAG_14009 [Camponotus floridanus]
Cflo_07186--XP_623932.2_APIME	217	kmr23_comp55781_c1_seq1	2230	217	0.986	2.12363e-138	1	0.29	EFN70207	Kv channel-interacting protein 2 [Camponotus floridanus]	1	F:GO:0005509	F:calcium ion binding
Cflo_07228--NA	93	kmr23_comp64752_c6_seq1	469	59	0.814	6.01737e-27	0.63	0.38	EFN69152	hypothetical protein EAG_14410 [Camponotus floridanus]
Cflo_07247--XP_001120790.1_APIME	746	kmr23_comp81596_c0_seq1	2523	724	0.885	0	0.97	0.86	EFN68903	L-ascorbate oxidase [Camponotus floridanus]	3	F:GO:0005507; F:GO:0016491; P:GO:0055114	F:copper ion binding; F:oxidoreductase activity; P:oxidation-reduction process
Cflo_07290--NA	799	kmr23_comp56122_c2_seq1	583	61	0.754	4.67284e-19	0.08	0.32	EFN73115	hypothetical protein EAG_02041 [Camponotus floridanus]
Cflo_07310--XP_393184.3_APIME	1566	kmr23_comp46715_c0_seq1	4764	1524	0.963	0	0.97	0.97	EFN73134	Uncharacterized WD repeat-containing protein alr3466 [Camponotus floridanus]	1	F:GO:0005524	F:ATP binding
Cflo_07311--XP_396499.3_APIME	574	kmr23_comp51775_c0_seq1	1965	574	0.925	0	1	0.88	EFN73135	Bifunctional 3'-phosphoadenosine 5'-phosphosulfate synthetase [Camponotus floridanus]	5	F:GO:0005524; F:GO:0004020; F:GO:0004781; P:GO:0016310; P:GO:0000103	F:ATP binding; F:adenylylsulfate kinase activity; F:sulfate adenylyltransferase (ATP) activity; P:phosphorylation; P:sulfate assimilation	EC:2.7.7.4; EC:2.7.1.25	Sulfate adenylyltransferase; Adenylyl-sulfate kinase
Cflo_07342--XP_001599950.1_NASVI	215	kmr29_comp93795_c5_seq8	633	99	0.747	1.69961e-44	0.46	0.47	EFN63789	hypothetical protein EAG_10126 [Camponotus floridanus]	1	F:GO:0003676	F:nucleic acid binding
Cflo_07346--XP_001120679.1_APIME	489	kmr25_comp84692_c1_seq1	3273	488	0.762	0	1	0.45	EFN63792	G-protein coupled receptor Mth2 [Camponotus floridanus]	4	F:GO:0004930; P:GO:0007186; C:GO:0016021; P:GO:0007166	F:G-protein coupled receptor activity; P:G-protein coupled receptor signaling pathway; C:integral component of membrane; P:cell surface receptor signaling pathway
Cflo_07412--XP_392080.3_APIME	327	kmr29_comp90090_c0_seq2	1207	294	0.724	6.92537e-153	0.9	0.72	EFN73265	Putative trypsin-6 [Camponotus floridanus]	2	P:GO:0006508; F:GO:0004252	P:proteolysis; F:serine-type endopeptidase activity	EC:3.4.21	Acting on peptide bonds (peptidases)
Cflo_07415--XP_392082.3_APIME	566	kmr23_comp73188_c0_seq1	2766	562	0.888	0	0.99	0.57	EFN73268	Angiotensin-converting enzyme [Camponotus floridanus]	6	F:GO:0004180; F:GO:0046872; F:GO:0008241; C:GO:0016020; P:GO:0006508; F:GO:0008237	F:carboxypeptidase activity; F:metal ion binding; F:peptidyl-dipeptidase activity; C:membrane; P:proteolysis; F:metallopeptidase activity	EC:3.4.15	Acting on peptide bonds (peptidases)
Cflo_07448--XP_396453.2_APIME	404	kmr23_comp69024_c1_seq1	1628	404	0.894	0	1	0.75	EFN72797	hypothetical protein EAG_03736 [Camponotus floridanus]	1	F:GO:0008080	F:N-acetyltransferase activity
Cflo_07453--NA	81	kmr25_comp85766_c6_seq1	5408	44	0.795	1.26863e-23	0.54	0.02	EFN71482	hypothetical protein EAG_14421 [Camponotus floridanus]
Cflo_07455--NP_001011594.1_APIME	246	kmr27_comp78732_c0_seq1	682	141	1	6.2911e-86	0.57	0.62	EFN71484	Octopamine receptor [Camponotus floridanus]	3	F:GO:0004930; P:GO:0007186; C:GO:0016021	F:G-protein coupled receptor activity; P:G-protein coupled receptor signaling pathway; C:integral component of membrane
Cflo_07458--XP_394103.1_APIME	664	kmr23_comp56502_c0_seq1	2328	604	0.935	0	0.91	0.77	EFN71487	Sodium-coupled monocarboxylate transporter 2 [Camponotus floridanus]	3	P:GO:0055085; C:GO:0016021; F:GO:0005215	P:transmembrane transport; C:integral component of membrane; F:transporter activity
Cflo_07465--XP_001121985.1_APIME	267	kmr23_comp76347_c0_seq1	1579	235	0.915	7.85587e-121	0.88	0.45	EFN71493	hypothetical protein EAG_14433 [Camponotus floridanus]	1	C:GO:0016021	C:integral component of membrane
Cflo_07479--XP_392099.3_APIME	1186	kmr27_comp91615_c9_seq28	4878	1139	0.947	0	0.96	0.7	EFN64630	Neural-cadherin [Camponotus floridanus]	4	F:GO:0005509; C:GO:0016021; P:GO:0007156; C:GO:0005886	F:calcium ion binding; C:integral component of membrane; P:homophilic cell adhesion via plasma membrane adhesion molecules; C:plasma membrane
Cflo_07499--XP_394420.3_APIME	2471	kmr23_comp63401_c0_seq1	1795	794	0.772	0	0.32	0.99	EFN68626	cGMP-dependent protein kinase, isozyme 1 [Camponotus floridanus]	6	F:GO:0005524; F:GO:0042626; P:GO:0055085; C:GO:0016021; F:GO:0004692; P:GO:0006468	F:ATP binding; F:ATPase activity, coupled to transmembrane movement of substances; P:transmembrane transport; C:integral component of membrane; F:cGMP-dependent protein kinase activity; P:protein phosphorylation	EC:2.7.11; EC:2.7.11.12; EC:3.6.1.3; EC:3.6.1.15	Transferring phosphorus-containing groups; cGMP-dependent protein kinase; Adenosinetriphosphatase; Nucleoside-triphosphate phosphatase
Cflo_07583--NA	125	kmr23_comp30397_c0_seq1	242	27	0.852	1.56823e-06	0.22	0.34	EFN70105	hypothetical protein EAG_07500 [Camponotus floridanus]
Cflo_07602--XP_623569.1_APIME	890	kmr25_comp84658_c2_seq5	3482	877	0.889	0	0.99	0.77	EFN64302	Cubilin [Camponotus floridanus]	1	C:GO:0016021	C:integral component of membrane
Cflo_07622--XP_624478.1_APIME	547	kmr23_comp30011_c0_seq1	704	129	0.992	9.20316e-111	0.24	0.59	EFN61834	Cytosolic carboxypeptidase 6 [Camponotus floridanus]	3	F:GO:0008270; F:GO:0004181; P:GO:0006508	F:zinc ion binding; F:metallocarboxypeptidase activity; P:proteolysis	EC:3.4.17	Acting on peptide bonds (peptidases)
Cflo_07659--XP_001120670.1_APIME	316	kmr25_comp84063_c0_seq1	1366	316	0.896	0	1	0.63	EFN69543	hypothetical protein EAG_03359 [Camponotus floridanus]
Cflo_07688--XP_001122560.1_APIME	216	kmr27_comp90877_c1_seq2	2269	143	0.853	1.27211e-50	0.66	0.13	EFN66339	T-box transcription factor TBX2 [Camponotus floridanus]	5	C:GO:0005634; F:GO:0003677; F:GO:0003700; P:GO:0006351; P:GO:0006355	C:nucleus; F:DNA binding; F:transcription factor activity, sequence-specific DNA binding; P:transcription, DNA-templated; P:regulation of transcription, DNA-templated
Cflo_07707--XP_393944.1_APIME	460	kmr23_comp65356_c0_seq1	661	158	0.981	6.7415e-109	0.34	0.72	EFN68727	Protein escargot [Camponotus floridanus]	2	F:GO:0003676; F:GO:0046872	F:nucleic acid binding; F:metal ion binding
Cflo_07710--NA	680	kmr29_comp96522_c0_seq1	1623	463	0.737	0	0.68	0.89	EFN73326	hypothetical protein EAG_05558 [Camponotus floridanus]
Cflo_07723--XP_392596.2_APIME	264	kmr23_comp79994_c0_seq1	991	264	0.913	2.66239e-170	1	0.8	EFN70746	15-hydroxyprostaglandin dehydrogenase [NAD+] [Camponotus floridanus]	2	P:GO:0055114; F:GO:0004022	P:oxidation-reduction process; F:alcohol dehydrogenase (NAD) activity	EC:1.1.1.1	Alcohol dehydrogenase
Cflo_07752--NA	81	kmr29_comp95804_c0_seq8	399	67	0.836	1.06036e-31	0.83	0.5	EFN70774	hypothetical protein EAG_04749 [Camponotus floridanus]
Cflo_07875--NA	89	kmr29_comp95688_c0_seq1	2657	37	0.838	1.01176e-13	0.42	0.04	EFN74739	hypothetical protein EAG_09741 [Camponotus floridanus]
Cflo_07894--NA	171	kmr25_comp84611_c6_seq3	2337	68	0.985	2.61815e-37	0.4	0.09	EFN74133	hypothetical protein EAG_07941 [Camponotus floridanus]
Cflo_07915--XP_392255.3_APIME	772	kmr29_comp96377_c0_seq4	5254	769	0.919	0	1	0.45	EFN67280	Semaphorin-1A [Camponotus floridanus]	1	C:GO:0016020	C:membrane
Cflo_07937--XP_392566.3_APIME	366	kmr25_comp78455_c1_seq1	734	115	0.913	3.12872e-73	0.31	0.47	EFN66751	Thioredoxin domain-containing protein 3-like protein [Camponotus floridanus]	2	C:GO:0005623; P:GO:0045454	C:cell; P:cell redox homeostasis
Cflo_07997--XP_396483.3_APIME	1206	kmr23_comp34410_c0_seq1	3602	1168	0.916	0	0.97	0.83	EFN71576	Tankyrase-1 [Camponotus floridanus]	1	F:GO:0003950	F:NAD+ ADP-ribosyltransferase activity	EC:2.4.2.30	NAD(+) ADP-ribosyltransferase
Cflo_08006--XP_392070.1_APIME	485	kmr23_comp69043_c0_seq1	1557	416	0.962	0	0.86	0.8	EFN71585	Neuronal acetylcholine receptor subunit alpha-7 [Camponotus floridanus]	5	C:GO:0045211; P:GO:0098655; C:GO:0016021; C:GO:0030054; F:GO:0005230	C:postsynaptic membrane; P:cation transmembrane transport; C:integral component of membrane; C:cell junction; F:extracellular ligand-gated ion channel activity
Cflo_08034--NA	373	kmr23_comp78305_c0_seq1	1376	342	0.711	2.77488e-133	0.92	0.74	EFN60320	hypothetical protein EAG_04048 [Camponotus floridanus]
Cflo_08045--NA	227	kmr23_comp67339_c3_seq1	1771	80	0.825	4.27791e-23	0.35	0.14	EFN60331	hypothetical protein EAG_04059 [Camponotus floridanus]
Cflo_08050--XP_394370.1_APIME	248	kmr23_comp79289_c0_seq1	775	248	0.754	1.22809e-114	1	0.96	EFN74332	Chymotrypsin-1 [Camponotus floridanus]	2	P:GO:0006508; F:GO:0004252	P:proteolysis; F:serine-type endopeptidase activity	EC:3.4.21	Acting on peptide bonds (peptidases)
Cflo_08083--XP_395477.3_APIME	765	kmr23_comp66365_c0_seq1	1970	582	0.926	0	0.76	0.89	EFN65596	Probable muscarinic acetylcholine receptor gar-2 [Camponotus floridanus]	3	F:GO:0004930; P:GO:0007186; C:GO:0016021	F:G-protein coupled receptor activity; P:G-protein coupled receptor signaling pathway; C:integral component of membrane
Cflo_08084--XP_623622.1_APIME	685	kmr23_comp78856_c0_seq1	3167	683	0.87	0	1	0.65	EFN65597	Aminopeptidase N [Camponotus floridanus]	4	F:GO:0008270; P:GO:0006508; F:GO:0004177; F:GO:0008237	F:zinc ion binding; P:proteolysis; F:aminopeptidase activity; F:metallopeptidase activity	EC:3.4.11	Acting on peptide bonds (peptidases)
Cflo_08086--XP_001119867.1_APIME	635	kmr23_comp35124_c0_seq1	8340	627	0.815	0	0.99	0.68	EFN65599	Thyrotropin-releasing hormone-degrading ectoenzyme [Camponotus floridanus]	4	F:GO:0008270; P:GO:0006508; F:GO:0004177; F:GO:0008237	F:zinc ion binding; P:proteolysis; F:aminopeptidase activity; F:metallopeptidase activity	EC:3.4.11	Acting on peptide bonds (peptidases)
Cflo_08087--XP_001119867.1_APIME	2384	kmr23_comp35124_c0_seq1	8340	2381	0.8	0	1	0.97	EFN65600	Aminopeptidase N [Camponotus floridanus]	4	F:GO:0008270; P:GO:0006508; F:GO:0004177; F:GO:0008237	F:zinc ion binding; P:proteolysis; F:aminopeptidase activity; F:metallopeptidase activity	EC:3.4.11	Acting on peptide bonds (peptidases)
Cflo_08115--XP_001951425.1_ACYPI	302	kmr27_comp90945_c0_seq7	4792	294	0.983	2.73518e-151	0.97	0.18	EFN71775	hypothetical protein EAG_08546 [Camponotus floridanus]	4	F:GO:0004930; P:GO:0007186; C:GO:0016021; P:GO:0007166	F:G-protein coupled receptor activity; P:G-protein coupled receptor signaling pathway; C:integral component of membrane; P:cell surface receptor signaling pathway
Cflo_08116--XP_001121557.1_APIME	316	kmr23_comp29076_c0_seq1	1062	310	0.887	0	0.98	0.88	EFN71776	Ankyrin repeat domain-containing protein 16 [Camponotus floridanus]
Cflo_08126--XP_394796.3_APIME	617	kmr23_comp67887_c4_seq1	2557	559	0.986	0	0.91	0.66	EFN73951	Neuroligin-1 [Camponotus floridanus]	2	F:GO:0042043; C:GO:0016021	F:neurexin family protein binding; C:integral component of membrane
Cflo_08136--NA	152	kmr23_comp57758_c0_seq1	500	97	0.835	2.66477e-37	0.64	0.58	EFN73961	hypothetical protein EAG_05205 [Camponotus floridanus]
Cflo_08144--XP_001604043.1_NASVI	150	kmr23_comp78326_c0_seq1	560	150	0.88	6.6941e-93	1	0.8	EFN73969	hypothetical protein EAG_05213 [Camponotus floridanus]
Cflo_08161--NA	303	kmr27_comp89416_c5_seq1	1295	46	0.804	7.37504e-08	0.15	0.11	EFN73745	hypothetical protein EAG_03074 [Camponotus floridanus]
Cflo_08183--XP_001599618.1_NASVI	700	kmr23_comp70199_c20_seq1	1930	603	0.761	0	0.86	0.96	XP_001601554	PREDICTED: hypothetical protein LOC100117260 [Nasonia vitripennis]
Cflo_08192--XP_001120338.1_APIME	218	kmr23_comp36810_c0_seq1	1531	213	0.859	6.6863e-135	0.98	0.42	EFN67640	Ovochymase-2 [Camponotus floridanus]	2	P:GO:0006508; F:GO:0004252	P:proteolysis; F:serine-type endopeptidase activity	EC:3.4.21	Acting on peptide bonds (peptidases)
Cflo_08204--NA	267	kmr23_comp130443_c0_seq1	327	31	0.935	2.0158e-11	0.12	0.28	EFN67651	hypothetical protein EAG_11684 [Camponotus floridanus]
Cflo_08216--NA	236	kmr23_comp81090_c0_seq1	932	29	0.793	5.25956e-12	0.12	0.09	EFN74079	hypothetical protein EAG_04465 [Camponotus floridanus]
Cflo_08218--XP_001121838.1_APIME	326	kmr27_comp87315_c3_seq2	1193	184	0.94	2.33088e-117	0.56	0.46	EFN74081	RPE-spondin [Camponotus floridanus]	4	P:GO:0006955; F:GO:0005044; P:GO:0006898; F:GO:0030247	P:immune response; F:scavenger receptor activity; P:receptor-mediated endocytosis; F:polysaccharide binding
Cflo_08232--BGIBMGA006856-PA_BOMMO	2219	kmr29_comp91605_c0_seq1	1178	376	0.816	0	0.17	0.95	EFN74095	Sperm surface protein Sp17 [Camponotus floridanus]
Cflo_08271--XP_624352.1_APIME	523	kmr25_comp75696_c2_seq2	682	225	0.947	9.04691e-156	0.43	0.99	EFN66958	Probable tubulin polyglutamylase TTLL2 [Camponotus floridanus]	1	P:GO:0006464	P:cellular protein modification process
Cflo_08282--XP_396017.2_APIME	624	kmr23_comp78041_c0_seq1	2519	624	0.966	0	1	0.74	EFN66969	Leucine-rich repeat protein SHOC-2 [Camponotus floridanus]
Cflo_08287--XP_001121003.1_APIME	1482	kmr23_comp66623_c1_seq1	5106	1258	0.94	0	0.85	0.74	EFN66973	Tyrosine-protein phosphatase 69D [Camponotus floridanus]	3	F:GO:0004725; C:GO:0016021; P:GO:0035335	F:protein tyrosine phosphatase activity; C:integral component of membrane; P:peptidyl-tyrosine dephosphorylation	EC:3.1.3.16; EC:3.1.3.48; EC:3.1.3.41	Protein-serine/threonine phosphatase; Protein-tyrosine-phosphatase; 4-nitrophenylphosphatase
Cflo_08323--XP_392723.3_APIME	552	kmr27_comp91336_c0_seq33	4828	493	0.945	0	0.89	0.31	EFN74384	Putative glycerol kinase 3 [Camponotus floridanus]	4	P:GO:0005975; P:GO:0006072; F:GO:0004370; P:GO:0016310	P:carbohydrate metabolic process; P:glycerol-3-phosphate metabolic process; F:glycerol kinase activity; P:phosphorylation	EC:2.7.1.30	Glycerol kinase
Cflo_08371--NP_001035320.1_APIME	212	kmr23_comp67201_c1_seq1	1729	212	0.892	1.23499e-127	1	0.37	EFN69187	Acetylcholinesterase [Camponotus floridanus]	1	F:GO:0004104	F:cholinesterase activity	EC:3.1.1.8; EC:3.1.1.1	Cholinesterase; Carboxylesterase
Cflo_08387--XP_393237.2_APIME	480	kmr23_comp81115_c0_seq1	1189	311	0.868	0	0.65	0.79	EFN62850	Alpha-tocopherol transfer protein-like [Camponotus floridanus]	3	P:GO:0006810; C:GO:0005622; F:GO:0005215	P:transport; C:intracellular; F:transporter activity
Cflo_08390--NA	47	kmr29_comp79071_c0_seq3	312	47	0.787	6.69116e-21	1	0.45	EFN64076	hypothetical protein EAG_02335 [Camponotus floridanus]	4	F:GO:0005549; C:GO:0016020; P:GO:0050911; F:GO:0004984	F:odorant binding; C:membrane; P:detection of chemical stimulus involved in sensory perception of smell; F:olfactory receptor activity
Cflo_08421--XP_001122292.1_APIME	1704	kmr25_comp76232_c0_seq1	342	544	0.721	1.99213e-47	0.32	0.99	EFN68518	Peritrophin-1 [Camponotus floridanus]	3	F:GO:0008061; P:GO:0006030; C:GO:0005576	F:chitin binding; P:chitin metabolic process; C:extracellular region
Cflo_08422--XP_001122255.1_APIME	115	kmr27_comp42034_c0_seq1	1056	115	0.722	3.48666e-50	1	0.31	EFN68519	hypothetical protein EAG_09948 [Camponotus floridanus]	2	C:GO:0005576; F:GO:0005179	C:extracellular region; F:hormone activity
Cflo_08442--XP_391863.3_APIME	167	kmr25_comp84344_c0_seq1	2803	167	0.964	2.04639e-108	1	0.18	EFN69049	Tyrosine-protein kinase transmembrane receptor Ror2 [Camponotus floridanus]	4	F:GO:0005524; P:GO:0018108; F:GO:0004713; C:GO:0016021	F:ATP binding; P:peptidyl-tyrosine phosphorylation; F:protein tyrosine kinase activity; C:integral component of membrane	EC:2.7.10	Transferring phosphorus-containing groups
Cflo_08480--XP_001120174.1_APIME	293	kmr23_comp72078_c0_seq1	3116	235	0.809	1.16962e-129	0.8	0.23	EFN65465	hypothetical protein EAG_15272 [Camponotus floridanus]
Cflo_08495--XP_624828.1_APIME	655	kmr23_comp56318_c3_seq1	5602	521	0.929	0	0.8	0.28	EFN65479	Sodium/potassium/calcium exchanger 4 [Camponotus floridanus]	2	P:GO:0055085; C:GO:0016021	P:transmembrane transport; C:integral component of membrane
Cflo_08510--XP_001122033.1_APIME	119	kmr25_comp81078_c0_seq2	730	117	0.974	1.6564e-78	0.98	0.48	EFN72298	hypothetical protein EAG_01991 [Camponotus floridanus]
Cflo_08511--NA	654	kmr23_comp90786_c0_seq1	424	119	0.798	2.31193e-61	0.18	0.84	EFN72299	hypothetical protein EAG_01992 [Camponotus floridanus]
Cflo_08521--NA	307	kmr23_comp41783_c0_seq1	1071	72	0.917	1.93962e-30	0.23	0.31	EFN64890	hypothetical protein EAG_03045 [Camponotus floridanus]
Cflo_08594--XP_001601228.1_NASVI	77	kmr25_comp85312_c0_seq1	1061	74	0.824	2.47682e-39	0.96	0.21	EFN71761	hypothetical protein EAG_15795 [Camponotus floridanus]	3	P:GO:0090502; F:GO:0003676; F:GO:0004523	P:RNA phosphodiester bond hydrolysis, endonucleolytic; F:nucleic acid binding; F:RNA-DNA hybrid ribonuclease activity
Cflo_08603--XP_001121303.1_APIME	188	kmr25_comp81630_c1_seq4	901	188	0.995	9.03985e-136	1	0.63	EFN66152	hypothetical protein EAG_01013 [Camponotus floridanus]
Cflo_08609--XP_001121415.1_APIME	523	kmr27_comp55991_c1_seq1	539	173	0.96	3.83894e-108	0.33	0.97	EFN68083	Homeobox protein B-H1 [Camponotus floridanus]	3	C:GO:0005634; P:GO:0006355; F:GO:0043565	C:nucleus; P:regulation of transcription, DNA-templated; F:sequence-specific DNA binding
Cflo_08639--XP_395172.2_APIME	354	kmr29_comp94907_c0_seq1	5421	342	0.994	0	0.97	0.19	EFN66163	Guanine nucleotide-binding protein G(o) subunit alpha [Camponotus floridanus]	5	F:GO:0005525; F:GO:0003924; P:GO:0007188; F:GO:0031683; F:GO:0004871	F:GTP binding; F:GTPase activity; P:adenylate cyclase-modulating G-protein coupled receptor signaling pathway; F:G-protein beta/gamma-subunit complex binding; F:signal transducer activity	EC:3.6.1.15	Nucleoside-triphosphate phosphatase
Cflo_08701--NA	61	kmr29_comp89991_c0_seq1	241	27	0.704	4.81025e-07	0.44	0.35	EFN65073	hypothetical protein EAG_12960 [Camponotus floridanus]
Cflo_08745--NA	156	kmr23_comp104443_c0_seq1	971	138	0.899	5.7733e-25	0.88	0.43	EFN65024	hypothetical protein EAG_02541 [Camponotus floridanus]
Cflo_08747--XP_391967.3_APIME	274	kmr23_comp68338_c0_seq1	867	263	0.913	1.73086e-178	0.96	0.91	EFN65026	RING finger protein nhl-1 [Camponotus floridanus]	1	F:GO:0008270	F:zinc ion binding
Cflo_08753--XP_392185.3_APIME	389	kmr23_comp51219_c0_seq1	2751	380	0.842	0	0.98	0.41	EFN71373	Glutamate receptor, ionotropic kainate 2 [Camponotus floridanus]	7	C:GO:0045211; P:GO:0034220; C:GO:0016021; C:GO:0030054; P:GO:0035235; F:GO:0004970; F:GO:0005234	C:postsynaptic membrane; P:ion transmembrane transport; C:integral component of membrane; C:cell junction; P:ionotropic glutamate receptor signaling pathway; F:ionotropic glutamate receptor activity; F:extracellular-glutamate-gated ion channel activity
Cflo_08824--XP_395449.2_APIME	475	kmr23_comp75459_c0_seq1	1616	475	0.735	0	1	0.88	EFN66892	Fatty acyl-CoA reductase 1 [Camponotus floridanus]	3	C:GO:0016020; P:GO:0055114; F:GO:0080019	C:membrane; P:oxidation-reduction process; F:fatty-acyl-CoA reductase (alcohol-forming) activity
Cflo_08829--XP_394277.2_APIME	295	kmr25_comp80291_c0_seq2	1171	294	0.922	0	1	0.76	EFN66897	Cathepsin K [Camponotus floridanus]	2	P:GO:0006508; F:GO:0008234	P:proteolysis; F:cysteine-type peptidase activity
Cflo_08840--XP_001119981.1_APIME	503	kmr27_comp81371_c0_seq1	1766	484	0.808	0	0.96	0.82	EFN68174	Probable cytochrome P450 6a13 [Camponotus floridanus]	6	F:GO:0005506; F:GO:0016705; C:GO:0016021; P:GO:0055114; F:GO:0004497; F:GO:0020037	F:iron ion binding; F:oxidoreductase activity, acting on paired donors, with incorporation or reduction of molecular oxygen; C:integral component of membrane; P:oxidation-reduction process; F:monooxygenase activity; F:heme binding
Cflo_08841--XP_001119981.1_APIME	502	kmr29_comp94490_c0_seq4	1677	502	0.755	0	1	0.89	EFN68175	Cytochrome P450 6j1 [Camponotus floridanus]	6	F:GO:0005506; F:GO:0016705; C:GO:0016021; P:GO:0055114; F:GO:0004497; F:GO:0020037	F:iron ion binding; F:oxidoreductase activity, acting on paired donors, with incorporation or reduction of molecular oxygen; C:integral component of membrane; P:oxidation-reduction process; F:monooxygenase activity; F:heme binding
Cflo_08851--XP_001119870.1_APIME	125	kmr25_comp85299_c8_seq5	2082	120	0.95	6.77484e-65	0.96	0.17	EFN62296	Neuroligin-1 [Camponotus floridanus]	1	C:GO:0016021	C:integral component of membrane
Cflo_08873--XP_001121303.1_APIME	146	kmr27_comp85976_c2_seq4	1135	91	0.945	3.44554e-53	0.62	0.24	EFN65982	hypothetical protein EAG_03115 [Camponotus floridanus]
Cflo_08882--XP_395723.2_APIME	839	kmr27_comp84143_c1_seq6	3623	805	0.943	0	0.96	0.67	EFN65990	GTP-binding protein RAD [Camponotus floridanus]	4	F:GO:0005525; P:GO:0007264; C:GO:0016020; C:GO:0005622	F:GTP binding; P:small GTPase mediated signal transduction; C:membrane; C:intracellular
Cflo_08901--XP_001121707.1_APIME	1335	kmr25_comp84324_c0_seq1	5505	1334	0.749	0	1	0.89	EFN61730	Putative vitellogenin receptor [Camponotus floridanus]	2	F:GO:0005509; C:GO:0016021	F:calcium ion binding; C:integral component of membrane
Cflo_08924--NA	323	kmr27_comp84463_c0_seq2	202	44	0.841	1.62572e-11	0.14	0.72	EFN74677	hypothetical protein EAG_10204 [Camponotus floridanus]
Cflo_08965--FBpp0100042_DROME	40	kmr23_comp68081_c1_seq1	2281	40	0.975	9.56663e-20	1	0.05	EFN74496	hypothetical protein EAG_05888 [Camponotus floridanus]
Cflo_08966--XP_001606415.1_NASVI	89	kmr23_comp68081_c8_seq1	992	84	0.917	1.5913e-48	0.94	0.26	EFN74497	hypothetical protein EAG_05889 [Camponotus floridanus]
Cflo_08979--XP_392186.2_APIME	680	kmr23_comp68470_c3_seq1	1232	247	0.923	1.3963e-127	0.36	0.59	EFN65177	Monocarboxylate transporter 14 [Camponotus floridanus]	2	P:GO:0055085; C:GO:0016021	P:transmembrane transport; C:integral component of membrane
Cflo_09059--XP_394640.2_APIME	134	kmr27_comp87572_c0_seq1	3131	118	0.958	2.30433e-77	0.88	0.11	EFN66861	Protein krueppel [Camponotus floridanus]	2	F:GO:0003676; F:GO:0046872	F:nucleic acid binding; F:metal ion binding
Cflo_09064--XP_623678.1_APIME	283	kmr27_comp91288_c0_seq2	1383	283	0.707	1.52351e-120	1	0.63	EFN66866	hypothetical protein EAG_04770 [Camponotus floridanus]	1	C:GO:0016021	C:integral component of membrane
Cflo_09110--XP_001120755.1_APIME	118	kmr25_comp84264_c2_seq4	2050	118	0.907	2.7044e-70	1	0.17	EFN63035	Rhombotin-1 [Camponotus floridanus]	1	F:GO:0008270	F:zinc ion binding
Cflo_09111--XP_394342.1_APIME	77	kmr27_comp88435_c1_seq2	2362	77	0.987	2.34833e-45	1	0.1	EFN63036	hypothetical protein EAG_05740 [Camponotus floridanus]
Cflo_09113--BGIBMGA007578-PA_BOMMO	65	kmr25_comp70187_c1_seq1	211	51	0.843	3.9797e-26	0.78	0.73	EFN61186	hypothetical protein EAG_12745 [Camponotus floridanus]
Cflo_09116--XP_396378.3_APIME	649	kmr23_comp61522_c0_seq1	810	197	0.949	2.44391e-108	0.3	0.74	EFN63561	hypothetical protein EAG_00642 [Camponotus floridanus]	1	C:GO:0016021	C:integral component of membrane
Cflo_09134--XP_394770.3_APIME	522	kmr23_comp83926_c0_seq1	2581	501	0.952	0	0.96	0.58	EFN69802	Silk gland factor 1 [Camponotus floridanus]	5	F:GO:0003700; F:GO:0019904; P:GO:0006355; F:GO:0043565; F:GO:0008134	F:transcription factor activity, sequence-specific DNA binding; F:protein domain specific binding; P:regulation of transcription, DNA-templated; F:sequence-specific DNA binding; F:transcription factor binding
Cflo_09181--XP_394472.3_APIME	686	kmr29_comp92904_c2_seq1	1908	530	0.951	0	0.77	0.83	EFN71065	Organic cation transporter 1 [Camponotus floridanus]	3	P:GO:0055085; F:GO:0022857; C:GO:0016021	P:transmembrane transport; F:transmembrane transporter activity; C:integral component of membrane
Cflo_09197--XP_394955.2_APIME	746	kmr23_comp68272_c0_seq1	995	460	0.722	0	0.62	0.81	EFN71452	Ribosomal protein S6 kinase alpha-3 [Camponotus floridanus]	6	F:GO:0000287; F:GO:0005524; F:GO:0004674; P:GO:0006468; C:GO:0005622; P:GO:0035556	F:magnesium ion binding; F:ATP binding; F:protein serine/threonine kinase activity; P:protein phosphorylation; C:intracellular; P:intracellular signal transduction	EC:2.7.11	Transferring phosphorus-containing groups
Cflo_09206--XP_001121628.1_APIME	1515	kmr23_comp69088_c0_seq1	4660	1436	0.914	0	0.95	0.93	EFN71461	Insulin-like receptor [Camponotus floridanus]	5	F:GO:0005524; P:GO:0018108; F:GO:0004714; C:GO:0016021; P:GO:0007169	F:ATP binding; P:peptidyl-tyrosine phosphorylation; F:transmembrane receptor protein tyrosine kinase activity; C:integral component of membrane; P:transmembrane receptor protein tyrosine kinase signaling pathway	EC:2.7.10; EC:2.7.10.1; EC:2.7.11	Transferring phosphorus-containing groups; Receptor protein-tyrosine kinase; Transferring phosphorus-containing groups
Cflo_09214--XP_001121216.1_APIME	195	kmr23_comp16668_c0_seq1	268	32	1	1.88668e-13	0.16	0.36	EFN64942	hypothetical protein EAG_09755 [Camponotus floridanus]
Cflo_09218--NA	408	kmr23_comp64847_c1_seq1	494	49	0.959	2.64411e-32	0.12	0.3	EFN64946	hypothetical protein EAG_09759 [Camponotus floridanus]
Cflo_09226--NA	410	kmr25_comp83969_c1_seq3	528	52	0.75	5.41457e-17	0.13	0.3	EFN62217	hypothetical protein EAG_10619 [Camponotus floridanus]
Cflo_09235--XP_625140.1_APIME	175	kmr23_comp62794_c1_seq1	265	88	0.977	1.14855e-45	0.5	1	EFN65953	Probable G-protein coupled receptor B0563.6 [Camponotus floridanus]	3	F:GO:0004930; P:GO:0007186; C:GO:0016021	F:G-protein coupled receptor activity; P:G-protein coupled receptor signaling pathway; C:integral component of membrane
Cflo_09252--XP_393969.1_APIME	297	kmr23_comp73240_c0_seq1	2057	288	0.823	1.30407e-169	0.97	0.42	EFN63661	Cytochrome P450 9e2 [Camponotus floridanus]	5	F:GO:0016712; F:GO:0005506; C:GO:0016021; P:GO:0055114; F:GO:0020037	F:oxidoreductase activity, acting on paired donors, with incorporation or reduction of molecular oxygen, reduced flavin or flavoprotein as one donor, and incorporation of one atom of oxygen; F:iron ion binding; C:integral component of membrane; P:oxidation-reduction process; F:heme binding	EC:1.14.14	Acting on paired donors, with incorporation or reduction of molecular oxygen. The oxygen incorporated need not be derived from O(2)
Cflo_09260--XP_393969.1_APIME	494	kmr31_comp11149_c0_seq1	2100	494	0.765	0	1	0.72	EFN61086	Cytochrome P450 9e2 [Camponotus floridanus]	6	F:GO:0005506; F:GO:0016705; C:GO:0016021; P:GO:0055114; F:GO:0004497; F:GO:0020037	F:iron ion binding; F:oxidoreductase activity, acting on paired donors, with incorporation or reduction of molecular oxygen; C:integral component of membrane; P:oxidation-reduction process; F:monooxygenase activity; F:heme binding
Cflo_09261--XP_393969.1_APIME	496	kmr31_comp11149_c0_seq1	2100	496	0.752	0	1	0.72	EFN61086	Cytochrome P450 9e2 [Camponotus floridanus]	6	F:GO:0005506; F:GO:0016705; C:GO:0016021; P:GO:0055114; F:GO:0004497; F:GO:0020037	F:iron ion binding; F:oxidoreductase activity, acting on paired donors, with incorporation or reduction of molecular oxygen; C:integral component of membrane; P:oxidation-reduction process; F:monooxygenase activity; F:heme binding
Cflo_09326--XP_396935.3_APIME	276	kmr29_comp93135_c2_seq6	1107	268	0.754	7.38594e-140	0.97	0.73	EFN71286	Nucleoside diphosphate-linked moiety X motif 19, mitochondrial [Camponotus floridanus]	1	F:GO:0016787	F:hydrolase activity
Cflo_09332--XP_001122188.1_APIME	1832	kmr25_comp85058_c0_seq1	6460	1832	0.944	0	1	0.84	EFN71292	Myosin-Va [Camponotus floridanus]	4	F:GO:0051015; C:GO:0016459; F:GO:0005524; F:GO:0003774	F:actin filament binding; C:myosin complex; F:ATP binding; F:motor activity	EC:3.6.1.15	Nucleoside-triphosphate phosphatase
Cflo_09348--XP_001121751.1_APIME	480	kmr23_comp58090_c2_seq1	394	113	1	3.78336e-79	0.24	0.86	EFN61790	Insulinoma-associated protein 2 [Camponotus floridanus]	2	F:GO:0003676; F:GO:0046872	F:nucleic acid binding; F:metal ion binding
Cflo_09352--XP_393487.3_APIME	404	kmr27_comp89832_c1_seq29	2422	404	0.785	0	1	0.5	EFN61794	Lipase 3 [Camponotus floridanus]	2	F:GO:0016788; P:GO:0016042	F:hydrolase activity, acting on ester bonds; P:lipid catabolic process
Cflo_09380--XP_001120883.1_APIME	240	kmr23_comp13465_c0_seq1	227	51	0.961	3.04888e-27	0.21	0.68	EFN65933	ALX homeobox protein 1 [Camponotus floridanus]	3	C:GO:0005634; P:GO:0006355; F:GO:0043565	C:nucleus; P:regulation of transcription, DNA-templated; F:sequence-specific DNA binding
Cflo_09440--XP_624136.2_APIME	289	kmr23_comp35073_c0_seq1	2680	289	0.91	2.19458e-177	1	0.33	XP_003706930	PREDICTED: zinc finger protein ZIC 4-like [Megachile rotundata]
Cflo_09465--NA	86	kmr23_comp45716_c0_seq1	322	47	0.915	1.09163e-24	0.55	0.44	EFN70578	hypothetical protein EAG_00652 [Camponotus floridanus]
Cflo_09477--XP_393339.2_APIME	682	kmr29_comp96853_c2_seq4	8052	665	0.764	0	0.98	0.25	EFN63093	Fasciclin-2 [Camponotus floridanus]	2	C:GO:0016020; P:GO:0007155	C:membrane; P:cell adhesion
Cflo_09478--NA	529	kmr23_comp112186_c0_seq1	464	51	0.784	3.91687e-17	0.1	0.38	EFN63094	hypothetical protein EAG_10076 [Camponotus floridanus]
Cflo_09529--XP_397146.3_APIME	481	kmr27_comp87803_c0_seq4	1809	480	0.713	0	1	0.8	EFN71329	Acidic mammalian chitinase [Camponotus floridanus]	5	F:GO:0004568; P:GO:0005975; F:GO:0008061; P:GO:0006032; C:GO:0005576	F:chitinase activity; P:carbohydrate metabolic process; F:chitin binding; P:chitin catabolic process; C:extracellular region	EC:3.2.1.14	Chitinase
Cflo_09580--XP_001120453.1_APIME	184	kmr27_comp79196_c0_seq1	1147	170	0.847	5.50396e-98	0.92	0.44	EFN73451	hypothetical protein EAG_11727 [Camponotus floridanus]	2	P:GO:0007218; C:GO:0005576	P:neuropeptide signaling pathway; C:extracellular region
Cflo_09583--XP_393943.3_APIME	400	kmr29_comp88146_c0_seq1	1501	400	0.84	0	1	0.8	EFN74107	ATPase WRNIP1 [Camponotus floridanus]	3	F:GO:0003677; F:GO:0005524; P:GO:0006260	F:DNA binding; F:ATP binding; P:DNA replication
Cflo_09618--XP_001122188.1_APIME	1811	kmr25_comp85058_c0_seq1	6460	1811	0.887	0	1	0.85	EFN65790	Myosin-Va [Camponotus floridanus]	4	F:GO:0051015; C:GO:0016459; F:GO:0005524; F:GO:0003774	F:actin filament binding; C:myosin complex; F:ATP binding; F:motor activity	EC:3.6.1.15	Nucleoside-triphosphate phosphatase
Cflo_09706--NA	193	kmr25_comp80431_c0_seq3	414	65	0.723	8.34357e-18	0.34	0.44	EFN70882	hypothetical protein EAG_05631 [Camponotus floridanus]
Cflo_09718--XP_623928.2_APIME	2140	kmr23_comp73248_c0_seq1	6779	2130	0.988	0	1	0.94	EFN70894	Putative U5 small nuclear ribonucleoprotein 200 kDa helicase [Camponotus floridanus]	5	F:GO:0003676; F:GO:0005524; C:GO:0030529; C:GO:0019013; F:GO:0004386	F:nucleic acid binding; F:ATP binding; C:intracellular ribonucleoprotein complex; C:viral nucleocapsid; F:helicase activity	EC:3.6.1.15	Nucleoside-triphosphate phosphatase
Cflo_09745--XP_395884.2_APIME	748	kmr25_comp86027_c5_seq1	4329	748	0.85	0	1	0.52	EFN65569	Protein piwi [Camponotus floridanus]	1	F:GO:0003676	F:nucleic acid binding
Cflo_09756--XP_001120770.1_APIME	299	kmr23_comp55627_c0_seq1	1822	292	0.945	0	0.98	0.48	EFN73418	Elongation of very long chain fatty acids protein 7 [Camponotus floridanus]	3	C:GO:0016021; F:GO:0016740; P:GO:0006633	C:integral component of membrane; F:transferase activity; P:fatty acid biosynthetic process
Cflo_09766--XP_624127.2_APIME	133	kmr25_comp81902_c0_seq6	3137	58	0.897	3.66959e-28	0.44	0.06	EFN74259	Kin of IRRE-like protein 1 [Camponotus floridanus]
Cflo_09821--XP_001122827.1_APIME	1208	kmr23_comp34672_c1_seq1	1960	653	0.848	0	0.54	1	EFN61014	Putative ATP-dependent RNA helicase TDRD9 [Camponotus floridanus]	3	F:GO:0003676; F:GO:0005524; F:GO:0004386	F:nucleic acid binding; F:ATP binding; F:helicase activity	EC:3.6.1.15	Nucleoside-triphosphate phosphatase
Cflo_09827--XP_392366.2_APIME	634	kmr29_comp96463_c6_seq1	3246	634	0.964	0	1	0.59	EFN61020	Neuroendocrine convertase 2 [Camponotus floridanus]	2	P:GO:0006508; F:GO:0004252	P:proteolysis; F:serine-type endopeptidase activity	EC:3.4.21	Acting on peptide bonds (peptidases)
Cflo_09828--XP_001120289.1_APIME	768	kmr23_comp62142_c0_seq1	2183	699	0.891	0	0.91	0.96	EFN61021	Endothelin-converting enzyme 1 [Camponotus floridanus]	3	P:GO:0006508; C:GO:0016021; F:GO:0004222	P:proteolysis; C:integral component of membrane; F:metalloendopeptidase activity	EC:3.4.24	Acting on peptide bonds (peptidases)
Cflo_09890--XP_391914.1_APIME	306	kmr27_comp88812_c0_seq2	1135	270	0.978	6.17766e-174	0.88	0.71	EFN60565	hypothetical protein EAG_13040 [Camponotus floridanus]	1	C:GO:0016021	C:integral component of membrane
Cflo_09894--XP_623788.1_APIME	322	kmr25_comp78070_c0_seq1	1501	315	0.702	2.00104e-166	0.98	0.63	EFN60569	Alpha-tocopherol transfer protein-like [Camponotus floridanus]	3	P:GO:0006810; C:GO:0005622; F:GO:0005215	P:transport; C:intracellular; F:transporter activity
Cflo_09902--XP_394338.2_APIME	462	kmr29_comp93140_c0_seq3	1872	439	0.911	0	0.95	0.7	EFN65254	Solute carrier family 41 member 1 [Camponotus floridanus]	3	P:GO:0098655; C:GO:0016021; F:GO:0008324	P:cation transmembrane transport; C:integral component of membrane; F:cation transmembrane transporter activity
Cflo_09922--XP_395234.3_APIME	165	kmr29_comp95137_c0_seq9	2852	165	0.709	3.36821e-70	1	0.21	EFN64712	Transient receptor potential channel pyrexia [Camponotus floridanus]	3	F:GO:0005216; P:GO:0034220; C:GO:0016021	F:ion channel activity; P:ion transmembrane transport; C:integral component of membrane
Cflo_09937--XP_623361.2_APIME	140	kmr27_comp90676_c2_seq1	5634	140	1	4.55207e-91	1	0.07	EFN64726	Atrial natriuretic peptide receptor B [Camponotus floridanus]	6	F:GO:0000166; P:GO:0006182; C:GO:0016021; F:GO:0004383; C:GO:0005622; P:GO:0035556	F:nucleotide binding; P:cGMP biosynthetic process; C:integral component of membrane; F:guanylate cyclase activity; C:intracellular; P:intracellular signal transduction	EC:4.6.1.2	Guanylate cyclase
Cflo_09940--NA	403	kmr23_comp61334_c0_seq1	502	72	0.931	5.14911e-37	0.18	0.43	EFN63202	hypothetical protein EAG_00629 [Camponotus floridanus]
Cflo_10035--XP_001120154.1_APIME	204	kmr27_comp85096_c1_seq3	1547	175	0.977	2.74212e-99	0.86	0.34	EFN63267	Beta-1-syntrophin [Camponotus floridanus]	3	P:GO:0050808; C:GO:0016010; F:GO:0005198	P:synapse organization; C:dystrophin-associated glycoprotein complex; F:structural molecule activity
Cflo_10040--XP_394796.3_APIME	654	kmr23_comp68047_c4_seq1	1497	44	0.909	5.36715e-19	0.07	0.09	EFN63271	hypothetical protein EAG_03105 [Camponotus floridanus]	1	C:GO:0016021	C:integral component of membrane
Cflo_10046--XP_001120340.1_APIME	53	kmr25_comp77141_c2_seq2	551	53	1	6.06595e-33	1	0.29	XP_001659824	lola [Aedes aegypti] >gi|108874717|gb|EAT38942.1| AAEL009212-PC [Aedes aegypti]	1	F:GO:0046872	F:metal ion binding
Cflo_10051--NA	93	kmr29_comp57507_c0_seq2	209	58	0.879	5.46947e-33	0.62	0.84	EFN68030	hypothetical protein EAG_06742 [Camponotus floridanus]	1	F:GO:0046872	F:metal ion binding
Cflo_10054--XP_001120230.1_APIME	194	kmr23_comp83570_c0_seq1	990	43	0.86	2.06868e-17	0.22	0.13	EFN68033	Longitudinals lacking protein, isoforms A/B/D/L [Camponotus floridanus]	1	F:GO:0046872	F:metal ion binding
Cflo_10063--XP_001120880.1_APIME	102	kmr25_comp41622_c0_seq1	717	102	0.941	1.05666e-66	1	0.43	EFN68042	Longitudinals lacking protein, isoforms A/B/D/L [Camponotus floridanus]	1	F:GO:0046872	F:metal ion binding
Cflo_10067--XP_001120929.1_APIME	121	kmr29_comp57856_c0_seq2	447	80	0.8	1.40299e-43	0.66	0.54	EFN68046	Longitudinals lacking protein, isoforms A/B/D/L [Camponotus floridanus]	1	F:GO:0046872	F:metal ion binding
Cflo_10077--XP_001122500.1_APIME	1136	kmr29_comp92365_c2_seq1	2417	793	0.955	0	0.7	0.98	EFN73387	Pre-mRNA-splicing factor ATP-dependent RNA helicase PRP16 [Camponotus floridanus]	3	F:GO:0003676; F:GO:0005524; F:GO:0008026	F:nucleic acid binding; F:ATP binding; F:ATP-dependent helicase activity	EC:3.6.1.3; EC:3.6.1.15	Adenosinetriphosphatase; Nucleoside-triphosphate phosphatase
Cflo_10124--XP_392668.2_APIME	693	kmr25_comp85382_c3_seq1	4565	693	0.949	0	1	0.46	EFN62476	Orphan sodium- and chloride-dependent neurotransmitter transporter NTT4 [Camponotus floridanus]	4	P:GO:0006836; F:GO:0005328; P:GO:0055085; C:GO:0016021	P:neurotransmitter transport; F:neurotransmitter:sodium symporter activity; P:transmembrane transport; C:integral component of membrane
Cflo_10127--XP_393986.1_APIME	644	kmr31_comp2709_c0_seq20	7762	644	0.856	0	1	0.25	EFN65713	Sodium-independent sulfate anion transporter [Camponotus floridanus]	3	F:GO:0008271; C:GO:0016021; P:GO:1902358	F:secondary active sulfate transmembrane transporter activity; C:integral component of membrane; P:sulfate transmembrane transport
Cflo_10159--NA	64	kmr25_comp83327_c5_seq7	539	64	0.719	1.20384e-22	1	0.37	EFN66880	hypothetical protein EAG_06179 [Camponotus floridanus]	3	F:GO:0033925; P:GO:0005975; C:GO:0005737	F:mannosyl-glycoprotein endo-beta-N-acetylglucosaminidase activity; P:carbohydrate metabolic process; C:cytoplasm
Cflo_10160--NA	92	kmr23_comp28874_c0_seq1	1066	71	0.845	7.46138e-32	0.77	0.2	EFN80244	Transposable element Tcb1 transposase [Harpegnathos saltator]
Cflo_10199--XP_395788.3_APIME	1434	kmr27_comp91659_c3_seq1	7341	1428	0.987	0	1	0.58	EFN60543	Ankyrin-2 [Camponotus floridanus]
Cflo_10202--XP_393091.2_APIME	619	kmr27_comp89680_c1_seq4	2017	618	0.874	0	1	0.89	EFN60546	Solute carrier family 35 member F3 [Camponotus floridanus]	1	C:GO:0016021	C:integral component of membrane
Cflo_10208--XP_624095.1_APIME	264	kmr29_comp95755_c0_seq3	1154	202	0.713	1.08504e-80	0.77	0.53	EFN60552	Alpha-tocopherol transfer protein [Camponotus floridanus]	3	P:GO:0006810; C:GO:0005622; F:GO:0005215	P:transport; C:intracellular; F:transporter activity
Cflo_10209--XP_624151.1_APIME	289	kmr23_comp54361_c0_seq1	1111	288	0.715	7.03154e-137	1	0.78	EFN60553	Alpha-tocopherol transfer protein [Camponotus floridanus]	3	P:GO:0006810; C:GO:0005622; F:GO:0005215	P:transport; C:intracellular; F:transporter activity
Cflo_10221--XP_623858.2_APIME	1120	kmr25_comp84510_c2_seq1	3974	1120	0.908	0	1	0.85	EFN74401	Adenylate cyclase type 2 [Camponotus floridanus]	6	F:GO:0000166; F:GO:0016849; C:GO:0016021; C:GO:0005622; P:GO:0009190; P:GO:0035556	F:nucleotide binding; F:phosphorus-oxygen lyase activity; C:integral component of membrane; C:intracellular; P:cyclic nucleotide biosynthetic process; P:intracellular signal transduction
Cflo_10251--XP_001120274.1_APIME	338	kmr27_comp75846_c0_seq1	1771	338	0.923	0	1	0.57	EFN64369	Testicular acid phosphatase-like protein [Camponotus floridanus]	2	P:GO:0016311; F:GO:0003993	P:dephosphorylation; F:acid phosphatase activity	EC:3.1.3.41; EC:3.1.3.2	4-nitrophenylphosphatase; Acid phosphatase
Cflo_10265--XP_396829.1_APIME	206	kmr25_comp65885_c0_seq1	1717	138	0.935	6.80957e-71	0.67	0.24	EFN66355	Immunoglobulin superfamily containing leucine-rich repeat protein [Camponotus floridanus]	1	C:GO:0016021	C:integral component of membrane
Cflo_10303--XP_001119979.1_APIME	529	kmr25_comp75373_c1_seq1	2641	529	0.955	0	1	0.6	EFN68507	Homeotic protein deformed [Camponotus floridanus]	5	C:GO:0005634; F:GO:0003700; P:GO:0007275; P:GO:0006355; F:GO:0043565	C:nucleus; F:transcription factor activity, sequence-specific DNA binding; P:multicellular organism development; P:regulation of transcription, DNA-templated; F:sequence-specific DNA binding
Cflo_10388--XP_393799.3_APIME	1996	kmr23_comp87872_c0_seq1	2792	847	0.945	0	0.42	0.98	EFN61375	Otoferlin [Camponotus floridanus]	1	C:GO:0016021	C:integral component of membrane
Cflo_10432--XP_393448.1_APIME	445	kmr23_comp68145_c2_seq1	1811	445	0.971	0	1	0.74	EFN61539	Synaptotagmin-11 [Camponotus floridanus]	1	C:GO:0016021	C:integral component of membrane
Cflo_10592--NA	172	kmr25_comp85579_c16_seq1	243	69	0.812	8.80916e-12	0.4	0.81	EFN68017	hypothetical protein EAG_05571 [Camponotus floridanus]
Cflo_10593--XP_001604596.1_NASVI	114	kmr27_comp91264_c4_seq11	4164	108	0.991	5.18509e-68	0.95	0.08	EFN68018	Rab-3-interacting molecule unc-10 [Camponotus floridanus]	4	F:GO:0046872; P:GO:0006886; F:GO:0017137; C:GO:0005622	F:metal ion binding; P:intracellular protein transport; F:Rab GTPase binding; C:intracellular
Cflo_10600--XP_623653.2_APIME	11066	kmr31_comp2860_c3_seq1	18459	6680	0.848	0	0.6	0.91	EFN64029	Titin [Camponotus floridanus]
Cflo_10601--XP_623577.2_APIME	4539	kmr27_comp91548_c1_seq1	13338	4408	0.866	0	0.97	0.92	EFN64030	Titin [Camponotus floridanus]
Cflo_10606--XP_001119852.1_APIME	321	kmr23_comp57655_c0_seq1	419	106	0.972	2.05779e-37	0.33	0.76	EFN70590	hypothetical protein EAG_03181 [Camponotus floridanus]	2	C:GO:0005634; F:GO:0003677	C:nucleus; F:DNA binding
Cflo_10607--XP_001119852.1_APIME	50	kmr25_comp16252_c0_seq1	337	50	1	5.4999e-29	1	0.45	XP_003694570	PREDICTED: uncharacterized protein LOC100865467 [Apis florea]	3	C:GO:0005634; P:GO:0006355; F:GO:0043565	C:nucleus; P:regulation of transcription, DNA-templated; F:sequence-specific DNA binding
Cflo_10629--XP_392224.3_APIME	1672	kmr25_comp84711_c2_seq3	3230	1337	0.825	0	0.8	1	EGI65995	Down syndrome cell adhesion molecule-like protein [Acromyrmex echinatior]	1	C:GO:0016021	C:integral component of membrane
Cflo_10630--XP_623972.2_APIME	1695	kmr25_comp84711_c2_seq1	3507	1619	0.759	0	0.96	1	EFN70076	Down syndrome cell adhesion molecule [Camponotus floridanus]	1	C:GO:0016021	C:integral component of membrane
Cflo_10652--XP_393962.2_APIME	165	kmr23_comp66794_c0_seq1	740	165	0.927	3.02492e-115	1	0.67	EFN71521	B9 domain-containing protein 1 [Camponotus floridanus]
Cflo_10687--XP_001122806.1_APIME	512	kmr25_comp82436_c0_seq1	2745	414	0.882	3.08458e-130	0.81	0.43	EFN65159	POU domain, class 2, transcription factor 1 [Camponotus floridanus]	5	C:GO:0005634; F:GO:0003700; P:GO:0006351; P:GO:0006355; F:GO:0043565	C:nucleus; F:transcription factor activity, sequence-specific DNA binding; P:transcription, DNA-templated; P:regulation of transcription, DNA-templated; F:sequence-specific DNA binding
Cflo_10704--NA	494	kmr27_comp84875_c0_seq1	1726	477	0.843	0	0.97	0.83	EFN74504	hypothetical protein EAG_03554 [Camponotus floridanus]	1	C:GO:0016021	C:integral component of membrane
Cflo_10723--XP_001120019.1_APIME	400	kmr27_comp83682_c0_seq2	910	235	0.962	4.48538e-88	0.59	0.78	EGI64570	hypothetical protein G5I_06759 [Acromyrmex echinatior]	1	C:GO:0016021	C:integral component of membrane
Cflo_10728--XP_001120278.1_APIME	289	kmr25_comp73813_c5_seq1	325	100	0.96	7.80573e-51	0.35	0.94	EFN72417	hypothetical protein EAG_06378 [Camponotus floridanus]
Cflo_10730--XP_394125.3_APIME	654	kmr23_comp61699_c1_seq1	235	73	1	4.99914e-40	0.11	0.94	EFN72419	Homeotic protein proboscipedia [Camponotus floridanus]	3	C:GO:0005634; P:GO:0006355; F:GO:0043565	C:nucleus; P:regulation of transcription, DNA-templated; F:sequence-specific DNA binding
Cflo_10743--XP_394435.2_APIME	749	kmr23_comp67279_c1_seq1	2102	588	0.903	0	0.79	0.84	EFN60443	Kinesin-like protein KIF12 [Camponotus floridanus]	5	F:GO:0005524; F:GO:0003777; P:GO:0007018; C:GO:0005874; F:GO:0008017	F:ATP binding; F:microtubule motor activity; P:microtubule-based movement; C:microtubule; F:microtubule binding	EC:3.6.1.15	Nucleoside-triphosphate phosphatase
Cflo_10777--NA	331	kmr23_comp79592_c0_seq1	2064	330	0.752	1.97145e-159	1	0.47	EFN64747	hypothetical protein EAG_05161 [Camponotus floridanus]
Cflo_10820--XP_001119870.1_APIME	102	kmr25_comp85299_c8_seq5	2082	102	0.951	2.80184e-62	1	0.15	EFN65113	Neuroligin-1 [Camponotus floridanus]
Cflo_10851--XP_001120154.1_APIME	944	kmr23_comp63316_c1_seq1	416	55	0.909	1.49344e-41	0.06	0.4	EFN71732	hypothetical protein EAG_11591 [Camponotus floridanus]	3	P:GO:0050808; C:GO:0016010; F:GO:0005198	P:synapse organization; C:dystrophin-associated glycoprotein complex; F:structural molecule activity
Cflo_10939--XP_393750.3_APIME	1174	kmr29_comp96223_c0_seq1	4807	1172	0.878	0	1	0.84	EFN69813	Probable multidrug resistance-associated protein lethal(2)03659 [Camponotus floridanus]	4	F:GO:0005524; F:GO:0042626; P:GO:0055085; C:GO:0016021	F:ATP binding; F:ATPase activity, coupled to transmembrane movement of substances; P:transmembrane transport; C:integral component of membrane	EC:3.6.1.3; EC:3.6.1.15	Adenosinetriphosphatase; Nucleoside-triphosphate phosphatase
Cflo_10970--XP_394109.2_APIME	695	kmr25_comp84584_c2_seq1	5529	561	0.977	0	0.81	0.3	EFN66691	G protein-coupled receptor kinase 2 [Camponotus floridanus]	4	F:GO:0005524; F:GO:0004703; P:GO:0007165; P:GO:0006468	F:ATP binding; F:G-protein coupled receptor kinase activity; P:signal transduction; P:protein phosphorylation	EC:2.7.11; EC:2.7.11.16	Transferring phosphorus-containing groups; [G-protein-coupled receptor] kinase
Cflo_10971--XP_395239.3_APIME	494	kmr27_comp78163_c1_seq1	1155	360	0.961	0	0.73	0.94	EFN66692	Y+L amino acid transporter 2 [Camponotus floridanus]	3	C:GO:0016021; F:GO:0015171; P:GO:0003333	C:integral component of membrane; F:amino acid transmembrane transporter activity; P:amino acid transmembrane transport
Cflo_11006--NA	47	kmr29_comp97058_c0_seq8	2036	46	0.717	2.37104e-13	0.98	0.07	EFN65429	hypothetical protein EAG_15501 [Camponotus floridanus]
Cflo_11022--XP_001122214.1_APIME	682	kmr23_comp69071_c7_seq1	4204	682	0.865	0	1	0.55	EFN60919	Ubiquitin carboxyl-terminal hydrolase 20 [Camponotus floridanus]	3	F:GO:0004843; P:GO:0016579; F:GO:0008270	F:thiol-dependent ubiquitin-specific protease activity; P:protein deubiquitination; F:zinc ion binding	EC:3.4.19.12	Ubiquitinyl hydrolase 1
Cflo_11029--XP_001120115.1_APIME	122	kmr25_comp74042_c0_seq1	1453	33	1	3.63807e-14	0.27	0.07	EFN60926	AT-rich interactive domain-containing protein 2 [Camponotus floridanus]	1	F:GO:0003677	F:DNA binding
Cflo_11039--NA	276	kmr25_comp85938_c1_seq3	1713	28	0.893	1.00735e-09	0.1	0.05	EFN70469	hypothetical protein EAG_10829 [Camponotus floridanus]	1	C:GO:0016021	C:integral component of membrane
Cflo_11094--XP_396824.1_APIME	377	kmr23_comp34535_c0_seq1	2310	377	0.891	0	1	0.49	EFN61812	Major royal jelly protein 1 [Camponotus floridanus]
Cflo_11133--XP_001121752.1_APIME	490	kmr23_comp69136_c10_seq1	1055	300	0.967	4.9066e-152	0.61	1	EFN65267	Fork head domain-containing protein crocodile [Camponotus floridanus]	3	F:GO:0003700; P:GO:0006355; F:GO:0043565	F:transcription factor activity, sequence-specific DNA binding; P:regulation of transcription, DNA-templated; F:sequence-specific DNA binding
Cflo_11189--XP_001120077.1_APIME	119	kmr23_comp72316_c0_seq1	463	119	0.79	3.18685e-66	1	0.78	EFN70508	Putative odorant-binding protein A10 [Camponotus floridanus]
Cflo_11195--XP_392064.3_APIME	427	kmr25_comp84346_c0_seq2	835	270	0.874	1.03885e-179	0.63	0.97	EFN70513	Thiol-specific monooxygenase [Camponotus floridanus]	4	F:GO:0050661; F:GO:0050660; P:GO:0055114; F:GO:0004499	F:NADP binding; F:flavin adenine dinucleotide binding; P:oxidation-reduction process; F:N,N-dimethylaniline monooxygenase activity	EC:1.14.13.8; EC:1.14.13	Flavin-containing monooxygenase; Acting on paired donors, with incorporation or reduction of molecular oxygen. The oxygen incorporated need not be derived from O(2)
Cflo_11214--NA	86	kmr27_comp90292_c0_seq4	1057	82	0.927	3.77087e-24	0.95	0.23	EFN63401	hypothetical protein EAG_05227 [Camponotus floridanus]
Cflo_11216--NA	61	kmr27_comp82379_c0_seq1	474	61	0.803	3.25635e-14	1	0.4	EFN72092	Zinc finger protein KIAA0543 [Camponotus floridanus]	2	F:GO:0003676; F:GO:0046983	F:nucleic acid binding; F:protein dimerization activity
Cflo_11264--XP_624146.2_APIME	671	kmr31_comp2872_c1_seq14	2780	671	0.975	0	1	0.72	EFN66682	Protein crooked neck [Camponotus floridanus]	1	P:GO:0006396	P:RNA processing
Cflo_11282--XP_001123009.1_APIME	122	kmr29_comp96541_c4_seq3	1130	89	0.798	4.84416e-45	0.73	0.26	EFN60981	Low molecular weight phosphotyrosine protein phosphatase 1 [Camponotus floridanus]	2	F:GO:0004725; P:GO:0035335	F:protein tyrosine phosphatase activity; P:peptidyl-tyrosine dephosphorylation	EC:3.1.3.16; EC:3.1.3.48; EC:3.1.3.41	Protein-serine/threonine phosphatase; Protein-tyrosine-phosphatase; 4-nitrophenylphosphatase
Cflo_11283--FBpp0086122_DROME	1409	kmr25_comp80634_c0_seq1	4538	1380	0.761	0	0.98	0.91	EFN60982	Apoptotic protease-activating factor 1 [Camponotus floridanus]	4	P:GO:0006508; P:GO:0042981; F:GO:0008233; F:GO:0043531	P:proteolysis; P:regulation of apoptotic process; F:peptidase activity; F:ADP binding
Cflo_11300--NP_001035323.1_APIME	423	kmr27_comp91225_c0_seq1	1624	421	0.81	0	1	0.89	EFN72236	Cytochrome P450 4C1 [Camponotus floridanus]	5	F:GO:0005506; F:GO:0016705; P:GO:0055114; F:GO:0004497; F:GO:0020037	F:iron ion binding; F:oxidoreductase activity, acting on paired donors, with incorporation or reduction of molecular oxygen; P:oxidation-reduction process; F:monooxygenase activity; F:heme binding
Cflo_11316--XP_392050.3_APIME	1206	kmr25_comp82769_c1_seq2	1762	563	0.837	0	0.47	0.96	EFN60210	Jouberin [Camponotus floridanus]
Cflo_11317--XP_395637.3_APIME	601	kmr23_comp68356_c0_seq1	1626	478	0.925	0	0.8	0.88	EFN60211	Dynein intermediate chain 2, axonemal [Camponotus floridanus]	1	F:GO:0003723	F:RNA binding
Cflo_11335--XP_392375.3_APIME	311	kmr23_comp68196_c5_seq1	1572	307	0.879	2.43703e-153	0.99	0.58	EFN70738	Dual specificity protein phosphatase 22 [Camponotus floridanus]	2	P:GO:0006470; F:GO:0008138	P:protein dephosphorylation; F:protein tyrosine/serine/threonine phosphatase activity	EC:3.1.3.16; EC:3.1.3.41	Protein-serine/threonine phosphatase; 4-nitrophenylphosphatase
Cflo_11357--NA	283	kmr23_comp60198_c0_seq1	996	253	0.719	8.18249e-108	0.89	0.77	EFN70462	hypothetical protein EAG_09843 [Camponotus floridanus]	2	P:GO:0008152; F:GO:0016798	P:metabolic process; F:hydrolase activity, acting on glycosyl bonds
Cflo_11374--NA	72	kmr25_comp83204_c0_seq1	1066	72	0.875	1.35519e-36	1	0.21	EFN71555	Transposable element Tc1 transposase [Camponotus floridanus]
Cflo_11387--XP_397107.3_APIME	629	kmr25_comp85064_c2_seq1	2994	577	0.842	0	0.92	0.58	EFN74069	Peroxisome biogenesis factor 1 [Camponotus floridanus]	4	C:GO:0005778; F:GO:0005524; P:GO:0006625; F:GO:0042623	C:peroxisomal membrane; F:ATP binding; P:protein targeting to peroxisome; F:ATPase activity, coupled	EC:3.6.1.3; EC:3.6.1.15	Adenosinetriphosphatase; Nucleoside-triphosphate phosphatase
Cflo_11423--NA	38	kmr25_comp76995_c1_seq7	197	30	0.833	7.0757e-08	0.79	0.46	EFN69392	hypothetical protein EAG_11523 [Camponotus floridanus]
Cflo_11466--XP_394212.3_APIME	747	kmr23_comp81507_c0_seq1	2155	473	0.846	0	0.63	0.68	EFN69193	Nose resistant to fluoxetine protein 6 [Camponotus floridanus]	2	F:GO:0016747; C:GO:0016021	F:transferase activity, transferring acyl groups other than amino-acyl groups; C:integral component of membrane
Cflo_11468--XP_001123301.1_APIME	94	kmr23_comp35096_c0_seq1	1409	94	0.787	6.79193e-43	1	0.2	EFN69195	UDP-glucuronosyltransferase 2A3 [Camponotus floridanus]	3	F:GO:0016758; P:GO:0008152; C:GO:0016021	F:transferase activity, transferring hexosyl groups; P:metabolic process; C:integral component of membrane
Cflo_11481--XP_001600107.1_NASVI	74	kmr27_comp82391_c0_seq1	496	74	0.811	3.76464e-37	1	0.45	EFN68993	hypothetical protein EAG_02454 [Camponotus floridanus]
Cflo_11562--XP_001602496.1_NASVI	226	kmr23_comp59126_c1_seq1	676	141	0.872	2.77976e-78	0.62	0.62	EFN73726	hypothetical protein EAG_09471 [Camponotus floridanus]
Cflo_11563--XP_001602496.1_NASVI	145	kmr23_comp59126_c1_seq1	676	134	0.918	3.1496e-82	0.92	0.62	EFN73727	hypothetical protein EAG_09472 [Camponotus floridanus]
Cflo_11566--XP_001599618.1_NASVI	1021	kmr23_comp70199_c20_seq1	1930	648	0.764	0	0.63	1	XP_001601554	PREDICTED: hypothetical protein LOC100117260 [Nasonia vitripennis]	1	F:GO:0003676	F:nucleic acid binding
Cflo_11572--XP_001599618.1_NASVI	898	kmr23_comp70199_c20_seq1	1930	589	0.772	0	0.66	0.99	XP_001601554	PREDICTED: hypothetical protein LOC100117260 [Nasonia vitripennis]	1	F:GO:0003676	F:nucleic acid binding
Cflo_11586--XP_393205.3_APIME	274	kmr23_comp51898_c0_seq1	1832	274	0.974	0	1	0.45	EFN72565	Neurotrimin [Camponotus floridanus]
Cflo_11670--XP_001122087.1_APIME	207	kmr29_comp90627_c0_seq2	780	207	0.981	1.01176e-134	1	0.8	EFN61298	Glutathione S-transferase [Camponotus floridanus]	1	F:GO:0016740	F:transferase activity
Cflo_11671--XP_395995.2_APIME	578	kmr27_comp89247_c2_seq1	3360	578	0.877	0	1	0.53	EFN61299	Solute carrier family 22 member 3 [Camponotus floridanus]	3	P:GO:0055085; F:GO:0022857; C:GO:0016021	P:transmembrane transport; F:transmembrane transporter activity; C:integral component of membrane
Cflo_11696--XP_393347.2_APIME	435	kmr27_comp43831_c0_seq1	412	102	0.833	2.19673e-48	0.23	0.74	EFN65763	hypothetical protein EAG_12163 [Camponotus floridanus]
Cflo_11725--NP_001011602.1_APIME	157	kmr29_comp92741_c1_seq2	1251	116	0.888	1.23099e-66	0.74	0.27	EFN61218	Protein bric-a-brac 2 [Camponotus floridanus]
Cflo_11732--XP_001123248.1_APIME	388	kmr23_comp52105_c2_seq1	1348	383	0.849	0	0.99	0.85	EFN60942	Lysocardiolipin acyltransferase [Camponotus floridanus]	3	F:GO:0016746; P:GO:0008152; C:GO:0016021	F:transferase activity, transferring acyl groups; P:metabolic process; C:integral component of membrane
Cflo_11779--XP_001120853.1_APIME	585	kmr25_comp83130_c1_seq2	1992	550	0.891	0	0.94	0.83	EFN74604	Sodium-independent sulfate anion transporter [Camponotus floridanus]	3	F:GO:0008271; C:GO:0016021; P:GO:1902358	F:secondary active sulfate transmembrane transporter activity; C:integral component of membrane; P:sulfate transmembrane transport
Cflo_11798--NA	148	kmr25_comp70647_c1_seq1	1017	88	0.898	4.36468e-47	0.59	0.26	EFN64471	hypothetical protein EAG_03561 [Camponotus floridanus]
Cflo_11799--BGIBMGA003589-PA_BOMMO	485	kmr25_comp70647_c1_seq1	1017	222	0.973	4.23934e-142	0.46	0.65	EFN64472	hypothetical protein EAG_03562 [Camponotus floridanus]
Cflo_11829--BGIBMGA010857-PA_BOMMO	34	kmr23_comp60606_c0_seq1	259	34	0.882	7.0703e-17	1	0.4	EFN68145	hypothetical protein EAG_05534 [Camponotus floridanus]
Cflo_11893--NA	99	kmr23_comp28874_c0_seq1	1066	93	0.892	1.34682e-49	0.94	0.26	EFN80244	Transposable element Tcb1 transposase [Harpegnathos saltator]
Cflo_11900--XP_001120738.1_APIME	120	kmr29_comp96624_c1_seq5	4841	62	0.984	3.53847e-36	0.52	0.04	EFN67512	hypothetical protein EAG_10874 [Camponotus floridanus]	1	F:GO:0030246	F:carbohydrate binding
Cflo_12004--XP_001607698.1_NASVI	105	kmr25_comp51246_c0_seq1	653	92	0.717	3.1527e-29	0.88	0.43	EFN67100	hypothetical protein EAG_03458 [Camponotus floridanus]	2	P:GO:0051726; P:GO:0006974	P:regulation of cell cycle; P:cellular response to DNA damage stimulus
Cflo_12078--XP_001122113.1_APIME	86	kmr23_comp54329_c0_seq1	481	86	0.988	1.48787e-55	1	0.54	EFN74701	Motor neuron and pancreas homeobox protein 1 [Camponotus floridanus]	2	C:GO:0005634; F:GO:0003677	C:nucleus; F:DNA binding
Cflo_12079--XP_001122113.1_APIME	540	kmr25_comp75807_c3_seq1	297	97	0.938	3.08954e-48	0.18	0.99	EFN74702	hypothetical protein EAG_08695 [Camponotus floridanus]
Cflo_12117--XP_001122017.1_APIME	1336	kmr29_comp95925_c1_seq4	6008	1336	0.932	0	1	0.67	EFN72131	Adenylate cyclase type 8 [Camponotus floridanus]	7	F:GO:0000166; P:GO:0006171; C:GO:0016021; C:GO:0005622; C:GO:0005886; F:GO:0004016; P:GO:0035556	F:nucleotide binding; P:cAMP biosynthetic process; C:integral component of membrane; C:intracellular; C:plasma membrane; F:adenylate cyclase activity; P:intracellular signal transduction	EC:4.6.1.1	Adenylate cyclase
Cflo_12137--XP_624985.2_APIME	198	kmr27_comp50798_c0_seq2	1576	198	0.874	1.99584e-104	1	0.38	EFN65219	hypothetical protein EAG_06978 [Camponotus floridanus]	1	C:GO:0016021	C:integral component of membrane
Cflo_12183--XP_394148.3_APIME	73	kmr27_comp91085_c3_seq14	426	73	0.753	4.72187e-31	1	0.52	EFN72185	Proto-oncogene tyrosine-protein kinase ROS [Camponotus floridanus]	5	F:GO:0005524; P:GO:0018108; F:GO:0004714; C:GO:0016020; P:GO:0007169	F:ATP binding; P:peptidyl-tyrosine phosphorylation; F:transmembrane receptor protein tyrosine kinase activity; C:membrane; P:transmembrane receptor protein tyrosine kinase signaling pathway	EC:2.7.10; EC:2.7.10.1; EC:2.7.11	Transferring phosphorus-containing groups; Receptor protein-tyrosine kinase; Transferring phosphorus-containing groups
Cflo_12192--XP_393388.3_APIME	255	kmr27_comp78417_c3_seq2	1032	224	0.866	4.81661e-141	0.88	0.65	EFN67917	Probable multidrug resistance-associated protein lethal(2)03659 [Camponotus floridanus]	4	F:GO:0005524; F:GO:0042626; P:GO:0055085; C:GO:0016021	F:ATP binding; F:ATPase activity, coupled to transmembrane movement of substances; P:transmembrane transport; C:integral component of membrane	EC:3.6.1.3; EC:3.6.1.15	Adenosinetriphosphatase; Nucleoside-triphosphate phosphatase
Cflo_12243--XP_395777.3_APIME	468	kmr27_comp90816_c0_seq4	2421	468	0.893	0	1	0.62	EFN67658	Sodium/potassium/calcium exchanger 5 [Camponotus floridanus]	2	P:GO:0055085; C:GO:0016021	P:transmembrane transport; C:integral component of membrane
Cflo_12288--XP_001599845.1_NASVI	163	kmr27_comp91650_c0_seq2	4089	163	0.798	9.68683e-85	1	0.12	EFN60888	hypothetical protein EAG_09275 [Camponotus floridanus]
Cflo_12290--FBpp0086788_DROME	101	kmr25_comp70008_c1_seq1	1775	101	0.743	3.57347e-47	1	0.18	EFN87938	Disks large-associated protein 5 [Harpegnathos saltator]	1	P:GO:0023052	P:signaling
Cflo_12299--XP_001602015.1_NASVI	429	kmr31_comp2856_c6_seq1	10500	429	0.711	0	1	0.12	EFN89572	hypothetical protein EAI_09107 [Harpegnathos saltator]	1	C:GO:0016021	C:integral component of membrane
Cflo_12311--XP_001599798.1_NASVI	105	kmr23_comp28172_c0_seq1	441	92	0.783	2.75519e-39	0.88	0.63	EFN66007	hypothetical protein EAG_09243 [Camponotus floridanus]
Cflo_12313--XP_001952064.1_ACYPI	73	kmr23_comp59510_c2_seq1	623	73	0.767	5.25482e-31	1	0.35	EFN66008	hypothetical protein EAG_09245 [Camponotus floridanus]
Cflo_12316--XP_001599618.1_NASVI	862	kmr23_comp70199_c20_seq1	1930	613	0.786	0	0.71	1	XP_001601554	PREDICTED: hypothetical protein LOC100117260 [Nasonia vitripennis]	1	F:GO:0003676	F:nucleic acid binding
Cflo_12429--XP_624587.2_APIME	87	kmr23_comp62298_c1_seq1	370	63	0.921	1.35332e-37	0.72	0.51	EFN61601	Laminin subunit alpha-1 [Camponotus floridanus]
Cflo_12452--XP_623912.1_APIME	450	kmr25_comp81483_c0_seq3	1805	425	0.932	0	0.94	0.71	EFN63186	Solute carrier family 23 member 2 [Camponotus floridanus]	3	P:GO:0055085; C:GO:0016021; F:GO:0005215	P:transmembrane transport; C:integral component of membrane; F:transporter activity
Cflo_12453--NA	334	kmr27_comp65350_c0_seq1	742	202	0.837	1.2905e-44	0.6	0.8	EFN64328	hypothetical protein EAG_02648 [Camponotus floridanus]
Cflo_12491--NA	67	kmr23_comp97343_c0_seq1	362	37	0.703	6.23108e-07	0.55	0.32	EFN73351	hypothetical protein EAG_02318 [Camponotus floridanus]
Cflo_12518--XP_001599039.1_NASVI	223	kmr29_comp97045_c0_seq6	1559	211	0.777	5.66479e-108	0.95	0.41	EFN61676	Uncharacterized protein F54H12.2 [Camponotus floridanus]
Cflo_12592--XP_001122054.1_APIME	112	kmr23_comp103757_c0_seq1	460	48	0.75	4.35709e-20	0.43	0.31	EFN64769	hypothetical protein EAG_11046 [Camponotus floridanus]	4	F:GO:0005549; C:GO:0016021; P:GO:0050911; F:GO:0004984	F:odorant binding; C:integral component of membrane; P:detection of chemical stimulus involved in sensory perception of smell; F:olfactory receptor activity
Cflo_12629--NA	89	kmr29_comp130379_c0_seq1	905	43	0.907	5.93649e-19	0.48	0.14	EFN71334	hypothetical protein EAG_11065 [Camponotus floridanus]
Cflo_12632--XP_001120154.1_APIME	246	kmr25_comp78480_c1_seq1	2002	178	0.994	6.66217e-71	0.72	0.27	EFN71336	Beta-1-syntrophin [Camponotus floridanus]	3	P:GO:0050808; C:GO:0016010; F:GO:0005198	P:synapse organization; C:dystrophin-associated glycoprotein complex; F:structural molecule activity
Cflo_12650--XP_395426.3_APIME	382	kmr31_comp2880_c0_seq1	7945	366	0.806	0	0.96	0.15	EFN69124	Fatty acid synthase [Camponotus floridanus]	2	P:GO:0008152; F:GO:0016740	P:metabolic process; F:transferase activity
Cflo_12658--XP_395426.3_APIME	1176	kmr31_comp2880_c0_seq1	7945	1176	0.795	0	1	0.47	EFN69129	Fatty acid synthase [Camponotus floridanus]	3	F:GO:0016491; P:GO:0055114; F:GO:0016740	F:oxidoreductase activity; P:oxidation-reduction process; F:transferase activity
Cflo_12726--XP_396282.3_APIME	1168	kmr23_comp67657_c0_seq1	1987	488	0.92	0	0.42	0.74	EFN67897	Kinesin-like protein KIF19 [Camponotus floridanus]	8	F:GO:0005524; F:GO:0003777; P:GO:0034220; C:GO:0016021; F:GO:0005230; P:GO:0007018; C:GO:0005874; F:GO:0008017	F:ATP binding; F:microtubule motor activity; P:ion transmembrane transport; C:integral component of membrane; F:extracellular ligand-gated ion channel activity; P:microtubule-based movement; C:microtubule; F:microtubule binding	EC:3.6.1.15	Nucleoside-triphosphate phosphatase
Cflo_12727--XP_001120493.1_APIME	810	kmr23_comp76501_c0_seq1	2486	788	0.893	0	0.97	0.95	EFN67898	WD repeat-containing protein SAZD [Camponotus floridanus]	2	C:GO:0032040; P:GO:0006364	C:small-subunit processome; P:rRNA processing
Cflo_12746--XP_001599800.1_NASVI	117	kmr27_comp86108_c1_seq2	594	82	0.72	2.42647e-35	0.7	0.41	EFN66986	hypothetical protein EAG_15618 [Camponotus floridanus]
Cflo_12827--XP_397107.3_APIME	326	kmr27_comp90124_c0_seq2	1474	322	0.947	0	0.99	0.66	EFN69115	Peroxisome biogenesis factor 1 [Camponotus floridanus]	4	C:GO:0005778; F:GO:0005524; P:GO:0006625; F:GO:0042623	C:peroxisomal membrane; F:ATP binding; P:protein targeting to peroxisome; F:ATPase activity, coupled	EC:3.6.1.3; EC:3.6.1.15	Adenosinetriphosphatase; Nucleoside-triphosphate phosphatase
Cflo_12951--XP_001120154.1_APIME	90	kmr27_comp85096_c1_seq3	1547	81	0.877	1.47408e-26	0.9	0.16	EFN64909	hypothetical protein EAG_01948 [Camponotus floridanus]	3	P:GO:0050808; C:GO:0016010; F:GO:0005198	P:synapse organization; C:dystrophin-associated glycoprotein complex; F:structural molecule activity
Cflo_12956--NA	335	kmr23_comp156396_c0_seq1	209	56	0.875	6.5439e-22	0.17	0.84	EFN69704	hypothetical protein EAG_07607 [Camponotus floridanus]
Cflo_12996--XP_001122550.1_APIME	144	kmr25_comp80956_c1_seq1	1184	144	0.722	6.45608e-67	1	0.37	EFN74653	hypothetical protein EAG_11867 [Camponotus floridanus]	2	F:GO:0003676; F:GO:0046983	F:nucleic acid binding; F:protein dimerization activity
Cflo_13029--NA	42	kmr29_comp96556_c11_seq41	285	42	0.833	1.5142e-17	1	0.45	EFN65356	hypothetical protein EAG_06564 [Camponotus floridanus]
Cflo_13163--XP_001947457.1_ACYPI	351	kmr25_comp84781_c1_seq5	1642	109	0.752	1.04719e-35	0.31	0.2	EFN68487	hypothetical protein EAG_06054 [Camponotus floridanus]	1	F:GO:0003676	F:nucleic acid binding
Cflo_13187--XP_001601665.1_NASVI	370	kmr27_comp91881_c0_seq3	1918	339	0.723	6.0609e-164	0.92	0.53	EFN62122	hypothetical protein EAG_03279 [Camponotus floridanus]
Cflo_13195--XP_395404.2_APIME	490	kmr29_comp94884_c0_seq1	2790	490	0.951	0	1	0.53	EFN70702	Large neutral amino acids transporter small subunit 2 [Camponotus floridanus]	3	C:GO:0016021; F:GO:0015171; P:GO:0003333	C:integral component of membrane; F:amino acid transmembrane transporter activity; P:amino acid transmembrane transport
Cflo_13218--XP_001120482.1_APIME	174	kmr31_comp3912_c0_seq1	1285	174	0.713	1.09725e-57	1	0.42	EFN64265	hypothetical protein EAG_05287 [Camponotus floridanus]	1	C:GO:0016021	C:integral component of membrane
Cflo_13219--NA	102	kmr23_comp70026_c0_seq1	1853	27	0.815	0.000138572	0.26	0.05	EFN63232	hypothetical protein EAG_07293 [Camponotus floridanus]
Cflo_13304--FBpp0080430_DROME	71	kmr23_comp60545_c0_seq1	521	70	0.729	2.62886e-30	0.99	0.4	EFN73460	hypothetical protein EAG_14195 [Camponotus floridanus]
Cflo_13324--XP_395379.3_APIME	58	kmr27_comp90746_c1_seq1	2352	58	0.724	1.2287e-18	1	0.07	EFN65010	Fatty acyl-CoA reductase 2 [Camponotus floridanus]	2	P:GO:0055114; F:GO:0080019	P:oxidation-reduction process; F:fatty-acyl-CoA reductase (alcohol-forming) activity
Cflo_13357--XP_001602640.1_NASVI	85	kmr27_comp90265_c1_seq2	427	85	0.729	3.4915e-40	1	0.6	EFN63882	Retrovirus-related Pol polyprotein from transposon 412 [Camponotus floridanus]
Cflo_13363--XP_001602015.1_NASVI	590	kmr23_comp70189_c11_seq1	1851	560	0.721	0	0.95	0.92	EFN89572	hypothetical protein EAI_09107 [Harpegnathos saltator]	1	C:GO:0016021	C:integral component of membrane
Cflo_13419--XP_001121191.1_APIME	72	kmr25_comp84641_c0_seq1	2910	71	1	3.68009e-41	0.99	0.07	EFN64877	Transcription factor HES-4 [Camponotus floridanus]	1	F:GO:0046983	F:protein dimerization activity
Cflo_13427--XP_395426.3_APIME	272	kmr31_comp2880_c0_seq1	7945	272	0.783	6.04473e-122	1	0.1	EFN62488	Fatty acid synthase [Camponotus floridanus]	2	F:GO:0016491; P:GO:0055114	F:oxidoreductase activity; P:oxidation-reduction process
Cflo_13473--NA	216	kmr29_comp96997_c3_seq1	1325	57	0.86	1.77715e-25	0.26	0.13	EFN64880	hypothetical protein EAG_09127 [Camponotus floridanus]
Cflo_13480--NA	748	kmr27_comp91495_c1_seq1	3522	601	0.745	0	0.8	0.59	EFN69475	hypothetical protein EAG_15237 [Camponotus floridanus]	1	F:GO:0003676	F:nucleic acid binding
Cflo_13487--NA	53	kmr29_comp96871_c0_seq7	1263	48	0.75	4.94011e-16	0.91	0.11	EFN73466	hypothetical protein EAG_08786 [Camponotus floridanus]
Cflo_13602--NA	73	kmr25_comp81253_c1_seq1	473	73	0.753	5.59524e-14	1	0.4	EFN72092	Zinc finger protein KIAA0543 [Camponotus floridanus]	1	F:GO:0005488	F:binding
Cflo_13619--XP_625189.1_APIME	448	kmr27_comp43824_c0_seq2	1984	247	0.781	3.66249e-133	0.55	0.38	EFN65085	Uncharacterized protein F44E2.2 [Camponotus floridanus]	1	F:GO:0005507	F:copper ion binding
Cflo_13640--XP_001600107.1_NASVI	75	kmr23_comp59510_c2_seq1	623	75	0.787	1.34134e-36	1	0.36	EFN63262	hypothetical protein EAG_08149 [Camponotus floridanus]
Cflo_13646--XP_001599618.1_NASVI	659	kmr23_comp70199_c20_seq1	1930	483	0.793	0	0.73	0.77	XP_001809187	PREDICTED: similar to predicted protein, partial [Tribolium castaneum]
Cflo_13658--XP_001601385.1_NASVI	758	kmr23_comp70199_c20_seq1	1930	517	0.781	0	0.68	0.89	XP_001809187	PREDICTED: similar to predicted protein, partial [Tribolium castaneum]
Cflo_13671--XP_624966.1_APIME	419	kmr31_comp2838_c2_seq4	3614	416	0.769	0	0.99	0.35	EFN67149	Lipase 3 [Camponotus floridanus]	2	F:GO:0016788; P:GO:0016042	F:hydrolase activity, acting on ester bonds; P:lipid catabolic process
Cflo_13709--XP_001601665.1_NASVI	329	kmr27_comp91881_c0_seq3	1918	329	0.702	2.0914e-167	1	0.51	EFN62122	hypothetical protein EAG_03279 [Camponotus floridanus]
Cflo_13780--XP_394182.3_APIME	318	kmr23_comp46330_c0_seq1	2405	275	0.807	6.9381e-151	0.86	0.34	EFN63558	Synaptic vesicle glycoprotein 2A [Camponotus floridanus]	3	P:GO:0055085; F:GO:0022857; C:GO:0016021	P:transmembrane transport; F:transmembrane transporter activity; C:integral component of membrane
Cflo_13785--NA	434	kmr25_comp81483_c0_seq4	1236	32	0.781	4.69863e-10	0.07	0.08	EFN64254	hypothetical protein EAG_00798 [Camponotus floridanus]
Cflo_13924--NA	198	kmr27_comp91884_c0_seq3	1271	118	0.746	6.54768e-40	0.6	0.39	EFN64223	hypothetical protein EAG_04530 [Camponotus floridanus]
Cflo_13985--XP_001945289.1_ACYPI	101	kmr29_comp94139_c2_seq4	927	101	0.743	6.10327e-50	1	0.33	EFN60346	hypothetical protein EAG_01319 [Camponotus floridanus]
Cflo_13986--XP_001601154.1_NASVI	397	kmr25_comp82871_c0_seq2	1465	250	0.804	1.15763e-140	0.63	0.51	EFN60347	hypothetical protein EAG_01320 [Camponotus floridanus]
Cflo_14013--XP_001600107.1_NASVI	90	kmr23_comp59510_c2_seq1	623	90	0.722	3.15623e-40	1	0.43	EFN69639	hypothetical protein EAG_01986 [Camponotus floridanus]
Cflo_14018--XP_396261.2_APIME	301	kmr27_comp91575_c0_seq17	2465	294	0.711	2.6375e-139	0.98	0.36	EFN74467	Aminopeptidase N [Camponotus floridanus]	4	F:GO:0008270; P:GO:0006508; F:GO:0004177; F:GO:0008237	F:zinc ion binding; P:proteolysis; F:aminopeptidase activity; F:metallopeptidase activity	EC:3.4.11	Acting on peptide bonds (peptidases)
Cflo_14021--NA	63	kmr29_comp96871_c0_seq7	1263	63	0.73	6.52742e-26	1	0.15	EFN70230	hypothetical protein EAG_12167 [Camponotus floridanus]
Cflo_14055--XP_001600827.1_NASVI	86	kmr23_comp141220_c0_seq1	505	86	0.826	4.55368e-47	1	0.52	XP_001947664	PREDICTED: hypothetical protein LOC100160378, partial [Acyrthosiphon pisum]
Cflo_14075--NA	31	kmr29_comp68773_c0_seq2	149	28	0.786	4.50483e-08	0.9	0.57	EFN70403	hypothetical protein EAG_09482 [Camponotus floridanus]
Cflo_14172--XP_001599119.1_NASVI	228	kmr29_comp97011_c0_seq2	1226	228	0.789	2.89959e-123	1	0.57	XP_002170385	PREDICTED: similar to predicted protein, partial [Hydra magnipapillata]
Cflo_14283--XP_001603880.1_NASVI	48	kmr27_comp85940_c1_seq1	816	48	0.812	6.16581e-24	1	0.18	EFN74289	hypothetical protein EAG_07443 [Camponotus floridanus]	1	F:GO:0003676	F:nucleic acid binding
Cflo_14290--XP_624966.1_APIME	355	kmr27_comp90532_c2_seq19	1710	354	0.718	0	1	0.64	EFN62712	Lipase 1 [Camponotus floridanus]	2	F:GO:0016788; P:GO:0006629	F:hydrolase activity, acting on ester bonds; P:lipid metabolic process
Cflo_14326--XP_001599618.1_NASVI	462	kmr23_comp70199_c20_seq1	1930	275	0.8	4.89242e-145	0.6	0.44	XP_001809187	PREDICTED: similar to predicted protein, partial [Tribolium castaneum]
Cflo_14328--XP_001600107.1_NASVI	94	kmr23_comp59510_c2_seq1	623	93	0.753	5.54357e-46	0.99	0.45	EFN69639	hypothetical protein EAG_01986 [Camponotus floridanus]
Cflo_14365--XP_001602015.1_NASVI	340	kmr31_comp2856_c6_seq1	10500	340	0.712	2.28687e-159	1	0.1	EFN89572	hypothetical protein EAI_09107 [Harpegnathos saltator]	2	C:GO:0016020; C:GO:0016021	C:membrane; C:integral component of membrane
Cflo_14420--XP_001121492.1_APIME	534	kmr27_comp82077_c0_seq7	1493	189	0.873	1.4918e-105	0.35	0.38	EFN69709	Tyrosine kinase receptor Cad96Ca [Camponotus floridanus]	4	F:GO:0005524; P:GO:0018108; F:GO:0004713; C:GO:0016020	F:ATP binding; P:peptidyl-tyrosine phosphorylation; F:protein tyrosine kinase activity; C:membrane	EC:2.7.10	Transferring phosphorus-containing groups
Cflo_14459--XP_001119867.1_APIME	59	kmr25_comp85898_c1_seq1	2847	59	0.729	6.70509e-22	1	0.07	EFN60190	Aminopeptidase N [Camponotus floridanus]	2	P:GO:0006508; F:GO:0004177	P:proteolysis; F:aminopeptidase activity	EC:3.4.11	Acting on peptide bonds (peptidases)
Cflo_14485--XP_001600044.1_NASVI	359	kmr25_comp85687_c0_seq7	1553	354	0.709	5.87197e-156	0.99	0.72	EFN65838	hypothetical protein EAG_07724 [Camponotus floridanus]
Cflo_14509--BGIBMGA008698-PA_BOMMO	121	kmr27_comp91856_c0_seq1	701	121	0.711	1.55547e-33	1	0.51	EFN64048	hypothetical protein EAG_09261 [Camponotus floridanus]
Cflo_14527--XP_001602496.1_NASVI	255	kmr23_comp59126_c1_seq1	676	225	0.738	5.8758e-122	0.88	1	EFN66859	hypothetical protein EAG_05479 [Camponotus floridanus]
Cflo_14568--NA	50	kmr31_comp9652_c0_seq1	1249	48	0.708	7.56803e-19	0.96	0.12	EFN74898	hypothetical protein EAG_09141 [Camponotus floridanus]
Cflo_14586--XP_001599618.1_NASVI	758	kmr23_comp70199_c20_seq1	1930	578	0.709	0	0.76	0.91	XP_001809187	PREDICTED: similar to predicted protein, partial [Tribolium castaneum]
Cflo_14597--XP_001601554.1_NASVI	505	kmr29_comp97047_c0_seq1	1406	463	0.797	0	0.92	0.99	XP_001602054	PREDICTED: hypothetical protein LOC100117944, partial [Nasonia vitripennis]
Cflo_14608--NA	103	kmr23_comp69483_c6_seq1	608	62	0.806	3.34641e-25	0.6	0.31	EFN70003	hypothetical protein EAG_08603 [Camponotus floridanus]
Cflo_14656--XP_001600107.1_NASVI	87	kmr23_comp59510_c2_seq1	623	87	0.747	3.09314e-37	1	0.43	EFN73362	hypothetical protein EAG_15832 [Camponotus floridanus]
Cflo_14774--NA	107	kmr27_comp91884_c0_seq3	1271	71	0.887	7.27034e-36	0.66	0.17	EFN62345	hypothetical protein EAG_02026 [Camponotus floridanus]
Cflo_14785--XP_001607349.1_NASVI	235	kmr31_comp2856_c6_seq1	10500	235	0.77	1.68557e-121	1	0.07	EFN89572	hypothetical protein EAI_09107 [Harpegnathos saltator]	1	C:GO:0016021	C:integral component of membrane
Cflo_14833--XP_001600107.1_NASVI	94	kmr27_comp82391_c0_seq1	496	77	0.779	5.94795e-36	0.82	0.45	EFN69639	hypothetical protein EAG_01986 [Camponotus floridanus]
Cflo_14845--XP_001600400.1_NASVI	107	kmr27_comp91806_c0_seq1	2456	107	0.72	4.45342e-49	1	0.13	EFN65930	hypothetical protein EAG_15491 [Camponotus floridanus]
Cflo_14857--XP_001950190.1_ACYPI	269	kmr23_comp66001_c3_seq1	2217	269	0.859	1.2799e-158	1	0.37	EFN62048	hypothetical protein EAG_05625 [Camponotus floridanus]
Cflo_14858--XP_001949664.1_ACYPI	146	kmr23_comp66001_c4_seq1	540	120	0.833	6.64875e-67	0.82	0.67	EFN63366	120.7 kDa protein in NOF-FB transposable element [Camponotus floridanus]
Cflo_14860--XP_396261.2_APIME	422	kmr27_comp91575_c0_seq17	2465	287	0.749	9.91772e-147	0.68	0.39	EFN66879	Aminopeptidase N [Camponotus floridanus]	5	F:GO:0008270; P:GO:0006508; C:GO:0016021; F:GO:0004177; F:GO:0008237	F:zinc ion binding; P:proteolysis; C:integral component of membrane; F:aminopeptidase activity; F:metallopeptidase activity	EC:3.4.11	Acting on peptide bonds (peptidases)
Cflo_14902--XP_001602496.1_NASVI	494	kmr23_comp59126_c1_seq1	676	212	0.892	4.39275e-138	0.43	0.94	XP_002170369	PREDICTED: hypothetical protein [Hydra magnipapillata]
Cflo_14914--XP_001600107.1_NASVI	90	kmr27_comp82391_c0_seq1	496	75	0.827	3.43995e-39	0.83	0.45	EFN69946	hypothetical protein EAG_15644 [Camponotus floridanus]
Cflo_14990--XP_001952064.1_ACYPI	87	kmr27_comp82391_c0_seq1	496	72	0.778	4.67729e-34	0.83	0.45	EFN69639	hypothetical protein EAG_01986 [Camponotus floridanus]
Cflo_15025--XP_001601154.1_NASVI	402	kmr27_comp91365_c0_seq1	1658	389	0.864	0	0.97	0.71	EFN89121	hypothetical protein EAI_12487 [Harpegnathos saltator]
Cflo_15047--XP_001945289.1_ACYPI	60	kmr23_comp35767_c0_seq1	460	60	0.75	3.80527e-26	1	0.4	EFN62560	hypothetical protein EAG_05780 [Camponotus floridanus]
Cflo_15107--NA	74	kmr29_comp96871_c0_seq7	1263	74	0.784	5.56143e-34	1	0.18	EFN64442	hypothetical protein EAG_07206 [Camponotus floridanus]
Cflo_15172--XP_001120077.1_APIME	119	kmr23_comp72316_c0_seq1	463	119	0.824	3.27829e-55	1	0.78	EFN72346	Ejaculatory bulb-specific protein 3 [Camponotus floridanus]
Cflo_15175--XP_001945983.1_ACYPI	237	kmr25_comp83897_c0_seq1	696	126	0.802	7.51978e-68	0.53	0.54	EFN75251	Transposable element P transposase [Harpegnathos saltator]	2	F:GO:0004803; P:GO:0006313	F:transposase activity; P:transposition, DNA-mediated
Cflo_15240--XP_001599213.1_NASVI	596	kmr23_comp59126_c1_seq1	676	217	0.848	1.61264e-122	0.36	1	XP_001185162	PREDICTED: uncharacterized protein LOC754317 [Strongylocentrotus purpuratus]
Cflo_15259--XP_393882.2_APIME	97	kmr25_comp83332_c0_seq6	1009	82	0.915	1.03672e-51	0.85	0.24	EFN70903	hypothetical protein EAG_05650 [Camponotus floridanus]	2	P:GO:0006508; F:GO:0004252	P:proteolysis; F:serine-type endopeptidase activity	EC:3.4.21	Acting on peptide bonds (peptidases)
Cflo_15263--XP_001952064.1_ACYPI	86	kmr23_comp59510_c2_seq1	623	86	0.791	9.27901e-40	1	0.42	EFN69639	hypothetical protein EAG_01986 [Camponotus floridanus]
Cflo_15264--XP_396261.2_APIME	383	kmr29_comp95539_c0_seq3	3045	375	0.715	0	0.98	0.37	EFN65555	Puromycin-sensitive aminopeptidase [Camponotus floridanus]	4	F:GO:0008270; P:GO:0006508; F:GO:0004177; F:GO:0008237	F:zinc ion binding; P:proteolysis; F:aminopeptidase activity; F:metallopeptidase activity	EC:3.4.11	Acting on peptide bonds (peptidases)
Cflo_15283--XP_395426.3_APIME	357	kmr31_comp2880_c0_seq1	7945	313	0.719	6.8093e-142	0.88	0.12	EFN74719	Fatty acid synthase [Camponotus floridanus]	2	P:GO:0008152; F:GO:0016740	P:metabolic process; F:transferase activity
Cflo_15301--XP_001601608.1_NASVI	356	kmr23_comp85261_c0_seq1	476	156	0.821	5.39453e-85	0.44	1	EFZ10771	hypothetical protein SINV_08869 [Solenopsis invicta]
Cflo_15332--XP_001600707.1_NASVI	188	kmr29_comp97053_c0_seq2	3309	188	0.713	1.02487e-88	1	0.17	EFN63805	Retrovirus-related Pol polyprotein from transposon 412 [Camponotus floridanus]	1	F:GO:0003676	F:nucleic acid binding
Cflo_15337--NP_001011597.1_APIME	435	kmr25_comp82473_c0_seq6	1945	432	0.928	0	0.99	0.67	EFN74756	Excitatory amino acid transporter [Camponotus floridanus]	4	P:GO:0006835; P:GO:0055085; F:GO:0017153; C:GO:0016021	P:dicarboxylic acid transport; P:transmembrane transport; F:sodium:dicarboxylate symporter activity; C:integral component of membrane
Cflo_15357--XP_624780.2_APIME	409	kmr27_comp87150_c2_seq4	1908	387	0.721	0	0.95	0.61	EFN64072	Protein son of sevenless [Camponotus floridanus]	7	F:GO:0003677; P:GO:0035023; F:GO:0046982; P:GO:0007264; F:GO:0005089; C:GO:0005622; P:GO:0043547	F:DNA binding; P:regulation of Rho protein signal transduction; F:protein heterodimerization activity; P:small GTPase mediated signal transduction; F:Rho guanyl-nucleotide exchange factor activity; C:intracellular; P:positive regulation of GTPase activity
Cflo_15391--XP_001603574.1_NASVI	326	kmr23_comp63813_c0_seq1	117	37	0.919	5.66423e-16	0.11	0.95	EFN73862	Zinc finger BED domain-containing protein 5 [Camponotus floridanus]	1	F:GO:0003676	F:nucleic acid binding
Cflo_15407--XP_394245.2_APIME	122	kmr29_comp95539_c0_seq3	3045	122	0.713	3.28932e-55	1	0.12	EFN64941	Thyrotropin-releasing hormone-degrading ectoenzyme [Camponotus floridanus]	4	F:GO:0008270; P:GO:0006508; F:GO:0004177; F:GO:0008237	F:zinc ion binding; P:proteolysis; F:aminopeptidase activity; F:metallopeptidase activity	EC:3.4.11	Acting on peptide bonds (peptidases)
Cflo_15419--XP_001600107.1_NASVI	79	kmr23_comp59510_c2_seq1	623	79	0.759	4.53453e-36	1	0.38	EFN66854	hypothetical protein EAG_12125 [Camponotus floridanus]
Cflo_15442--XP_001120719.1_APIME	103	kmr27_comp91736_c0_seq1	943	103	0.728	2.62032e-49	1	0.33	EFN71735	Histone-lysine N-methyltransferase SETMAR [Camponotus floridanus]	2	F:GO:0008168; P:GO:0032259	F:methyltransferase activity; P:methylation
Cflo_15448--XP_396261.2_APIME	144	kmr25_comp84685_c1_seq1	2390	137	0.737	1.50659e-61	0.95	0.17	EFN68584	Aminopeptidase N [Camponotus floridanus]	5	F:GO:0008270; P:GO:0006508; C:GO:0016021; F:GO:0004177; F:GO:0008237	F:zinc ion binding; P:proteolysis; C:integral component of membrane; F:aminopeptidase activity; F:metallopeptidase activity	EC:3.4.11	Acting on peptide bonds (peptidases)
Cflo_15463--XP_396261.2_APIME	380	kmr29_comp95539_c0_seq3	3045	380	0.726	0	1	0.37	EFN62042	Puromycin-sensitive aminopeptidase [Camponotus floridanus]	4	F:GO:0008270; P:GO:0006508; F:GO:0004177; F:GO:0008237	F:zinc ion binding; P:proteolysis; F:aminopeptidase activity; F:metallopeptidase activity	EC:3.4.11	Acting on peptide bonds (peptidases)
Cflo_15488--NA	65	kmr25_comp83897_c0_seq1	696	65	0.815	2.14688e-31	1	0.28	EFN69004	hypothetical protein EAG_07270 [Camponotus floridanus]
Cflo_15494--XP_624966.1_APIME	247	kmr23_comp69268_c0_seq1	1082	226	0.712	2.0247e-119	0.91	0.63	EFN72533	Lipase 1 [Camponotus floridanus]	1	P:GO:0006629	P:lipid metabolic process
Cflo_15523--XP_001119981.1_APIME	503	kmr27_comp81371_c0_seq1	1766	501	0.81	0	1	0.85	EFN69793	Cytochrome P450 9e2 [Camponotus floridanus]	6	F:GO:0005506; F:GO:0016705; C:GO:0016021; P:GO:0055114; F:GO:0004497; F:GO:0020037	F:iron ion binding; F:oxidoreductase activity, acting on paired donors, with incorporation or reduction of molecular oxygen; C:integral component of membrane; P:oxidation-reduction process; F:monooxygenase activity; F:heme binding
Cflo_15541--XP_001949625.1_ACYPI	65	kmr23_comp79759_c0_seq1	1116	65	0.708	3.62405e-26	1	0.17	EFN74286	hypothetical protein EAG_07845 [Camponotus floridanus]	1	F:GO:0003676	F:nucleic acid binding
Cflo_15543--XP_001599687.1_NASVI	134	kmr27_comp91620_c0_seq1	1933	92	0.761	3.72893e-49	0.69	0.14	EFN64110	hypothetical protein EAG_00260 [Camponotus floridanus]
Cflo_15583--XP_395426.3_APIME	430	kmr31_comp2880_c0_seq1	7945	428	0.752	0	1	0.16	EFN74824	Fatty acid synthase [Camponotus floridanus]	4	F:GO:0016491; C:GO:0016021; P:GO:0055114; F:GO:0016740	F:oxidoreductase activity; C:integral component of membrane; P:oxidation-reduction process; F:transferase activity
Cflo_15639--XP_392360.2_APIME	213	kmr25_comp84966_c0_seq14	711	134	0.784	1.33311e-69	0.63	0.57	EFN72555	Feline leukemia virus subgroup C receptor-related protein 1 [Camponotus floridanus]	2	P:GO:0055085; C:GO:0016021	P:transmembrane transport; C:integral component of membrane
Cflo_15658--XP_001602015.1_NASVI	85	kmr29_comp86752_c0_seq1	396	84	0.786	8.48076e-40	0.99	0.64	EFN68951	hypothetical protein EAG_02025 [Camponotus floridanus]
Cflo_15670--XP_001603636.1_NASVI	87	kmr25_comp78176_c1_seq4	459	72	0.847	9.22532e-38	0.83	0.47	EFN63136	hypothetical protein EAG_00582 [Camponotus floridanus]	4	F:GO:0008527; P:GO:0007165; C:GO:0016021; P:GO:0050912	F:taste receptor activity; P:signal transduction; C:integral component of membrane; P:detection of chemical stimulus involved in sensory perception of taste
Cflo_15681--XP_001950583.1_ACYPI	99	kmr23_comp69198_c9_seq1	745	99	0.798	6.19583e-54	1	0.4	EFN60641	hypothetical protein EAG_09717 [Camponotus floridanus]
Cflo_15696--BGIBMGA006130-PA_BOMMO	86	kmr29_comp57904_c0_seq1	391	63	0.794	7.35606e-29	0.73	0.49	EFN65356	hypothetical protein EAG_06564 [Camponotus floridanus]
Cflo_15734--XP_395426.3_APIME	133	kmr31_comp2880_c0_seq10	1119	133	0.729	1.11807e-58	1	0.37	EFN74408	Fatty acid synthase [Camponotus floridanus]	3	F:GO:0016491; P:GO:0055114; F:GO:0016740	F:oxidoreductase activity; P:oxidation-reduction process; F:transferase activity
Cflo_15771--XP_397272.2_APIME	71	kmr29_comp96315_c1_seq18	725	67	0.746	4.80949e-34	0.94	0.28	EFN66724	Probable cytochrome P450 6t1 [Camponotus floridanus]	5	F:GO:0005506; F:GO:0016705; P:GO:0055114; F:GO:0004497; F:GO:0020037	F:iron ion binding; F:oxidoreductase activity, acting on paired donors, with incorporation or reduction of molecular oxygen; P:oxidation-reduction process; F:monooxygenase activity; F:heme binding
Cflo_15783--XP_001602541.1_NASVI	164	kmr25_comp76454_c0_seq1	953	136	0.882	1.03972e-71	0.83	0.43	EFN74292	hypothetical protein EAG_13555 [Camponotus floridanus]
Cflo_15815--XP_001602541.1_NASVI	275	kmr27_comp87352_c0_seq2	1109	220	0.882	4.26174e-122	0.8	0.6	EFZ16492	hypothetical protein SINV_16054 [Solenopsis invicta]	1	F:GO:0003677	F:DNA binding
Cflo_15867--XP_395426.3_APIME	183	kmr23_comp70186_c1_seq1	1190	183	0.738	4.46352e-78	1	0.5	EFN75053	Fatty acid synthase [Camponotus floridanus]	2	F:GO:0003824; P:GO:0008152	F:catalytic activity; P:metabolic process
Cflo_15947--XP_001602739.1_NASVI	115	kmr25_comp84090_c0_seq1	704	75	0.827	1.74187e-35	0.65	0.32	XP_003740984	PREDICTED: uncharacterized protein LOC100902978 [Metaseiulus occidentalis]
Cflo_15965--XP_001602496.1_NASVI	215	kmr23_comp59126_c1_seq1	676	157	0.822	1.55432e-86	0.73	0.67	EFN73726	hypothetical protein EAG_09471 [Camponotus floridanus]
Cflo_15968--XP_396268.2_APIME	231	kmr25_comp86052_c5_seq1	12084	231	0.861	2.17896e-135	1	0.06	EFN63391	Fatty acid synthase [Camponotus floridanus]	6	F:GO:0016788; F:GO:0016491; P:GO:0055114; F:GO:0031177; P:GO:0009058; F:GO:0016740	F:hydrolase activity, acting on ester bonds; F:oxidoreductase activity; P:oxidation-reduction process; F:phosphopantetheine binding; P:biosynthetic process; F:transferase activity
Cflo_15982--XP_624680.2_APIME	99	kmr23_comp37193_c0_seq1	924	99	0.758	1.56137e-45	1	0.32	EFN70271	Trypsin [Camponotus floridanus]	2	P:GO:0006508; F:GO:0004252	P:proteolysis; F:serine-type endopeptidase activity	EC:3.4.21	Acting on peptide bonds (peptidases)
Cflo_16045--XP_001952164.1_ACYPI	245	kmr25_comp37674_c0_seq1	604	96	0.885	1.26118e-55	0.39	0.48	EFN64517	General transcription factor II-I repeat domain-containing protein 2A [Camponotus floridanus]	2	F:GO:0003676; F:GO:0046983	F:nucleic acid binding; F:protein dimerization activity
Cflo_16060--NA	72	kmr25_comp83332_c0_seq6	1009	62	0.774	6.80149e-25	0.86	0.2	EFN67670	hypothetical protein EAG_11857 [Camponotus floridanus]
Cflo_16075--XP_001602541.1_NASVI	258	kmr29_comp93515_c0_seq4	1075	258	0.915	9.01094e-175	1	0.72	EFN66683	hypothetical protein EAG_00454 [Camponotus floridanus]
Cflo_16172--XP_001600107.1_NASVI	48	kmr27_comp82391_c0_seq1	496	47	0.787	7.38396e-21	0.98	0.28	EFN69639	hypothetical protein EAG_01986 [Camponotus floridanus]
Cflo_16203--XP_396494.3_APIME	127	kmr23_comp37798_c0_seq1	1575	125	0.824	6.01601e-67	0.98	0.24	EFN61275	Ecdysteroid UDP-glucosyltransferase [Camponotus floridanus]	3	F:GO:0016758; P:GO:0008152; C:GO:0016021	F:transferase activity, transferring hexosyl groups; P:metabolic process; C:integral component of membrane
Cflo_16334--XP_396494.3_APIME	70	kmr23_comp37798_c0_seq1	1575	43	0.791	2.25171e-17	0.61	0.08	EFN65485	UDP-glucuronosyltransferase 2A3 [Camponotus floridanus]	3	F:GO:0016758; P:GO:0008152; C:GO:0016021	F:transferase activity, transferring hexosyl groups; P:metabolic process; C:integral component of membrane
Cflo_16355--XP_001121779.1_APIME	99	kmr23_comp35096_c0_seq1	1409	99	0.768	7.11624e-49	1	0.21	EFN61312	Ecdysteroid UDP-glucosyltransferase [Camponotus floridanus]	2	F:GO:0016758; P:GO:0008152	F:transferase activity, transferring hexosyl groups; P:metabolic process
Cflo_16366--XP_396261.2_APIME	80	kmr29_comp96964_c0_seq15	416	78	0.756	1.55991e-39	0.97	0.57	EFN65132	Aminopeptidase N [Camponotus floridanus]	2	P:GO:0006508; F:GO:0004177	P:proteolysis; F:aminopeptidase activity	EC:3.4.11	Acting on peptide bonds (peptidases)
Cflo_16445--XP_624772.1_APIME	33	kmr23_comp33418_c0_seq1	2518	33	0.97	1.44199e-14	1	0.04	EFZ22515	hypothetical protein SINV_15309 [Solenopsis invicta]
Cflo_16499--NA	81	kmr25_comp52870_c0_seq1	368	69	0.71	5.56581e-25	0.85	0.57	EFN69218	hypothetical protein EAG_08154 [Camponotus floridanus]
Cflo_16530--XP_001604417.1_NASVI	104	kmr23_comp36542_c1_seq1	866	104	0.875	1.26164e-61	1	0.36	EFN64579	hypothetical protein EAG_00178 [Camponotus floridanus]
Cflo_16554--XP_392857.2_APIME	70	kmr25_comp85948_c1_seq13	428	70	0.729	2.463e-29	1	0.51	EFN71319	Lysosomal aspartic protease [Camponotus floridanus]	2	F:GO:0004190; P:GO:0006508	F:aspartic-type endopeptidase activity; P:proteolysis	EC:3.4.23	Acting on peptide bonds (peptidases)
Cflo_16569--XP_001950042.1_ACYPI	56	kmr27_comp90749_c1_seq4	1003	56	0.911	1.64321e-30	1	0.17	EFN61544	hypothetical protein EAG_00143 [Camponotus floridanus]
Cflo_16582--NA	91	kmr25_comp82121_c0_seq1	669	91	0.747	2.7804e-34	1	0.41	EFN64525	hypothetical protein EAG_00132 [Camponotus floridanus]	1	F:GO:0003677	F:DNA binding
Cflo_16597--XP_397272.2_APIME	54	kmr25_comp85932_c1_seq20	428	53	0.736	3.15766e-23	0.98	0.37	EFN60503	hypothetical protein EAG_00117 [Camponotus floridanus]	5	F:GO:0005506; F:GO:0016705; P:GO:0055114; F:GO:0004497; F:GO:0020037	F:iron ion binding; F:oxidoreductase activity, acting on paired donors, with incorporation or reduction of molecular oxygen; P:oxidation-reduction process; F:monooxygenase activity; F:heme binding
Cflo_16636--XP_001599510.1_NASVI	78	kmr23_comp51301_c1_seq1	843	78	0.833	8.22559e-41	1	0.28	EFN74247	Retrovirus-related Pol polyprotein from transposon 17.6 [Camponotus floridanus]
Cflo_16693--XP_001945169.1_ACYPI	52	kmr29_comp96281_c2_seq1	930	52	0.712	1.00643e-16	1	0.17	EFN65182	hypothetical protein EAG_00022 [Camponotus floridanus]
Cflo_16715--NA	43	kmr25_comp83318_c1_seq1	1277	43	0.93	4.73692e-20	1	0.1	EFN71442	hypothetical protein EAG_04034 [Camponotus floridanus]
Cflo_16717--XP_001122397.1_APIME	65	kmr27_comp91736_c0_seq1	943	65	0.8	4.57363e-33	1	0.21	EGI61179	Mariner Mos1 transposase [Acromyrmex echinatior]	2	F:GO:0008168; P:GO:0032259	F:methyltransferase activity; P:methylation
Cflo_16729--XP_001602979.1_NASVI	61	kmr25_comp85531_c0_seq14	546	60	0.733	2.83341e-26	0.98	0.33	EFN72161	Cytochrome P450 4C1 [Camponotus floridanus]	5	F:GO:0005506; F:GO:0016705; P:GO:0055114; F:GO:0004497; F:GO:0020037	F:iron ion binding; F:oxidoreductase activity, acting on paired donors, with incorporation or reduction of molecular oxygen; P:oxidation-reduction process; F:monooxygenase activity; F:heme binding
Cflo_16833--NA	49	kmr25_comp82970_c1_seq1	394	48	0.75	4.3442e-21	0.98	0.37	EFN64378	hypothetical protein EAG_07261 [Camponotus floridanus]
Cflo_16887--NA	35	kmr23_comp65135_c0_seq1	2243	35	0.829	7.01617e-14	1	0.05	EFN65002	hypothetical protein EAG_00011 [Camponotus floridanus]
Cflo_16910--NA	43	kmr23_comp77761_c0_seq1	1377	43	0.721	1.03059e-11	1	0.09	AAC16609	transposase [Drosophila sechellia]
Cflo_16921--NA	30	kmr23_comp31136_c0_seq1	273	29	0.931	6.97494e-12	0.97	0.32	EFN75621	hypothetical protein EAI_06677 [Harpegnathos saltator]
Cflo_16967--NA	38	kmr23_comp68633_c5_seq1	720	38	0.737	1.2382e-11	1	0.16	#N/A	#N/A
Cflo_17027--NA	35	kmr25_comp78365_c1_seq2	259	34	0.706	5.10712e-11	0.97	0.4	EFN63938	hypothetical protein EAG_08369 [Camponotus floridanus]
Cflo_17046--NA	34	kmr23_comp80392_c0_seq1	393	34	0.706	3.16257e-07	1	0.27	EFN65356	hypothetical protein EAG_06564 [Camponotus floridanus]
Cflo_17050--NA	30	kmr23_comp70200_c0_seq1	606	30	0.733	8.99227e-09	1	0.15	EFN65835	hypothetical protein EAG_05269 [Camponotus floridanus]
Cfol_11093-3--XP_396825.2_APIME	363	kmr23_comp56219_c1_seq1	1472	361	0.873	0	0.99	0.74	EFN61811	Protein yellow [Camponotus floridanus]
