# Supplementary material for: Transcriptome sequencing reveals high isoform diversity in the ant Formica exsecta
Source: PeerJ. 2017 Nov 21;5:e3998. doi: 10.7717/peerj.3998 (PMC5701548; doi:10.7717/peerj.3998)
Supplement: File S5 [file peerj-05-3998-s005.xls]

## Sheet: File_S5
	Table S5_A. Singlet genes in the Unigene-TA Assembly.
	Transcripts Name	Length Of Transcripts	NCBI	Annotation	Species	Protein/Gene Name
	Ant-TAContig1658	22640	EFN84145	Ants	Harpegnathos saltator	Nesprin-1
	Ant-TAContig159	18482	EFN64029	Ants	Camponotus floridanus	Titin
	Ant-TAContig2381	14358	EGI63145	Ants	Acromyrmex echinatior	Apolipophorin
	Ant-TAContig89	12964	EFN68235	Ants	Camponotus floridanus	Adenomatous polyposis coli protein
	kmr27_comp90068_c0_seq1	12936	E2AUX1	Ants	Camponotus floridanus	Transformation/transcription domain-associated protein
	Ant-TAContig6799	12442	EFN69406	Ants	Camponotus floridanus	63 kDa sperm flagellar membrane protein
	kmr27_comp90537_c0_seq1	12169	E2B102	Ants	Camponotus floridanus	Putative uncharacterized protein
	kmr25_comp85173_c1_seq1	12053	EFN77430	Ants	Harpegnathos saltator	Dynein heavy chain, cytoplasmic
	Ant-TAContig244	11644	EFN74999	Ants	Camponotus floridanus	Vacuolar protein sorting-associated protein 13A
	kmr25_comp81594_c3_seq1	11331	E2A3M1	Ants	Camponotus floridanus	Putative uncharacterized protein
	Ant-TAContig5848	11314	EFN67724	Ants	Camponotus floridanus	CCR4-NOT transcription complex subunit 1
	Ant-TAContig4542	11256	EFN73041	Ants	Camponotus floridanus	hypothetical protein EAG_11334
	Ant-TAContig3090	10912	EFN68384	Ants	Camponotus floridanus	Histone-lysine N-methyltransferase trithorax
	Ant-TAContig7314	10862	EGI58975	Ants	Acromyrmex echinatior	Baculoviral IAP repeat-containing protein 6
	Ant-TAContig4835	10731	EFN61065	Ants	Camponotus floridanus	Laminin subunit alpha
	kmr29_comp96424_c0_seq1	10682	E2B055	Ants	Camponotus floridanus	Teneurin-3
	kmr23_comp79744_c0_seq1	10583	E2AFU7	Ants	Camponotus floridanus	Helicase ARIP4
	Ant-TAContig7519	9939	EFN65741	Ants	Camponotus floridanus	Lysosomal-trafficking regulator
	kmr25_comp84659_c2_seq1	9837	E1ZXT6	Ants	Camponotus floridanus	DnaJ-like protein subfamily C member 13
	kmr29_comp96809_c0_seq1	9824	E2AE28	Ants	Camponotus floridanus	Nucleome-remodeling factor subunit NURF301
	Ant-TAContig1725	9478	EFN64781	Ants	Camponotus floridanus	Dynein heavy chain 3, axonemal
	Ant-TAContig4836	9248	EFN72399	Ants	Camponotus floridanus	Ubiquitin carboxyl-terminal hydrolase 34
	kmr27_comp91723_c4_seq39	9051	EFN75044	Ants	Camponotus floridanus	Uncharacterized protein KIAA1109
	kmr25_comp85518_c8_seq1	9023	EGI58294	Ants	Acromyrmex echinatior	Telomere-associated protein RIF1
	Ant-TAContig4572	8656	EFN63219	Ants	Camponotus floridanus	Sortilin-related receptor
	kmr27_comp90597_c0_seq1	8561	E2AHT0	Ants	Camponotus floridanus	Neuron navigator 2
	kmr25_comp85940_c0_seq1	8501	E2A2V6	Ants	Camponotus floridanus	UPF0493 protein AAEL009648
	Ant-TAContig6495	8472	EFN63075	Ants	Camponotus floridanus	Uncharacterized protein KIAA0240
	Ant-TAContig11853	8469	EFN61414	Ants	Camponotus floridanus	Clathrin heavy chain
	Ant-TAContig293	8385	EGI65093	Ants	Acromyrmex echinatior	DE-cadherin
	kmr23_comp35124_c0_seq1	8340	F4W4E4	Ants	Acromyrmex echinatior	Aminopeptidase N
	kmr29_comp95833_c4_seq1	8294	E2B1R5	Ants	Camponotus floridanus	Zinc finger homeobox protein 3
	kmr27_comp91333_c5_seq1	8179	E1ZWJ3	Ants	Camponotus floridanus	Cadherin-related tumor suppressor
	Ant-TAContig179	8116	EFN65884	Ants	Camponotus floridanus	Pre-mRNA-processing-splicing factor 8
	Ant-TAContig447	8032	EFN68709	Ants	Camponotus floridanus	Laminin subunit beta-1
	Ant-TAContig218	7975	EFN68385	Ants	Camponotus floridanus	Putative transcription factor capicua
	kmr23_comp75843_c0_seq1	7957	EFN60318	Ants	Camponotus floridanus	Centromeric protein E
	Ant-TAContig7279	7893	EFN71076	Ants	Camponotus floridanus	Protein dachsous
	Ant-TAContig11866	7881	EFN67181	Ants	Camponotus floridanus	C-myc promoter-binding protein
	Ant-TAContig6483	7880	EFN63508	Ants	Camponotus floridanus	Low-density lipoprotein receptor-related protein 2
	kmr29_comp95045_c0_seq1	7880	EFN60815	Ants	Camponotus floridanus	Pecanex-like protein 1
	Ant-TAContig2909	7780	EGI69421	Ants	Acromyrmex echinatior	Calcineurin-binding protein cabin-1
	Ant-TAContig453	7777	EFN68400	Ants	Camponotus floridanus	Fatty acid synthase
	kmr27_comp90101_c0_seq1	7769	E2A7K7	Ants	Camponotus floridanus	Apolipophorins
	kmr27_comp89982_c1_seq1	7767	E2APL4	Ants	Camponotus floridanus	Collagen alpha-1(IV) chain
	Ant-TAContig9034	7703	EFN71360	Ants	Camponotus floridanus	Probable E3 ubiquitin-protein ligase MYCBP2
	kmr29_comp95402_c3_seq5	7620	EFZ09257	Ants	Solenopsis invicta	hypothetical protein SINV_09572
	Ant-TAContig238	7606	EFN70359	Ants	Camponotus floridanus	Rho-associated protein kinase 2
	kmr29_comp96858_c1_seq1	7595	EFN86893	Ants	Harpegnathos saltator	Host cell factor
	kmr27_comp91252_c0_seq1	7542	E1ZVK7	Ants	Camponotus floridanus	Inactive ubiquitin carboxyl-terminal hydrolase 54
	Ant-TAContig871	7522	EFZ21259	Ants	Solenopsis invicta	hypothetical protein SINV_04884
	kmr29_comp91124_c0_seq1	7496	E2C798	Ants	Harathos saltator	Mediator of RNA polymerase II transcription subunit 12
	kmr25_comp84951_c0_seq1	7386	E2AK37	Ants	Camponotus floridanus	Cubilin
	kmr31_comp2212_c0_seq1	7352	E2A5I5	Ants	Camponotus floridanus	WD repeat-containing protein 12
	kmr29_comp96440_c0_seq1	7341	E1ZXX0	Ants	Camponotus floridanus	Putative uncharacterized protein
	Ant-TAContig6319	7221	EFN61346	Ants	Camponotus floridanus	hypothetical protein EAG_02001
	Ant-TAContig6870	7182	EFN68861	Ants	Camponotus floridanus	Tetratricopeptide repeat protein 28
	Ant-TAContig128	7117	EFN66625	Ants	Camponotus floridanus	Baculoviral IAP repeat-containing protein 6
	kmr29_comp95194_c0_seq1	7114	E1ZZB0	Ants	Camponotus floridanus	Breakpoint cluster region protein
	kmr29_comp96838_c2_seq1	7107	EFN61994	Ants	Camponotus floridanus	Spectrin alpha chain
	Ant-TAContig3252	7082	EFN67962	Ants	Camponotus floridanus	Dipeptidyl aminopeptidase-like protein 6
	Ant-TAContig2619	7051	EFN68429	Ants	Camponotus floridanus	Plexin-B
	kmr27_comp86805_c0_seq1	6988	E2ARH2	Ants	Camponotus floridanus	E3 SUMO-protein ligase RanBP2
	Ant-TAContig5350	6885	EFN66101	Ants	Camponotus floridanus	Cat eye syndrome critical region protein 2
	Ant-TAContig4034	6864	EFN66315	Ants	Camponotus floridanus	AT-hook-containing transcription factor 1
	Ant-TAContig6701	6810	EFN60202	Ants	Camponotus floridanus	DNA polymerase alpha catalytic subunit
	Ant-TAContig133	6809	EFN69567	Ants	Camponotus floridanus	BTB/POZ domain-containing protein 8
	kmr27_comp89061_c1_seq2	6785	EFN71119	Ants	Camponotus floridanus	Genetic suppressor element 1
	Ant-TAContig4748	6780	EFN70894	Ants	Camponotus floridanus	Putative U5 small nuclear ribonucleoprotein 200 kDa helicase
	kmr29_comp96732_c0_seq1	6717	F4WZV3	Ants	Acromyrmex echinatior	Golgin subfamily A member 4
	Ant-TAContig6698	6717	EFN65693	Ants	Camponotus floridanus	Protocadherin-15
	Ant-TAContig1903	6688	EFN72705	Ants	Camponotus floridanus	Glutamine and serine-rich protein 1
	kmr23_comp75782_c0_seq1	6588	E2A9C9	Ants	Camponotus floridanus	Signal-induced proliferation-associated 1-like protein 1
	kmr23_comp72278_c0_seq1	6587	EFN70095	Ants	Camponotus floridanus	Protein virilizer
	Ant-TAContig59	6539	EFN67280	Ants	Camponotus floridanus	Semaphorin-1A
	kmr25_comp85220_c0_seq1	6511	F4X0Y7	Ants	Acromyrmex echinatior	Zinc finger protein 235
	Ant-TAContig4842	6502	EFN70867	Ants	Camponotus floridanus	Disks large-like protein 5
	kmr27_comp91294_c0_seq2	6463	EFN79431	Ants	Harpegnathos saltator	Tyrosine-protein kinase-like 7
	kmr23_comp77369_c0_seq1	6426	EFN67414	Ants	Camponotus floridanus	DNA polymerase epsilon catalytic subunit A
	kmr23_comp77183_c0_seq1	6413	E2ADY4	Ants	Camponotus floridanus	Serine protease nudel
	kmr29_comp94512_c0_seq1	6395	EGI57305	Ants	Acromyrmex echinatior	Histone-lysine N-methyltransferase SETD1B
	Ant-TAContig352	6371	EFN72933	Ants	Camponotus floridanus	Tyrosine-protein phosphatase non-receptor type 23
	kmr31_comp2845_c3_seq1	6356	E2B282	Ants	Camponotus floridanus	Polyadenylate-binding protein 1
	Ant-TAContig4414	6352	EFN65152	Ants	Camponotus floridanus	Cordon-bleu protein-like 1
	Ant-TAContig4324	6352	EFZ20086	Ants	Solenopsis invicta	hypothetical protein SINV_04665
	kmr23_comp77354_c0_seq1	6327	EGI60690	Ants	Acromyrmex echinatior	Dedicator of cytokinesis protein 7
	Ant-TAContig2174	6323	EFN64191	Ants	Camponotus floridanus	HEAT repeat-containing protein 1
	Ant-TAContig4002	6320	EFN75051	Ants	Camponotus floridanus	Nuclear pore complex protein Nup98-Nup96
	Ant-TAContig472	6307	EFN88101	Ants	Harpegnathos saltator	Serine/threonine-protein phosphatase 1 regulatory subunit 10
	kmr23_comp75474_c0_seq1	6291	EFN68416	Ants	Camponotus floridanus	Neurofibromin
	kmr25_comp84120_c0_seq1	6291	E9IEB7	Ants	Solenopsis invicta	Putative uncharacterized protein (Fragment)
	kmr27_comp90362_c3_seq1	6272	E2AMR7	Ants	Camponotus floridanus	Uncharacterized protein KIAA1267
	kmr25_comp83683_c0_seq1	6258	E2BHX6	Ants	Harathos saltator	Uncharacterized protein KIAA0562
	kmr29_comp96739_c4_seq1	6230	E9IL54	Ants	Solenopsis invicta	Putative uncharacterized protein (Fragment)
	Ant-TAContig387	6218	EFN64929	Ants	Camponotus floridanus	Protein Jumonji
	kmr27_comp91801_c0_seq1	6211	E2ANT6	Ants	Camponotus floridanus	Zinc finger SWIM domain-containing protein KIAA0913
	kmr25_comp83924_c0_seq1	6196	E1ZYB9	Ants	Camponotus floridanus	Putative DNA helicase Ino80
	kmr27_comp90481_c0_seq1	6143	EFN69662	Ants	Camponotus floridanus	Fibrillin-2
	kmr23_comp72625_c0_seq1	6133	E1ZVD2	Ants	Camponotus floridanus	Putative uncharacterized protein
	Ant-TAContig3824	6129	EFN73613	Ants	Camponotus floridanus	Ankyrin repeat and sterile alpha motif domain-containing protein 1B
	kmr27_comp88977_c1_seq1	6078	E2AZ34	Ants	Camponotus floridanus	Protein purity of essence
	Ant-TAContig2531	6058	EFN61981	Ants	Camponotus floridanus	Nuclear pore membrane glycoprotein 210
	kmr27_comp91435_c1_seq1	6057	E2A0Y3	Ants	Camponotus floridanus	Telomerase-binding protein EST1A
	kmr27_comp91015_c1_seq1	6046	E2AX71	Ants	Camponotus floridanus	FKBP12-rapamycin complex-associated protein
	kmr23_comp33788_c0_seq1	6046	EFN70096	Ants	Camponotus floridanus	Nucleolar pre-ribosomal-associated protein 1
	kmr29_comp93925_c0_seq1	6029	E2A088	Ants	Camponotus floridanus	3-phphoinitide-dependent protein kinase 1
	kmr27_comp91126_c0_seq1	6012	EFN87710	Ants	Harpegnathos saltator	Proteasome activator complex subunit 4
	kmr29_comp92725_c0_seq1	5996	EFN64703	Ants	Camponotus floridanus	Serine/threonine-protein kinase MRCK beta
	kmr27_comp87793_c0_seq1	5980	E2ABF8	Ants	Camponotus floridanus	MOG interacting and ectopic P-granules protein 1
	Ant-TAContig1867	5930	EFN66537	Ants	Camponotus floridanus	hypothetical protein EAG_11031
	kmr25_comp84840_c0_seq1	5925	E2ADU0	Ants	Camponotus floridanus	A-kinase anchor protein 13
	kmr29_comp95054_c2_seq1	5923	E1ZYI6	Ants	Camponotus floridanus	Polycomb group protein Psc
	kmr25_comp84622_c0_seq1	5910	E2AC10	Ants	Camponotus floridanus	DNA-directed RNA polymerase
	Ant-TAContig5983	5873	EFN65526	Ants	Camponotus floridanus	Receptor-type tyrosine-protein phosphatase N2
	kmr29_comp96136_c0_seq2	5862	EFN73891	Ants	Camponotus floridanus	Ephrin-B1
	kmr29_comp93398_c1_seq1	5856	E2A445	Ants	Camponotus floridanus	Amyloid beta A4 protein-binding family B member 2
	Ant-TAContig297	5846	EFN66379	Ants	Camponotus floridanus	Rho/Cdc42/Rac GTPase-activating protein RICS
	Ant-TAContig524	5819	EFN60232	Ants	Camponotus floridanus	Cyclin-T
	kmr25_comp85390_c0_seq2	5817	EFN70589	Ants	Camponotus floridanus	Microsomal triglyceride transfer protein large subunit
	kmr25_comp84965_c0_seq1	5813	E2AFB1	Ants	Camponotus floridanus	Putative uncharacterized protein
	Ant-TAContig4704	5801	EFN69775	Ants	Camponotus floridanus	hypothetical protein EAG_08827
	kmr27_comp89620_c1_seq2	5794	E2A213	Ants	Camponotus floridanus	Axin-1
	kmr23_comp72406_c0_seq1	5775	E2BJR2	Ants	Harathos saltator	Putative uncharacterized protein
	Ant-TAContig2605	5773	EFN63116	Ants	Camponotus floridanus	tRNA-dihydrouridine synthase 3-like
	kmr29_comp96453_c10_seq1	5756	E9IYI3	Ants	Solenopsis invicta	Putative uncharacterized protein (Fragment)
	Ant-TAContig1798	5756	EFN67837	Ants	Camponotus floridanus	RNA-binding protein 12
	Ant-TAContig26	5747	EFN68333	Ants	Camponotus floridanus	Pancreatic lipase-related protein 2
	Ant-TAContig4206	5742	EFN74574	Ants	Camponotus floridanus	Leukocyte common antigen
	Ant-TAContig1524	5715	EFN64578	Ants	Camponotus floridanus	Helicase sen1
	kmr23_comp69955_c6_seq1	5708	E2AII8	Ants	Camponotus floridanus	Supporter of activation of yellow protein
	kmr29_comp92172_c0_seq1	5696	E2AYB0	Ants	Camponotus floridanus	Vigilin
	Ant-TAContig3335	5693	EFZ14490	Ants	Solenopsis invicta	hypothetical protein SINV_08491
	kmr23_comp53255_c0_seq1	5688	EFN74386	Ants	Camponotus floridanus	Midasin
	Ant-TAContig4066	5681	EFN63864	Ants	Camponotus floridanus	Interleukin-16
	Ant-TAContig3249	5679	EFN71615	Ants	Camponotus floridanus	ATP-binding cassette sub-family A member 3
	kmr23_comp34774_c0_seq1	5662	EGI63326	Ants	Acromyrmex echinatior	Tuberin
	kmr31_comp2769_c1_seq1	5657	E2AY69	Ants	Camponotus floridanus	Heat shock 70 kDa protein cognate 3
	Ant-TAContig1048	5637	EFN66162	Ants	Camponotus floridanus	hypothetical protein EAG_13618
	Ant-TAContig601	5628	EFN71450	Ants	Camponotus floridanus	Methionine aminopeptidase 2
	kmr29_comp94234_c0_seq1	5626	E2AEB2	Ants	Camponotus floridanus	Brain tumor protein
	Ant-TAContig4436	5612	EFN72390	Ants	Camponotus floridanus	Probable JmjC domain-containing histone demethylation protein 3B
	Ant-TAContig458	5581	EFN61718	Ants	Camponotus floridanus	Nuclear receptor coactivator 6
	Ant-TAContig6793	5580	EFN71072	Ants	Camponotus floridanus	Zinc finger protein 687
	kmr23_comp69085_c4_seq1	5573	EFN73683	Ants	Camponotus floridanus	Activating molecule in BECN1-regulated autophagy protein 1
	Ant-TAContig2717	5572	EFN60962	Ants	Camponotus floridanus	Monocarboxylate transporter 12
	Ant-TAContig4951	5546	EFN62743	Ants	Camponotus floridanus	Innexin inx3
	Ant-TAContig7044	5544	EFN61424	Ants	Camponotus floridanus	Long-chain-fatty-acid--CoA ligase 3
	kmr25_comp84584_c2_seq1	5529	E2AIQ4	Ants	Camponotus floridanus	G protein-coupled receptor kinase 2
	kmr23_comp76120_c0_seq1	5528	EFN64691	Ants	Camponotus floridanus	Polycomb complex protein BMI-1
	kmr29_comp90370_c0_seq1	5449	E2ADN9	Ants	Camponotus floridanus	Citron Rho-interacting kinase
	Ant-TAContig923	5442	EFN64027	Ants	Camponotus floridanus	Myosin light chain kinase, smooth muscle
	kmr29_comp96658_c1_seq1	5408	E2C353	Ants	Harathos saltator	Interferon regulatory factor 2-binding protein 2-A (Fragment)
	kmr23_comp69450_c13_seq1	5405	EFZ19500	Ants	Solenopsis invicta	hypothetical protein SINV_15044
	Ant-TAContig483	5404	EFN67394	Ants	Camponotus floridanus	TBC1 domain family member 1
	Ant-TAContig123	5393	EFN82670	Ants	Harpegnathos saltator	Laminin subunit gamma-1
	kmr23_comp71382_c0_seq1	5389	E9IME8	Ants	Solenopsis invicta	Putative uncharacterized protein (Fragment)
	kmr31_comp1206_c0_seq1	5373	E9IR97	Ants	Solenopsis invicta	Putative uncharacterized protein (Fragment)
	Ant-TAContig4954	5370	EFN70441	Ants	Camponotus floridanus	VPRBP-like protein
	kmr29_comp90438_c0_seq1	5369	E2BXZ6	Ants	Harathos saltator	Semaphorin-1A
	kmr29_comp94747_c2_seq1	5367	E2AWB4	Ants	Camponotus floridanus	Ubinuclein
	kmr29_comp94429_c3_seq1	5330	E1ZY71	Ants	Camponotus floridanus	Putative uncharacterized protein
	Ant-TAContig436	5321	EFN67176	Ants	Camponotus floridanus	Bifunctional aminoacyl-tRNA synthetase
	Ant-TAContig5584	5308	EFN71801	Ants	Camponotus floridanus	Probable phospholipid-transporting ATPase IA
	kmr23_comp72656_c0_seq1	5307	E2AM62	Ants	Camponotus floridanus	Dipeptidyl peptidase 9
	Ant-TAContig4944	5284	EFN66872	Ants	Camponotus floridanus	Asparaginyl-tRNA synthetase, cytoplasmic
	Ant-TAContig4438	5276	EFN73645	Ants	Camponotus floridanus	CD109 antigen
	kmr25_comp84556_c1_seq1	5275	E2AJ51	Ants	Camponotus floridanus	Zinc finger CCHC domain-containing protein 2
	Ant-TAContig1125	5263	EFN63248	Ants	Camponotus floridanus	Putative RNA-binding protein 16
	kmr23_comp51390_c0_seq1	5252	EFN61960	Ants	Camponotus floridanus	Probable chitinase 1
	Ant-TAContig328	5249	EFN70282	Ants	Camponotus floridanus	Nuclear factor related to kappa-B-binding protein
	Ant-TAContig333	5243	EFN63857	Ants	Camponotus floridanus	Zinc finger protein jing-like protein
	kmr27_comp87484_c0_seq1	5224	E2AHJ8	Ants	Camponotus floridanus	Cullin-associated NEDD8-dissociated protein 1
	Ant-TAContig1672	5218	EFN70885	Ants	Camponotus floridanus	FYVE finger-containing phosphoinositide kinase
	Ant-TAContig5048	5217	EFN68910	Ants	Camponotus floridanus	Protogenin
	Ant-TAContig4733	5216	EGI58311	Ants	Acromyrmex echinatior	HEAT repeat-containing protein 7A
	kmr23_comp73251_c0_seq1	5198	EFN76367	Ants	Harpegnathos saltator	DNA (cytosine-5)-methyltransferase 1
	Ant-TAContig11822	5168	EFN60585	Ants	Camponotus floridanus	Probable glutaminyl-tRNA synthetase
	kmr25_comp83343_c0_seq1	5162	EFN72338	Ants	Camponotus floridanus	Maternal protein pumilio
	Ant-TAContig2568	5146	EFN70928	Ants	Camponotus floridanus	PDZ domain-containing protein 2
	kmr23_comp67515_c0_seq1	5130	E2B9C4	Ants	Harathos saltator	ATP-dependent DNA helicase Q5
	kmr29_comp93289_c0_seq1	5122	E1ZXK3	Ants	Camponotus floridanus	Centromal protein of 152 kDa
	Ant-TAContig4583	5106	EFN66973	Ants	Camponotus floridanus	Tyrosine-protein phosphatase 69D
	kmr29_comp90515_c2_seq1	5095	E2AW97	Ants	Camponotus floridanus	Myotubularin-related protein 3
	Ant-TAContig1520	5089	EFN64497	Ants	Camponotus floridanus	hypothetical protein EAG_01835
	Ant-TAContig3105	5084	EFN66382	Ants	Camponotus floridanus	Phosphatidylinositol-4,5-bisphosphate 3-kinase catalytic subunit beta isoform
	kmr29_comp93544_c0_seq3	5080	E2AUM0	Ants	Camponotus floridanus	CLIP-associating protein
	kmr23_comp72352_c0_seq1	5077	EFN73828	Ants	Camponotus floridanus	Protein shuttle craft
	kmr25_comp83630_c1_seq1	5068	E2ATS4	Ants	Camponotus floridanus	Pleckstrin-like proteiny domain-containing family G member 1
	Ant-TAContig81	5051	EFN74213	Ants	Camponotus floridanus	hypothetical protein EAG_14125
	Ant-TAContig4921	5011	EFN62857	Ants	Camponotus floridanus	Protein QN1-like protein
	kmr25_comp80933_c0_seq2	5010	EFN67980	Ants	Camponotus floridanus	Anaphase-promoting complex subunit 1
	kmr27_comp88551_c0_seq1	4998	E2AE41	Ants	Camponotus floridanus	Structural maintenance of chromomes protein
	kmr23_comp68365_c0_seq1	4996	EFN73985	Ants	Camponotus floridanus	PAB-dependent poly(A)-specific ribonuclease subunit 2
	kmr29_comp96806_c2_seq1	4982	E2ARI2	Ants	Camponotus floridanus	Putative uncharacterized protein
	kmr29_comp96137_c1_seq2	4956	E2AM73	Ants	Camponotus floridanus	Sodium/potassium/calcium exchanger 4
	Ant-TAContig7261	4929	EFN64276	Ants	Camponotus floridanus	Sorting nexin-27
	kmr29_comp93948_c0_seq1	4876	E2AF03	Ants	Camponotus floridanus	RB1-inducible coiled-coil protein 1
	kmr27_comp89941_c0_seq1	4875	E2AUU9	Ants	Camponotus floridanus	Ubiquitin carboxyl-terminal hydrolase
	kmr23_comp71239_c0_seq1	4858	EGI66828	Ants	Acromyrmex echinatior	hypothetical protein G5I_04634
	kmr23_comp72405_c0_seq1	4831	EFN67441	Ants	Camponotus floridanus	hypothetical protein EAG_01769
	Ant-TAContig4074	4826	EFN87520	Ants	Harpegnathos saltator	Nose resistant to fluoxetine protein 6
	Ant-TAContig3925	4825	EFN86815	Ants	Harpegnathos saltator	Cell division cycle protein 27-like protein
	kmr23_comp33236_c1_seq1	4825	EFN63508	Ants	Camponotus floridanus	Low-density lipoprotein receptor-related protein 2
	Ant-TAContig391	4822	EFN80218	Ants	Harpegnathos saltator	63 kDa sperm flagellar membrane protein
	Ant-TAContig3467	4809	EFN69845	Ants	Camponotus floridanus	Vitellogenin (Vg-like Protein A)
	kmr23_comp60141_c0_seq1	4776	EFN70306	Ants	Camponotus floridanus	Cullin-1
	kmr29_comp91969_c0_seq1	4770	E1ZWV4	Ants	Camponotus floridanus	Transmembrane protein 77
	kmr25_comp85497_c1_seq1	4763	E2A5P3	Ants	Camponotus floridanus	FK506-binding protein 15
	Ant-TAContig6447	4759	EFN64670	Ants	Camponotus floridanus	Rho GTPase-activating protein 20
	kmr31_comp2098_c0_seq1	4752	E2A3K4	Ants	Camponotus floridanus	Tribbles-like protein 2
	kmr31_comp3941_c0_seq1	4752	E2A1Y1	Ants	Camponotus floridanus	Vacuolar protein sorting-associating protein 4A
	kmr23_comp72962_c0_seq1	4751	EFN68153	Ants	Camponotus floridanus	Cytoplasmic FMR1-interacting protein
	kmr31_comp2264_c0_seq1	4746	F4W4K8	Ants	Acromyrmex echinatior	Protein daughterless
	kmr25_comp82165_c0_seq1	4736	E2A530	Ants	Camponotus floridanus	Tyrine-protein kinase receptor
	Ant-TAContig3255	4733	EFN71887	Ants	Camponotus floridanus	Low-density lipoprotein receptor-related protein 6
	kmr23_comp73250_c0_seq1	4728	EFN71060	Ants	Camponotus floridanus	DNA polymerase subunit gamma-1, mitochondrial
	Ant-TAContig7246	4721	EFN61814	Ants	Camponotus floridanus	Protein tweety
	Ant-TAContig145	4720	EFN66327	Ants	Camponotus floridanus	Coronin-7
	kmr25_comp85470_c0_seq1	4713	E2AI20	Ants	Camponotus floridanus	Anion exchange protein 2
	kmr23_comp70782_c0_seq1	4709	EFN74891	Ants	Camponotus floridanus	Nucleolar protein 11
	kmr25_comp80982_c0_seq1	4708	EFN67330	Ants	Camponotus floridanus	Spatacsin
	Ant-TAContig3644	4703	EFN73120	Ants	Camponotus floridanus	Probable cation-transporting ATPase 13A1
	kmr23_comp33695_c0_seq1	4696	E9IH68	Ants	Solenopsis invicta	Putative uncharacterized protein (Fragment)
	kmr29_comp87092_c0_seq1	4690	E1ZZM3	Ants	Camponotus floridanus	Mitogen-activated protein kinase 1
	Ant-TAContig11854	4689	EFN69572	Ants	Camponotus floridanus	Serine/threonine-protein phosphatase alpha-1 isoform
	kmr27_comp90176_c2_seq1	4689	E2ATW8	Ants	Camponotus floridanus	Zinc finger protein 521 (Fragment)
	kmr25_comp84686_c3_seq1	4686	E9IP01	Ants	Solenopsis invicta	Putative uncharacterized protein (Fragment)
	kmr29_comp96831_c4_seq5	4678	E9IIL2	Ants	Solenopsis invicta	Putative uncharacterized protein (Fragment)
	kmr27_comp91189_c0_seq22	4663	EGI68830	Ants	Acromyrmex echinatior	Putative histone-lysine N-methyltransferase NSD2
	kmr29_comp95970_c14_seq1	4663	E9IW77	Ants	Solenopsis invicta	Putative uncharacterized protein (Fragment)
	kmr29_comp96011_c0_seq1	4652	E2ATM1	Ants	Camponotus floridanus	Putative uncharacterized protein
	Ant-TAContig6	4652	EFN81930	Ants	Harpegnathos saltator	RING finger protein 17
	Ant-TAContig11876	4648	EFN71530	Ants	Camponotus floridanus	Ubiquitin-protein ligase E3B
	kmr23_comp34818_c0_seq1	4637	EGI67465	Ants	Acromyrmex echinatior	GON-4-like protein
	Ant-TAContig1049	4617	EFN70579	Ants	Camponotus floridanus	Apolipophorins
	kmr27_comp89518_c0_seq1	4614	E9JBY7	Ants	Solenopsis invicta	Putative uncharacterized protein (Fragment)
	kmr27_comp90098_c1_seq1	4607	E2A3I3	Ants	Camponotus floridanus	Lipin-2
	kmr31_comp6275_c0_seq1	4598	E2ACC5	Ants	Camponotus floridanus	Integrator complex subunit 6-A
	kmr27_comp88689_c0_seq1	4596	E1ZY71	Ants	Camponotus floridanus	Putative uncharacterized protein
	Ant-TAContig3418	4589	EGI63716	Ants	Acromyrmex echinatior	ATPase family AAA domain-containing protein 2
	kmr29_comp96005_c0_seq1	4577	E2ART7	Ants	Camponotus floridanus	Probable phpholipid-transporting ATPase VA
	kmr27_comp91190_c0_seq2	4572	EFN70191	Ants	Camponotus floridanus	Ring finger and transmembrane domain-containing protein 2
	Ant-TAContig4533	4570	EFN68923	Ants	Camponotus floridanus	Anaphase-promoting complex subunit 2
	kmr27_comp87040_c1_seq1	4564	E2AMH0	Ants	Camponotus floridanus	Peroxisome proliferator-activated receptor gamma coactivator-related protein 1
	kmr25_comp78536_c0_seq1	4554	E2AH09	Ants	Camponotus floridanus	Transcription factor E2F2
	Ant-TAContig4890	4547	EFN73237	Ants	Camponotus floridanus	Diacylglycerol kinase delta
	Ant-TAContig7348	4545	EFN63513	Ants	Camponotus floridanus	Myosin-XV
	Ant-TAContig5239	4539	EFN83355	Ants	Harpegnathos saltator	5'-3' exoribonuclease 2-like protein
	kmr23_comp69848_c0_seq1	4533	E1ZZS1	Ants	Camponotus floridanus	Protocadherin-like wing polarity protein stan
	kmr23_comp75689_c0_seq1	4521	EFN74162	Ants	Camponotus floridanus	hypothetical protein EAG_14074
	kmr23_comp74046_c0_seq1	4519	EFN72678	Ants	Camponotus floridanus	E3 ubiquitin-protein ligase suppressor of deltex
	Ant-TAContig6904	4513	EFN72395	Ants	Camponotus floridanus	Exocyst complex component 5
	kmr23_comp75869_c0_seq1	4508	EFN65817	Ants	Camponotus floridanus	Zinc finger X-linked protein ZXDB
	Ant-TAContig1177	4496	EFN73286	Ants	Camponotus floridanus	hypothetical protein EAG_16365
	kmr23_comp33700_c1_seq1	4494	EFN64710	Ants	Camponotus floridanus	Mediator of RNA polymerase II transcription subunit 23
	kmr23_comp70080_c30_seq1	4482	EFN70082	Ants	Camponotus floridanus	Nucleoprotein TPR
	kmr29_comp85953_c0_seq1	4474	E2C106	Ants	Harathos saltator	Transcription initiation factor TFIID subunit 4
	kmr27_comp89690_c3_seq11	4465	EFN70079	Ants	Camponotus floridanus	Neurabin-1
	kmr23_comp72027_c0_seq1	4463	EFN71599	Ants	Camponotus floridanus	Protein FAM44A
	Ant-TAContig5731	4458	EFN65868	Ants	Camponotus floridanus	Fanconi anemia group M protein
	kmr31_comp1902_c0_seq1	4450	E1ZZS9	Ants	Camponotus floridanus	GTP-binding protein ARD-1
	Ant-TAContig2689	4440	EFN69246	Ants	Camponotus floridanus	Neurotrypsin
	kmr25_comp82086_c0_seq1	4438	EFN74887	Ants	Camponotus floridanus	TATA element modulatory factor
	Ant-TAContig1002	4434	EFZ09194	Ants	Solenopsis invicta	hypothetical protein SINV_04956
	kmr27_comp89928_c0_seq1	4425	EFN67497	Ants	Camponotus floridanus	Probable E3 ubiquitin-protein ligase HERC4
	kmr29_comp96578_c2_seq1	4419	EFN85258	Ants	Harpegnathos saltator	Cryptochrome-1
	Ant-TAContig5241	4409	EFN69688	Ants	Camponotus floridanus	Homeotic protein female sterile
	kmr23_comp75521_c0_seq1	4395	EFN71661	Ants	Camponotus floridanus	Regulatory factor X domain-containing protein 2
	Ant-TAContig3928	4383	EFN66532	Ants	Camponotus floridanus	F-box only protein 33
	Ant-TAContig10349	4380	EFN70257	Ants	Camponotus floridanus	hypothetical protein EAG_11925
	kmr23_comp34577_c1_seq1	4350	EFN70324	Ants	Camponotus floridanus	Transmembrane protein 214-A
	Ant-TAContig277	4344	EFN79251	Ants	Harpegnathos saltator	NF-kappa-B inhibitor zeta
	kmr23_comp78789_c0_seq1	4334	EFN60525	Ants	Camponotus floridanus	Pre-mRNA 3'-end-processing factor FIP1
	kmr23_comp68854_c6_seq1	4331	EFN65722	Ants	Camponotus floridanus	Structural maintenance of chromosomes protein 6
	kmr25_comp84828_c6_seq1	4326	E2ACD4	Ants	Camponotus floridanus	Putative uncharacterized protein
	kmr23_comp73714_c0_seq1	4321	EFN83215	Ants	Harpegnathos saltator	AP-3 complex subunit delta-1
	Ant-TAContig2324	4316	EFN73133	Ants	Camponotus floridanus	Protein transport protein Sec24B
	kmr27_comp84831_c0_seq1	4306	EFN63229	Ants	Camponotus floridanus	Putative ATP-dependent RNA helicase DHX57
	kmr27_comp85557_c0_seq1	4306	E2AJZ4	Ants	Camponotus floridanus	Roundabout-like protein 2
	kmr23_comp72864_c0_seq1	4302	E9IZA5	Ants	Solenopsis invicta	Putative uncharacterized protein (Fragment)
	kmr29_comp90133_c0_seq1	4277	EFN66624	Ants	Camponotus floridanus	Blastoderm-specific protein 25D
	Ant-TAContig3663	4273	EFN66094	Ants	Camponotus floridanus	DOMON domain-containing protein CG14681
	Ant-TAContig1284	4265	EFN62214	Ants	Camponotus floridanus	6PF-2-K/Fru-2,6-P2ASE liver/muscle isozymes
	Ant-TAContig3103	4260	EFN69613	Ants	Camponotus floridanus	Fanconi anemia group I protein-like protein
	Ant-TAContig3188	4256	EFN71690	Ants	Camponotus floridanus	Ets DNA-binding protein pokkuri
	Ant-TAContig1674	4246	EFN62163	Ants	Camponotus floridanus	Eukaryotic translation initiation factor 2C 2
	Ant-TAContig824	4231	EFN70015	Ants	Camponotus floridanus	hypothetical protein EAG_14696
	Ant-TAContig3174	4228	EFN60939	Ants	Camponotus floridanus	DNA polymerase delta catalytic subunit
	kmr23_comp53755_c2_seq1	4226	EFN64480	Ants	Camponotus floridanus	hypothetical protein EAG_01817
	kmr23_comp72293_c0_seq1	4218	EFN70167	Ants	Camponotus floridanus	La-related protein
	kmr27_comp90196_c3_seq1	4217	F4W616	Ants	Acromyrmex echinatior	Uncharacterized protein KIAA1467-like protein
	kmr25_comp83547_c0_seq1	4216	E2AAK3	Ants	Camponotus floridanus	Protein FAM48A
	kmr23_comp67481_c2_seq1	4212	E9IBC4	Ants	Solenopsis invicta	Putative uncharacterized protein (Fragment)
	kmr27_comp89937_c1_seq1	4210	E9J3B6	Ants	Solenopsis invicta	Putative uncharacterized protein (Fragment)
	kmr23_comp78569_c0_seq1	4205	EFN74494	Ants	Camponotus floridanus	RING finger protein 168
	kmr23_comp69418_c1_seq1	4204	E1ZW98	Ants	Camponotus floridanus	ATP-dependent RNA helicase DDX42
	kmr25_comp84309_c1_seq1	4203	EFN69246	Ants	Camponotus floridanus	Neurotrypsin
	Ant-TAContig8720	4182	EFN85810	Ants	Harpegnathos saltator	Atrial natriuretic peptide receptor A
	kmr25_comp38657_c0_seq1	4174	F4WNN3	Ants	Acromyrmex echinatior	Centromere protein J
	kmr27_comp90289_c0_seq1	4174	E2AMN0	Ants	Camponotus floridanus	Pancreatic lipase-related protein 1
	kmr23_comp68310_c3_seq1	4174	EFN62059	Ants	Camponotus floridanus	Protein CLEC16A
	kmr31_comp2386_c0_seq1	4164	F4WQM7	Ants	Acromyrmex echinatior	Sugar transporter ERD6-like 6 (Fragment)
	Ant-TAContig5749	4163	EFN66639	Ants	Camponotus floridanus	hypothetical protein EAG_15674
	kmr27_comp89517_c3_seq1	4161	EFN68522	Ants	Camponotus floridanus	Serine proteinase stubble
	Ant-TAContig3927	4154	EFN67436	Ants	Camponotus floridanus	Protein decapentaplegic
	kmr29_comp95022_c2_seq1	4143	E2AQU9	Ants	Camponotus floridanus	UDP-N-acetylglucamine--peptide N-acetylglucaminyltransferase 110 kDa subunit
	Ant-TAContig139	4138	EFN60261	Ants	Camponotus floridanus	Tyrosine kinase receptor Cad96Ca
	Ant-TAContig341	4123	EFN68114	Ants	Camponotus floridanus	Cuticlin-1
	kmr25_comp83901_c0_seq1	4120	E2AIV8	Ants	Camponotus floridanus	Autophagy-related protein 9A
	Ant-TAContig8506	4115	EFN62277	Ants	Camponotus floridanus	tRNA 2-thiocytidine biosynthesis protein ttcA
	Ant-TAContig249	4113	EFN62890	Ants	Camponotus floridanus	Enhancer of polycomb-like protein 1
	kmr25_comp84874_c0_seq1	4109	EFN61913	Ants	Camponotus floridanus	Centrosomal protein of 290 kDa
	Ant-TAContig143	4098	EFN72257	Ants	Camponotus floridanus	WD repeat, SAM and U-box domain-containing protein 1
	kmr23_comp33846_c0_seq1	4077	EFN65077	Ants	Camponotus floridanus	ER degradation-enhancing alpha-mannosidase-like 2
	Ant-TAContig1108	4076	EFN67482	Ants	Camponotus floridanus	Ras GTPase-activating protein-binding protein 2
	Ant-TAContig5067	4069	EFN74401	Ants	Camponotus floridanus	Adenylate cyclase type 2
	Ant-TAContig2739	4068	EGI64695	Ants	Acromyrmex echinatior	Myelin gene regulatory factor
	Ant-TAContig4992	4066	EFN62406	Ants	Camponotus floridanus	E3 ubiquitin-protein ligase UHRF2
	kmr27_comp90954_c5_seq3	4056	EFN80190	Ants	Harpegnathos saltator	Abhydrolase domain-containing protein FAM108B1
	kmr23_comp54983_c0_seq1	4055	EFN63311	Ants	Camponotus floridanus	hypothetical protein EAG_03158
	Ant-TAContig3142	4050	EFN65901	Ants	Camponotus floridanus	DNA-repair protein complementing XP-G cells
	kmr23_comp68664_c6_seq1	4047	EFN72017	Ants	Camponotus floridanus	Staphylococcal nuclease domain-containing protein 1
	kmr23_comp74240_c0_seq1	4042	EFN61372	Ants	Camponotus floridanus	hypothetical protein EAG_06707
	kmr27_comp89888_c2_seq1	4028	E2C5M6	Ants	Harathos saltator	Dipeptidyl peptidase 4
	Ant-TAContig1834	4025	EFN65120	Ants	Camponotus floridanus	Dynein heavy chain 10, axonemal
	Ant-TAContig11090	4025	EFN73486	Ants	Camponotus floridanus	Otopetrin-2
	kmr27_comp89227_c0_seq1	4024	EFN67200	Ants	Camponotus floridanus	Phosphoinositide 3-kinase adapter protein 1
	kmr29_comp93990_c1_seq1	4021	EFN69385	Ants	Camponotus floridanus	RNA exonuclease 1-like protein
	kmr23_comp69635_c8_seq1	4020	EFN75044	Ants	Camponotus floridanus	Uncharacterized protein KIAA1109
	kmr23_comp70479_c0_seq1	4019	F4WNR0	Ants	Acromyrmex echinatior	Putative uncharacterized protein
	Ant-TAContig3233	4019	EFN71210	Ants	Camponotus floridanus	Transcription elongation factor SPT5
	kmr29_comp91438_c1_seq1	4011	E1ZX10	Ants	Camponotus floridanus	Transcription factor Sp4 (Fragment)
	Ant-TAContig4046	4006	EFN60246	Ants	Camponotus floridanus	Protein slit
	kmr23_comp51411_c2_seq1	4006	EFN61462	Ants	Camponotus floridanus	Serine/threonine-protein kinase ATR
	kmr31_comp2861_c5_seq1	3999	E2C718	Ants	Harathos saltator	Putative aminopeptidase W07G4.4
	Ant-TAContig14	3996	EFZ13859	Ants	Solenopsis invicta	hypothetical protein SINV_12999
	kmr27_comp87475_c0_seq1	3988	E2AF17	Ants	Camponotus floridanus	Uncharacterized protein C10orf118
	Ant-TAContig1269	3986	EFN66634	Ants	Camponotus floridanus	D-3-phosphoglycerate dehydrogenase
	Ant-TAContig1250	3973	EFN63608	Ants	Camponotus floridanus	Probable DNA mismatch repair protein Msh6
	kmr25_comp67504_c0_seq1	3971	E1ZZH2	Ants	Camponotus floridanus	Cell division cycle and apoptis regulator protein 1
	Ant-TAContig5216	3966	EFN72039	Ants	Camponotus floridanus	Tyrosine-protein kinase Abl
	kmr25_comp83323_c0_seq1	3959	EFN72679	Ants	Camponotus floridanus	Connector enhancer of kinase suppressor of ras 3
	Ant-TAContig1385	3959	EFN69084	Ants	Camponotus floridanus	hypothetical protein EAG_02847
	kmr23_comp34679_c0_seq1	3958	EFN69109	Ants	Camponotus floridanus	Structural maintenance of chromosomes protein 1A
	kmr27_comp89769_c1_seq1	3951	E2AE96	Ants	Camponotus floridanus	Ankyrin-2
	kmr23_comp41006_c0_seq1	3939	EFN72945	Ants	Camponotus floridanus	Trafficking protein particle complex subunit 10
	kmr23_comp73475_c0_seq1	3932	EFN71265	Ants	Camponotus floridanus	Puromycin-sensitive aminopeptidase
	Ant-TAContig2536	3932	EFN71155	Ants	Camponotus floridanus	SH2 domain-containing adapter protein F
	Ant-TAContig2200	3929	EFN74241	Ants	Camponotus floridanus	Cytospin-A
	kmr27_comp88427_c3_seq1	3928	E2A9B8	Ants	Camponotus floridanus	Uncharacterized protein C2orf34-like protein
	Ant-TAContig378	3926	EFN68181	Ants	Camponotus floridanus	Importin-13
	Ant-TAContig5692	3920	EFN70623	Ants	Camponotus floridanus	DNA mismatch repair protein Msh2
	kmr27_comp90598_c1_seq2	3913	E2AL21	Ants	Camponotus floridanus	RNA-binding protein 10
	kmr23_comp73407_c0_seq1	3912	EFN66756	Ants	Camponotus floridanus	Structural maintenance of chromosomes protein 3
	kmr25_comp66209_c0_seq1	3911	E2A0D7	Ants	Camponotus floridanus	RNA-binding protein 26
	Ant-TAContig10185	3907	EFN69024	Ants	Camponotus floridanus	Transcription initiation factor TFIID subunit 1
	kmr27_comp88607_c3_seq18	3898	EFN74989	Ants	Camponotus floridanus	Rho GTPase-activating protein 20
	kmr29_comp87193_c0_seq1	3896	E2AFM9	Ants	Camponotus floridanus	Uncharacterized protein C12orf11
	Ant-TAContig2513	3878	EFN74555	Ants	Camponotus floridanus	PX domain-containing protein kinase-like protein
	Ant-TAContig5209	3872	EFN66444	Ants	Camponotus floridanus	Exostosin-1
	kmr23_comp37224_c0_seq1	3866	EFN61655	Ants	Camponotus floridanus	Leucyl-tRNA synthetase, cytoplasmic
	Ant-TAContig262	3864	EFN72468	Ants	Camponotus floridanus	Catenin alpha
	Ant-TAContig4598	3863	EFN62352	Ants	Camponotus floridanus	TBC domain-containing protein kinase-like protein
	kmr23_comp38931_c0_seq1	3854	EFN66335	Ants	Camponotus floridanus	LIM domain kinase 1
	Ant-TAContig5525	3848	EFN70537	Ants	Camponotus floridanus	hypothetical protein EAG_01245
	kmr31_comp1622_c0_seq1	3847	EFN60579	Ants	Camponotus floridanus	Angiotensin-converting enzyme
	kmr27_comp80886_c0_seq1	3838	F4X7W3	Ants	Acromyrmex echinatior	Membrane-bound transcription factor site-1 protease
	kmr23_comp43636_c0_seq1	3832	EFN72459	Ants	Camponotus floridanus	Erythroid differentiation-related factor 1
	kmr27_comp90836_c4_seq6	3831	EFN62092	Ants	Camponotus floridanus	Ankyrin repeat and fibronectin type-III domain-containing protein 1
	Ant-TAContig4468	3829	EFN64278	Ants	Camponotus floridanus	Microtubule-associated protein futsch
	kmr25_comp82608_c1_seq1	3824	E9IEC1	Ants	Solenopsis invicta	Putative uncharacterized protein (Fragment)
	Ant-TAContig6812	3823	EFN71330	Ants	Camponotus floridanus	Putative GPI-anchor transamidase
	kmr23_comp53546_c1_seq1	3820	EFN81652	Ants	Harpegnathos saltator	Epidermal growth factor receptor substrate 15-like 1
	Ant-TAContig4641	3815	EFN61251	Ants	Camponotus floridanus	HBS1-like protein
	Ant-TAContig2509	3800	EFN62033	Ants	Camponotus floridanus	Glutamyl aminopeptidase
	kmr23_comp72374_c0_seq1	3792	EFN65601	Ants	Camponotus floridanus	Aminopeptidase N
	kmr23_comp74027_c0_seq1	3791	E2AS08	Ants	Camponotus floridanus	Transcription initiation factor TFIID subunit 2
	kmr23_comp73515_c0_seq1	3789	EFN69752	Ants	Camponotus floridanus	DNA-directed RNA polymerase II subunit RPB2
	kmr27_comp90732_c3_seq1	3786	E2AQG3	Ants	Camponotus floridanus	Putative uncharacterized protein
	kmr23_comp76669_c0_seq1	3775	EFN66554	Ants	Camponotus floridanus	RNA polymerase II-associated protein 1
	Ant-TAContig670	3771	EFN73837	Ants	Camponotus floridanus	Pancreatic lipase-related protein 2
	Ant-TAContig11883	3756	EFN70172	Ants	Camponotus floridanus	AP-2 complex subunit alpha
	kmr23_comp73790_c0_seq1	3756	EFN72866	Ants	Camponotus floridanus	Coatomer subunit alpha
	kmr25_comp85169_c0_seq1	3756	E1ZVT0	Ants	Camponotus floridanus	Glycine dehydrogenase [decarboxylating], mitochondrial
	kmr29_comp86284_c0_seq1	3751	E2ALE6	Ants	Camponotus floridanus	Probable phpholipid-transporting ATPase IIB
	Ant-TAContig87	3725	EFN68140	Ants	Camponotus floridanus	FACT complex subunit Ssrp1
	Ant-TAContig2230	3717	EFN72038	Ants	Camponotus floridanus	Importin-7
	Ant-TAContig3378	3714	EGI66627	Ants	Acromyrmex echinatior	Histone-lysine N-methyltransferase eggless
	kmr23_comp34753_c1_seq1	3713	EFN68192	Ants	Camponotus floridanus	Symplekin
	kmr27_comp85812_c0_seq1	3710	E2A134	Ants	Camponotus floridanus	Nuclear pore complex protein Nup93 (Fragment)
	kmr23_comp74712_c0_seq1	3709	EFN64694	Ants	Camponotus floridanus	Structural maintenance of chromosomes protein 2
	kmr29_comp93759_c1_seq1	3705	E2AKU8	Ants	Camponotus floridanus	THO complex subunit 2
	kmr23_comp65304_c0_seq1	3703	E2AEL5	Ants	Camponotus floridanus	Laminin subunit alpha-1
	Ant-TAContig2093	3702	EFN68592	Ants	Camponotus floridanus	Transcription factor 25
	Ant-TAContig10421	3701	EFN60287	Ants	Camponotus floridanus	AP-1 complex subunit gamma-1
	Ant-TAContig1866	3694	EFN72767	Ants	Camponotus floridanus	Insulin-like growth factor-binding protein complex acid labile chain
	kmr23_comp72051_c0_seq1	3682	EFN68776	Ants	Camponotus floridanus	Probable dolichyl-P-Man:Man(7)GlcNAc(2)-PP-dolichyl-alpha-1, 6-mannosyltransferase
	kmr25_comp63270_c0_seq1	3680	E2A3F5	Ants	Camponotus floridanus	Vesicle-associated membrane protein-associated protein A
	kmr25_comp85566_c0_seq1	3678	E1ZWE4	Ants	Camponotus floridanus	Cadherin-23
	Ant-TAContig832	3669	EFN71856	Ants	Camponotus floridanus	hypothetical protein EAG_13682
	kmr23_comp71879_c0_seq1	3667	EFN69698	Ants	Camponotus floridanus	Serine/threonine-protein phosphatase 6
	kmr23_comp76161_c0_seq1	3667	EFN67040	Ants	Camponotus floridanus	Uncharacterized protein KIAA1033
	Ant-TAContig2922	3666	EFN65253	Ants	Camponotus floridanus	FYVE, RhoGEF and PH domain-containing protein 4
	kmr27_comp89975_c1_seq1	3661	E2AXF0	Ants	Camponotus floridanus	Zinc finger protein Xfin (Fragment)
	kmr23_comp54343_c2_seq1	3660	EFN66895	Ants	Camponotus floridanus	Acidic fibroblast growth factor intracellular-binding protein
	Ant-TAContig6111	3659	EFN70417	Ants	Camponotus floridanus	hypothetical protein EAG_08712
	Ant-TAContig1513	3659	EGI58326	Ants	Acromyrmex echinatior	Synaptic vesicle glycoprotein 2B
	kmr27_comp91050_c0_seq1	3640	E9I9M5	Ants	Solenopsis invicta	Putative uncharacterized protein (Fragment)
	kmr23_comp70258_c1_seq1	3639	E2AKV6	Ants	Camponotus floridanus	Heat shock 70 kDa protein cognate 4
	Ant-TAContig3368	3639	EFN72823	Ants	Camponotus floridanus	hypothetical protein EAG_00904
	kmr25_comp81160_c0_seq1	3633	E2AAI3	Ants	Camponotus floridanus	Protein singed
	kmr23_comp33757_c0_seq1	3627	EFN66290	Ants	Camponotus floridanus	Dosage compensation regulator
	kmr23_comp34931_c1_seq1	3622	EFN62997	Ants	Camponotus floridanus	Uncharacterized protein KIAA0406
	Ant-TAContig382	3620	EFN60268	Ants	Camponotus floridanus	Tankyrase-1
	Ant-TAContig6575	3616	EFN65055	Ants	Camponotus floridanus	Serine/threonine-protein kinase TAO1
	kmr23_comp34716_c1_seq1	3611	EFN62974	Ants	Camponotus floridanus	Nuclear pore complex protein Nup214
	Ant-TAContig1922	3609	EFN80755	Ants	Harpegnathos saltator	Delta-1-pyrroline-5-carboxylate dehydrogenase, mitochondrial
	kmr23_comp70934_c0_seq1	3605	E2AX12	Ants	Camponotus floridanus	Acyl-CoA Delta(11) desaturase
	kmr23_comp34410_c0_seq1	3602	EGI69089	Ants	Acromyrmex echinatior	Tankyrase-1
	kmr25_comp84572_c0_seq1	3600	E1ZUU4	Ants	Camponotus floridanus	Putative uncharacterized protein
	kmr25_comp66623_c0_seq1	3600	EFN73171	Ants	Camponotus floridanus	Structural maintenance of chromosomes protein 5
	Ant-TAContig181	3596	EFN71264	Ants	Camponotus floridanus	Serine/threonine-protein kinase PFTAIRE-1
	kmr25_comp79615_c1_seq1	3595	F4WJT6	Ants	Acromyrmex echinatior	Proteasome-associated protein ECM29-like protein
	Ant-TAContig6401	3589	EFN68906	Ants	Camponotus floridanus	UPF0629 protein C17orf42-like protein
	Ant-TAContig2699	3586	EFN68189	Ants	Camponotus floridanus	hypothetical protein EAG_05081
	kmr23_comp71421_c0_seq1	3585	EFN72493	Ants	Camponotus floridanus	Importin-5
	Ant-TAContig3	3581	EFN63603	Ants	Camponotus floridanus	Proliferation-associated protein 2G4
	kmr29_comp90801_c0_seq1	3576	EFN68155	Ants	Camponotus floridanus	E3 ubiquitin-protein ligase TRIM33
	kmr23_comp75636_c0_seq1	3575	EFN72997	Ants	Camponotus floridanus	Nuclear pore complex protein Nup133
	kmr29_comp92371_c0_seq1	3574	F4WWU1	Ants	Acromyrmex echinatior	Serine/threonine-protein kinase PAK 1
	kmr23_comp71872_c0_seq1	3572	EGI63206	Ants	Acromyrmex echinatior	ATP-binding cassette sub-family G member 5
	kmr25_comp83647_c0_seq1	3570	E2ADT2	Ants	Camponotus floridanus	Sorting nexin-33
	Ant-TAContig3293	3570	EFN74217	Ants	Camponotus floridanus	UPF0486 protein C1orf59-like protein
	Ant-TAContig459	3567	EFN66400	Ants	Camponotus floridanus	DnaJ-like protein subfamily C member 14
	Ant-TAContig65	3566	EFN69147	Ants	Camponotus floridanus	Solute carrier organic anion transporter family member 2B1
	kmr25_comp81207_c0_seq1	3561	EFN67257	Ants	Camponotus floridanus	Chitotriosidase-1
	kmr25_comp84096_c0_seq1	3561	E2BYV3	Ants	Harathos saltator	Superoxide dismutase [Cu-Zn]
	Ant-TAContig2398	3560	EFN71810	Ants	Camponotus floridanus	Coiled-coil domain-containing protein 64-like protein
	kmr25_comp62409_c0_seq1	3557	EFN65598	Ants	Camponotus floridanus	Aminopeptidase N
	kmr23_comp55673_c1_seq1	3552	EFN73258	Ants	Camponotus floridanus	Gamma-tubulin complex component 3
	kmr25_comp83812_c1_seq1	3551	E2APE3	Ants	Camponotus floridanus	Gamma-tubulin complex component 5 (Fragment)
	kmr23_comp32994_c0_seq1	3544	EGI69358	Ants	Acromyrmex echinatior	Exostosin-3
	kmr31_comp2847_c0_seq1	3537	EFN73935	Ants	Camponotus floridanus	Arylphorin subunit alpha
	Ant-TAContig2425	3536	EFN74402	Ants	Camponotus floridanus	Importin-4
	kmr27_comp91229_c1_seq23	3536	E2ASZ1	Ants	Camponotus floridanus	Trimethylguanine synthase-like protein
	kmr27_comp84344_c0_seq1	3527	E2AE23	Ants	Camponotus floridanus	Cerebellar degeneration-related protein 2-like
	Insect-TAContig331	3526	EGI57712	Ants	Acromyrmex echinatior	Calmodulin
	kmr23_comp67827_c3_seq1	3526	EFN64360	Ants	Camponotus floridanus	Discoidin domain-containing receptor 2
	Ant-TAContig6749	3524	EFN70941	Ants	Camponotus floridanus	Vacuolar ATP synthase catalytic subunit A
	kmr27_comp88764_c1_seq4	3523	EFN68197	Ants	Camponotus floridanus	Tubulin-specific chaperone cofactor E-like protein
	Ant-TAContig940	3521	EFN70980	Ants	Camponotus floridanus	E3 SUMO-protein ligase RanBP2
	Ant-TAContig3202	3521	EFN63972	Ants	Camponotus floridanus	hypothetical protein EAG_09585
	Ant-TAContig3282	3512	EFN74067	Ants	Camponotus floridanus	Uncharacterized protein KIAA0226
	Ant-TAContig6434	3509	EFN66596	Ants	Camponotus floridanus	Metal transporter CNNM2
	Ant-TAContig198	3501	EFN72022	Ants	Camponotus floridanus	Breast cancer type 2 susceptibility protein-like protein
	Ant-TAContig361	3500	EFN70024	Ants	Camponotus floridanus	Adenomatous polyposis coli protein
	kmr23_comp70945_c0_seq1	3495	EFN73448	Ants	Camponotus floridanus	Glycogen phosphorylase
	kmr29_comp94589_c2_seq1	3491	EFN70593	Ants	Camponotus floridanus	hypothetical protein EAG_03184
	Ant-TAContig6273	3487	EFN81053	Ants	Harpegnathos saltator	cAMP response element-binding protein
	kmr23_comp71089_c0_seq1	3482	EFN68169	Ants	Camponotus floridanus	Coatomer subunit beta'
	kmr29_comp91682_c0_seq1	3479	E2AR25	Ants	Camponotus floridanus	Transcriptional-regulating factor 1 (Fragment)
	Ant-TAContig2533	3473	EGI65656	Ants	Acromyrmex echinatior	DNA excision repair protein ERCC-6
	kmr23_comp41252_c1_seq1	3472	EFN65721	Ants	Camponotus floridanus	hypothetical protein EAG_05454
	Ant-TAContig4476	3471	EGI68891	Ants	Acromyrmex echinatior	Dihydropyrimidine dehydrogenase
	Ant-TAContig372	3468	EFN61815	Ants	Camponotus floridanus	Pyridoxal-dependent decarboxylase domain-containing protein 1
	kmr29_comp96768_c4_seq4	3465	E2ADW0	Ants	Camponotus floridanus	Zinc finger protein 91
	kmr25_comp82085_c0_seq1	3464	E2A599	Ants	Camponotus floridanus	Lysomal alpha-glucidase
	kmr29_comp93257_c0_seq1	3461	EFN71594	Ants	Camponotus floridanus	Heparanase
	kmr23_comp33746_c0_seq1	3461	EFN70963	Ants	Camponotus floridanus	Protein KRI1-like protein
	Ant-TAContig456	3459	EFN68130	Ants	Camponotus floridanus	Leucine carboxyl methyltransferase 1
	kmr29_comp93835_c0_seq1	3456	E2ASZ2	Ants	Camponotus floridanus	Protein embryonic gonad
	Ant-TAContig6985	3454	EFN74120	Ants	Camponotus floridanus	TPR repeat-containing protein C12orf30
	kmr25_comp77973_c0_seq1	3451	EFN66768	Ants	Camponotus floridanus	ATP-dependent DNA helicase HEL308
	Ant-TAContig6022	3444	EFN62996	Ants	Camponotus floridanus	Uncharacterized protein KIAA0090
	Ant-TAContig3377	3443	EFN65920	Ants	Camponotus floridanus	Kinesin-like protein KIF16B
	Ant-TAContig10398	3442	EGI60081	Ants	Acromyrmex echinatior	Sphingomyelin phosphodiesterase
	kmr23_comp75382_c0_seq1	3438	EFN71358	Ants	Camponotus floridanus	hypothetical protein EAG_06084
	Ant-TAContig758	3438	EFN64436	Ants	Camponotus floridanus	Phorbol ester/diacylglycerol-binding protein unc-13
	kmr25_comp84825_c0_seq1	3436	E2A5G2	Ants	Camponotus floridanus	Leucine-rich repeat-containing protein 49
	Ant-TAContig2284	3435	EFN61645	Ants	Camponotus floridanus	Hyaluronan mediated motility receptor
	kmr29_comp94563_c3_seq1	3433	EFN63536	Ants	Camponotus floridanus	Discoidin domain-containing receptor 2
	Ant-TAContig9965	3433	EFN61317	Ants	Camponotus floridanus	Heterogeneous nuclear ribonucleoprotein U-like protein 1
	Ant-TAContig2997	3433	EFN72501	Ants	Camponotus floridanus	Protein RIC1-like protein
	kmr23_comp70796_c0_seq1	3431	EGI65683	Ants	Acromyrmex echinatior	Elongation of very long chain fatty acids protein 6
	kmr29_comp92287_c0_seq1	3429	EFN73209	Ants	Camponotus floridanus	Receptor-interacting serine/threonine-protein kinase 5
	kmr23_comp33731_c1_seq1	3427	EFN74734	Ants	Camponotus floridanus	Cleavage and polyadenylation specificity factor subunit 1
	kmr29_comp89815_c2_seq1	3427	E2A5T3	Ants	Camponotus floridanus	Tyrine-protein kinase receptor
	Ant-TAContig11695	3425	EFN67844	Ants	Camponotus floridanus	Protein drumstick
	kmr27_comp91153_c0_seq1	3420	E2A5A2	Ants	Camponotus floridanus	Putative uncharacterized protein
	kmr23_comp73036_c0_seq1	3418	E2A2U1	Ants	Camponotus floridanus	Exome complex exonuclease RRP44
	kmr29_comp92611_c0_seq1	3417	EFN71933	Ants	Camponotus floridanus	Exportin-2
	kmr23_comp73274_c0_seq1	3416	EFN70522	Ants	Camponotus floridanus	hypothetical protein EAG_01230
	kmr23_comp55410_c1_seq1	3412	EFN70609	Ants	Camponotus floridanus	S phase cyclin A-associated protein in the endoplasmic reticulum
	kmr25_comp84037_c0_seq1	3402	E2ACU6	Ants	Camponotus floridanus	Probable RNA-binding protein 19
	Ant-TAContig34	3399	EFN62400	Ants	Camponotus floridanus	Ribonuclease 3
	Ant-TAContig342	3397	EFN71668	Ants	Camponotus floridanus	Sodium- and chloride-dependent GABA transporter 1
	Ant-TAContig694	3396	EFN61557	Ants	Camponotus floridanus	Neural cell adhesion molecule 2
	Ant-TAContig2893	3394	EFN61041	Ants	Camponotus floridanus	Uncharacterized protein KIAA1370-like protein
	kmr25_comp72781_c0_seq1	3387	EFN67376	Ants	Camponotus floridanus	JmjC domain-containing histone demethylation protein 1
	kmr27_comp90563_c0_seq1	3380	E2A8M6	Ants	Camponotus floridanus	Putative uncharacterized protein
	Ant-TAContig410	3368	EFN64011	Ants	Camponotus floridanus	L-xylulose reductase
	kmr25_comp84182_c0_seq1	3367	E2A9D7	Ants	Camponotus floridanus	Homeobox protein SIX4
	kmr27_comp87149_c0_seq1	3360	EFN72004	Ants	Camponotus floridanus	Uncharacterized protein KIAA1704
	kmr29_comp96927_c8_seq1	3359	E2B106	Ants	Camponotus floridanus	Myelin expression factor 2
	kmr29_comp95606_c3_seq1	3357	EFN62254	Ants	Camponotus floridanus	cAMP-specific 3',5'-cyclic phosphodiesterase
	kmr27_comp87021_c0_seq1	3349	E2A8T6	Ants	Camponotus floridanus	Bloom syndrome protein-like protein
	kmr23_comp70296_c0_seq1	3348	E2A1Q1	Ants	Camponotus floridanus	Limbic system-associated membrane protein
	kmr23_comp75827_c0_seq1	3347	E2AFJ9	Ants	Camponotus floridanus	Transmembrane protein 131
	kmr25_comp80948_c0_seq1	3344	EFN64410	Ants	Camponotus floridanus	Methionyl-tRNA synthetase, cytoplasmic
	Ant-TAContig2809	3344	EFN66820	Ants	Camponotus floridanus	Serine/threonine-protein kinase N2
	kmr23_comp33705_c1_seq1	3342	EFN69898	Ants	Camponotus floridanus	Ubiquitin carboxyl-terminal hydrolase 10
	kmr23_comp73266_c0_seq1	3341	EFN69967	Ants	Camponotus floridanus	Tripartite motif-containing protein 71
	kmr25_comp84549_c0_seq1	3340	E2A0X4	Ants	Camponotus floridanus	Leucine-rich repeat-containing protein 20
	kmr25_comp83230_c1_seq1	3328	EFN68206	Ants	Camponotus floridanus	Coatomer subunit beta
	Ant-TAContig5004	3327	EFN64951	Ants	Camponotus floridanus	DNA-binding protein Ewg
	Ant-TAContig4886	3327	EFN68531	Ants	Camponotus floridanus	Ubiquitin carboxyl-terminal hydrolase 38
	kmr23_comp79171_c0_seq1	3323	E2AR04	Ants	Camponotus floridanus	Ski oncogene
	kmr23_comp73532_c0_seq1	3321	EFN68604	Ants	Camponotus floridanus	U6 snRNA-specific terminal uridylyltransferase 1
	kmr29_comp91474_c0_seq1	3319	E2AYP8	Ants	Camponotus floridanus	WD repeat-containing protein 48
	kmr23_comp75253_c0_seq1	3318	EFN61099	Ants	Camponotus floridanus	Atrial natriuretic peptide-converting enzyme
	kmr23_comp33618_c0_seq1	3313	E2A1C5	Ants	Camponotus floridanus	Bone morphogenetic protein receptor type-1B
	kmr27_comp81660_c0_seq1	3313	E2AXQ1	Ants	Camponotus floridanus	PAP-associated domain-containing protein 5
	kmr23_comp78095_c0_seq1	3311	EFN73743	Ants	Camponotus floridanus	116 kDa U5 small nuclear ribonucleoprotein component
	kmr25_comp81353_c1_seq1	3311	E2A801	Ants	Camponotus floridanus	Cyclin G-associated kinase
	Ant-TAContig2181	3309	EFN68736	Ants	Camponotus floridanus	hypothetical protein EAG_14662
	Ant-TAContig5153	3305	EFZ10157	Ants	Solenopsis invicta	hypothetical protein SINV_08631
	Ant-TAContig5668	3304	EFN72589	Ants	Camponotus floridanus	Polycomb protein Sfmbt
	Ant-TAContig4435	3301	EFN66729	Ants	Camponotus floridanus	G1/S-specific cyclin-E
	Ant-TAContig1727	3300	EFN62443	Ants	Camponotus floridanus	hypothetical protein EAG_01634
	Ant-TAContig261	3293	EGI59403	Ants	Acromyrmex echinatior	Thrombospondin type-1 domain-containing protein 4
	Ant-TAContig2287	3291	EFN66104	Ants	Camponotus floridanus	Paraplegin
	kmr25_comp80968_c0_seq1	3289	E2A262	Ants	Camponotus floridanus	Putative uncharacterized protein
	kmr25_comp81564_c1_seq1	3286	E2AIR0	Ants	Camponotus floridanus	Epsin-2
	Ant-TAContig2534	3286	EFN60432	Ants	Camponotus floridanus	Protein FAM49B
	kmr23_comp74808_c0_seq1	3284	EFN67984	Ants	Camponotus floridanus	Leucine-zipper-like transcriptional regulator 1
	kmr27_comp85128_c3_seq1	3284	E2AB10	Ants	Camponotus floridanus	Nicotinamide mononucleotide adenylyltransferase 1
	Ant-TAContig8977	3281	EFZ14057	Ants	Solenopsis invicta	hypothetical protein SINV_04038
	Ant-TAContig9256	3280	EFZ20975	Ants	Solenopsis invicta	hypothetical protein SINV_14252
	kmr23_comp75054_c0_seq1	3278	EFN70107	Ants	Camponotus floridanus	Polyribonucleotide nucleotidyltransferase 1, mitochondrial
	kmr31_comp8512_c0_seq1	3275	EFN72635	Ants	Camponotus floridanus	UPF0614 protein C14orf102
	kmr23_comp53591_c0_seq1	3274	EFN61194	Ants	Camponotus floridanus	hypothetical protein EAG_12753
	Ant-TAContig1235	3267	EFN60274	Ants	Camponotus floridanus	hypothetical protein EAG_04353
	kmr25_comp85378_c3_seq9	3266	E2A058	Ants	Camponotus floridanus	E3 ubiquitin-protein ligase KCMF1
	kmr25_comp83644_c0_seq2	3260	EFN63569	Ants	Camponotus floridanus	MAGUK p55 subfamily member 7
	kmr29_comp79801_c0_seq1	3243	EFN64291	Ants	Camponotus floridanus	Putative ATP-dependent RNA helicase DHX30
	Ant-TAContig6549	3240	EFN67306	Ants	Camponotus floridanus	WD repeat-containing protein C10orf79
	Ant-TAContig2076	3233	EFN69729	Ants	Camponotus floridanus	FMRFamide receptor
	kmr23_comp73146_c0_seq1	3232	EFN69632	Ants	Camponotus floridanus	Poly [ADP-ribose] polymerase
	Ant-TAContig4489	3229	EFN68270	Ants	Camponotus floridanus	Putative methyltransferase METT10D
	Ant-TAContig215	3229	EFN73242	Ants	Camponotus floridanus	Putative RNA-binding protein 15B
	kmr23_comp56832_c0_seq1	3228	E1ZVU9	Ants	Camponotus floridanus	Tropomyin-2
	kmr23_comp75607_c0_seq1	3224	F4WA59	Ants	Acromyrmex echinatior	Zinc finger protein 358
	kmr27_comp81866_c0_seq1	3223	EFN64938	Ants	Camponotus floridanus	E3 ubiquitin-protein ligase Smurf1
	Ant-TAContig4226	3221	EFN72491	Ants	Camponotus floridanus	hypothetical protein EAG_13414
	Ant-TAContig31	3219	EFN61077	Ants	Camponotus floridanus	Uncharacterized protein KIAA0556
	Ant-TAContig6740	3216	EFN66319	Ants	Camponotus floridanus	hypothetical protein EAG_06292
	kmr23_comp59178_c0_seq1	3212	EFN72704	Ants	Camponotus floridanus	General transcription factor IIH subunit 1
	kmr23_comp35168_c1_seq1	3212	EFN61801	Ants	Camponotus floridanus	Integrator complex subunit 2
	Ant-TAContig4089	3199	EFN70838	Ants	Camponotus floridanus	ATPase family AAA domain-containing protein 5
	Ant-TAContig388	3194	EFN68751	Ants	Camponotus floridanus	Zinc finger protein 782
	Ant-TAContig5423	3193	EFN66329	Ants	Camponotus floridanus	Transcriptional regulator ATRX
	kmr27_comp87404_c0_seq1	3191	E2ALJ9	Ants	Camponotus floridanus	26S protease regulatory subunit 4
	kmr23_comp70092_c50_seq1	3181	EFN65942	Ants	Camponotus floridanus	Afadin
	kmr25_comp85181_c1_seq1	3181	E2A4S5	Ants	Camponotus floridanus	Sialin
	kmr25_comp77669_c0_seq2	3172	E2AHQ7	Ants	Camponotus floridanus	NADPH--cytochrome P450 reductase
	Ant-TAContig430	3167	EFN62367	Ants	Camponotus floridanus	Suppressor of cytokine signaling 5
	Ant-TAContig5757	3165	EFN72777	Ants	Camponotus floridanus	Sn1-specific diacylglycerol lipase beta
	kmr23_comp37207_c1_seq1	3163	EFN62432	Ants	Camponotus floridanus	DNA excision repair protein haywire
	kmr23_comp44231_c0_seq1	3156	EFN70431	Ants	Camponotus floridanus	hypothetical protein EAG_08726
	Ant-TAContig3894	3154	EFN73076	Ants	Camponotus floridanus	Wee1-like protein kinase
	kmr29_comp89299_c0_seq1	3153	EGI61040	Ants	Acromyrmex echinatior	C2 domain-containing protein 3
	kmr25_comp84316_c0_seq2	3153	EGI65482	Ants	Acromyrmex echinatior	Head-specific guanylate cyclase
	kmr25_comp60131_c0_seq1	3147	EFN62402	Ants	Camponotus floridanus	Zinc finger protein Xfin
	Ant-TAContig2884	3142	EFN64173	Ants	Camponotus floridanus	Serologically defined colon cancer antigen 1-like protein
	Ant-TAContig5375	3142	EFN62707	Ants	Camponotus floridanus	Sorting nexin-13
	kmr25_comp83922_c0_seq2	3141	EFN85327	Ants	Harpegnathos saltator	Ribosomal protein S6 kinase-like 1
	kmr29_comp90873_c0_seq1	3140	EFN74080	Ants	Camponotus floridanus	Probable phenoloxidase subunit CG8193
	kmr27_comp78563_c0_seq1	3139	EFN61534	Ants	Camponotus floridanus	hypothetical protein EAG_04156
	kmr23_comp65822_c1_seq1	3137	EFN71514	Ants	Camponotus floridanus	Protein 60A
	Ant-TAContig4482	3136	EFN74643	Ants	Camponotus floridanus	hypothetical protein EAG_14450
	kmr27_comp88028_c3_seq5	3133	E2A9L5	Ants	Camponotus floridanus	FERM, RhoGEF and pleckstrin domain-containing protein 2
	kmr27_comp87572_c0_seq1	3131	E2AI62	Ants	Camponotus floridanus	Protein krueppel (Fragment)
	Ant-TAContig3701	3125	EFN84996	Ants	Harpegnathos saltator	Glutamate receptor, ionotropic kainate 2
	Ant-TAContig1920	3124	EFN73964	Ants	Camponotus floridanus	Transcription factor CP2
	kmr23_comp71222_c0_seq1	3120	EFN67545	Ants	Camponotus floridanus	C-1-tetrahydrofolate synthase, cytoplasmic
	kmr29_comp92000_c1_seq1	3119	EFN72742	Ants	Camponotus floridanus	WD repeat-containing protein 82
	Ant-TAContig3382	3118	EFN62076	Ants	Camponotus floridanus	hypothetical protein EAG_04210
	Ant-TAContig5309	3117	EFN63156	Ants	Camponotus floridanus	Serine/threonine-protein kinase VRK1
	Ant-TAContig149	3113	EFN63932	Ants	Camponotus floridanus	PHD finger protein 14
	Ant-TAContig599	3109	EFN65417	Ants	Camponotus floridanus	hypothetical protein EAG_14180
	kmr23_comp50416_c0_seq1	3108	EFN70886	Ants	Camponotus floridanus	hypothetical protein EAG_05635
	kmr23_comp69163_c17_seq1	3106	EFN78752	Ants	Harpegnathos saltator	Protein strawberry notch
	kmr23_comp72678_c0_seq1	3105	EGI57792	Ants	Acromyrmex echinatior	GS1-like protein
	kmr29_comp92089_c0_seq1	3104	E2APC5	Ants	Camponotus floridanus	Ankyrin repeat and zinc finger domain-containing protein 1
	Ant-TAContig422	3101	EFN71153	Ants	Camponotus floridanus	hypothetical protein EAG_05390
	Ant-TAContig2892	3099	EFN73686	Ants	Camponotus floridanus	Macoilin
	kmr25_comp84329_c2_seq1	3098	E2A7R4	Ants	Camponotus floridanus	Prenylcysteine oxidase-like (Fragment)
	kmr27_comp88980_c1_seq1	3097	E2ATA1	Ants	Camponotus floridanus	39S ribomal protein L37, mitochondrial
	kmr31_comp1240_c1_seq1	3097	EFN70864	Ants	Camponotus floridanus	Protein kinase C-binding protein 1
	Ant-TAContig1925	3097	EFN72668	Ants	Camponotus floridanus	WD repeat and HMG-box DNA-binding protein 1
	kmr29_comp86053_c0_seq1	3097	E2AQ06	Ants	Camponotus floridanus	WD repeat-containing protein 33
	kmr23_comp74314_c0_seq1	3089	EFN73824	Ants	Camponotus floridanus	Cleavage stimulation factor 50 kDa subunit
	Ant-TAContig1803	3070	EFN73908	Ants	Camponotus floridanus	CWF19-like protein 2
	Ant-TAContig4855	3070	EFN66721	Ants	Camponotus floridanus	hypothetical protein EAG_00711
	kmr25_comp83720_c1_seq2	3068	E2B0R4	Ants	Camponotus floridanus	Neuropilin and tolloid-like protein 2
	kmr31_comp1672_c0_seq1	3067	EFN70723	Ants	Camponotus floridanus	A disintegrin and metalloproteinase with thrombospondin motifs 14
	Ant-TAContig5661	3062	EFZ12478	Ants	Solenopsis invicta	hypothetical protein SINV_10006
	kmr23_comp71383_c0_seq1	3061	EFZ21649	Ants	Solenopsis invicta	hypothetical protein SINV_13705
	kmr25_comp62128_c0_seq1	3060	EFN70808	Ants	Camponotus floridanus	Glutamate dehydrogenase, mitochondrial
	kmr23_comp44814_c0_seq1	3059	EFZ14234	Ants	Solenopsis invicta	hypothetical protein SINV_09349
	kmr23_comp34654_c1_seq1	3057	EGI59769	Ants	Acromyrmex echinatior	Protein kintoun
	kmr23_comp33637_c0_seq1	3055	EGI67741	Ants	Acromyrmex echinatior	Conserved oligomeric Golgi complex subunit 1
	kmr27_comp91516_c0_seq1	3054	EGI68582	Ants	Acromyrmex echinatior	hypothetical protein G5I_02681
	Ant-TAContig2302	3054	EGI69081	Ants	Acromyrmex echinatior	Leucine-rich repeat-containing protein 27
	Ant-TAContig3062	3050	EGI68162	Ants	Acromyrmex echinatior	DNA repair protein complementing XP-C cells-like protein
	Ant-TAContig7948	3050	EFN74191	Ants	Camponotus floridanus	Sodium-dependent dopamine transporter
	kmr23_comp33667_c0_seq1	3048	EFN73981	Ants	Camponotus floridanus	Disks large-associated protein 5
	Ant-TAContig7231	3047	EFN73002	Ants	Camponotus floridanus	Transient receptor potential cation channel CG34123
	Ant-TAContig5271	3047	EFN61937	Ants	Camponotus floridanus	WD repeat-containing protein 20
	kmr25_comp80697_c0_seq1	3036	EFN66674	Ants	Camponotus floridanus	Uncharacterized protein C1orf26
	Ant-TAContig3196	3034	EGI62575	Ants	Acromyrmex echinatior	Nucleolar protein 14-like protein
	Ant-TAContig3187	3031	EFN62895	Ants	Camponotus floridanus	Origin recognition complex subunit 4
	kmr23_comp67397_c3_seq1	3030	E2AIU9	Ants	Camponotus floridanus	Putative uncharacterized protein
	kmr23_comp74926_c0_seq1	3029	EFN69068	Ants	Camponotus floridanus	Vacuolar protein sorting-associated protein 41-like protein
	Ant-TAContig4457	3029	EFN63757	Ants	Camponotus floridanus	Zinc finger protein 408
	kmr23_comp72117_c0_seq1	3025	EGI64004	Ants	Acromyrmex echinatior	26S proteasome non-ATPase regulatory subunit 2
	kmr23_comp34358_c0_seq1	3024	EFN74505	Ants	Camponotus floridanus	Vacuolar protein sorting-associated protein 11-like protein
	Ant-TAContig10469	3021	EFN63503	Ants	Camponotus floridanus	Rhomboid family member 1
	kmr25_comp82808_c0_seq1	3020	EFN72821	Ants	Camponotus floridanus	DNA ligase 1
	kmr23_comp33704_c0_seq1	3018	EGI60151	Ants	Acromyrmex echinatior	Succinate dehydrogenase [ubiquinone] flavoprotein subunit, mitochondrial
	kmr25_comp78098_c0_seq1	3016	EGI61164	Ants	Acromyrmex echinatior	Mitochondrial Rho GTPase
	kmr23_comp76403_c0_seq1	3016	F4WI42	Ants	Acromyrmex echinatior	Oxysterol-binding protein (Fragment)
	Ant-TAContig4979	3014	EFN62275	Ants	Camponotus floridanus	Acidic repeat-containing protein
	kmr27_comp89663_c0_seq1	3013	E1ZXV4	Ants	Camponotus floridanus	PAB-dependent poly(A)-specific ribonuclease subunit 2
	kmr23_comp33837_c0_seq1	3011	EGI65577	Ants	Acromyrmex echinatior	LMBR1 domain-containing protein 2-like protein
	kmr23_comp69953_c0_seq1	3011	EFN61404	Ants	Camponotus floridanus	Muscle M-line assembly protein unc-89
	kmr25_comp81012_c2_seq1	3003	E1ZVJ0	Ants	Camponotus floridanus	Dynein heavy chain 2, axonemal
	Ant-TAContig10100	3002	EFN70817	Ants	Camponotus floridanus	Mannosyl-oligosaccharide glucosidase
	kmr29_comp92401_c1_seq1	3001	EFN63276	Ants	Camponotus floridanus	Lipase member H-A
	Ant-TAContig4106	2995	EFN63170	Ants	Camponotus floridanus	Coatomer subunit delta
	kmr23_comp67476_c3_seq1	2992	EFN65017	Ants	Camponotus floridanus	E3 ubiquitin-protein ligase RING2
	kmr23_comp73135_c0_seq1	2992	EGI60621	Ants	Acromyrmex echinatior	Retrograde Golgi transport protein RGP1-like protein
	kmr23_comp47301_c1_seq1	2990	EFN83220	Ants	Harpegnathos saltator	SWI/SNF-related matrix-associated actin-dependent regulator of chromatin subfamily A containing DEAD/H box 1
	kmr27_comp85834_c0_seq1	2987	EFN60454	Ants	Camponotus floridanus	Forkhead transcription factor HCM1
	kmr25_comp77890_c0_seq1	2987	EFN74268	Ants	Camponotus floridanus	S-formylglutathione hydrolase
	kmr27_comp89515_c9_seq1	2984	EFN63817	Ants	Camponotus floridanus	Clathrin interactor 1
	kmr27_comp89325_c1_seq1	2983	E2A772	Ants	Camponotus floridanus	Putative uncharacterized protein
	kmr29_comp93603_c0_seq1	2979	E2AX34	Ants	Camponotus floridanus	NF-kappa-B-repressing factor
	kmr25_comp83253_c0_seq1	2979	EFN69131	Ants	Camponotus floridanus	Probable transcription factor Ken
	kmr29_comp81047_c0_seq1	2974	EFN60400	Ants	Camponotus floridanus	85 kDa calcium-independent phospholipase A2
	kmr25_comp81038_c0_seq1	2974	EFN63810	Ants	Camponotus floridanus	Coiled-coil domain-containing protein 147
	kmr25_comp84414_c0_seq1	2973	EFN67712	Ants	Camponotus floridanus	S1 RNA-binding domain-containing protein 1
	kmr23_comp73612_c0_seq1	2973	E2ARF9	Ants	Camponotus floridanus	SCY1-like protein 2
	kmr23_comp74791_c0_seq1	2972	E9IL31	Ants	Solenopsis invicta	Putative uncharacterized protein (Fragment)
	kmr23_comp71896_c0_seq1	2971	EFN64372	Ants	Camponotus floridanus	CCAAT/enhancer-binding protein zeta
	kmr25_comp40877_c0_seq1	2971	E2A0N1	Ants	Camponotus floridanus	Dolichyl-diphphooligaccharide--protein glycyltransferase subunit STT3A
	kmr25_comp73183_c0_seq1	2967	E2AG83	Ants	Camponotus floridanus	39S ribomal protein L9, mitochondrial
	kmr23_comp76719_c0_seq1	2966	EFN68786	Ants	Camponotus floridanus	Scm-like with four MBT domains protein 1
	kmr23_comp73484_c0_seq1	2964	EFN66077	Ants	Camponotus floridanus	Periodic tryptophan protein 2-like protein
	kmr23_comp69294_c0_seq1	2954	EFN63436	Ants	Camponotus floridanus	Serine/threonine-protein kinase SBK1
	kmr23_comp33922_c1_seq1	2951	EGI65187	Ants	Acromyrmex echinatior	General vesicular transport factor p115
	kmr29_comp94915_c0_seq1	2951	EFN72173	Ants	Camponotus floridanus	hypothetical protein EAG_00956
	kmr27_comp61827_c0_seq1	2949	EFN71922	Ants	Camponotus floridanus	Long-chain fatty acid transport protein 4
	Ant-TAContig326	2947	EFN66075	Ants	Camponotus floridanus	Elongation of very long chain fatty acids protein 4
	Ant-TAContig6593	2943	EFN81115	Ants	Harpegnathos saltator	Protein CBFA2T3
	kmr23_comp75355_c0_seq1	2942	EFN63816	Ants	Camponotus floridanus	Rho GTPase-activating protein 19
	kmr25_comp82000_c0_seq1	2941	E2A417	Ants	Camponotus floridanus	N-acetylgalactaminyltransferase 6
	kmr23_comp74575_c0_seq1	2940	EFN64394	Ants	Camponotus floridanus	Androgen-induced proliferation inhibitor
	Ant-TAContig3462	2940	EFN60907	Ants	Camponotus floridanus	Peroxidase
	kmr31_comp3706_c0_seq1	2939	E2AJL2	Ants	Camponotus floridanus	Exome component 10
	kmr27_comp91459_c6_seq2	2938	E2A7A8	Ants	Camponotus floridanus	Apoptis inhibitor IAP
	kmr27_comp89889_c3_seq2	2933	EFN66820	Ants	Camponotus floridanus	Serine/threonine-protein kinase N2
	kmr23_comp74677_c0_seq1	2930	EGI68010	Ants	Acromyrmex echinatior	Zinc finger protein 648
	Ant-TAContig4483	2927	EFN74730	Ants	Camponotus floridanus	PDZ domain-containing protein 2
	kmr25_comp72445_c0_seq1	2926	EFN64722	Ants	Camponotus floridanus	Ubiquitin carboxyl-terminal hydrolase 5
	Ant-TAContig2708	2925	EFN62856	Ants	Camponotus floridanus	MOXD1-like protein 1
	Ant-TAContig1460	2922	EFN69591	Ants	Camponotus floridanus	hypothetical protein EAG_12875
	Ant-TAContig6005	2922	EFN69712	Ants	Camponotus floridanus	Proto-oncogene tyrosine-protein kinase receptor ret
	kmr27_comp88888_c2_seq1	2922	E2ADW0	Ants	Camponotus floridanus	Zinc finger protein 91
	Ant-TAContig3448	2920	EGI59236	Ants	Acromyrmex echinatior	Krueppel-like factor 10
	Ant-TAContig6301	2916	EFN73029	Ants	Camponotus floridanus	hypothetical protein EAG_11321
	Ant-TAContig10253	2914	EFZ09943	Ants	Solenopsis invicta	hypothetical protein SINV_14691
	Ant-TAContig3937	2914	EFN60314	Ants	Camponotus floridanus	WD repeat and FYVE domain-containing protein 3
	Ant-TAContig4718	2911	EFN71794	Ants	Camponotus floridanus	Down syndrome cell adhesion molecule
	kmr29_comp90397_c0_seq1	2910	EFN61428	Ants	Camponotus floridanus	hypothetical protein EAG_10804
	Ant-TAContig4486	2909	EFN74490	Ants	Camponotus floridanus	Cadherin-23
	Ant-TAContig486	2909	EFN74949	Ants	Camponotus floridanus	hypothetical protein EAG_04008
	Ant-TAContig3973	2905	EGI67171	Ants	Acromyrmex echinatior	Pleiotropic regulator 1
	kmr29_comp90321_c0_seq1	2904	E2AUE3	Ants	Camponotus floridanus	General vesicular transport factor p115
	kmr27_comp86515_c0_seq1	2903	E2A788	Ants	Camponotus floridanus	ADP-dependent glucokinase
	Ant-TAContig126	2896	EFN62114	Ants	Camponotus floridanus	Metastasis-associated protein MTA1
	kmr23_comp74686_c0_seq1	2892	EFN66582	Ants	Camponotus floridanus	Condensin complex subunit 3
	kmr23_comp34385_c1_seq1	2886	EFN64317	Ants	Camponotus floridanus	hypothetical protein EAG_03419
	Ant-TAContig4750	2882	EFN69102	Ants	Camponotus floridanus	Nucleolar complex protein 2-like protein
	Ant-TAContig177	2882	EFN61749	Ants	Camponotus floridanus	RNA polymerase II subunit A C-terminal domain phosphatase
	kmr23_comp74788_c0_seq1	2881	EFN70718	Ants	Camponotus floridanus	DNA topoisomerase 3-beta-1
	Ant-TAContig3186	2878	EFN70769	Ants	Camponotus floridanus	Putative helicase Mov10l1
	kmr31_comp6597_c0_seq1	2876	EFN68837	Ants	Camponotus floridanus	Transportin-3
	kmr29_comp96448_c0_seq2	2875	EFZ16678	Ants	Solenopsis invicta	hypothetical protein SINV_09276
	kmr27_comp75476_c0_seq1	2874	EFN72706	Ants	Camponotus floridanus	Caprin-1
	kmr29_comp95752_c0_seq9	2874	E2A9I2	Ants	Camponotus floridanus	CD82 antigen
	Ant-TAContig2786	2874	EFN70041	Ants	Camponotus floridanus	Drebrin-like protein
	Ant-TAContig2508	2872	EFN67213	Ants	Camponotus floridanus	Cytochrome P450 4g1
	Ant-TAContig2320	2869	EFN73519	Ants	Camponotus floridanus	Protein phosphatase 1G
	Ant-TAContig6640	2867	EFN72383	Ants	Camponotus floridanus	Transmembrane channel-like protein 3
	kmr23_comp72562_c0_seq1	2866	EFN67778	Ants	Camponotus floridanus	Protein piwi
	kmr29_comp91989_c1_seq1	2862	EFN62077	Ants	Camponotus floridanus	Hepatocyte growth factor-regulated tyrosine kinase substrate
	kmr27_comp88852_c0_seq10	2862	EFN67661	Ants	Camponotus floridanus	SET and MYND domain-containing protein 4
	kmr25_comp83839_c0_seq1	2860	E2A820	Ants	Camponotus floridanus	NAD kinase
	kmr27_comp91750_c0_seq1	2860	F4WLG1	Ants	Acromyrmex echinatior	NADH dehydrogenase [ubiquinone] flavoprotein 1, mitochondrial
	kmr23_comp35968_c0_seq1	2860	EFN66447	Ants	Camponotus floridanus	Protein hunchback
	kmr23_comp53423_c0_seq1	2857	EFN65623	Ants	Camponotus floridanus	N-terminal kinase-like protein
	kmr25_comp87224_c0_seq1	2852	E2AJN6	Ants	Camponotus floridanus	Double-strand-break repair protein rad21-like protein
	Ant-TAContig301	2852	EFN63708	Ants	Camponotus floridanus	hypothetical protein EAG_09634
	Ant-TAContig419	2852	EFN64283	Ants	Camponotus floridanus	PITSLRE serine/threonine-protein kinase CDC2L1
	Ant-TAContig3789	2852	EFN71531	Ants	Camponotus floridanus	Protein deltex
	Ant-TAContig4472	2850	EFN65702	Ants	Camponotus floridanus	Dihydrolipoyllysine-residue succinyltransferase component of 2-oxoglutarate dehydrogenase complex, mitochondrial
	kmr23_comp68631_c0_seq1	2845	E9J397	Ants	Solenopsis invicta	Putative uncharacterized protein (Fragment)
	kmr29_comp92537_c2_seq1	2843	EFN61986	Ants	Camponotus floridanus	Coiled-coil domain-containing protein 132
	Ant-TAContig1362	2838	EFN72871	Ants	Camponotus floridanus	Tyrosine-protein phosphatase non-receptor type 1
	kmr27_comp90887_c4_seq9	2836	EFN66001	Ants	Camponotus floridanus	TWiK family of potassium channels protein 7
	Ant-TAContig4854	2830	EFN69816	Ants	Camponotus floridanus	hypothetical protein EAG_11434
	Ant-TAContig4092	2829	EFN73273	Ants	Camponotus floridanus	Multiple epidermal growth factor-like domains 10
	Ant-TAContig4020	2825	EGI65578	Ants	Acromyrmex echinatior	Proteasome-associated protein ECM29-like protein
	Ant-TAContig2572	2823	EFN61307	Ants	Camponotus floridanus	Alsin
	kmr23_comp33781_c0_seq1	2822	EFZ13854	Ants	Solenopsis invicta	hypothetical protein SINV_11824
	Ant-TAContig2901	2820	EFN72016	Ants	Camponotus floridanus	Heat shock protein HSP 90-alpha
	kmr29_comp91144_c1_seq1	2815	EFN66569	Ants	Camponotus floridanus	Presenilin-like protein
	kmr25_comp85216_c1_seq1	2812	E2AW84	Ants	Camponotus floridanus	Uncharacterized protein C7orf26-like protein
	kmr25_comp82466_c0_seq2	2811	E2AR16	Ants	Camponotus floridanus	Atlastin-2
	kmr29_comp94935_c1_seq1	2811	E2ABM3	Ants	Camponotus floridanus	Tuftelin-interacting protein 11
	kmr25_comp85551_c0_seq1	2810	E2BHH4	Ants	Harathos saltator	Potassium/sodium hyperpolarization-activated cyclic nucleotide-gated channel 1
	Ant-TAContig3733	2809	EFN73504	Ants	Camponotus floridanus	Dynein heavy chain 1, axonemal
	kmr23_comp74526_c0_seq1	2809	E2AED4	Ants	Camponotus floridanus	Nuclear pore complex protein Nup107
	kmr23_comp71721_c0_seq1	2807	EFN72105	Ants	Camponotus floridanus	Phospholipase A-2-activating protein
	kmr23_comp64319_c0_seq1	2806	EFN74803	Ants	Camponotus floridanus	Dynein heavy chain 8, axonemal
	kmr23_comp71941_c0_seq1	2806	EFN61190	Ants	Camponotus floridanus	hypothetical protein EAG_12749
	kmr23_comp77010_c0_seq1	2806	EFN73275	Ants	Camponotus floridanus	Tenascin-X
	kmr23_comp33686_c1_seq1	2805	EFN68470	Ants	Camponotus floridanus	Centrosome-associated zinc finger protein CP190
	Ant-TAContig64	2805	EFN87137	Ants	Harpegnathos saltator	Tetraspanin-11
	Ant-TAContig580	2802	EFN67110	Ants	Camponotus floridanus	Talin-1
	kmr25_comp77550_c0_seq1	2801	E1ZX68	Ants	Camponotus floridanus	Importin subunit alpha
	kmr23_comp56493_c1_seq1	2800	EFN72884	Ants	Camponotus floridanus	Chondroitin sulfate proteoglycan 4
	kmr23_comp34031_c0_seq1	2798	EFN60517	Ants	Camponotus floridanus	Proactivator polypeptide
	kmr23_comp73041_c0_seq1	2794	EFN69529	Ants	Camponotus floridanus	Ribonuclease Z, mitochondrial
	kmr23_comp71131_c0_seq1	2792	EFN62769	Ants	Camponotus floridanus	Cleft lip and palate transmembrane protein 1-like protein
	Ant-TAContig3794	2792	EFN70702	Ants	Camponotus floridanus	Large neutral amino acids transporter small subunit 2
	kmr23_comp33137_c1_seq1	2792	EFN72721	Ants	Camponotus floridanus	Vang-like protein 1
	kmr23_comp70565_c0_seq1	2791	EFN73527	Ants	Camponotus floridanus	Putative phospholipase B-like lamina ancestor
	kmr23_comp75230_c0_seq1	2784	EFN69546	Ants	Camponotus floridanus	Chondroitin sulfate synthase 2
	Ant-TAContig6791	2780	EFN61716	Ants	Camponotus floridanus	E3 ubiquitin-protein ligase MARCH2
	Ant-TAContig1615	2780	EFN73000	Ants	Camponotus floridanus	Williams-Beuren syndrome chromosomal region 16 protein-like protein
	kmr31_comp5554_c0_seq1	2779	E2A751	Ants	Camponotus floridanus	Protein phphatase 1 regulatory subunit 16A
	kmr23_comp50550_c1_seq1	2775	EGI65491	Ants	Acromyrmex echinatior	Putative adenylate kinase 7
	kmr27_comp88842_c2_seq7	2773	EFN65368	Ants	Camponotus floridanus	F-box only protein 28
	kmr23_comp72152_c0_seq1	2770	E2A1X6	Ants	Camponotus floridanus	Sodium/hydrogen exchanger
	Ant-TAContig4019	2769	EFN70682	Ants	Camponotus floridanus	Protein PAT1-like protein 1
	kmr23_comp48585_c1_seq1	2769	EFN69290	Ants	Camponotus floridanus	UPF0518 protein FAM160B1
	Ant-TAContig466	2768	EFN68258	Ants	Camponotus floridanus	Inositol-trisphosphate 3-kinase A
	Ant-TAContig701	2766	EFN64989	Ants	Camponotus floridanus	hypothetical protein EAG_08527
	kmr23_comp69890_c7_seq1	2766	EFN69609	Ants	Camponotus floridanus	STE20-like serine/threonine-protein kinase
	kmr29_comp91929_c3_seq1	2761	EFN70722	Ants	Camponotus floridanus	Histone-lysine N-methyltransferase, H3 lysine-79 specific
	Ant-TAContig22	2761	EFN69741	Ants	Camponotus floridanus	hypothetical protein EAG_12987
	kmr23_comp73264_c0_seq1	2760	EFN63844	Ants	Camponotus floridanus	DnaJ-like protein subfamily C member 2
	kmr25_comp41249_c0_seq1	2760	EFZ17792	Ants	Solenopsis invicta	hypothetical protein SINV_16040
	Ant-TAContig4541	2760	EFN64294	Ants	Camponotus floridanus	Iporin
	kmr25_comp84911_c0_seq5	2757	E2A0U9	Ants	Camponotus floridanus	Transient receptor potential cation channel CG34123
	Ant-TAContig2589	2756	EGI63615	Ants	Acromyrmex echinatior	Zinc finger protein 100
	Ant-TAContig870	2753	EFN66210	Ants	Camponotus floridanus	Cubilin
	kmr23_comp73175_c0_seq1	2750	EFN66047	Ants	Camponotus floridanus	Putative rRNA methyltransferase 3
	Ant-TAContig621	2743	EFN62409	Ants	Camponotus floridanus	Nucleoporin-like 2
	kmr27_comp81001_c0_seq1	2743	E2B7M1	Ants	Harathos saltator	Zinc finger protein Elbow (Fragment)
	kmr23_comp69105_c0_seq1	2742	EFN63514	Ants	Camponotus floridanus	Myosin-XV
	Ant-TAContig2828	2742	EFN68971	Ants	Camponotus floridanus	Nuclear cap-binding protein subunit 1
	kmr23_comp59589_c1_seq1	2740	EFN61444	Ants	Camponotus floridanus	hypothetical protein EAG_10820
	Ant-TAContig3244	2740	EFN62971	Ants	Camponotus floridanus	RING finger protein 165
	Ant-TAContig5146	2739	EFN69531	Ants	Camponotus floridanus	HEAT repeat-containing protein 2
	kmr25_comp83926_c0_seq1	2738	EFN67842	Ants	Camponotus floridanus	Insulin receptor substrate 1-B
	kmr23_comp34956_c0_seq1	2737	EFZ21197	Ants	Solenopsis invicta	hypothetical protein SINV_10966
	kmr25_comp85965_c7_seq1	2737	EFN71679	Ants	Camponotus floridanus	Papilin
	kmr25_comp84353_c1_seq1	2736	E2A4F5	Ants	Camponotus floridanus	RAB6IP1-like protein
	Ant-TAContig6398	2735	EFN61885	Ants	Camponotus floridanus	Bifunctional coenzyme A synthase
	kmr23_comp73770_c0_seq1	2733	EFN69721	Ants	Camponotus floridanus	Putative GTP-binding protein Parf
	Ant-TAContig710	2723	EFN66282	Ants	Camponotus floridanus	Ras-related protein Rab-35
	Ant-TAContig3884	2723	EGI66180	Ants	Acromyrmex echinatior	Transketolase-like protein 2
	Ant-TAContig6792	2722	EFN73101	Ants	Camponotus floridanus	N-acetyltransferase ESCO2
	kmr25_comp73057_c0_seq1	2721	E2AKL1	Ants	Camponotus floridanus	Calpain-7
	kmr31_comp620_c0_seq1	2717	E2AKV5	Ants	Camponotus floridanus	RING finger protein 10
	kmr23_comp77795_c0_seq1	2716	E2A0N5	Ants	Camponotus floridanus	NF-X1-type zinc finger protein NFXL1
	kmr23_comp74520_c0_seq1	2714	EFN62858	Ants	Camponotus floridanus	hypothetical protein EAG_08952
	kmr23_comp78777_c0_seq1	2712	EGI68148	Ants	Acromyrmex echinatior	hypothetical protein G5I_03244
	kmr29_comp94335_c0_seq1	2711	E2AGL5	Ants	Camponotus floridanus	Sorting nexin-14
	kmr23_comp72026_c0_seq1	2709	EFN63843	Ants	Camponotus floridanus	Rab11 family-interacting protein 1
	kmr23_comp86719_c0_seq1	2705	E2AB81	Ants	Camponotus floridanus	Putative uncharacterized protein
	kmr25_comp83500_c0_seq2	2704	EFN63894	Ants	Camponotus floridanus	Mannose-6-phosphate isomerase
	Ant-TAContig183	2704	EFN60820	Ants	Camponotus floridanus	RING and PHD-finger domain-containing protein KIAA1542
	Ant-TAContig3569	2704	EFN64763	Ants	Camponotus floridanus	Vacuolar ATP synthase subunit B
	kmr23_comp65513_c0_seq1	2702	EFN63500	Ants	Camponotus floridanus	Vacuolar protein sorting-associated protein 18-like protein
	Ant-TAContig1606	2701	EFN74811	Ants	Camponotus floridanus	Coiled-coil domain-containing protein 128
	Ant-TAContig2443	2699	EFN61542	Ants	Camponotus floridanus	UPF0630 protein KIAA0652-like protein
	Ant-TAContig5516	2698	EFN66245	Ants	Camponotus floridanus	Kanadaptin
	kmr23_comp60114_c0_seq1	2696	EFN66710	Ants	Camponotus floridanus	Transmembrane protein 62
	kmr29_comp90963_c0_seq2	2694	EFN67178	Ants	Camponotus floridanus	Unc-112-related protein
	kmr23_comp71871_c0_seq1	2693	EFN74066	Ants	Camponotus floridanus	Trifunctional enzyme subunit alpha, mitochondrial
	kmr27_comp87578_c0_seq1	2693	E2AGP7	Ants	Camponotus floridanus	U4/U6.U5 tri-snRNP-associated protein 1
	Ant-TAContig3310	2689	EGI60122	Ants	Acromyrmex echinatior	DnaJ-like protein subfamily C member 8
	Ant-TAContig7851	2687	EFZ20421	Ants	Solenopsis invicta	hypothetical protein SINV_07896
	kmr25_comp70644_c0_seq1	2686	E2A6W6	Ants	Camponotus floridanus	Putative uncharacterized protein (Fragment)
	kmr25_comp77000_c0_seq1	2686	E1ZW02	Ants	Camponotus floridanus	Ubiquitin carboxyl-terminal hydrolase 30
	Ant-TAContig3175	2682	EFN71365	Ants	Camponotus floridanus	Serine/threonine-protein phosphatase 4 regulatory subunit 1
	Ant-TAContig11872	2680	EFN65641	Ants	Camponotus floridanus	DNA replication licensing factor Mcm6
	kmr23_comp75955_c0_seq1	2678	EGI65587	Ants	Acromyrmex echinatior	hypothetical protein G5I_05979
	kmr23_comp57567_c0_seq1	2675	EFN62348	Ants	Camponotus floridanus	hypothetical protein EAG_01538
	kmr23_comp75018_c0_seq1	2675	EGI69223	Ants	Acromyrmex echinatior	Tyrosine-protein phosphatase non-receptor type 9
	kmr31_comp7222_c0_seq1	2674	E2AEF1	Ants	Camponotus floridanus	RAC serine/threonine-protein kinase
	Ant-TAContig899	2673	EGI63299	Ants	Acromyrmex echinatior	Histone-lysine N-methyltransferase trr
	kmr25_comp81615_c0_seq1	2670	E2AN68	Ants	Camponotus floridanus	Integral membrane protein GPR175
	kmr23_comp69520_c0_seq1	2669	EGI69527	Ants	Acromyrmex echinatior	Mitogen-activated protein kinase kinase kinase 9
	kmr23_comp73606_c0_seq1	2668	EFN69427	Ants	Camponotus floridanus	Serine/threonine-protein kinase PLK4
	kmr25_comp77637_c0_seq1	2668	EFN67979	Ants	Camponotus floridanus	Xaa-Pro aminopeptidase 1
	Ant-TAContig2390	2665	EFN73287	Ants	Camponotus floridanus	Coiled-coil domain-containing protein 102A
	kmr23_comp71911_c0_seq1	2664	E2A4P8	Ants	Camponotus floridanus	Serine protease snake
	Ant-TAContig5858	2663	EFN67578	Ants	Camponotus floridanus	Protein jagged-1
	kmr25_comp81672_c0_seq1	2663	E2AGH4	Ants	Camponotus floridanus	Putative uncharacterized protein
	kmr29_comp85598_c0_seq1	2663	EFN68420	Ants	Camponotus floridanus	Spindle assembly abnormal protein 6-like protein
	kmr27_comp57100_c0_seq1	2662	E9J778	Ants	Solenopsis invicta	Putative uncharacterized protein (Fragment)
	kmr23_comp75739_c0_seq1	2661	EFN61247	Ants	Camponotus floridanus	Zinc transporter 9
	Ant-TAContig5996	2658	EFN67846	Ants	Camponotus floridanus	Protein bowel
	Ant-TAContig3119	2656	EFN66909	Ants	Camponotus floridanus	Serine/threonine-protein phosphatase 2A 56 kDa regulatory subunit epsilon isoform
	Ant-TAContig772	2655	EFN64106	Ants	Camponotus floridanus	Pantothenate kinase 1
	kmr23_comp33723_c1_seq1	2652	EFN72983	Ants	Camponotus floridanus	Collagen type IV alpha-3-binding protein
	kmr29_comp85800_c0_seq1	2652	E2ABH5	Ants	Camponotus floridanus	Regulator of G-protein signaling 12
	kmr29_comp86224_c0_seq1	2649	EFN68325	Ants	Camponotus floridanus	Lymphoid-specific helicase
	Ant-TAContig3041	2648	EFN68507	Ants	Camponotus floridanus	Homeotic protein deformed
	kmr23_comp76019_c0_seq1	2647	EFN60932	Ants	Camponotus floridanus	cGMP-dependent 3',5'-cyclic phosphodiesterase
	kmr25_comp82482_c0_seq1	2646	E2AAG0	Ants	Camponotus floridanus	Putative uncharacterized protein
	Ant-TAContig325	2645	EFN71112	Ants	Camponotus floridanus	Cadherin-23
	kmr23_comp72821_c0_seq1	2645	EFN62967	Ants	Camponotus floridanus	Cell division cycle 5-related protein
	kmr25_comp84004_c2_seq10	2644	E2A9Q5	Ants	Camponotus floridanus	Putative uncharacterized protein
	kmr23_comp76478_c0_seq1	2642	EFN69145	Ants	Camponotus floridanus	Solute carrier organic anion transporter family member 4C1
	kmr23_comp70746_c0_seq1	2641	EFN64131	Ants	Camponotus floridanus	Membrane-associated progesterone receptor component 2
	kmr27_comp88382_c1_seq1	2640	EFZ22690	Ants	Solenopsis invicta	hypothetical protein SINV_08756
	kmr25_comp84503_c2_seq1	2640	E2B117	Ants	Camponotus floridanus	Putative uncharacterized protein
	Ant-TAContig3113	2639	EFN65022	Ants	Camponotus floridanus	cAMP-responsive element-binding protein 3-like protein 4
	kmr25_comp84792_c1_seq2	2639	EFN73942	Ants	Camponotus floridanus	Kyphoscoliosis peptidase
	kmr25_comp77197_c0_seq1	2639	EFN65396	Ants	Camponotus floridanus	Transferrin
	kmr25_comp78122_c0_seq1	2637	EFN68312	Ants	Camponotus floridanus	Lethal(2)neighbour of tid protein
	Ant-TAContig4004	2636	EFN71554	Ants	Camponotus floridanus	hypothetical protein EAG_14232
	kmr25_comp71931_c0_seq1	2636	EFN71941	Ants	Camponotus floridanus	Protein kinase C-binding protein 1
	Ant-TAContig10171	2635	EFN60410	Ants	Camponotus floridanus	R3H domain-containing protein 1
	kmr23_comp34519_c1_seq1	2632	EFN62948	Ants	Camponotus floridanus	Exportin-5
	kmr27_comp82180_c0_seq1	2631	E2ALC7	Ants	Camponotus floridanus	Integral membrane protein 2C
	kmr23_comp70663_c0_seq1	2630	EFN66877	Ants	Camponotus floridanus	Protein DGCR8
	Ant-TAContig7063	2624	EFN68147	Ants	Camponotus floridanus	Frizzled-4
	kmr23_comp72636_c0_seq1	2623	E2AAE7	Ants	Camponotus floridanus	Ls of heterozygity 12 chromomal region 1 protein-like protein
	Ant-TAContig3707	2622	EFN63999	Ants	Camponotus floridanus	Microtubule-associated serine/threonine-protein kinase-like
	kmr23_comp59902_c1_seq1	2621	EFN71127	Ants	Camponotus floridanus	7SK snRNA methylphosphate capping enzyme
	kmr23_comp57096_c0_seq1	2620	EFZ14062	Ants	Solenopsis invicta	hypothetical protein SINV_05147
	kmr23_comp70209_c14_seq1	2618	EGI61628	Ants	Acromyrmex echinatior	Down syndrome cell adhesion molecule-like protein
	kmr29_comp85639_c0_seq2	2614	E2AWE3	Ants	Camponotus floridanus	Basement membrane-specific heparan sulfate proteoglycan core protein
	Ant-TAContig3875	2614	EFN71831	Ants	Camponotus floridanus	Electron transfer flavoprotein-ubiquinone oxidoreductase, mitochondrial
	kmr27_comp91626_c3_seq3	2614	E1ZZF3	Ants	Camponotus floridanus	Serine palmitoyltransferase 2
	Ant-TAContig1785	2614	EFN70053	Ants	Camponotus floridanus	SMEK-like protein 1
	kmr31_comp2092_c0_seq1	2609	E2ACR0	Ants	Camponotus floridanus	Transcription factor TFIIIB component B''-like protein
	Ant-TAContig8	2607	EFN71553	Ants	Camponotus floridanus	hypothetical protein EAG_14231
	kmr25_comp39434_c0_seq1	2604	E2AHY1	Ants	Camponotus floridanus	DNA replication licensing factor Mcm2
	kmr27_comp55392_c0_seq1	2603	E2C163	Ants	Harathos saltator	Putative alpha-1,2-glucyltransferase ALG10-B
	Ant-TAContig6802	2601	EGI68155	Ants	Acromyrmex echinatior	hypothetical protein G5I_03251
	kmr27_comp88045_c1_seq1	2601	EFN71260	Ants	Camponotus floridanus	Tetratricopeptide repeat protein 27
	Ant-TAContig1324	2600	EFN62358	Ants	Camponotus floridanus	Down syndrome cell adhesion molecule
	kmr23_comp70625_c0_seq1	2598	E2AUP8	Ants	Camponotus floridanus	Exonuclease 3'-5' domain-like-containing protein 2
	kmr23_comp74186_c0_seq1	2596	EFN72377	Ants	Camponotus floridanus	Docking protein 2
	kmr23_comp37514_c0_seq1	2596	EFN61389	Ants	Camponotus floridanus	Importin-11
	kmr23_comp69332_c0_seq1	2595	E2C3M9	Ants	Harathos saltator	Hexokinase-2
	kmr23_comp73159_c0_seq1	2595	E2B0R7	Ants	Camponotus floridanus	Long-chain fatty acid transport protein 4
	Ant-TAContig7818	2594	EFN71565	Ants	Camponotus floridanus	Proton-coupled amino acid transporter 1
	kmr23_comp58534_c0_seq1	2593	EFN64762	Ants	Camponotus floridanus	DNA repair and recombination protein RAD54-like
	kmr23_comp51160_c2_seq1	2593	EFN74892	Ants	Camponotus floridanus	Protein APCDD1
	Ant-TAContig320	2590	EFN73928	Ants	Camponotus floridanus	Receptor expression-enhancing protein 5
	kmr25_comp83303_c0_seq1	2585	E2ADF2	Ants	Camponotus floridanus	Putative uncharacterized protein
	kmr29_comp94525_c1_seq2	2580	EFN67736	Ants	Camponotus floridanus	TBC1 domain family member 16
	kmr23_comp78909_c0_seq1	2579	EFN74826	Ants	Camponotus floridanus	Nose resistant to fluoxetine protein 6
	Ant-TAContig2356	2578	EFN72476	Ants	Camponotus floridanus	TWiK family of potassium channels protein 18
	kmr23_comp33006_c0_seq1	2578	EFN68061	Ants	Camponotus floridanus	WD repeat-containing protein 67
	kmr23_comp72931_c0_seq1	2577	EGI59991	Ants	Acromyrmex echinatior	Putative pre-mRNA-splicing factor ATP-dependent RNA helicase DHX15
	kmr25_comp81725_c1_seq2	2574	E2AMZ3	Ants	Camponotus floridanus	Extracellular sulfatase SULF-1-like protein
	kmr29_comp94425_c0_seq1	2574	E2A929	Ants	Camponotus floridanus	Probable elongator complex protein 2
	kmr23_comp74966_c0_seq1	2570	EFN74443	Ants	Camponotus floridanus	ATP-binding cassette sub-family B member 10, mitochondrial
	Ant-TAContig4059	2570	EFN65631	Ants	Camponotus floridanus	WD40 repeat-containing protein SMU1
	Ant-TAContig3395	2569	EFN73951	Ants	Camponotus floridanus	Neuroligin-1
	kmr23_comp72660_c0_seq1	2568	EFN62269	Ants	Camponotus floridanus	ATP-binding cassette sub-family A member 13
	kmr27_comp57906_c0_seq1	2568	EFZ11552	Ants	Solenopsis invicta	hypothetical protein SINV_04858
	kmr23_comp77486_c0_seq1	2567	EFN68967	Ants	Camponotus floridanus	ATP-binding cassette sub-family F member 3
	kmr23_comp59381_c0_seq1	2565	E2ADN6	Ants	Camponotus floridanus	Calcium release-activated calcium channel protein 1
	Ant-TAContig5941	2564	EFN69036	Ants	Camponotus floridanus	Nucleolar complex protein 3-like protein
	Ant-TAContig2288	2561	EFN67099	Ants	Camponotus floridanus	Succinyl-CoA ligase [ADP-forming] subunit beta, mitochondrial
	kmr29_comp95388_c0_seq13	2558	E2AA61	Ants	Camponotus floridanus	Dynamin
	Ant-TAContig4496	2557	EFN62889	Ants	Camponotus floridanus	Coiled-coil domain-containing protein MTMR15
	kmr29_comp94125_c0_seq1	2556	EFN66489	Ants	Camponotus floridanus	Sodium/potassium-transporting ATPase subunit beta-2
	kmr23_comp67389_c1_seq1	2554	EFN67042	Ants	Camponotus floridanus	Ethanolaminephosphotransferase 1
	Ant-TAContig4070	2554	EFN67164	Ants	Camponotus floridanus	Protein spitz
	kmr25_comp81983_c4_seq3	2552	F4WQV8	Ants	Acromyrmex echinatior	FERM, RhoGEF and pleckstrin domain-containing protein 1
	kmr25_comp72560_c0_seq1	2552	EFN67035	Ants	Camponotus floridanus	U4/U6 small nuclear ribonucleoprotein Prp31
	kmr23_comp74572_c0_seq1	2551	EFN71981	Ants	Camponotus floridanus	Putative ATP-dependent RNA helicase DHX33
	Ant-TAContig1464	2550	EFN65096	Ants	Camponotus floridanus	Protein FAM60A
	Ant-TAContig464	2546	EFN60649	Ants	Camponotus floridanus	Epidermal growth factor receptor kinase substrate 8
	kmr23_comp32997_c0_seq1	2543	EGI62434	Ants	Acromyrmex echinatior	Metal regulatory transcription factor 1
	Ant-TAContig227	2543	EFN67493	Ants	Camponotus floridanus	Phospholipase B1, membrane-associated
	Ant-TAContig806	2543	EFN61572	Ants	Camponotus floridanus	Zinc finger RAD18 domain-containing protein C1orf124
	kmr23_comp73863_c0_seq1	2542	EFN71602	Ants	Camponotus floridanus	ATP-dependent RNA helicase SUV3-like protein, mitochondrial
	Ant-TAContig4018	2540	EFN70745	Ants	Camponotus floridanus	15-hydroxyprostaglandin dehydrogenase [NAD+]
	kmr31_comp507_c0_seq1	2538	E2B080	Ants	Camponotus floridanus	Transmembrane protein 120-like protein
	kmr23_comp54731_c0_seq1	2537	EFN62192	Ants	Camponotus floridanus	L-lactate dehydrogenase
	kmr27_comp88305_c0_seq1	2533	E2AR35	Ants	Camponotus floridanus	Growth arrest-specific protein 8
	Ant-TAContig5121	2532	EFN72897	Ants	Camponotus floridanus	Transmembrane protein 145
	Ant-TAContig10154	2527	EFN63840	Ants	Camponotus floridanus	Guanine nucleotide-binding protein G(s) subunit alpha
	kmr23_comp52657_c1_seq1	2527	EFN63668	Ants	Camponotus floridanus	Regulatory-associated protein of mTOR
	Ant-TAContig2345	2526	EFN73387	Ants	Camponotus floridanus	Pre-mRNA-splicing factor ATP-dependent RNA helicase PRP16
	kmr23_comp71757_c0_seq1	2524	EFN74896	Ants	Camponotus floridanus	Selenium-binding protein 1-A
	kmr23_comp81133_c0_seq1	2524	EFN66455	Ants	Camponotus floridanus	Sperm flagellar protein 2
	kmr23_comp81596_c0_seq1	2523	E2ACB3	Ants	Camponotus floridanus	L-ascorbate oxidase
	kmr27_comp89884_c0_seq1	2521	E1ZXX5	Ants	Camponotus floridanus	Putative uncharacterized protein
	Ant-TAContig5940	2521	EFN60489	Ants	Camponotus floridanus	Uncharacterized protein C6orf103
	kmr31_comp5591_c0_seq1	2519	EFN67695	Ants	Camponotus floridanus	Glycyl-tRNA synthetase
	Ant-TAContig414	2515	EFN60470	Ants	Camponotus floridanus	Dipeptidyl-peptidase 3
	kmr25_comp80007_c0_seq1	2515	E1ZZ31	Ants	Camponotus floridanus	Vesicular glutamate transporter 1
	kmr23_comp74258_c0_seq1	2514	EFN74349	Ants	Camponotus floridanus	Mucolipin-3
	kmr23_comp74650_c0_seq1	2513	EFN73879	Ants	Camponotus floridanus	Uncharacterized protein C9orf82-like protein
	kmr23_comp68526_c0_seq1	2511	E2A3J4	Ants	Camponotus floridanus	G-protein coupled receptor Mth2
	kmr23_comp74811_c0_seq1	2511	EGI59227	Ants	Acromyrmex echinatior	Oligopeptidase A
	kmr23_comp72128_c0_seq1	2510	EFN60508	Ants	Camponotus floridanus	Stromal membrane-associated protein 1
	kmr25_comp78737_c1_seq1	2506	EFN62948	Ants	Camponotus floridanus	Exportin-5
	kmr23_comp75219_c0_seq1	2506	EFN69365	Ants	Camponotus floridanus	U4/U6 small nuclear ribonucleoprotein Prp3
	kmr23_comp34507_c0_seq1	2505	EFN62536	Ants	Camponotus floridanus	Cell division cycle protein 16-like protein
	kmr23_comp73803_c0_seq1	2502	EFN61320	Ants	Camponotus floridanus	Uncharacterized aarF domain-containing protein kinase 4
	kmr23_comp56000_c0_seq1	2502	EFN68245	Ants	Camponotus floridanus	Uncharacterized protein KIAA0241
	Ant-TAContig10237	2501	EGI70105	Ants	Acromyrmex echinatior	Insulin receptor substrate 1
	Ant-TAContig2254	2501	EGI63119	Ants	Acromyrmex echinatior	Programmed cell death protein 7
	Ant-TAContig3994	2499	EFN68422	Ants	Camponotus floridanus	Serine/threonine-protein kinase PLK2
	kmr25_comp79774_c1_seq1	2497	E2AKG1	Ants	Camponotus floridanus	Hamartin
	kmr23_comp74497_c0_seq1	2497	EFN74154	Ants	Camponotus floridanus	Probable cleavage and polyadenylation specificity factor subunit 2
	kmr23_comp74285_c0_seq1	2496	E2A6J8	Ants	Camponotus floridanus	Craniofacial development protein 1
	kmr23_comp73260_c0_seq1	2495	EFN66779	Ants	Camponotus floridanus	ESF1-like protein
	Ant-TAContig467	2494	EFN67034	Ants	Camponotus floridanus	hypothetical protein EAG_04327
	kmr23_comp71476_c0_seq1	2493	E2A3R3	Ants	Camponotus floridanus	Adenylhomocysteinase
	kmr23_comp74291_c0_seq1	2492	EGI66059	Ants	Acromyrmex echinatior	Uncharacterized protein KIAA2013-like protein
	kmr23_comp76501_c0_seq1	2486	EFN67898	Ants	Camponotus floridanus	WD repeat-containing protein SAZD
	Ant-TAContig4499	2482	EFN60325	Ants	Camponotus floridanus	Cytochrome P450 4g15
	kmr27_comp87142_c1_seq3	2482	EGI63315	Ants	Acromyrmex echinatior	hypothetical protein G5I_08344
	kmr23_comp70395_c0_seq1	2481	EFN69064	Ants	Camponotus floridanus	ATP synthase subunit beta, mitochondrial
	kmr27_comp87514_c0_seq1	2481	E1ZZB9	Ants	Camponotus floridanus	Putative uncharacterized protein
	Ant-TAContig6399	2474	EFN73367	Ants	Camponotus floridanus	Uncharacterized protein C17orf85
	kmr25_comp85271_c0_seq1	2473	EFN61887	Ants	Camponotus floridanus	Double-stranded RNA-specific editase Adar
	Ant-TAContig2876	2471	EFN73604	Ants	Camponotus floridanus	Ecdysteroid UDP-glucosyltransferase
	Ant-TAContig11733	2470	EFN68197	Ants	Camponotus floridanus	Tubulin-specific chaperone cofactor E-like protein
	kmr23_comp73471_c0_seq1	2469	EGI59755	Ants	Acromyrmex echinatior	UDP-glucuronosyltransferase 2C1
	kmr25_comp85215_c0_seq1	2468	EFN74798	Ants	Camponotus floridanus	hypothetical protein EAG_05105
	Ant-TAContig5015	2468	EFN73102	Ants	Camponotus floridanus	Probable ATP-dependent RNA helicase DDX43
	kmr23_comp76812_c0_seq1	2465	EGI66895	Ants	Acromyrmex echinatior	Annulin
	Ant-TAContig3227	2465	EFN80623	Ants	Harpegnathos saltator	Probable dolichyl pyrophosphate Glc1Man9GlcNAc2 alpha-1,3-glucosyltransferase
	Ant-TAContig2388	2465	EFN74209	Ants	Camponotus floridanus	Probable nucleoporin Nup54
	kmr23_comp68679_c1_seq1	2463	EFN73100	Ants	Camponotus floridanus	ADAM 17-like protease
	kmr25_comp83115_c2_seq2	2460	E2ARP5	Ants	Camponotus floridanus	Serine protease snake
	Ant-TAContig3804	2450	EFN69016	Ants	Camponotus floridanus	Adenosine 3'-phospho 5'-phosphosulfate transporter 1
	Ant-TAContig6428	2447	EFN61948	Ants	Camponotus floridanus	PHD finger protein 12
	kmr29_comp95407_c2_seq6	2445	EFN69822	Ants	Camponotus floridanus	WD repeat-containing protein mio-B
	kmr23_comp70864_c0_seq1	2441	E2ARW9	Ants	Camponotus floridanus	Nucleolar protein 5A
	Ant-TAContig5050	2438	EFN71938	Ants	Camponotus floridanus	Conserved oligomeric Golgi complex subunit 5
	kmr23_comp76310_c0_seq1	2435	EFN69821	Ants	Camponotus floridanus	Phosphorylated CTD-interacting factor 1
	kmr23_comp84309_c0_seq1	2432	EFN71549	Ants	Camponotus floridanus	FERM and PDZ domain-containing protein 2
	Ant-TAContig234	2431	EFN61172	Ants	Camponotus floridanus	MutS protein-like protein 5
	kmr23_comp72120_c0_seq1	2431	EFN60966	Ants	Camponotus floridanus	TBC1 domain family member 23
	Ant-TAContig753	2429	EFN88439	Ants	Harpegnathos saltator	hypothetical protein EAI_01367
	Ant-TAContig5049	2428	EFN64343	Ants	Camponotus floridanus	Dynein intermediate chain 3, ciliary
	kmr23_comp74039_c0_seq1	2427	E2AXJ2	Ants	Camponotus floridanus	Putative uncharacterized protein
	kmr27_comp41683_c0_seq1	2426	EFN71510	Ants	Camponotus floridanus	Transcription initiation factor TFIID subunit 6
	kmr29_comp86095_c0_seq1	2425	E2A6L5	Ants	Camponotus floridanus	Sequestome-1
	kmr23_comp34418_c1_seq1	2424	EFN61078	Ants	Camponotus floridanus	Kinesin-like protein KIF23
	kmr23_comp76940_c0_seq1	2423	EFN72701	Ants	Camponotus floridanus	C2 domain-containing protein 3
	kmr25_comp85411_c2_seq4	2422	E2AA27	Ants	Camponotus floridanus	Tyrine-protein phphatase non-receptor type 13
	kmr23_comp81629_c0_seq1	2421	EFN72151	Ants	Camponotus floridanus	Ammonium transporter 1 member 4
	kmr27_comp81778_c1_seq1	2421	EFN69060	Ants	Camponotus floridanus	Tyrosyl-tRNA synthetase, cytoplasmic
	Ant-TAContig6003	2417	EFZ21260	Ants	Solenopsis invicta	hypothetical protein SINV_05156
	kmr23_comp34465_c1_seq1	2415	EFN63723	Ants	Camponotus floridanus	Disheveled-associated activator of morphogenesis 1
	kmr23_comp34698_c1_seq1	2411	E2AFX1	Ants	Camponotus floridanus	Uncharacterized protein C20orf54
	kmr25_comp61825_c0_seq1	2409	E2AAJ4	Ants	Camponotus floridanus	Pin2-interacting protein X1
	kmr23_comp73880_c0_seq1	2408	EFN65825	Ants	Camponotus floridanus	DNA replication licensing factor mcm7-B
	kmr31_comp3647_c0_seq1	2406	EFN72366	Ants	Camponotus floridanus	Ribosomal RNA processing protein 1-like protein
	kmr23_comp46330_c0_seq1	2405	EGI70485	Ants	Acromyrmex echinatior	Synaptic vesicle glycoprotein 2B
	kmr29_comp85818_c0_seq1	2404	EFN72769	Ants	Camponotus floridanus	hypothetical protein EAG_06129
	kmr23_comp72581_c0_seq1	2404	EFN64393	Ants	Camponotus floridanus	Probable ATP-dependent RNA helicase DDX27
	Ant-TAContig3803	2403	EFN67396	Ants	Camponotus floridanus	F-box only protein 21
	kmr31_comp2639_c0_seq1	2399	EFN68086	Ants	Camponotus floridanus	Integrator complex subunit 10
	kmr23_comp73453_c0_seq1	2398	EFN64755	Ants	Camponotus floridanus	Protein PTCD3-like protein, mitochondrial
	kmr27_comp87301_c0_seq1	2397	E2A727	Ants	Camponotus floridanus	Mismatch repair endonuclease PMS2
	kmr23_comp75288_c0_seq1	2396	EFN61694	Ants	Camponotus floridanus	BTB/POZ domain-containing protein 2
	kmr27_comp84607_c1_seq1	2396	EFN69575	Ants	Camponotus floridanus	Protein DGCR14-like protein
	kmr23_comp37757_c1_seq1	2395	EFN61913	Ants	Camponotus floridanus	Centrosomal protein of 290 kDa
	kmr25_comp83097_c2_seq1	2395	EFN72023	Ants	Camponotus floridanus	hypothetical protein EAG_13974
	kmr23_comp68014_c1_seq1	2391	EFN65650	Ants	Camponotus floridanus	Uncharacterized protein KIAA1843
	kmr29_comp83552_c0_seq1	2388	EFN68446	Ants	Camponotus floridanus	1,4-alpha-glucan-branching enzyme
	kmr23_comp71593_c0_seq1	2387	EFN70010	Ants	Camponotus floridanus	Lipase 3
	kmr25_comp83430_c2_seq2	2386	E2AV84	Ants	Camponotus floridanus	Serine protease easter
	kmr23_comp71025_c0_seq1	2384	E9IGS4	Ants	Solenopsis invicta	Putative uncharacterized protein (Fragment)
	Ant-TAContig7848	2383	EFN63282	Ants	Camponotus floridanus	Macrophage erythroblast attacher
	kmr25_comp80080_c0_seq1	2380	E2AT09	Ants	Camponotus floridanus	Glutamate [NMDA] receptor-associated protein 1
	kmr23_comp52382_c0_seq1	2378	EFN66074	Ants	Camponotus floridanus	Coiled-coil and C2 domain-containing protein 2A
	kmr23_comp70617_c0_seq1	2378	EFN74941	Ants	Camponotus floridanus	hypothetical protein EAG_09461
	Ant-TAContig593	2375	EFN62901	Ants	Camponotus floridanus	Malate dehydrogenase
	kmr23_comp72458_c0_seq1	2374	EFN68666	Ants	Camponotus floridanus	Signal recognition particle 72 kDa protein
	kmr23_comp74251_c0_seq1	2373	EFZ09993	Ants	Solenopsis invicta	hypothetical protein SINV_04903
	kmr25_comp79002_c0_seq1	2373	EGI59105	Ants	Acromyrmex echinatior	Uncharacterized protein C19orf29
	Ant-TAContig5614	2371	EGI66497	Ants	Acromyrmex echinatior	Glyceraldehyde-3-phosphate dehydrogenase 2
	kmr23_comp35375_c1_seq1	2367	EFN68805	Ants	Camponotus floridanus	hypothetical protein EAG_15885
	kmr23_comp56352_c0_seq1	2366	EFN70624	Ants	Camponotus floridanus	Actin-like protein 13E
	Ant-TAContig4617	2366	EFN66251	Ants	Camponotus floridanus	Ras-related protein Rab-3
	Ant-TAContig6405	2366	EFN61721	Ants	Camponotus floridanus	Syntaxin-5
	kmr23_comp71463_c0_seq1	2366	EFN63618	Ants	Camponotus floridanus	UBX domain-containing protein 2
	kmr25_comp63203_c0_seq1	2364	EFN60528	Ants	Camponotus floridanus	Malate dehydrogenase, cytoplasmic
	Ant-TAContig446	2362	EFN61235	Ants	Camponotus floridanus	Insulin
	kmr23_comp77241_c0_seq1	2361	E2ABV9	Ants	Camponotus floridanus	Cell division control protein 6-like protein
	Ant-TAContig4200	2361	EFN64086	Ants	Camponotus floridanus	Pseudouridylate synthase 7-like protein
	kmr25_comp82406_c1_seq1	2359	E2AIY1	Ants	Camponotus floridanus	Kinesin-like protein KIF16B
	kmr23_comp73486_c0_seq1	2356	EFN75019	Ants	Camponotus floridanus	Protein MAK10-like protein
	kmr23_comp71188_c0_seq1	2355	EFN69560	Ants	Camponotus floridanus	GTP cyclohydrolase 1
	kmr23_comp72840_c0_seq1	2355	EFN63214	Ants	Camponotus floridanus	hypothetical protein EAG_15199
	kmr23_comp33962_c0_seq1	2353	EFN74172	Ants	Camponotus floridanus	Eukaryotic initiation factor 4A-II
	kmr25_comp84337_c0_seq1	2353	E1ZZT6	Ants	Camponotus floridanus	Protein DDI1-like protein 2
	kmr29_comp95205_c1_seq6	2350	EFN65061	Ants	Camponotus floridanus	N-acetylglucosamine-6-sulfatase
	kmr23_comp70145_c80_seq1	2348	EFN66046	Ants	Camponotus floridanus	Nuclear hormone receptor E75
	kmr25_comp85161_c7_seq8	2347	E2A1C1	Ants	Camponotus floridanus	Group XIIA secretory phpholipase A2
	kmr23_comp50277_c0_seq1	2347	EFN72998	Ants	Camponotus floridanus	hypothetical protein EAG_11290
	kmr23_comp78164_c0_seq1	2347	EFN73833	Ants	Camponotus floridanus	Protein RCC2-like protein
	kmr25_comp80171_c1_seq1	2346	EGI66585	Ants	Acromyrmex echinatior	Putative ubiquitin-conjugating enzyme E2 W
	kmr23_comp75139_c0_seq1	2343	EFN65549	Ants	Camponotus floridanus	Maternal embryonic leucine zipper kinase
	Ant-TAContig2832	2341	EFN70526	Ants	Camponotus floridanus	NADH dehydrogenase [ubiquinone] iron-sulfur protein 2, mitochondrial
	Ant-TAContig4052	2337	EFN68737	Ants	Camponotus floridanus	Cubilin
	kmr31_comp8475_c0_seq1	2335	EGI59522	Ants	Acromyrmex echinatior	RING finger protein 160
	kmr23_comp37877_c0_seq1	2333	EFN70019	Ants	Camponotus floridanus	Uncharacterized protein C18orf51
	kmr23_comp72006_c0_seq1	2332	EFN62758	Ants	Camponotus floridanus	Tubulin polyglutamylase TTLL4
	kmr27_comp87200_c0_seq1	2331	EFN67483	Ants	Camponotus floridanus	SPARC
	kmr23_comp33080_c0_seq1	2330	EFN72117	Ants	Camponotus floridanus	hypothetical protein EAG_05499
	Ant-TAContig1772	2328	EFN73936	Ants	Camponotus floridanus	hypothetical protein EAG_11875
	kmr23_comp74066_c0_seq1	2326	E2ACV1	Ants	Camponotus floridanus	2',5'-phphodiesterase 12
	kmr23_comp68561_c7_seq1	2326	EFN63918	Ants	Camponotus floridanus	hypothetical protein EAG_03014
	kmr23_comp69493_c5_seq1	2323	EFN62277	Ants	Camponotus floridanus	tRNA 2-thiocytidine biosynthesis protein ttcA
	kmr29_comp58278_c0_seq1	2320	EFN70353	Ants	Camponotus floridanus	Zinc finger protein 227
	kmr23_comp73623_c0_seq1	2319	EFN74926	Ants	Camponotus floridanus	SWI/SNF-related matrix-associated actin-dependent regulator of chromatin subfamily A-like protein 1
	kmr23_comp72235_c0_seq1	2317	EFN61321	Ants	Camponotus floridanus	Homocysteine-responsive endoplasmic reticulum-resident ubiquitin-like domain member 2 protein
	kmr23_comp71291_c0_seq1	2317	EFN68215	Ants	Camponotus floridanus	hypothetical protein EAG_13126
	Ant-TAContig4463	2317	EFN64718	Ants	Camponotus floridanus	X-box-binding protein 1
	kmr23_comp67552_c0_seq1	2316	EFN68430	Ants	Camponotus floridanus	Plasminogen activator inhibitor 1 RNA-binding protein
	Ant-TAContig5590	2314	EFN74934	Ants	Camponotus floridanus	Protein downstream neighbor of son-like protein
	kmr27_comp84865_c0_seq1	2313	E2A9C8	Ants	Camponotus floridanus	Menin
	Ant-TAContig6759	2311	EFN72513	Ants	Camponotus floridanus	Bifunctional purine biosynthesis protein PURH
	Ant-TAContig3842	2311	EFN69848	Ants	Camponotus floridanus	Insulin-like growth factor-binding protein complex acid labile chain
	kmr23_comp72345_c0_seq1	2311	EFN72273	Ants	Camponotus floridanus	Phosphopantothenoylcysteine decarboxylase
	kmr23_comp71823_c0_seq1	2310	EFN69714	Ants	Camponotus floridanus	Homogentisate 1,2-dioxygenase
	kmr23_comp34535_c0_seq1	2310	EFN61812	Ants	Camponotus floridanus	Major royal jelly protein 1
	kmr23_comp74753_c0_seq1	2310	EFN63113	Ants	Camponotus floridanus	Parafibromin
	kmr25_comp39249_c0_seq1	2308	EFN62463	Ants	Camponotus floridanus	Minor histocompatibility antigen H13
	kmr27_comp90758_c0_seq1	2308	EFN64128	Ants	Camponotus floridanus	Probable nucleolar GTP-binding protein 1
	kmr29_comp79414_c0_seq1	2306	EFN66723	Ants	Camponotus floridanus	Mitotic spindle assembly checkpoint protein MAD1
	kmr23_comp33764_c0_seq1	2305	E1ZYY8	Ants	Camponotus floridanus	Sialin
	kmr25_comp61712_c0_seq1	2304	E1ZZD8	Ants	Camponotus floridanus	Putative uncharacterized protein
	Ant-TAContig3483	2304	EFN62118	Ants	Camponotus floridanus	Serendipity locus protein alpha
	Ant-TAContig3389	2303	EFN68373	Ants	Camponotus floridanus	Ubiquitin-conjugating enzyme E2 S
	kmr29_comp92030_c8_seq1	2302	E2ABX8	Ants	Camponotus floridanus	Putative uncharacterized protein
	kmr23_comp74201_c0_seq1	2301	EFN72514	Ants	Camponotus floridanus	Nucleoporin NUP85
	Ant-TAContig4163	2300	EGI57312	Ants	Acromyrmex echinatior	E3 ubiquitin-protein ligase RNF14
	kmr29_comp96939_c0_seq2	2297	EGI57738	Ants	Acromyrmex echinatior	CAD protein
	kmr23_comp63958_c0_seq1	2296	EFZ15189	Ants	Solenopsis invicta	hypothetical protein SINV_01971
	kmr23_comp73923_c0_seq1	2295	EFN74017	Ants	Camponotus floridanus	hypothetical protein EAG_14601
	kmr23_comp74868_c0_seq1	2295	EFN72373	Ants	Camponotus floridanus	Integral membrane protein DGCR2/IDD
	Ant-TAContig6920	2293	EFN67015	Ants	Camponotus floridanus	Protein tramtrack, alpha isoform
	kmr23_comp33642_c0_seq1	2293	EFN63141	Ants	Camponotus floridanus	SET and MYND domain-containing protein 4
	kmr27_comp90083_c0_seq12	2288	EFN72024	Ants	Camponotus floridanus	Hepatic leukemia factor
	Ant-TAContig6770	2288	EFN70888	Ants	Camponotus floridanus	hypothetical protein EAG_05637
	Ant-TAContig3512	2287	EFN66651	Ants	Camponotus floridanus	45 kDa calcium-binding protein
	kmr25_comp61928_c0_seq1	2284	EFN74779	Ants	Camponotus floridanus	UBX domain-containing protein 1
	kmr23_comp68197_c0_seq1	2283	EFN61387	Ants	Camponotus floridanus	hypothetical protein EAG_15342
	kmr27_comp82226_c0_seq1	2279	EFN74668	Ants	Camponotus floridanus	Rab5 GDP/GTP exchange factor
	kmr31_comp2749_c0_seq1	2279	E2AT97	Ants	Camponotus floridanus	Serine/threonine-protein kinase RIO1
	kmr27_comp88691_c0_seq1	2277	EFN69133	Ants	Camponotus floridanus	Tyrosine-protein kinase Dnt
	kmr23_comp55109_c0_seq1	2275	EFN70154	Ants	Camponotus floridanus	Alpha-glucosidase
	kmr23_comp75192_c0_seq1	2275	E2AV87	Ants	Camponotus floridanus	Ataxin-7-like protein 3
	kmr23_comp69034_c0_seq1	2274	EFN63530	Ants	Camponotus floridanus	Discoidin domain-containing receptor 2
	kmr27_comp90973_c4_seq1	2274	EFN64403	Ants	Camponotus floridanus	UNC93-like protein
	Ant-TAContig5266	2272	EFN72602	Ants	Camponotus floridanus	Cytosolic non-specific dipeptidase
	Ant-TAContig4449	2272	EGI68079	Ants	Acromyrmex echinatior	Nuclear pore complex protein Nup88
	kmr27_comp88680_c0_seq1	2269	E2AAU9	Ants	Camponotus floridanus	Cytochrome P450 6k1
	Ant-TAContig3473	2269	EFN61377	Ants	Camponotus floridanus	Fatty acyl-CoA reductase 1
	Ant-TAContig11717	2267	EFN63377	Ants	Camponotus floridanus	Serine-threonine kinase receptor-associated protein
	kmr27_comp90244_c8_seq1	2264	EFN70439	Ants	Camponotus floridanus	Glutamate [NMDA] receptor subunit 3A
	kmr27_comp89800_c1_seq7	2262	EFN60401	Ants	Camponotus floridanus	Malonyl-CoA decarboxylase, mitochondrial
	kmr25_comp79323_c0_seq1	2261	EFN72627	Ants	Camponotus floridanus	Arylsulfatase B
	Ant-TAContig1912	2258	EFN74334	Ants	Camponotus floridanus	Chymotrypsin-2
	Ant-TAContig6454	2257	EFN62008	Ants	Camponotus floridanus	N-acetylgalactosaminyltransferase 7
	kmr25_comp60988_c0_seq1	2255	E2A1G4	Ants	Camponotus floridanus	Cell death activator CIDE-B
	kmr25_comp71689_c0_seq1	2255	E1ZW85	Ants	Camponotus floridanus	Putative methyltransferase KIAA0859-like protein
	Ant-TAContig6468	2254	EFN71252	Ants	Camponotus floridanus	Pyridine nucleotide-disulfide oxidoreductase domain-containing protein 1
	kmr25_comp77683_c0_seq1	2252	EFN69774	Ants	Camponotus floridanus	Small glutamine-rich tetratricopeptide repeat-containing protein alpha
	kmr25_comp64913_c0_seq1	2251	E2AD28	Ants	Camponotus floridanus	Aspartate aminotransferase
	kmr23_comp74036_c0_seq1	2248	EFN61656	Ants	Camponotus floridanus	Arginyl-tRNA synthetase, cytoplasmic
	kmr27_comp80042_c0_seq1	2243	E1ZZ85	Ants	Camponotus floridanus	Beta-1,4-mannyltransferase egh
	kmr25_comp56064_c0_seq1	2241	E2AH44	Ants	Camponotus floridanus	Putative uncharacterized protein
	kmr23_comp72702_c0_seq1	2240	EFN74421	Ants	Camponotus floridanus	hypothetical protein EAG_08875
	Ant-TAContig2553	2238	EFN71935	Ants	Camponotus floridanus	Polypeptide N-acetylgalactosaminyltransferase 35A
	Ant-TAContig295	2237	EFN60264	Ants	Camponotus floridanus	Fukutin-related protein
	kmr29_comp94788_c2_seq1	2237	EFN69573	Ants	Camponotus floridanus	T-box transcription factor TBX1
	Ant-TAContig3388	2236	EFN70725	Ants	Camponotus floridanus	Cysteine-rich protein 2-binding protein
	Ant-TAContig2940	2233	EFN69320	Ants	Camponotus floridanus	Cuticlin-1
	Ant-TAContig210	2233	EFN66922	Ants	Camponotus floridanus	Nef-associated protein 1
	Ant-TAContig11860	2228	EFN68459	Ants	Camponotus floridanus	hypothetical protein EAG_10432
	kmr27_comp81508_c2_seq1	2227	EFN66497	Ants	Camponotus floridanus	Adapter molecule Crk
	kmr23_comp68983_c0_seq1	2227	EFN62091	Ants	Camponotus floridanus	Chorion peroxidase
	kmr23_comp71122_c0_seq1	2227	EGI68312	Ants	Acromyrmex echinatior	Pescadillo-like protein
	kmr31_comp8163_c0_seq1	2227	EFN74694	Ants	Camponotus floridanus	Rho GTPase-activating protein 1
	kmr25_comp84114_c4_seq4	2225	E9IDJ3	Ants	Solenopsis invicta	Putative uncharacterized protein (Fragment)
	kmr23_comp72673_c0_seq1	2224	EFN62990	Ants	Camponotus floridanus	SSXT protein
	kmr23_comp34857_c0_seq1	2224	EGI67587	Ants	Acromyrmex echinatior	Zinc finger protein 778
	Ant-TAContig5457	2223	EFN74526	Ants	Camponotus floridanus	hypothetical protein EAG_05988
	kmr29_comp94006_c0_seq1	2222	EFN72565	Ants	Camponotus floridanus	Neurotrimin
	kmr23_comp71616_c0_seq1	2221	EFN64764	Ants	Camponotus floridanus	4-hydroxybutyrate coenzyme A transferase
	kmr29_comp94677_c5_seq4	2218	E1ZVF3	Ants	Camponotus floridanus	G/T mismatch-specific thymine DNA glycylase
	kmr27_comp86982_c0_seq1	2217	E2A0K9	Ants	Camponotus floridanus	Broad-complex core protein isoform 6
	kmr27_comp91569_c3_seq7	2216	E2AVB6	Ants	Camponotus floridanus	Nucleide diphphate-linked moiety X motif 18
	kmr23_comp75161_c0_seq1	2216	EFN69487	Ants	Camponotus floridanus	U3 small nucleolar RNA-associated protein 6-like protein
	kmr23_comp75140_c0_seq1	2215	EFN73278	Ants	Camponotus floridanus	Islet cell autoantigen 1
	kmr23_comp71746_c0_seq1	2213	EFZ15795	Ants	Solenopsis invicta	hypothetical protein SINV_08663
	kmr23_comp70553_c0_seq1	2213	E2ARQ8	Ants	Camponotus floridanus	Prefoldin subunit 3
	Ant-TAContig5869	2213	EFN61888	Ants	Camponotus floridanus	WW domain-binding protein 11
	kmr23_comp57349_c0_seq1	2211	E9I9T4	Ants	Solenopsis invicta	Putative uncharacterized protein (Fragment)
	kmr27_comp91255_c0_seq3	2207	E2AYJ3	Ants	Camponotus floridanus	Aryl hydrocarbon receptor nuclear translocator-like protein
	kmr29_comp88230_c0_seq1	2204	E2AD81	Ants	Camponotus floridanus	Gephyrin
	Ant-TAContig2575	2202	EFN63944	Ants	Camponotus floridanus	Protein notum-like protein
	kmr23_comp72466_c0_seq1	2200	EFN73434	Ants	Camponotus floridanus	Differentially expressed in FDCP 6-like protein
	Ant-TAContig4017	2200	EFN73437	Ants	Camponotus floridanus	Importin subunit alpha-2
	Ant-TAContig3372	2199	EGI68656	Ants	Acromyrmex echinatior	hypothetical protein G5I_02660
	kmr23_comp33694_c1_seq1	2199	EFN66814	Ants	Camponotus floridanus	Probable splicing factor, arginine/serine-rich 7
	Ant-TAContig3808	2198	EGI70111	Ants	Acromyrmex echinatior	Uroporphyrinogen decarboxylase
	kmr23_comp68710_c1_seq1	2197	EFN63981	Ants	Camponotus floridanus	E3 SUMO-protein ligase RanBP2
	Ant-TAContig5730	2196	EFN63037	Ants	Camponotus floridanus	hypothetical protein EAG_05741
	kmr29_comp49886_c0_seq1	2194	EFN64486	Ants	Camponotus floridanus	Profilin
	kmr23_comp71588_c0_seq1	2194	EFN66284	Ants	Camponotus floridanus	Sorting nexin-2
	kmr27_comp81520_c0_seq2	2192	EFN61974	Ants	Camponotus floridanus	Cytoplasmic protein NCK1
	Ant-TAContig3588	2192	EFZ13021	Ants	Solenopsis invicta	hypothetical protein SINV_16352
	kmr23_comp32954_c0_seq1	2192	E2AIZ2	Ants	Camponotus floridanus	WD repeat-containing protein 92
	kmr23_comp72245_c0_seq1	2191	EFN64793	Ants	Camponotus floridanus	Acyl-CoA-binding domain-containing protein 5
	Ant-TAContig5464	2191	EFN71988	Ants	Camponotus floridanus	Cysteine-rich hydrophobic domain 2 protein
	kmr25_comp79146_c0_seq1	2191	EGI58302	Ants	Acromyrmex echinatior	SH3 domain-binding protein 5-like protein
	Ant-TAContig4247	2190	EFN66862	Ants	Camponotus floridanus	Endochitinase
	kmr29_comp55653_c0_seq1	2189	E2AX50	Ants	Camponotus floridanus	G2/mitotic-specific cyclin-B
	Ant-TAContig6216	2189	EFN76143	Ants	Harpegnathos saltator	Orexin receptor type 2
	kmr29_comp93271_c1_seq1	2189	EFN69024	Ants	Camponotus floridanus	Transcription initiation factor TFIID subunit 1
	kmr25_comp73024_c0_seq1	2188	E2A7S4	Ants	Camponotus floridanus	Pumilio domain-containing protein KIAA0020-like protein
	kmr25_comp86804_c0_seq1	2188	E2BDN2	Ants	Harathos saltator	Ubiquitin carboxyl-terminal hydrolase
	kmr29_comp91323_c0_seq1	2187	E2A4D9	Ants	Camponotus floridanus	ATP-dependent DNA helicase 2 subunit 1
	Ant-TAContig5057	2186	EFN69039	Ants	Camponotus floridanus	Gamma-glutamyltranspeptidase 1
	Ant-TAContig5796	2184	EFN73035	Ants	Camponotus floridanus	Eukaryotic translation initiation factor 2-alpha kinase 1
	kmr23_comp38211_c0_seq1	2183	EFN68894	Ants	Camponotus floridanus	hypothetical protein EAG_03471
	kmr27_comp86107_c0_seq4	2183	E2AHS8	Ants	Camponotus floridanus	Serine/threonine-protein kinase DCLK2
	Ant-TAContig5262	2182	EGI58274	Ants	Acromyrmex echinatior	DC-STAMP domain-containing protein 2
	kmr25_comp81992_c1_seq1	2182	EFN61231	Ants	Camponotus floridanus	Double-strand break repair protein MRE11A
	kmr25_comp80918_c0_seq1	2181	E2AZ50	Ants	Camponotus floridanus	FERM domain-containing protein 4A
	kmr27_comp86910_c1_seq1	2180	EFN69182	Ants	Camponotus floridanus	Equilibrative nucleoside transporter 4
	kmr23_comp68607_c3_seq1	2179	E2AS69	Ants	Camponotus floridanus	Serine-enriched protein
	Ant-TAContig6484	2175	EFN67950	Ants	Camponotus floridanus	Breast cancer anti-estrogen resistance protein 3
	kmr23_comp74265_c0_seq1	2175	EFN66661	Ants	Camponotus floridanus	Nicalin-1
	kmr29_comp49847_c0_seq1	2175	F4WTC9	Ants	Acromyrmex echinatior	Tetraspanin-11
	Ant-TAContig6771	2174	EFN71867	Ants	Camponotus floridanus	Eukaryotic translation initiation factor 2A
	kmr25_comp64051_c0_seq1	2174	EGI63361	Ants	Acromyrmex echinatior	Fatty-acid amide hydrolase 2
	kmr25_comp85739_c2_seq25	2174	E9ISM2	Ants	Solenopsis invicta	Putative uncharacterized protein (Fragment)
	kmr25_comp39311_c0_seq1	2173	EFN70895	Ants	Camponotus floridanus	Protein extra bases
	kmr23_comp34520_c0_seq1	2172	EFN63018	Ants	Camponotus floridanus	UDP-glucose 6-dehydrogenase
	kmr23_comp72296_c0_seq1	2172	EFN67901	Ants	Camponotus floridanus	Zinc finger protein 294
	Ant-TAContig1207	2171	EFN69616	Ants	Camponotus floridanus	hypothetical protein EAG_11660
	kmr25_comp85306_c0_seq2	2169	E2B176	Ants	Camponotus floridanus	Alpha-tocopherol transfer protein-like (Fragment)
	kmr27_comp90932_c0_seq7	2165	E1ZW92	Ants	Camponotus floridanus	Tetratricopeptide repeat protein 14
	kmr23_comp70474_c0_seq1	2164	EFN60812	Ants	Camponotus floridanus	hypothetical protein EAG_12136
	kmr23_comp75241_c0_seq1	2163	EFN68882	Ants	Camponotus floridanus	hypothetical protein EAG_00678
	kmr23_comp56621_c2_seq1	2163	E2AWJ5	Ants	Camponotus floridanus	Protein arginine N-methyltransferase 5
	kmr23_comp73461_c0_seq1	2162	EFN69681	Ants	Camponotus floridanus	Luciferin 4-monooxygenase
	kmr25_comp80574_c0_seq1	2161	EFN62243	Ants	Camponotus floridanus	Basement membrane-specific heparan sulfate proteoglycan core protein
	Ant-TAContig4556	2160	EFN71677	Ants	Camponotus floridanus	Radial spokehead-like protein 1
	Ant-TAContig6374	2159	EFN72790	Ants	Camponotus floridanus	StAR-related lipid transfer protein 7
	kmr23_comp55902_c0_seq1	2158	EGI65200	Ants	Acromyrmex echinatior	CDC45-related protein
	kmr27_comp80875_c1_seq1	2158	E2A8Y3	Ants	Camponotus floridanus	Nucleoprotein TPR
	Ant-TAContig5028	2156	EGI63405	Ants	Acromyrmex echinatior	Fatty acyl-CoA reductase 1
	kmr23_comp66917_c1_seq1	2156	EFN74388	Ants	Camponotus floridanus	Midasin
	kmr25_comp72091_c0_seq1	2155	E2BQC8	Ants	Harathos saltator	Annexin
	Ant-TAContig6806	2155	EFN66174	Ants	Camponotus floridanus	Probable G-protein coupled receptor Mth-like 5
	kmr23_comp38164_c0_seq1	2154	EGI66684	Ants	Acromyrmex echinatior	Putative ATP-dependent RNA helicase DDX20
	Ant-TAContig11851	2153	EFN71595	Ants	Camponotus floridanus	Vacuolar ATP synthase subunit S1
	Ant-TAContig4011	2150	EFN61197	Ants	Camponotus floridanus	Protein scabrous
	kmr23_comp74115_c0_seq1	2149	EFN63605	Ants	Camponotus floridanus	Mediator of RNA polymerase II transcription subunit 17
	kmr23_comp71442_c0_seq1	2149	EFN70089	Ants	Camponotus floridanus	SUMO-activating enzyme subunit 2
	kmr23_comp71966_c0_seq1	2147	EFN68976	Ants	Camponotus floridanus	Chitooligosaccharidolytic beta-N-acetylglucosaminidase
	Ant-TAContig5558	2147	EFN69248	Ants	Camponotus floridanus	Lin-9-like protein
	kmr23_comp74720_c0_seq1	2147	EFN64488	Ants	Camponotus floridanus	Nucleolar protein 10
	kmr25_comp39979_c0_seq1	2146	E2AEK4	Ants	Camponotus floridanus	Adenylate kinase
	Ant-TAContig5909	2145	EFN61825	Ants	Camponotus floridanus	hypothetical protein EAG_10732
	kmr25_comp83373_c0_seq2	2143	EFZ21589	Ants	Solenopsis invicta	hypothetical protein SINV_11254
	Ant-TAContig5052	2143	EFN62745	Ants	Camponotus floridanus	Ras association domain-containing protein 8
	kmr23_comp71900_c0_seq1	2143	EFN68386	Ants	Camponotus floridanus	Seryl-tRNA synthetase, cytoplasmic
	Ant-TAContig576	2142	EFN75292	Ants	Harpegnathos saltator	Probable histone-arginine methyltransferase CARMER
	kmr23_comp71428_c0_seq1	2141	EGI70962	Ants	Acromyrmex echinatior	Aspartyl-tRNA synthetase, cytoplasmic
	Ant-TAContig4582	2141	EFN66627	Ants	Camponotus floridanus	D-glucuronyl C5-epimerase
	kmr25_comp72243_c0_seq1	2138	EFN71566	Ants	Camponotus floridanus	hypothetical protein EAG_14245
	kmr25_comp39469_c0_seq1	2136	E2AR77	Ants	Camponotus floridanus	F-box only protein 42
	kmr23_comp75289_c0_seq1	2136	EFN65054	Ants	Camponotus floridanus	Vacuolar protein sorting-associated protein 33A
	Ant-TAContig2577	2134	EGI62083	Ants	Acromyrmex echinatior	TGF-beta receptor type-1
	Ant-TAContig3502	2133	EFN60565	Ants	Camponotus floridanus	hypothetical protein EAG_13040
	kmr23_comp78910_c0_seq1	2133	EFN62883	Ants	Camponotus floridanus	Putative inorganic phosphate cotransporter
	kmr23_comp70279_c0_seq1	2132	EFN73083	Ants	Camponotus floridanus	hypothetical protein EAG_04387
	Ant-TAContig166	2132	EFN65288	Ants	Camponotus floridanus	Probable G-protein coupled receptor Mth-like 1
	kmr23_comp62945_c1_seq1	2131	E2ARG0	Ants	Camponotus floridanus	Acetylcholine receptor subunit alpha-like 2
	kmr23_comp34909_c0_seq1	2130	EFN63223	Ants	Camponotus floridanus	Vam6/Vps39-like protein
	kmr27_comp88295_c0_seq2	2126	EFN87604	Ants	Harpegnathos saltator	Transmembrane 9 superfamily member 3
	kmr29_comp92221_c0_seq1	2123	E2AUD7	Ants	Camponotus floridanus	tRNA-splicing endonuclease subunit Sen34
	kmr25_comp84933_c13_seq4	2123	EFN70055	Ants	Camponotus floridanus	Ubiquitin-conjugating enzyme E2-24 kDa
	kmr23_comp71582_c0_seq1	2120	E1ZV41	Ants	Camponotus floridanus	Circadian clock-controlled protein
	kmr23_comp37902_c0_seq1	2120	EFN74916	Ants	Camponotus floridanus	Serine/threonine-protein kinase Chk2
	Ant-TAContig5101	2118	EFN69520	Ants	Camponotus floridanus	Alpha-aminoadipic semialdehyde synthase, mitochondrial
	Ant-TAContig3217	2118	EFN63855	Ants	Camponotus floridanus	Probable phospholipid-transporting ATPase VA
	Ant-TAContig196	2118	EFN68099	Ants	Camponotus floridanus	SNW domain-containing protein 1
	kmr27_comp83817_c0_seq2	2117	E1ZWB3	Ants	Camponotus floridanus	Low-density lipoprotein receptor-related protein 1B
	Ant-TAContig4620	2116	EFN64159	Ants	Camponotus floridanus	E3 ubiquitin-protein ligase SIAH1
	kmr23_comp36114_c0_seq1	2115	EFN68289	Ants	Camponotus floridanus	hypothetical protein EAG_13200
	kmr23_comp55493_c0_seq1	2113	EFN74404	Ants	Camponotus floridanus	MPN domain-containing protein CG4751
	kmr23_comp76082_c0_seq1	2112	EFN73843	Ants	Camponotus floridanus	Esterase FE4
	kmr23_comp68986_c2_seq1	2112	EFN72542	Ants	Camponotus floridanus	Solute carrier organic anion transporter family member 3A1
	kmr23_comp33927_c1_seq1	2111	EFN65613	Ants	Camponotus floridanus	Putative cysteine proteinase CG12163
	kmr23_comp56116_c1_seq1	2111	E2A3Z3	Ants	Camponotus floridanus	Selenide, water dikinase
	Ant-TAContig4044	2109	EFN64699	Ants	Camponotus floridanus	Rabenosyn-5
	kmr23_comp70335_c0_seq1	2108	E2A4J2	Ants	Camponotus floridanus	Enolase
	kmr23_comp70811_c0_seq1	2108	EFN65707	Ants	Camponotus floridanus	hypothetical protein EAG_10964
	kmr27_comp83601_c0_seq1	2108	E2C091	Ants	Harathos saltator	Zeta-sarcoglycan (Fragment)
	kmr23_comp34027_c0_seq1	2107	EFN68536	Ants	Camponotus floridanus	Glycylpeptide N-tetradecanoyltransferase 2
	kmr23_comp69834_c7_seq1	2107	EFN65249	Ants	Camponotus floridanus	Nesprin-2
	kmr23_comp33726_c0_seq1	2106	E2APE4	Ants	Camponotus floridanus	Ras-related GTP-binding protein D
	Ant-TAContig3134	2105	EFN71953	Ants	Camponotus floridanus	Repressor of RNA polymerase III transcription MAF1-like protein
	kmr23_comp69456_c1_seq1	2105	E2AIV7	Ants	Camponotus floridanus	Sodium-independent sulfate anion transporter
	kmr27_comp89159_c1_seq1	2104	EFN62652	Ants	Camponotus floridanus	Acyl-coenzyme A:6-aminopenicillanic-acid-acyltransferase 40 kDa form
	kmr29_comp94958_c1_seq4	2103	E2ARE1	Ants	Camponotus floridanus	Putative uncharacterized protein
	kmr23_comp79035_c0_seq1	2102	EGI63653	Ants	Acromyrmex echinatior	Glucose dehydrogenase
	kmr23_comp73393_c0_seq1	2102	EFN73623	Ants	Camponotus floridanus	Torso-like protein
	kmr23_comp71949_c0_seq1	2101	EFN60783	Ants	Camponotus floridanus	AP-2 complex subunit mu-1
	kmr27_comp86597_c1_seq1	2101	EGI65818	Ants	Acromyrmex echinatior	Ubiquitin-associated and SH3 domain-containing protein B
	Ant-TAContig5261	2098	EFN66872	Ants	Camponotus floridanus	Asparaginyl-tRNA synthetase, cytoplasmic
	kmr29_comp90684_c0_seq4	2097	EFN73379	Ants	Camponotus floridanus	hypothetical protein EAG_07096
	Ant-TAContig608	2097	EGI63407	Ants	Acromyrmex echinatior	Synaptotagmin-7
	kmr25_comp72218_c0_seq1	2095	EFN70463	Ants	Camponotus floridanus	Anaphase-promoting complex subunit 7
	kmr31_comp7960_c0_seq1	2092	EFN69820	Ants	Camponotus floridanus	JmjC domain-containing protein 4
	Ant-TAContig4643	2092	EFN68897	Ants	Camponotus floridanus	Notchless protein-like protein 1
	kmr29_comp85917_c0_seq1	2091	EFN64562	Ants	Camponotus floridanus	Maltase 1
	Ant-TAContig5090	2090	EGI59971	Ants	Acromyrmex echinatior	DNA replication licensing factor MCM9
	kmr25_comp62548_c0_seq2	2088	E2A0X9	Ants	Camponotus floridanus	Membrane-bound O-acyltransferase domain-containing protein 2
	kmr31_comp4568_c0_seq1	2087	E2ARV4	Ants	Camponotus floridanus	RNA polymerase II-associated factor 1-like protein
	Ant-TAContig2570	2087	EGI59821	Ants	Acromyrmex echinatior	Uncharacterized protein C19orf47-like protein
	kmr23_comp34102_c0_seq1	2086	EFN67167	Ants	Camponotus floridanus	Coatomer subunit gamma-2
	kmr29_comp91462_c1_seq1	2084	F4WPW0	Ants	Acromyrmex echinatior	ER lumen protein retaining receptor
	kmr23_comp70848_c0_seq1	2080	EFN63973	Ants	Camponotus floridanus	Beta-hexosaminidase subunit beta
	kmr23_comp67604_c3_seq1	2078	EFN71979	Ants	Camponotus floridanus	Neuroligin-1
	Ant-TAContig4143	2077	EFN64133	Ants	Camponotus floridanus	Protein daughter of sevenless
	kmr29_comp93985_c0_seq1	2076	E2AEB5	Ants	Camponotus floridanus	Chondroadherin
	Ant-TAContig11875	2075	EFN72235	Ants	Camponotus floridanus	DNA-directed RNA polymerase III subunit RPC5
	kmr23_comp74415_c0_seq1	2074	EFN62485	Ants	Camponotus floridanus	Beta-lactamase-like protein LOC255374-like protein
	kmr25_comp79654_c0_seq1	2074	EFN70175	Ants	Camponotus floridanus	Nischarin
	Ant-TAContig3426	2073	EFN66140	Ants	Camponotus floridanus	Fatty acyl-CoA reductase 1
	Ant-TAContig5946	2071	EFN64354	Ants	Camponotus floridanus	hypothetical protein EAG_15938
	Ant-TAContig6807	2067	EFN64747	Ants	Camponotus floridanus	hypothetical protein EAG_05161
	kmr29_comp93445_c0_seq2	2066	E1ZVL9	Ants	Camponotus floridanus	Nuclear receptor coactivator 7
	kmr29_comp88803_c0_seq9	2066	EGI63289	Ants	Acromyrmex echinatior	Uncharacterized protein C12orf26
	kmr31_comp1920_c0_seq2	2064	EFN65902	Ants	Camponotus floridanus	Deoxyribonuclease tatD
	Ant-TAContig2512	2059	EFN65527	Ants	Camponotus floridanus	Retinoblastoma-binding protein 8
	kmr23_comp35766_c0_seq1	2057	EFN68171	Ants	Camponotus floridanus	DnaJ-like protein subfamily C member 11
	kmr25_comp82440_c0_seq1	2057	EFN73763	Ants	Camponotus floridanus	hypothetical protein EAG_02547
	Ant-TAContig2506	2055	EFN62074	Ants	Camponotus floridanus	RING finger protein unkempt
	Ant-TAContig5488	2054	EFN61057	Ants	Camponotus floridanus	Probable cytochrome P450 303a1
	kmr23_comp76003_c0_seq1	2049	EFN62928	Ants	Camponotus floridanus	Neuroblastoma-amplified gene protein
	Ant-TAContig4771	2048	EFN70793	Ants	Camponotus floridanus	Mediator of RNA polymerase II transcription subunit 1
	kmr25_comp75437_c1_seq1	2047	E2A6U5	Ants	Camponotus floridanus	Deformed epidermal autoregulatory factor 1
	kmr31_comp12038_c0_seq1	2046	EFN61970	Ants	Camponotus floridanus	Cell division cycle protein 20-like protein
	kmr25_comp81830_c0_seq1	2046	EFN73091	Ants	Camponotus floridanus	Intraflagellar transport protein 57-like protein
	kmr23_comp71009_c0_seq1	2045	EFN63982	Ants	Camponotus floridanus	3-ketoacyl-CoA thiolase, mitochondrial
	kmr23_comp62805_c1_seq1	2045	E2AJI2	Ants	Camponotus floridanus	Leucine-rich repeat neuronal protein 1
	kmr25_comp84713_c0_seq6	2044	EFN63564	Ants	Camponotus floridanus	Probable ATP-dependent RNA helicase DDX56
	kmr27_comp88867_c0_seq2	2043	EFN74135	Ants	Camponotus floridanus	Nuclear hormone receptor FTZ-F1 beta
	kmr25_comp84116_c2_seq1	2042	E2A6S0	Ants	Camponotus floridanus	Protein kinase C-binding protein 1
	kmr23_comp72281_c0_seq1	2041	EFN66468	Ants	Camponotus floridanus	ATPase family AAA domain-containing protein 1-B
	kmr25_comp79700_c1_seq1	2041	EFN68917	Ants	Camponotus floridanus	Pre-mRNA-processing factor 40-like protein A
	Ant-TAContig4128	2039	EFN60983	Ants	Camponotus floridanus	Brain protein 44
	kmr23_comp73051_c0_seq1	2039	E2A1J7	Ants	Camponotus floridanus	Porphobilinogen deaminase
	kmr29_comp96750_c0_seq1	2039	E9J691	Ants	Solenopsis invicta	Putative uncharacterized protein (Fragment)
	kmr25_comp39102_c0_seq1	2037	EFZ15474	Ants	Solenopsis invicta	hypothetical protein SINV_06748
	kmr23_comp34200_c1_seq1	2036	EFN74399	Ants	Camponotus floridanus	Non-specific lipid-transfer protein
	kmr25_comp79432_c0_seq1	2034	EFN72227	Ants	Camponotus floridanus	Brefeldin A-inhibited guanine nucleotide-exchange protein 2
	kmr27_comp88316_c7_seq11	2033	EFZ18698	Ants	Solenopsis invicta	hypothetical protein SINV_02941
	kmr23_comp67635_c2_seq1	2032	EFN87576	Ants	Harpegnathos saltator	Cyclic AMP-dependent transcription factor ATF-2
	Ant-TAContig11709	2032	EFZ15244	Ants	Solenopsis invicta	hypothetical protein SINV_08424
	kmr29_comp92236_c0_seq3	2028	EFN72699	Ants	Camponotus floridanus	hypothetical protein EAG_06884
	kmr25_comp77905_c1_seq3	2028	EFN67633	Ants	Camponotus floridanus	Tumor protein D54
	Ant-TAContig168	2027	EFN69483	Ants	Camponotus floridanus	LIM and senescent cell antigen-like-containing domain protein 2
	kmr23_comp73857_c0_seq1	2026	EFN68959	Ants	Camponotus floridanus	Mitochondrial import inner membrane translocase subunit TIM44
	kmr23_comp53409_c0_seq1	2023	EFN65879	Ants	Camponotus floridanus	Myotubularin-related protein 10-B
	Ant-TAContig3320	2022	EFN70160	Ants	Camponotus floridanus	GPI mannosyltransferase 2
	kmr23_comp50416_c1_seq1	2020	EFN70885	Ants	Camponotus floridanus	FYVE finger-containing phosphoinositide kinase
	kmr25_comp49722_c0_seq1	2020	E2BKQ1	Ants	Harathos saltator	NudC domain-containing protein 1
	kmr23_comp72243_c0_seq1	2018	EFN71840	Ants	Camponotus floridanus	Nucleolar MIF4G domain-containing protein 1
	kmr25_comp83241_c0_seq1	2017	EFN68708	Ants	Camponotus floridanus	Gustatory receptor trehalose 1
	Ant-TAContig843	2014	EFN72202	Ants	Camponotus floridanus	hypothetical protein EAG_12847
	Ant-TAContig7830	2013	EFN64090	Ants	Camponotus floridanus	tRNA modification GTPase GTPBP3, mitochondrial
	kmr25_comp62472_c0_seq1	2011	EGI57180	Ants	Acromyrmex echinatior	GPI mannosyltransferase 1
	kmr23_comp34630_c1_seq1	2010	EFN71111	Ants	Camponotus floridanus	Protein timeless-like protein
	Ant-TAContig2085	2007	EFN64797	Ants	Camponotus floridanus	Cyclin-dependent kinase-like 2
	Ant-TAContig3237	2007	EGI62848	Ants	Acromyrmex echinatior	hypothetical protein G5I_08843
	kmr23_comp74763_c0_seq1	2004	EFN72697	Ants	Camponotus floridanus	hypothetical protein EAG_06882
	kmr23_comp72922_c0_seq1	2004	EFN68974	Ants	Camponotus floridanus	Ubiquitin-conjugating enzyme E2-17 kDa
	Ant-TAContig2423	2003	EFN65764	Ants	Camponotus floridanus	Protein sarah
	kmr23_comp70878_c0_seq1	2002	EFN61541	Ants	Camponotus floridanus	Glucose-6-phosphate isomerase
	kmr27_comp90097_c3_seq2	2002	EFN69697	Ants	Camponotus floridanus	Hormone receptor 4
	kmr25_comp79494_c0_seq3	2002	EFN64825	Ants	Camponotus floridanus	NMDA receptor-regulated protein 1
	kmr29_comp82112_c0_seq5	2000	EGI61339	Ants	Acromyrmex echinatior	Exosome complex exonuclease RRP42
	Ant-TAContig3825	1999	EFN62327	Ants	Camponotus floridanus	Sodium channel protein 60E
	Ant-TAContig1301	1998	EFZ13929	Ants	Solenopsis invicta	hypothetical protein SINV_03017
	kmr23_comp70612_c0_seq1	1997	E2B178	Ants	Camponotus floridanus	Alpha-tocopherol transfer protein-like
	kmr23_comp72530_c0_seq1	1995	EFZ20277	Ants	Solenopsis invicta	hypothetical protein SINV_80005
	kmr23_comp34573_c0_seq1	1992	EFN81219	Ants	Harpegnathos saltator	Probable cytochrome P450 49a1
	kmr23_comp53157_c1_seq1	1992	E2B1W5	Ants	Camponotus floridanus	Protein ovo (Fragment)
	kmr23_comp50193_c0_seq1	1991	EFN74022	Ants	Camponotus floridanus	hypothetical protein EAG_14606
	kmr31_comp1042_c0_seq1	1991	EFN85445	Ants	Harpegnathos saltator	Probable phosphoserine aminotransferase
	kmr23_comp34066_c0_seq1	1991	EFN74184	Ants	Camponotus floridanus	SHC-transforming protein 1
	Ant-TAContig6361	1990	EFN67709	Ants	Camponotus floridanus	Aldehyde dehydrogenase, mitochondrial
	Ant-TAContig205	1990	EFN62565	Ants	Camponotus floridanus	Zinc finger protein JACKDAW
	kmr25_comp84067_c0_seq1	1988	E2A4S7	Ants	Camponotus floridanus	Putative uncharacterized protein
	kmr23_comp74005_c0_seq1	1987	E2A8V0	Ants	Camponotus floridanus	Dihydrolipoyllysine-residue acetyltransferase component of pyruvate dehydrogenase complex, mitochondrial
	Ant-TAContig611	1987	EFN67897	Ants	Camponotus floridanus	Kinesin-like protein KIF19
	Ant-TAContig9142	1984	EFN61020	Ants	Camponotus floridanus	Neuroendocrine convertase 2
	kmr25_comp79687_c0_seq1	1984	E2AKY1	Ants	Camponotus floridanus	WD repeat and FYVE domain-containing protein 2
	kmr23_comp55623_c2_seq1	1983	EFN60997	Ants	Camponotus floridanus	EGF-like domain-containing protein 7
	Ant-TAContig892	1982	EFN74190	Ants	Camponotus floridanus	Ankyrin repeat and MYND domain-containing protein 2
	kmr23_comp77783_c0_seq1	1981	EFN72262	Ants	Camponotus floridanus	hypothetical protein EAG_07283
	kmr23_comp72149_c0_seq1	1981	E2A6U6	Ants	Camponotus floridanus	U3 small nucleolar RNA-associated protein 18-like protein
	kmr23_comp67774_c1_seq1	1979	EFN60523	Ants	Camponotus floridanus	hypothetical protein EAG_12482
	kmr25_comp69963_c0_seq1	1979	E2AYS7	Ants	Camponotus floridanus	Splicing factor 1
	kmr23_comp77776_c0_seq1	1977	EFN71448	Ants	Camponotus floridanus	HEAT repeat-containing protein 5B
	kmr23_comp34405_c0_seq1	1977	EGI59453	Ants	Acromyrmex echinatior	Putative RNA exonuclease NEF-sp
	kmr25_comp79241_c0_seq1	1976	E9IPG5	Ants	Solenopsis invicta	Putative uncharacterized protein (Fragment)
	kmr25_comp69568_c0_seq1	1974	E1ZUV7	Ants	Camponotus floridanus	BR serine/threonine-protein kinase 2
	kmr29_comp94833_c1_seq2	1974	EFN63865	Ants	Camponotus floridanus	Probable 39S ribosomal protein L24, mitochondrial
	kmr25_comp74240_c0_seq1	1973	E2ABZ1	Ants	Camponotus floridanus	Putative uncharacterized protein
	kmr23_comp57359_c2_seq1	1972	EFN61916	Ants	Camponotus floridanus	Chorion peroxidase
	Ant-TAContig6020	1972	EFZ18824	Ants	Solenopsis invicta	hypothetical protein SINV_14954
	Ant-TAContig3990	1970	EGI58162	Ants	Acromyrmex echinatior	Pre-mRNA-splicing factor ISY1-like protein
	Ant-TAContig4394	1969	EFN66499	Ants	Camponotus floridanus	Niemann-Pick C1 protein
	Ant-TAContig5074	1969	EFN69712	Ants	Camponotus floridanus	Proto-oncogene tyrosine-protein kinase receptor ret
	Ant-TAContig365	1967	EFN62177	Ants	Camponotus floridanus	hypothetical protein EAG_12290
	kmr23_comp51407_c0_seq1	1966	EFN68848	Ants	Camponotus floridanus	Lachesin
	kmr27_comp89320_c1_seq23	1965	E2AJD3	Ants	Camponotus floridanus	Beta-1,4-N-acetylgalactaminyltransferase bre-4
	Ant-TAContig635	1964	EFN63665	Ants	Camponotus floridanus	E3 ubiquitin-protein ligase Topors
	kmr23_comp34771_c0_seq1	1963	EFN68905	Ants	Camponotus floridanus	Kinetochore protein NDC80-like protein
	Ant-TAContig5750	1962	EFN62937	Ants	Camponotus floridanus	UDP-glucuronosyltransferase 2C1
	kmr25_comp39744_c0_seq1	1960	EFN60923	Ants	Camponotus floridanus	Glutathione synthetase
	kmr23_comp74750_c0_seq1	1960	EFN62767	Ants	Camponotus floridanus	Protein KIAA1219
	kmr23_comp34672_c1_seq1	1960	EFN61014	Ants	Camponotus floridanus	Putative ATP-dependent RNA helicase TDRD9
	kmr23_comp56173_c1_seq1	1960	EFN63172	Ants	Camponotus floridanus	Zinc finger protein 26
	kmr25_comp81312_c0_seq2	1959	EFN72139	Ants	Camponotus floridanus	Coagulation factor X
	kmr29_comp96744_c0_seq1	1959	E9J1R8	Ants	Solenopsis invicta	Proteasome subunit alpha type (Fragment)
	Insect-TAContig936	1959	EFN62706	Ants	Camponotus floridanus	Transcription cofactor vestigial-like protein 4
	Ant-TAContig8920	1958	EFN68380	Ants	Camponotus floridanus	ALK tyrosine kinase receptor
	kmr23_comp72109_c0_seq1	1958	EFN64396	Ants	Camponotus floridanus	Bleomycin hydrolase
	Ant-TAContig3617	1958	EFN71390	Ants	Camponotus floridanus	GTP-binding protein Di-Ras2
	Ant-TAContig4239	1958	EFN72825	Ants	Camponotus floridanus	NADPH:adrenodoxin oxidoreductase, mitochondrial
	kmr23_comp72998_c0_seq1	1958	EFN69307	Ants	Camponotus floridanus	Sphingosine-1-phosphate lyase
	kmr23_comp73578_c0_seq1	1956	E1ZVE7	Ants	Camponotus floridanus	Protein FAM98A
	Ant-TAContig5571	1955	EFN73927	Ants	Camponotus floridanus	Probable pyruvate dehydrogenase E1 component subunit alpha, mitochondrial
	Ant-TAContig5445	1953	EFN67554	Ants	Camponotus floridanus	Tubulin--tyrosine ligase-like protein 12
	kmr23_comp75673_c0_seq1	1951	EFN63031	Ants	Camponotus floridanus	Mannose-1-phosphate guanyltransferase alpha
	Ant-TAContig2170	1950	EFN64765	Ants	Camponotus floridanus	4-hydroxybutyrate coenzyme A transferase
	kmr29_comp96829_c3_seq27	1950	EFN61849	Ants	Camponotus floridanus	Cytosolic carboxypeptidase 1
	kmr31_comp2655_c0_seq1	1949	EFN64635	Ants	Camponotus floridanus	hypothetical protein EAG_08278
	kmr23_comp36738_c0_seq1	1949	EFN71681	Ants	Camponotus floridanus	Potassium channel subfamily K member 9
	kmr23_comp78618_c0_seq1	1948	E1ZZ75	Ants	Camponotus floridanus	Putative uncharacterized protein
	kmr23_comp33032_c0_seq1	1946	EGI65199	Ants	Acromyrmex echinatior	Nucleoredoxin
	kmr25_comp39674_c0_seq1	1943	EGI64438	Ants	Acromyrmex echinatior	hypothetical protein G5I_07105
	Ant-TAContig3394	1940	EFN68439	Ants	Camponotus floridanus	T-complex protein 1 subunit zeta
	Ant-TAContig7101	1938	EFN67973	Ants	Camponotus floridanus	Double-stranded RNA-specific editase Adar
	kmr27_comp81877_c0_seq1	1938	E2AHT1	Ants	Camponotus floridanus	Protein FAM20B
	Ant-TAContig4767	1937	EFN61523	Ants	Camponotus floridanus	hypothetical protein EAG_11759
	kmr23_comp76041_c0_seq1	1937	EFN74456	Ants	Camponotus floridanus	Lethal(3)malignant brain tumor-like 3 protein
	Ant-TAContig1366	1937	EFN66453	Ants	Camponotus floridanus	Low density lipoprotein receptor adapter protein 1
	kmr25_comp79334_c0_seq1	1936	E2AD78	Ants	Camponotus floridanus	cGMP-dependent protein kinase, isozyme 1
	Ant-TAContig6738	1933	EFN71559	Ants	Camponotus floridanus	hypothetical protein EAG_14238
	Ant-TAContig920	1933	EFN74636	Ants	Camponotus floridanus	Uncharacterized protein C17orf39-like protein
	kmr27_comp75797_c1_seq4	1932	E2ADQ4	Ants	Camponotus floridanus	Neurofibromin
	kmr23_comp72118_c0_seq1	1931	EFN70106	Ants	Camponotus floridanus	Carboxypeptidase N subunit 2
	kmr23_comp64341_c2_seq1	1931	EFN62928	Ants	Camponotus floridanus	Neuroblastoma-amplified gene protein
	Ant-TAContig5200	1931	EFN64776	Ants	Camponotus floridanus	Ubiquitin-associated domain-containing protein 1
	kmr23_comp73949_c0_seq1	1930	E2AUP9	Ants	Camponotus floridanus	Zinc finger protein 425
	Ant-TAContig197	1929	EFN68276	Ants	Camponotus floridanus	Putative inorganic phosphate cotransporter
	kmr23_comp33915_c0_seq1	1928	E2A277	Ants	Camponotus floridanus	KH domain-containing, RNA-binding, signal transduction-associated protein 3
	Ant-TAContig5231	1928	EFN68091	Ants	Camponotus floridanus	Mortality factor 4-like protein 1
	Ant-TAContig5026	1927	EFN63344	Ants	Camponotus floridanus	Glycerophosphodiester phosphodiesterase 1
	kmr27_comp89537_c0_seq4	1926	EFN71505	Ants	Camponotus floridanus	FK506-binding protein 6
	Ant-TAContig6914	1925	EFN66991	Ants	Camponotus floridanus	RING finger protein 157
	kmr25_comp73865_c0_seq1	1923	E9I8W9	Ants	Solenopsis invicta	Putative uncharacterized protein (Fragment)
	Ant-TAContig3419	1923	EFN69871	Ants	Camponotus floridanus	Solute carrier family 25 member 44
	kmr23_comp70041_c68_seq1	1922	E1ZXZ9	Ants	Camponotus floridanus	Ancient ubiquitous protein 1
	kmr23_comp75186_c0_seq1	1922	EFN68907	Ants	Camponotus floridanus	cAMP-dependent protein kinase type II regulatory subunit
	kmr23_comp70552_c0_seq1	1922	EFZ23184	Ants	Solenopsis invicta	hypothetical protein SINV_10420
	kmr23_comp70726_c0_seq1	1920	EFZ14688	Ants	Solenopsis invicta	hypothetical protein SINV_15552
	Ant-TAContig3862	1920	EFN66929	Ants	Camponotus floridanus	Serine/threonine-protein kinase mos
	Ant-TAContig5198	1918	EFN73274	Ants	Camponotus floridanus	Putative EGF-like domain-containing protein FLJ14712
	Ant-TAContig1381	1917	EFN71295	Ants	Camponotus floridanus	Glucose dehydrogenase [acceptor]
	Ant-TAContig8142	1916	EFN70560	Ants	Camponotus floridanus	DNA replication licensing factor MCM5
	kmr23_comp35559_c0_seq1	1915	E2A529	Ants	Camponotus floridanus	Uncharacterized MFS-type transporter C19orf28
	Ant-TAContig4517	1914	EFN62663	Ants	Camponotus floridanus	hypothetical protein EAG_16407
	kmr23_comp58822_c3_seq1	1912	E2ARP4	Ants	Camponotus floridanus	Dynein beta chain, ciliary
	kmr25_comp82218_c1_seq3	1912	EFN69104	Ants	Camponotus floridanus	hypothetical protein EAG_15546
	Ant-TAContig6865	1911	EFN71125	Ants	Camponotus floridanus	Protein LTV1-like protein
	Ant-TAContig6881	1910	EFN67301	Ants	Camponotus floridanus	hypothetical protein EAG_15083
	kmr23_comp75488_c0_seq1	1910	EFN61621	Ants	Camponotus floridanus	NEDD8-activating enzyme E1 regulatory subunit
	kmr25_comp85474_c0_seq2	1909	EFN69193	Ants	Camponotus floridanus	Nose resistant to fluoxetine protein 6
	kmr23_comp73851_c0_seq1	1909	EFN69532	Ants	Camponotus floridanus	Phosphoribosyl pyrophosphate synthetase-associated protein 2
	kmr23_comp75952_c0_seq1	1907	F4WTE7	Ants	Acromyrmex echinatior	Origin recognition complex subunit 2
	kmr23_comp75834_c0_seq1	1905	EFZ15232	Ants	Solenopsis invicta	hypothetical protein SINV_06896
	kmr23_comp69626_c2_seq1	1905	F4WFA0	Ants	Acromyrmex echinatior	Protein ECT2
	kmr23_comp65856_c0_seq1	1904	EFN65395	Ants	Camponotus floridanus	Low-density lipoprotein receptor
	Ant-TAContig2371	1902	EFN67862	Ants	Camponotus floridanus	Guanine nucleotide-releasing factor 2
	kmr29_comp89384_c0_seq1	1902	EFN70007	Ants	Camponotus floridanus	Hemolymph lipopolysaccharide-binding protein
	kmr25_comp85324_c1_seq5	1901	E9IK52	Ants	Solenopsis invicta	Putative uncharacterized protein (Fragment)
	Ant-TAContig2601	1899	EFN61438	Ants	Camponotus floridanus	FAD-dependent oxidoreductase domain-containing protein 1
	kmr27_comp57628_c0_seq1	1899	E2ASE0	Ants	Camponotus floridanus	Gamma-secretase subunit Aph-1
	Ant-TAContig3469	1898	EFN69826	Ants	Camponotus floridanus	Rho guanine nucleotide exchange factor 3
	kmr23_comp34734_c1_seq1	1897	EFN67994	Ants	Camponotus floridanus	Ubiquitin-conjugating enzyme E2 J2
	kmr23_comp72114_c0_seq1	1895	EGI62852	Ants	Acromyrmex echinatior	Neuroblastoma suppressor of tumorigenicity 1
	Ant-TAContig518	1893	EFN69562	Ants	Camponotus floridanus	rRNA 2'-O-methyltransferase fibrillarin
	kmr25_comp78506_c0_seq1	1893	E2ABV7	Ants	Camponotus floridanus	Transmembrane protein 64
	kmr31_comp1060_c1_seq1	1892	E2AY67	Ants	Camponotus floridanus	Protein charybde
	kmr25_comp83194_c2_seq1	1891	EFN69988	Ants	Camponotus floridanus	ATP-binding cassette sub-family A member 5
	kmr25_comp77536_c0_seq1	1889	E2ABN7	Ants	Camponotus floridanus	Putative uncharacterized protein
	kmr23_comp76634_c0_seq1	1888	EGI64810	Ants	Acromyrmex echinatior	Chromatin assembly factor 1 subunit B
	kmr23_comp54953_c0_seq1	1888	E2AG77	Ants	Camponotus floridanus	Phphatidate cytidylyltransferase
	Ant-TAContig4795	1888	EFN63567	Ants	Camponotus floridanus	U2 small nuclear ribonucleoprotein auxiliary factor 35 kDa subunit-related protein 1
	kmr23_comp74495_c0_seq1	1887	EFN72162	Ants	Camponotus floridanus	Ero1-like protein
	kmr23_comp72141_c0_seq1	1887	E2AWL2	Ants	Camponotus floridanus	Probable methylmalonate-semialdehyde dehydrogenase [acylating], mitochondrial
	Ant-TAContig5218	1886	EFZ22695	Ants	Solenopsis invicta	hypothetical protein SINV_09396
	Ant-TAContig5069	1884	EFN64967	Ants	Camponotus floridanus	Poly(A)-specific ribonuclease PARN-like domain-containing protein 1
	kmr23_comp71001_c0_seq1	1882	EFN74160	Ants	Camponotus floridanus	DnaJ-like protein subfamily B member 11
	kmr25_comp84061_c0_seq1	1880	E1ZX84	Ants	Camponotus floridanus	Activating signal cointegrator 1 complex subunit 1
	kmr23_comp65623_c0_seq1	1879	E2AN21	Ants	Camponotus floridanus	Mono-ADP-ribyltransferase sirtuin-6
	kmr23_comp71379_c0_seq1	1879	EFN61728	Ants	Camponotus floridanus	Putative ATP-dependent RNA helicase me31b
	kmr27_comp88327_c0_seq1	1879	E1ZZJ3	Ants	Camponotus floridanus	Putative uncharacterized protein
	kmr23_comp70432_c0_seq1	1879	EFN72192	Ants	Camponotus floridanus	Tubulin alpha chain
	kmr29_comp92630_c0_seq1	1878	EGI70289	Ants	Acromyrmex echinatior	Integrin alpha-PS4
	kmr23_comp73909_c0_seq1	1878	EFN60525	Ants	Camponotus floridanus	Pre-mRNA 3'-end-processing factor FIP1
	kmr23_comp71787_c0_seq1	1877	E2AJA9	Ants	Camponotus floridanus	Eukaryotic translation initiation factor 4E type 3 (Fragment)
	kmr23_comp74937_c0_seq1	1877	EFN69663	Ants	Camponotus floridanus	UPF0027 protein C22orf28
	kmr27_comp88547_c0_seq2	1875	E2AQP9	Ants	Camponotus floridanus	Protein misato
	kmr23_comp76459_c0_seq1	1873	EFN74237	Ants	Camponotus floridanus	Slit-like protein 2 protein
	Ant-TAContig153	1872	EFN68014	Ants	Camponotus floridanus	UDP-glucuronic acid decarboxylase 1
	kmr27_comp85460_c0_seq1	1871	E2AYH8	Ants	Camponotus floridanus	Putative uncharacterized protein
	kmr23_comp68762_c2_seq1	1870	EFN79822	Ants	Harpegnathos saltator	ATP-binding cassette sub-family A member 3
	kmr23_comp71284_c0_seq1	1869	EFN70777	Ants	Camponotus floridanus	Dimethyladenosine transferase 1, mitochondrial
	kmr23_comp72811_c0_seq1	1867	EFN69776	Ants	Camponotus floridanus	Guanine nucleotide-binding protein G(i) subunit alpha
	kmr23_comp36446_c1_seq1	1864	EFN65530	Ants	Camponotus floridanus	ATP-binding domain-containing protein 3
	Ant-TAContig1387	1863	EFN61811	Ants	Camponotus floridanus	Protein yellow
	kmr23_comp69366_c7_seq1	1862	EFN61120	Ants	Camponotus floridanus	HEAT repeat-containing protein C7orf27
	kmr23_comp34415_c1_seq1	1862	E2ACX7	Ants	Camponotus floridanus	Putative tyrine-protein kinase Wsck
	kmr27_comp85866_c1_seq1	1861	EFN68369	Ants	Camponotus floridanus	hypothetical protein EAG_10342
	kmr31_comp7547_c0_seq1	1861	E2AKC9	Ants	Camponotus floridanus	RING finger protein 37
	Ant-TAContig5127	1860	EFN66646	Ants	Camponotus floridanus	Importin subunit alpha-7
	kmr23_comp75973_c0_seq1	1859	EFN62241	Ants	Camponotus floridanus	Probable serine/threonine-protein kinase pelle
	kmr31_comp7997_c0_seq1	1858	EGI70377	Ants	Acromyrmex echinatior	CDK5 regulatory subunit-associated protein 3
	kmr27_comp89860_c1_seq2	1858	EFN67674	Ants	Camponotus floridanus	Stress-activated map kinase-interacting protein 1
	kmr23_comp70932_c0_seq1	1856	EFN72025	Ants	Camponotus floridanus	Juvenile hormone epoxide hydrolase 1
	kmr25_comp77175_c0_seq1	1855	E2A3T5	Ants	Camponotus floridanus	Mitochondrial import receptor subunit TOM40-like protein
	kmr25_comp52938_c0_seq1	1855	E1ZXV1	Ants	Camponotus floridanus	WD repeat-containing protein 79
	Ant-TAContig6400	1854	EFN65078	Ants	Camponotus floridanus	CpG-binding protein
	kmr23_comp73680_c0_seq1	1854	EFN68942	Ants	Camponotus floridanus	DnaJ-like protein subfamily B member 12
	kmr23_comp73597_c0_seq1	1852	EFN67393	Ants	Camponotus floridanus	Elongator complex protein 3
	kmr25_comp79569_c0_seq3	1850	E2ANA0	Ants	Camponotus floridanus	E3 ubiquitin-protein ligase LRSAM1
	kmr25_comp78292_c0_seq8	1848	EFZ14502	Ants	Solenopsis invicta	hypothetical protein SINV_12009
	kmr23_comp50812_c0_seq1	1847	EFZ18571	Ants	Solenopsis invicta	hypothetical protein SINV_13366
	Ant-TAContig544	1847	EFN63323	Ants	Camponotus floridanus	Transcription factor BTF3-like protein 4
	kmr27_comp56819_c0_seq1	1846	EFN68961	Ants	Camponotus floridanus	Dolichyl-diphosphooligosaccharide--protein glycosyltransferase 48 kDa subunit
	Ant-TAContig1315	1845	EFN65771	Ants	Camponotus floridanus	hypothetical protein EAG_01262
	Ant-TAContig5179	1845	EFN67736	Ants	Camponotus floridanus	TBC1 domain family member 16
	Ant-TAContig6786	1844	EFN74642	Ants	Camponotus floridanus	CDKAL1-like protein
	kmr23_comp33076_c0_seq1	1843	EFN66760	Ants	Camponotus floridanus	hypothetical protein EAG_08031
	kmr25_comp88760_c0_seq1	1843	E2A771	Ants	Camponotus floridanus	Inine-5'-monophphate dehydrogenase
	kmr23_comp51356_c0_seq1	1843	EFN86381	Ants	Harpegnathos saltator	Tubulin polyglutamylase TTLL6
	kmr25_comp78135_c0_seq1	1842	E1ZX19	Ants	Camponotus floridanus	Glutathione synthetase
	kmr23_comp71963_c0_seq1	1842	EFN71253	Ants	Camponotus floridanus	Zinc transporter SLC39A7
	kmr27_comp86956_c0_seq1	1841	EFZ16067	Ants	Solenopsis invicta	hypothetical protein SINV_02051
	kmr23_comp68370_c5_seq1	1841	EFN62404	Ants	Camponotus floridanus	Vacuolar protein sorting-associated protein 13A
	Ant-TAContig5868	1840	EFN63870	Ants	Camponotus floridanus	CWF19-like protein 1
	kmr25_comp72463_c0_seq1	1840	E2A046	Ants	Camponotus floridanus	Putative uncharacterized protein (Fragment)
	Ant-TAContig2567	1839	EFN73257	Ants	Camponotus floridanus	RNA methyltransferase-like protein 1
	kmr25_comp71769_c0_seq3	1836	EFN73734	Ants	Camponotus floridanus	26S proteasome non-ATPase regulatory subunit 11
	kmr23_comp72182_c0_seq1	1834	EGI64958	Ants	Acromyrmex echinatior	Elongation of very long chain fatty acids protein
	kmr25_comp83836_c0_seq1	1834	EFN74022	Ants	Camponotus floridanus	hypothetical protein EAG_14606
	kmr23_comp34063_c0_seq1	1833	EFN61304	Ants	Camponotus floridanus	Abhydrolase domain-containing protein 3
	kmr23_comp67543_c3_seq1	1833	EFN72584	Ants	Camponotus floridanus	D-aspartate oxidase
	kmr25_comp53376_c0_seq1	1833	EFN65214	Ants	Camponotus floridanus	WD repeat-containing protein 63
	kmr23_comp60263_c0_seq1	1832	EFZ12343	Ants	Solenopsis invicta	hypothetical protein SINV_09930
	kmr23_comp58278_c2_seq1	1831	EFN68466	Ants	Camponotus floridanus	Synaptotagmin-12
	kmr23_comp71638_c0_seq1	1830	EFN69021	Ants	Camponotus floridanus	Cell division protein kinase 8
	kmr29_comp95838_c1_seq4	1830	EGI67139	Ants	Acromyrmex echinatior	hypothetical protein G5I_04295
	kmr23_comp75929_c0_seq1	1829	EFN68855	Ants	Camponotus floridanus	Enhancer of mRNA-decapping protein 3
	Ant-TAContig2594	1829	EFN62022	Ants	Camponotus floridanus	Programmed cell death protein 2-like
	kmr27_comp89552_c4_seq2	1828	EFN67469	Ants	Camponotus floridanus	Acetylcholine receptor subunit alpha-like
	kmr23_comp74102_c0_seq1	1824	EFN64697	Ants	Camponotus floridanus	Protein bric-a-brac 1
	kmr27_comp85931_c1_seq1	1823	EFN63383	Ants	Camponotus floridanus	Mitochondrial glutamate carrier 1
	Ant-TAContig10062	1821	EFN64648	Ants	Camponotus floridanus	hypothetical protein EAG_08291
	kmr23_comp68480_c5_seq1	1819	F4WJZ1	Ants	Acromyrmex echinatior	Putative uncharacterized protein
	Ant-TAContig4898	1819	EFN61975	Ants	Camponotus floridanus	Ras GTPase-activating-like protein IQGAP1
	kmr25_comp80399_c0_seq1	1817	EGI70098	Ants	Acromyrmex echinatior	Glutaryl-CoA dehydrogenase, mitochondrial
	kmr29_comp58754_c0_seq1	1815	E2ASE5	Ants	Camponotus floridanus	Phphorylase b kinase gamma catalytic chain, skeletal muscle isoform
	kmr29_comp89739_c0_seq2	1814	E1ZUU6	Ants	Camponotus floridanus	Trypsin-1 (Fragment)
	kmr25_comp84396_c6_seq1	1812	E2A2T8	Ants	Camponotus floridanus	Putative uncharacterized protein
	kmr25_comp77875_c1_seq2	1811	EGI65470	Ants	Acromyrmex echinatior	Neuroguidin-A
	kmr23_comp71844_c0_seq1	1810	E2AK53	Ants	Camponotus floridanus	Retinol dehydrogenase 11
	kmr23_comp34328_c0_seq1	1810	EFN67794	Ants	Camponotus floridanus	U3 small nucleolar RNA-associated protein 15-like protein
	Ant-TAContig74	1808	EFN67569	Ants	Camponotus floridanus	Male-specific lethal-3 protein-like 1
	kmr25_comp60729_c0_seq1	1807	E2AHG0	Ants	Camponotus floridanus	Uncharacterized protein KIAA0152
	kmr23_comp67268_c2_seq1	1806	EFN67498	Ants	Camponotus floridanus	Moesin/ezrin/radixin-like protein 1
	Ant-TAContig2662	1802	EFN88911	Ants	Harpegnathos saltator	hypothetical protein EAI_10856
	kmr23_comp36740_c0_seq1	1802	E2ALI7	Ants	Camponotus floridanus	MYCBP-associated protein
	kmr23_comp37906_c0_seq1	1802	EFN74344	Ants	Camponotus floridanus	Nuclear prelamin A recognition factor-like protein
	kmr23_comp72666_c0_seq1	1802	EFN64233	Ants	Camponotus floridanus	Regulator of chromosome condensation
	Ant-TAContig3370	1801	EFN69848	Ants	Camponotus floridanus	Insulin-like growth factor-binding protein complex acid labile chain
	kmr23_comp36748_c0_seq1	1800	EGI59731	Ants	Acromyrmex echinatior	Histone acetyltransferase Tip60
	kmr23_comp36676_c0_seq1	1800	EFN71669	Ants	Camponotus floridanus	VWFA and cache domain-containing protein 1
	kmr23_comp70888_c0_seq1	1799	EFN69431	Ants	Camponotus floridanus	Nicotinamide riboside kinase 1
	kmr23_comp69514_c1_seq1	1799	EFN75932	Ants	Harpegnathos saltator	Zinc finger FYVE domain-containing protein 26
	kmr25_comp72455_c0_seq2	1796	E2AR99	Ants	Camponotus floridanus	Acyl-CoA synthetase family member 2, mitochondrial
	kmr23_comp63401_c0_seq1	1795	EFN68626	Ants	Camponotus floridanus	cGMP-dependent protein kinase, isozyme 1
	kmr23_comp73763_c0_seq1	1793	EFZ10537	Ants	Solenopsis invicta	hypothetical protein SINV_11902
	kmr23_comp62495_c1_seq1	1792	E2AYU9	Ants	Camponotus floridanus	Putative uncharacterized protein
	kmr25_comp64012_c0_seq1	1790	EFN69271	Ants	Camponotus floridanus	Apoptosis regulator Bcl-X
	Ant-TAContig3981	1789	EFN66103	Ants	Camponotus floridanus	Hamartin
	kmr23_comp51345_c0_seq1	1788	EFN61719	Ants	Camponotus floridanus	hypothetical protein EAG_05856
	kmr23_comp75127_c0_seq1	1788	EFN71965	Ants	Camponotus floridanus	N(4)-(Beta-N-acetylglucosaminyl)-L-asparaginase
	kmr29_comp95009_c0_seq3	1787	E2AED5	Ants	Camponotus floridanus	DOMON domain-containing protein CG14681
	kmr25_comp80862_c0_seq4	1787	EFN73552	Ants	Camponotus floridanus	Dynein intermediate chain, cytosolic
	kmr27_comp91518_c1_seq11	1784	EFN63397	Ants	Camponotus floridanus	Ankyrin-2
	Ant-TAContig6987	1784	EFN67859	Ants	Camponotus floridanus	Inositol monophosphatase 2
	kmr23_comp72531_c0_seq1	1783	EFN68150	Ants	Camponotus floridanus	F-actin-capping protein subunit beta
	kmr23_comp71620_c0_seq1	1782	EFN70980	Ants	Camponotus floridanus	E3 SUMO-protein ligase RanBP2
	kmr23_comp77316_c0_seq1	1782	E2ANY0	Ants	Camponotus floridanus	Esterase FE4
	kmr27_comp87432_c1_seq1	1779	EFN69285	Ants	Camponotus floridanus	ABC transporter G family member 20
	kmr23_comp54464_c0_seq1	1779	EFN65950	Ants	Camponotus floridanus	hypothetical protein EAG_05995
	kmr27_comp56379_c1_seq1	1779	EGI61640	Ants	Acromyrmex echinatior	Lysophospholipid acyltransferase 7
	kmr31_comp3972_c0_seq1	1774	EFN81992	Ants	Harpegnathos saltator	60S ribosomal export protein NMD3
	Ant-TAContig921	1774	EFN61766	Ants	Camponotus floridanus	Acetylcholinesterase
	Ant-TAContig698	1774	EFN74101	Ants	Camponotus floridanus	RNA polymerase II-associated protein 3
	kmr23_comp34313_c0_seq1	1773	EFN61615	Ants	Camponotus floridanus	Alpha-methylacyl-CoA racemase
	Ant-TAContig5682	1773	EFZ15649	Ants	Solenopsis invicta	hypothetical protein SINV_01519
	kmr23_comp46597_c0_seq1	1773	EFN63798	Ants	Camponotus floridanus	Suppressor of fused-like protein
	kmr23_comp72108_c0_seq1	1772	E2A8S0	Ants	Camponotus floridanus	ADP-ribylation factor-like protein 6-interacting protein 4
	kmr27_comp75846_c0_seq1	1771	E2C7K6	Ants	Harathos saltator	Testicular acid phphatase-like protein
	kmr25_comp83731_c1_seq2	1770	EFN73808	Ants	Camponotus floridanus	Peptide-N(4)-(N-acetyl-beta-glucosaminyl)asparagine amidase
	Ant-TAContig4441	1770	EFN68424	Ants	Camponotus floridanus	Protein SET
	kmr23_comp51381_c1_seq1	1770	EFN67783	Ants	Camponotus floridanus	Tubby protein-like protein
	Ant-TAContig4477	1767	EFN74006	Ants	Camponotus floridanus	Fibroblast growth factor receptor 3
	Ant-TAContig6768	1767	EFN65405	Ants	Camponotus floridanus	Splicing factor 3A subunit 3
	kmr27_comp81371_c0_seq1	1766	EFN69793	Ants	Camponotus floridanus	Cytochrome P450 9e2
	kmr23_comp71874_c0_seq1	1765	EFN63824	Ants	Camponotus floridanus	COP9 signalosome complex subunit 4
	kmr23_comp74839_c0_seq1	1765	EGI67268	Ants	Acromyrmex echinatior	Pyruvate dehydrogenase E1 component subunit alpha, somatic form, mitochondrial
	kmr27_comp57106_c1_seq1	1763	EFN74930	Ants	Camponotus floridanus	E3 ubiquitin-protein ligase MARCH8
	kmr23_comp70415_c0_seq1	1763	E2B0E8	Ants	Camponotus floridanus	Endocuticle structural glycoprotein SgAbd-1 (Fragment)
	Ant-TAContig6932	1763	EFN74727	Ants	Camponotus floridanus	UPF0364 protein C6orf211-like protein
	kmr23_comp70997_c0_seq1	1761	EFN71057	Ants	Camponotus floridanus	NEDD4 family-interacting protein 1
	Ant-TAContig5371	1761	EGI68785	Ants	Acromyrmex echinatior	RING finger protein 126-B
	Ant-TAContig316	1760	EFN73744	Ants	Camponotus floridanus	Ras-related protein M-Ras
	kmr23_comp70767_c0_seq1	1760	EFN60453	Ants	Camponotus floridanus	Uncharacterized protein C6orf106-like protein
	kmr23_comp33827_c0_seq1	1758	EFN61121	Ants	Camponotus floridanus	Coiled-coil domain-containing protein 6
	kmr29_comp86306_c2_seq1	1757	E2AYB1	Ants	Camponotus floridanus	Dual specificity protein phphatase 19
	kmr23_comp82941_c0_seq1	1757	EFN62801	Ants	Camponotus floridanus	Protein deadpan
	Ant-TAContig445	1756	EFN70837	Ants	Camponotus floridanus	Chitobiosyldiphosphodolichol beta-mannosyltransferase
	kmr25_comp57041_c0_seq1	1756	EFN70169	Ants	Camponotus floridanus	hypothetical protein EAG_01486
	kmr23_comp85086_c0_seq1	1755	EGI63522	Ants	Acromyrmex echinatior	hypothetical protein G5I_08040
	kmr29_comp96835_c2_seq1	1751	EFN64270	Ants	Camponotus floridanus	Fumarylacetoacetate hydrolase domain-containing protein 2A
	Ant-TAContig3995	1750	EFN85363	Ants	Harpegnathos saltator	Protein yellow
	kmr29_comp56034_c0_seq1	1749	EFZ14965	Ants	Solenopsis invicta	hypothetical protein SINV_03862
	kmr23_comp74317_c0_seq1	1748	EFN67567	Ants	Camponotus floridanus	Glucose-fructose oxidoreductase domain-containing protein 1
	kmr27_comp56567_c0_seq1	1747	EFN73097	Ants	Camponotus floridanus	Transmembrane and ubiquitin-like domain-containing protein 2
	Ant-TAContig4932	1746	EFN64781	Ants	Camponotus floridanus	Dynein heavy chain 3, axonemal
	kmr25_comp84008_c0_seq1	1746	EFZ21967	Ants	Solenopsis invicta	hypothetical protein SINV_07382
	kmr23_comp52138_c1_seq1	1746	EFN69159	Ants	Camponotus floridanus	RalBP1-associated Eps domain-containing protein 1
	kmr27_comp91174_c2_seq30	1745	EFN74932	Ants	Camponotus floridanus	Serine/threonine-protein kinase mig-15
	kmr25_comp84701_c1_seq1	1744	EFN60405	Ants	Camponotus floridanus	Retinoblastoma-binding protein 6
	Ant-TAContig5921	1743	EFZ21721	Ants	Solenopsis invicta	hypothetical protein SINV_11548
	kmr23_comp72221_c0_seq1	1742	EFN64026	Ants	Camponotus floridanus	Esterase E4
	kmr23_comp33680_c1_seq1	1740	EGI69102	Ants	Acromyrmex echinatior	Cytosol aminopeptidase
	kmr25_comp80431_c0_seq1	1740	E2A6P1	Ants	Camponotus floridanus	Putative uncharacterized protein
	kmr23_comp52823_c0_seq1	1740	EFN75193	Ants	Harpegnathos saltator	Uncharacterized protein KIAA0513
	kmr29_comp71026_c0_seq1	1739	EFN74235	Ants	Camponotus floridanus	Protein phosphatase 1D
	kmr23_comp68863_c0_seq1	1738	EFN71124	Ants	Camponotus floridanus	Vacuolar proton pump subunit G
	kmr23_comp74478_c0_seq1	1737	EFZ10445	Ants	Solenopsis invicta	hypothetical protein SINV_06495
	kmr23_comp35690_c0_seq1	1737	EFN68428	Ants	Camponotus floridanus	Integrator complex subunit 12
	kmr27_comp88392_c0_seq1	1736	E9IXY8	Ants	Solenopsis invicta	Putative uncharacterized protein (Fragment)
	kmr23_comp47909_c0_seq1	1736	EFN74897	Ants	Camponotus floridanus	Serine/threonine-protein kinase SMG1
	kmr23_comp72260_c0_seq1	1735	EGI70161	Ants	Acromyrmex echinatior	Beta-1,3-galactosyltransferase 5
	kmr25_comp79610_c0_seq1	1735	EFN60440	Ants	Camponotus floridanus	hypothetical protein EAG_01913
	kmr23_comp72696_c0_seq1	1735	EFN68909	Ants	Camponotus floridanus	hypothetical protein EAG_03486
	Ant-TAContig551	1734	EFN62388	Ants	Camponotus floridanus	Glycine N-methyltransferase
	kmr23_comp34681_c0_seq1	1733	EGI63948	Ants	Acromyrmex echinatior	Co-chaperone protein HscB, mitochondrial
	kmr23_comp72107_c0_seq1	1732	EFN74338	Ants	Camponotus floridanus	WD repeat-containing protein 46
	kmr23_comp73491_c0_seq1	1731	EFN73649	Ants	Camponotus floridanus	hypothetical protein EAG_08446
	kmr23_comp59813_c0_seq1	1731	E2A3U8	Ants	Camponotus floridanus	Serine-protein kinase ATM
	kmr23_comp72613_c0_seq1	1729	EFN65651	Ants	Camponotus floridanus	Plasma glutamate carboxypeptidase
	kmr27_comp88216_c0_seq1	1727	E1ZZW5	Ants	Camponotus floridanus	Putative uncharacterized protein
	kmr25_comp77602_c0_seq1	1727	E2AMW5	Ants	Camponotus floridanus	Trafficking protein particle complex subunit 5
	kmr27_comp87824_c0_seq1	1725	E2A728	Ants	Camponotus floridanus	Glutamate-rich WD repeat-containing protein 1
	kmr25_comp79173_c0_seq1	1725	E2AHW1	Ants	Camponotus floridanus	Isovaleryl-CoA dehydrogenase, mitochondrial
	kmr29_comp91032_c2_seq1	1724	E2AX39	Ants	Camponotus floridanus	Putative uncharacterized protein
	Ant-TAContig5994	1723	EFN60377	Ants	Camponotus floridanus	hypothetical protein EAG_02089
	kmr23_comp63528_c0_seq1	1723	EFN62413	Ants	Camponotus floridanus	Vacuolar protein sorting-associated protein 13D
	kmr23_comp71238_c0_seq1	1721	EFN61326	Ants	Camponotus floridanus	Protein disulfide-isomerase A6
	Ant-TAContig4604	1721	EGI58933	Ants	Acromyrmex echinatior	Protein tipE
	kmr29_comp92902_c0_seq2	1720	EFN70573	Ants	Camponotus floridanus	hypothetical protein EAG_02805
	Ant-TAContig841	1720	EFN69868	Ants	Camponotus floridanus	Polycomb group RING finger protein 3
	kmr29_comp86074_c0_seq1	1720	EFN72824	Ants	Camponotus floridanus	tRNA-splicing endonuclease subunit Sen2
	kmr29_comp96223_c0_seq2	1719	EFN69813	Ants	Camponotus floridanus	Probable multidrug resistance-associated protein lethal(2)03659
	Ant-TAContig4503	1719	EFN63813	Ants	Camponotus floridanus	T-cell leukemia homeobox protein 3
	kmr23_comp72092_c0_seq1	1719	EFN71063	Ants	Camponotus floridanus	Tubulin beta chain
	kmr27_comp90778_c0_seq9	1718	EFN68123	Ants	Camponotus floridanus	Glypican-6
	kmr23_comp34883_c1_seq1	1715	EFN63106	Ants	Camponotus floridanus	Signal recognition particle 68 kDa protein
	Ant-TAContig11894	1714	EFN62213	Ants	Camponotus floridanus	Neuromedin-B receptor
	kmr23_comp72757_c0_seq1	1713	EFN71934	Ants	Camponotus floridanus	Syntenin-1
	kmr23_comp72905_c0_seq1	1711	EFN70870	Ants	Camponotus floridanus	Fatty acyl-CoA reductase 1
	kmr23_comp34306_c0_seq1	1709	EFN69966	Ants	Camponotus floridanus	DNA replication licensing factor MCM4
	kmr23_comp78858_c0_seq1	1709	EFN70345	Ants	Camponotus floridanus	Probable succinyl-CoA ligase [GDP-forming] subunit beta, mitochondrial
	kmr25_comp62246_c0_seq1	1708	EFN74846	Ants	Camponotus floridanus	Synaptic glycoprotein SC2
	kmr23_comp72228_c0_seq1	1707	EFN73812	Ants	Camponotus floridanus	Hsp70-binding protein 1
	kmr23_comp68028_c2_seq1	1705	EGI62219	Ants	Acromyrmex echinatior	Leucine-rich repeat-containing protein 70
	kmr23_comp37217_c0_seq1	1705	EFN61973	Ants	Camponotus floridanus	Nucleoporin-like protein RIP
	Ant-TAContig6055	1705	EFN74815	Ants	Camponotus floridanus	Tryptophanyl-tRNA synthetase, cytoplasmic
	kmr23_comp75677_c0_seq1	1700	EFN63876	Ants	Camponotus floridanus	Armadillo repeat-containing protein 6
	kmr27_comp91199_c3_seq36	1700	E2AAP4	Ants	Camponotus floridanus	NECAP-like protein CG9132
	kmr23_comp56861_c2_seq1	1700	EFN62179	Ants	Camponotus floridanus	Uncharacterized protein C8orf32-like protein
	kmr27_comp89824_c0_seq7	1698	EFN78202	Ants	Harpegnathos saltator	Acyl-CoA synthetase short-chain family member 3, mitochondrial
	kmr27_comp87722_c1_seq2	1698	F4X7V0	Ants	Acromyrmex echinatior	GATA-binding factor A
	kmr23_comp73088_c0_seq1	1697	EFN65270	Ants	Camponotus floridanus	DNA polymerase delta small subunit
	kmr25_comp80667_c1_seq1	1697	F4WP12	Ants	Acromyrmex echinatior	Heterogeneous nuclear ribonucleoprotein L
	kmr25_comp58098_c0_seq1	1695	EFN68212	Ants	Camponotus floridanus	Amnionless protein
	kmr23_comp53619_c2_seq1	1694	EGI67320	Ants	Acromyrmex echinatior	Chromatin assembly factor 1 subunit A-B
	kmr23_comp75076_c0_seq1	1694	EFN66916	Ants	Camponotus floridanus	Fatty-acid amide hydrolase 2
	Ant-TAContig2454	1693	EGI63769	Ants	Acromyrmex echinatior	BRCA1-associated RING domain protein 1
	kmr23_comp72484_c0_seq1	1693	EFN63178	Ants	Camponotus floridanus	GPN-loop GTPase 2
	kmr31_comp529_c0_seq1	1692	EFN70962	Ants	Camponotus floridanus	KIN, antigenic determinant of recA protein-like protein
	kmr29_comp82751_c1_seq1	1691	EFN70346	Ants	Camponotus floridanus	Filamin-B
	Ant-TAContig10697	1691	EFN63587	Ants	Camponotus floridanus	Peripheral plasma membrane protein CASK
	kmr23_comp59978_c0_seq1	1691	E1ZWW9	Ants	Camponotus floridanus	Popeye domain-containing protein 2
	kmr29_comp94827_c1_seq7	1690	E2AIB2	Ants	Camponotus floridanus	Ankyrin repeat domain-containing protein 56
	Ant-TAContig8926	1690	EFN62435	Ants	Camponotus floridanus	hypothetical protein EAG_01626
	kmr23_comp54190_c2_seq1	1690	EFN70212	Ants	Camponotus floridanus	Peroxisomal N(1)-acetyl-spermine/spermidine oxidase
	kmr23_comp35626_c0_seq1	1686	EFN70890	Ants	Camponotus floridanus	Alpha-1,3-mannosyltransferase ALG2
	kmr29_comp90859_c2_seq1	1686	EFN64124	Ants	Camponotus floridanus	Neuropeptides capa receptor
	kmr25_comp85080_c2_seq1	1686	E2B185	Ants	Camponotus floridanus	Putative uncharacterized protein
	kmr25_comp72014_c0_seq3	1684	F4WH17	Ants	Acromyrmex echinatior	Glyceraldehyde-3-phphate dehydrogenase
	kmr23_comp34658_c0_seq1	1684	E2B156	Ants	Camponotus floridanus	Replication factor C subunit 1
	kmr27_comp88021_c0_seq1	1684	EFN63869	Ants	Camponotus floridanus	Single-minded-like protein 1
	kmr23_comp72122_c0_seq1	1682	EFN71388	Ants	Camponotus floridanus	Ribonuclease H2 subunit B
	kmr23_comp71005_c0_seq1	1681	E2AX68	Ants	Camponotus floridanus	Transmembrane emp24 domain-containing protein
	kmr29_comp88297_c0_seq1	1680	E2A5E7	Ants	Camponotus floridanus	Elongator complex protein 4
	Ant-TAContig6866	1680	EFN68286	Ants	Camponotus floridanus	Nuclear transcription factor Y subunit gamma
	Ant-TAContig6777	1680	EFN65524	Ants	Camponotus floridanus	Probable dynactin subunit 2
	kmr23_comp73522_c0_seq1	1679	EFN67546	Ants	Camponotus floridanus	Putative S-adenosyl-L-methionine-dependent methyltransferase CG14683
	kmr23_comp75172_c0_seq1	1678	EFN62947	Ants	Camponotus floridanus	hypothetical protein EAG_02928
	Ant-TAContig3130	1677	EFN73872	Ants	Camponotus floridanus	hypothetical protein EAG_09975
	kmr23_comp71370_c0_seq1	1677	EFN61629	Ants	Camponotus floridanus	Protein henna
	Ant-TAContig4376	1676	EFN63977	Ants	Camponotus floridanus	Adenylate cyclase type 10
	kmr23_comp71459_c0_seq1	1675	EFN71625	Ants	Camponotus floridanus	Voltage-dependent anion-selective channel protein 2
	kmr23_comp75007_c0_seq1	1674	EFN71864	Ants	Camponotus floridanus	Protein HEXIM1
	Ant-TAContig4939	1674	EFN73892	Ants	Camponotus floridanus	U3 small nucleolar RNA-interacting protein 2
	kmr23_comp76274_c0_seq1	1672	E2A255	Ants	Camponotus floridanus	Arrestin-like protein
	kmr23_comp74779_c0_seq1	1672	EFN74173	Ants	Camponotus floridanus	hypothetical protein EAG_14085
	kmr29_comp91135_c0_seq1	1672	E2A4D5	Ants	Camponotus floridanus	Putative uncharacterized protein
	kmr25_comp78374_c0_seq1	1672	EFN70408	Ants	Camponotus floridanus	Segmentation protein Runt
	Ant-TAContig1051	1671	EFN66436	Ants	Camponotus floridanus	Ribokinase
	kmr27_comp78860_c0_seq1	1670	EFN74152	Ants	Camponotus floridanus	Peptidyl-prolyl cis-trans isomerase SDCCAG10
	kmr23_comp80280_c0_seq1	1667	EFN61434	Ants	Camponotus floridanus	hypothetical protein EAG_10810
	Ant-TAContig356	1666	EFN67028	Ants	Camponotus floridanus	Kynurenine--oxoglutarate transaminase 3
	kmr23_comp72733_c0_seq1	1665	EFN73425	Ants	Camponotus floridanus	mRNA-capping enzyme
	Ant-TAContig2133	1665	EFN82583	Ants	Harpegnathos saltator	Troponin C, isoform 1
	Ant-TAContig5491	1664	EFN61521	Ants	Camponotus floridanus	Calcium/calmodulin-dependent protein kinase kinase 2
	kmr25_comp83855_c0_seq3	1664	EFN70144	Ants	Camponotus floridanus	Solute carrier family 22 member 8
	Ant-TAContig2709	1663	EFN70931	Ants	Camponotus floridanus	28S ribosomal protein S29, mitochondrial
	kmr25_comp80746_c0_seq2	1663	E2AF18	Ants	Camponotus floridanus	Double-stranded RNA-specific editase Adar
	Ant-TAContig5546	1663	EFN84515	Ants	Harpegnathos saltator	Gonadotropin-releasing hormone II receptor
	Ant-TAContig4248	1662	EFN67874	Ants	Camponotus floridanus	E3 ubiquitin-protein ligase RNF25
	kmr25_comp82453_c1_seq1	1661	EFN67643	Ants	Camponotus floridanus	Glycerate kinase
	kmr25_comp82749_c0_seq1	1661	E2AZM1	Ants	Camponotus floridanus	HEAT repeat-containing protein C7orf27
	Ant-TAContig3982	1660	EFN64158	Ants	Camponotus floridanus	RNA-binding protein squid
	kmr27_comp84875_c0_seq2	1659	EFN74504	Ants	Camponotus floridanus	hypothetical protein EAG_03554
	kmr23_comp73990_c0_seq1	1658	E2A9L0	Ants	Camponotus floridanus	Lariat debranching enzyme
	kmr23_comp73416_c0_seq1	1657	EFN69673	Ants	Camponotus floridanus	hypothetical protein EAG_12011
	kmr23_comp71269_c0_seq1	1657	EGI57653	Ants	Acromyrmex echinatior	hypothetical protein G5I_14178
	kmr25_comp66761_c0_seq1	1657	E2AAN9	Ants	Camponotus floridanus	SAP30-binding protein
	kmr25_comp71932_c0_seq1	1656	E2A7Y5	Ants	Camponotus floridanus	Nitrilase-like protein 2
	Ant-TAContig5575	1656	EFN63717	Ants	Camponotus floridanus	Sugar transporter ERD6-like 6
	Ant-TAContig4709	1655	EFN69156	Ants	Camponotus floridanus	Probable hydroxyacid-oxoacid transhydrogenase, mitochondrial
	kmr23_comp70391_c0_seq1	1654	EFN68970	Ants	Camponotus floridanus	Protein pellino
	kmr23_comp34872_c0_seq1	1654	E2AQ06	Ants	Camponotus floridanus	WD repeat-containing protein 33
	kmr29_comp91614_c3_seq1	1652	EGI68602	Ants	Acromyrmex echinatior	High-affinity choline transporter 1
	kmr23_comp62371_c1_seq1	1652	EFN70765	Ants	Camponotus floridanus	N-acetyltransferase UNQ2771/PRO7155-like protein
	kmr23_comp33633_c1_seq1	1651	EFN63056	Ants	Camponotus floridanus	Band 4.1-like protein 5
	kmr31_comp5659_c0_seq1	1651	EFN68827	Ants	Camponotus floridanus	Serine palmitoyltransferase 1
	kmr23_comp71849_c0_seq1	1650	EFN71704	Ants	Camponotus floridanus	28S ribosomal protein S27, mitochondrial
	kmr23_comp71778_c0_seq1	1650	EFN68306	Ants	Camponotus floridanus	Coiled-coil domain-containing protein 55
	kmr23_comp74858_c0_seq1	1650	EFN67967	Ants	Camponotus floridanus	mTERF domain-containing protein 1, mitochondrial
	kmr23_comp40882_c0_seq1	1650	E9IUG0	Ants	Solenopsis invicta	Putative uncharacterized protein (Fragment)
	kmr23_comp94667_c0_seq1	1649	EFN60399	Ants	Camponotus floridanus	Transcription factor SOX-8
	kmr25_comp71969_c0_seq1	1647	E2A3P5	Ants	Camponotus floridanus	AP-3 complex subunit mu-1
	kmr23_comp50014_c0_seq1	1647	EFN64597	Ants	Camponotus floridanus	Carbohydrate sulfotransferase 11
	kmr23_comp73859_c0_seq1	1646	EFN61463	Ants	Camponotus floridanus	Actin-like protein 6A
	kmr25_comp85259_c1_seq11	1646	EFN64667	Ants	Camponotus floridanus	Protein msta, isoform B
	kmr25_comp85247_c3_seq3	1646	E1ZZT2	Ants	Camponotus floridanus	Putative uncharacterized protein
	Ant-TAContig4552	1644	EFN73326	Ants	Camponotus floridanus	hypothetical protein EAG_05558
	Ant-TAContig7780	1643	EFN72398	Ants	Camponotus floridanus	hypothetical protein EAG_12533
	Ant-TAContig5030	1642	EFN62338	Ants	Camponotus floridanus	hypothetical protein EAG_15413
	kmr23_comp75371_c0_seq1	1642	EFN66731	Ants	Camponotus floridanus	LIX1-like protein
	Ant-TAContig2706	1639	EGI59025	Ants	Acromyrmex echinatior	Aromatic-L-amino-acid decarboxylase
	kmr23_comp67822_c2_seq1	1639	EGI68212	Ants	Acromyrmex echinatior	RING finger protein 31
	Ant-TAContig8010	1638	EFN71879	Ants	Camponotus floridanus	Protein I'm not dead yet
	kmr23_comp73613_c0_seq1	1636	EFN82867	Ants	Harpegnathos saltator	Epidermal retinal dehydrogenase 2
	kmr29_comp86845_c0_seq1	1636	EFN60203	Ants	Camponotus floridanus	Transport and Golgi organization protein 11
	Ant-TAContig240	1635	EFN73041	Ants	Camponotus floridanus	hypothetical protein EAG_11334
	kmr23_comp71917_c0_seq1	1635	EFN67808	Ants	Camponotus floridanus	Protein within the bgcn gene intron
	kmr23_comp71532_c0_seq1	1635	EGI66983	Ants	Acromyrmex echinatior	Rho GDP-dissociation inhibitor 1
	kmr25_comp84711_c1_seq1	1635	H9HIN2	Ants	Atta cephalotes	Uncharacterized protein
	kmr23_comp63546_c1_seq1	1634	E2C1W1	Ants	Harathos saltator	Lysyl oxidase-like protein 4
	kmr23_comp56132_c0_seq1	1633	EFN70794	Ants	Camponotus floridanus	Carbohydrate sulfotransferase 14
	Ant-TAContig5898	1633	EFN74196	Ants	Camponotus floridanus	SEC14-like protein 2
	kmr25_comp39234_c0_seq1	1632	EFN64644	Ants	Camponotus floridanus	hypothetical protein EAG_08287
	kmr23_comp76237_c0_seq1	1632	EFN68818	Ants	Camponotus floridanus	hypothetical protein EAG_15898
	kmr25_comp40618_c0_seq1	1632	EFZ22786	Ants	Solenopsis invicta	hypothetical protein SINV_02694
	kmr23_comp69024_c1_seq1	1628	EFN72797	Ants	Camponotus floridanus	hypothetical protein EAG_03736
	kmr23_comp70979_c0_seq1	1628	E1ZW93	Ants	Camponotus floridanus	Putative uncharacterized protein
	kmr23_comp37471_c0_seq1	1625	E2A791	Ants	Camponotus floridanus	Probable ubiquitin-conjugating enzyme E2 CG4502
	kmr27_comp85004_c0_seq1	1625	F4W4Y2	Ants	Acromyrmex echinatior	Putative deoxyhypusine synthase (Fragment)
	kmr25_comp87863_c0_seq1	1624	EFN65671	Ants	Camponotus floridanus	Major royal jelly protein 1
	kmr27_comp41526_c0_seq1	1623	EFN71349	Ants	Camponotus floridanus	Histone H1-delta
	Ant-TAContig5446	1622	EGI62871	Ants	Acromyrmex echinatior	UPF0465 protein C5orf33-like protein
	kmr27_comp90292_c0_seq3	1621	EGI59456	Ants	Acromyrmex echinatior	Group 3 secretory phospholipase A2
	kmr23_comp34126_c0_seq1	1620	EFN68973	Ants	Camponotus floridanus	Heparin sulfate O-sulfotransferase
	kmr23_comp70730_c0_seq1	1620	E2AE86	Ants	Camponotus floridanus	Proteasome subunit alpha type
	kmr23_comp71415_c0_seq1	1619	EFN74865	Ants	Camponotus floridanus	26S proteasome non-ATPase regulatory subunit 6
	Ant-TAContig4238	1618	EFN68392	Ants	Camponotus floridanus	Malate dehydrogenase, mitochondrial
	kmr29_comp88456_c0_seq5	1618	E2B1D1	Ants	Camponotus floridanus	U2-associated protein SR140
	kmr25_comp85477_c1_seq2	1618	EFN75897	Ants	Harpegnathos saltator	Whirlin
	Ant-TAContig276	1617	EFN68193	Ants	Camponotus floridanus	Ketohexokinase
	Ant-TAContig2217	1616	EFN66892	Ants	Camponotus floridanus	Fatty acyl-CoA reductase 1
	Ant-TAContig8445	1616	EFN70966	Ants	Camponotus floridanus	Rap guanine nucleotide exchange factor 2
	Ant-TAContig4810	1615	EFN73690	Ants	Camponotus floridanus	Arfaptin-2
	Ant-TAContig730	1615	EFN68560	Ants	Camponotus floridanus	Cytochrome P450 307a1
	kmr25_comp81227_c0_seq1	1611	EFN68368	Ants	Camponotus floridanus	hypothetical protein EAG_10341
	kmr23_comp68979_c0_seq1	1611	EFN67957	Ants	Camponotus floridanus	hypothetical protein EAG_10495
	kmr23_comp69934_c0_seq1	1611	EFN65828	Ants	Camponotus floridanus	Inositol polyphosphate multikinase
	Ant-TAContig6764	1611	EFN70879	Ants	Camponotus floridanus	Probable ribosome production factor 1
	kmr23_comp71663_c0_seq1	1611	EFN62621	Ants	Camponotus floridanus	RNA-binding protein with serine-rich domain 1
	kmr23_comp75264_c0_seq1	1611	EFN67103	Ants	Camponotus floridanus	WD repeat-containing protein 68
	kmr23_comp73712_c0_seq1	1610	E1ZYN2	Ants	Camponotus floridanus	Aminomethyltransferase
	Ant-TAContig836	1610	EGI70650	Ants	Acromyrmex echinatior	Gamma-soluble NSF attachment protein
	kmr25_comp80495_c0_seq3	1610	E2B1E8	Ants	Camponotus floridanus	Splicing factor, arginine/serine-rich 17A
	Ant-TAContig3108	1608	EFN65821	Ants	Camponotus floridanus	Peptide chain release factor 1-like, mitochondrial
	kmr25_comp39351_c0_seq1	1607	E1ZUU8	Ants	Camponotus floridanus	Elongation factor 1-delta
	kmr25_comp72704_c0_seq1	1607	E2A9I8	Ants	Camponotus floridanus	Putative serine/threonine-protein kinase C05D10.2
	kmr23_comp71084_c0_seq1	1605	EFN62415	Ants	Camponotus floridanus	Nucleic-acid-binding protein from transposon X-element
	Ant-TAContig5449	1605	EFN69757	Ants	Camponotus floridanus	Short/branched chain specific acyl-CoA dehydrogenase, mitochondrial
	kmr23_comp63931_c0_seq1	1605	EFN73295	Ants	Camponotus floridanus	Uncharacterized protein FLJ21062
	kmr29_comp88862_c0_seq1	1602	EFN73706	Ants	Camponotus floridanus	hypothetical protein EAG_15141
	kmr29_comp89398_c1_seq1	1601	E2A2Q7	Ants	Camponotus floridanus	Actin, clone 403
	Ant-TAContig1348	1601	EFN73186	Ants	Camponotus floridanus	COP9 signalosome complex subunit 8
	kmr29_comp94459_c0_seq5	1600	EFN72700	Ants	Camponotus floridanus	RAG1-activating protein 1-like protein
	kmr25_comp82462_c0_seq1	1596	E2A5J8	Ants	Camponotus floridanus	Enhancer of split mgamma protein
	Ant-TAContig5195	1595	EFN70028	Ants	Camponotus floridanus	Protein YIF1B
	kmr23_comp69448_c7_seq1	1595	EFN64029	Ants	Camponotus floridanus	Titin
	kmr23_comp75159_c0_seq1	1594	EFN61030	Ants	Camponotus floridanus	Diphthamide biosynthesis protein 1
	Ant-TAContig1668	1594	EFN68019	Ants	Camponotus floridanus	Regulating synaptic membrane exocytosis protein 2
	kmr27_comp87221_c0_seq1	1592	E2AGL4	Ants	Camponotus floridanus	Guanine nucleotide-binding protein subunit beta-like protein 1
	kmr23_comp59813_c1_seq1	1592	EFN71892	Ants	Camponotus floridanus	Serine-protein kinase ATM
	kmr23_comp77631_c0_seq1	1591	EFN71760	Ants	Camponotus floridanus	Coiled-coil domain-containing protein 149
	kmr25_comp72468_c0_seq1	1591	EFZ10640	Ants	Solenopsis invicta	hypothetical protein SINV_04382
	Ant-TAContig5068	1590	EFZ21825	Ants	Solenopsis invicta	hypothetical protein SINV_10994
	kmr23_comp73414_c0_seq1	1590	EFN67700	Ants	Camponotus floridanus	Peroxisomal membrane protein PEX13
	kmr27_comp91179_c0_seq8	1588	E2AVH6	Ants	Camponotus floridanus	Dimethyladenine transferase 2, mitochondrial
	kmr23_comp34219_c0_seq1	1588	EFN73967	Ants	Camponotus floridanus	hypothetical protein EAG_05211
	kmr27_comp91506_c1_seq22	1587	EFN71553	Ants	Camponotus floridanus	hypothetical protein EAG_14231
	kmr29_comp86661_c0_seq1	1587	E2A564	Ants	Camponotus floridanus	Prtaglandin E2 receptor EP4 subtype
	kmr23_comp76267_c0_seq1	1587	EFN66555	Ants	Camponotus floridanus	Uncharacterized protein C2orf32-like protein
	kmr23_comp36857_c0_seq1	1586	E2AI69	Ants	Camponotus floridanus	Acylphphatase-2
	kmr23_comp33742_c0_seq1	1586	EFN71866	Ants	Camponotus floridanus	Growth hormone-regulated TBC protein 1-A
	kmr23_comp74519_c0_seq1	1586	EFN64646	Ants	Camponotus floridanus	hypothetical protein EAG_08289
	Ant-TAContig4340	1585	EFN63784	Ants	Camponotus floridanus	Cytochrome b5 domain-containing protein 2
	Ant-TAContig11862	1584	EFN86646	Ants	Harpegnathos saltator	Retinoblastoma-binding protein 5
	kmr25_comp82810_c1_seq1	1583	F4WCE4	Ants	Acromyrmex echinatior	Coiled-coil domain-containing protein 104
	Ant-TAContig2937	1580	EFN62834	Ants	Camponotus floridanus	Bifunctional methylenetetrahydrofolate dehydrogenase/cyclohydrolase, mitochondrial
	kmr23_comp73707_c0_seq1	1580	EFN73591	Ants	Camponotus floridanus	Dipeptidase 1
	kmr23_comp68585_c5_seq1	1580	EFN66548	Ants	Camponotus floridanus	hypothetical protein EAG_11043
	kmr23_comp68018_c2_seq1	1580	EFN68397	Ants	Camponotus floridanus	Signal peptide peptidase-like 3
	kmr29_comp96417_c0_seq29	1580	E2ALL7	Ants	Camponotus floridanus	Transmembrane protein 63B
	kmr23_comp76347_c0_seq1	1579	EFN71493	Ants	Camponotus floridanus	hypothetical protein EAG_14433
	kmr25_comp83278_c0_seq1	1578	EFZ11860	Ants	Solenopsis invicta	hypothetical protein SINV_09041
	kmr23_comp72865_c0_seq1	1578	EFN60317	Ants	Camponotus floridanus	Rootletin
	kmr23_comp72047_c0_seq1	1578	EFN70965	Ants	Camponotus floridanus	U4/U6.U5 tri-snRNP-associated protein 2
	Ant-TAContig2673	1576	EFN71226	Ants	Camponotus floridanus	Charged multivesicular body protein 4b
	kmr25_comp72528_c0_seq1	1575	F4WRB1	Ants	Acromyrmex echinatior	Antichymotrypsin-2
	kmr25_comp61974_c0_seq2	1575	E2AUT9	Ants	Camponotus floridanus	Myin-2 essential light chain
	kmr23_comp88930_c0_seq1	1575	EFN68798	Ants	Camponotus floridanus	Protein phosphatase PHLPP-like protein
	kmr23_comp37351_c0_seq1	1572	E2A0E7	Ants	Camponotus floridanus	Ras-related protein Rab-7a
	kmr23_comp72084_c0_seq1	1572	EFN74151	Ants	Camponotus floridanus	T-cell acute lymphocytic leukemia protein 1
	kmr23_comp70754_c0_seq1	1571	EFN61442	Ants	Camponotus floridanus	Pentatricopeptide repeat-containing protein 2
	kmr23_comp55869_c1_seq1	1571	EGI70686	Ants	Acromyrmex echinatior	Serine/threonine-protein kinase Nek5
	kmr27_comp86358_c1_seq1	1571	EFN62361	Ants	Camponotus floridanus	Uncharacterized protein C20orf103
	Ant-TAContig2125	1571	EFN69961	Ants	Camponotus floridanus	WW domain-binding protein 4
	kmr27_comp91491_c3_seq21	1570	E2AXL1	Ants	Camponotus floridanus	Cytolic carboxypeptidase 1
	kmr23_comp89776_c0_seq1	1569	E2ADM5	Ants	Camponotus floridanus	Kinesin-like protein KIF17
	kmr23_comp73618_c0_seq1	1568	EFN69362	Ants	Camponotus floridanus	Protein farnesyltransferase/geranylgeranyltransferase type-1 subunit alpha
	kmr23_comp34620_c0_seq1	1566	EGI69283	Ants	Acromyrmex echinatior	hypothetical protein G5I_02049
	kmr23_comp74398_c0_seq1	1564	EFN61709	Ants	Camponotus floridanus	Carboxypeptidase B
	kmr23_comp72521_c0_seq1	1564	EFN74088	Ants	Camponotus floridanus	GRIP and coiled-coil domain-containing protein 1
	kmr23_comp72105_c0_seq1	1564	EFN65649	Ants	Camponotus floridanus	hypothetical protein EAG_10906
	kmr25_comp88086_c0_seq1	1564	EGI64301	Ants	Acromyrmex echinatior	SET and MYND domain-containing protein 3
	kmr25_comp81850_c0_seq4	1564	E2A9Y5	Ants	Camponotus floridanus	Transmembrane protein 129
	kmr23_comp64744_c1_seq1	1563	EFN64198	Ants	Camponotus floridanus	Ral guanine nucleotide dissociation stimulator-like 1
	Ant-TAContig3074	1563	EFN67968	Ants	Camponotus floridanus	Transmembrane protein 18
	kmr25_comp82909_c1_seq1	1560	E2AU74	Ants	Camponotus floridanus	Paramyin, short form
	Ant-TAContig509	1560	EFN69191	Ants	Camponotus floridanus	Probable cytochrome P450 6a13
	kmr23_comp63877_c1_seq1	1558	F4X2E7	Ants	Acromyrmex echinatior	Endoplasmic reticulum protein ERp29
	kmr31_comp4943_c0_seq1	1558	EFN70896	Ants	Camponotus floridanus	Seryl-tRNA synthetase, mitochondrial
	Ant-TAContig3283	1557	EFN62324	Ants	Camponotus floridanus	Peptidyl-alpha-hydroxyglycine alpha-amidating lyase 2
	kmr23_comp68336_c2_seq1	1556	E9I8C9	Ants	Solenopsis invicta	Putative uncharacterized protein (Fragment)
	kmr27_comp86679_c0_seq1	1555	EFN74053	Ants	Camponotus floridanus	Mannose-P-dolichol utilization defect 1 protein-like protein
	kmr25_comp57074_c0_seq1	1555	EFN67566	Ants	Camponotus floridanus	Replication factor C subunit 2
	kmr23_comp76337_c0_seq1	1555	EFN71254	Ants	Camponotus floridanus	Tetratricopeptide repeat protein 19
	Ant-TAContig11703	1554	EFN69295	Ants	Camponotus floridanus	60S ribosomal protein L4
	Ant-TAContig2578	1554	EFN74188	Ants	Camponotus floridanus	T-box protein 2
	kmr23_comp77875_c0_seq1	1554	EFN67225	Ants	Camponotus floridanus	Tektin-4
	kmr23_comp72986_c0_seq1	1553	EFN68318	Ants	Camponotus floridanus	Serum response factor-binding protein 1
	kmr23_comp34080_c1_seq1	1553	EFN60378	Ants	Camponotus floridanus	Signal transducing adapter molecule 1
	Ant-TAContig11887	1552	EFN70415	Ants	Camponotus floridanus	NAD kinase
	kmr23_comp76607_c0_seq1	1552	EFN84473	Ants	Harpegnathos saltator	Pre-mRNA cleavage complex II protein Clp1
	kmr23_comp63261_c2_seq1	1551	EFN72399	Ants	Camponotus floridanus	Ubiquitin carboxyl-terminal hydrolase 34
	kmr29_comp93678_c1_seq1	1549	E2AXK9	Ants	Camponotus floridanus	Putative uncharacterized protein
	kmr23_comp76129_c0_seq1	1548	EFN65772	Ants	Camponotus floridanus	UPF0557 protein C10orf119-like protein
	kmr23_comp76137_c0_seq1	1547	EFN68672	Ants	Camponotus floridanus	Dihydroorotate dehydrogenase, mitochondrial
	kmr25_comp83773_c1_seq4	1547	EFZ13188	Ants	Solenopsis invicta	hypothetical protein SINV_02452
	kmr23_comp47844_c1_seq1	1547	EFN68168	Ants	Camponotus floridanus	Serine protease inhibitor dipetalogastin
	kmr23_comp73569_c0_seq1	1547	E2AJJ7	Ants	Camponotus floridanus	WD repeat-containing protein 57
	kmr23_comp70281_c0_seq1	1545	EFN61436	Ants	Camponotus floridanus	Lambda-crystallin-like protein
	Ant-TAContig38	1540	EFN64570	Ants	Camponotus floridanus	Alkylated DNA repair protein alkB-like protein 6
	Ant-TAContig1021	1539	EFZ20819	Ants	Solenopsis invicta	hypothetical protein SINV_08410
	kmr23_comp71331_c0_seq1	1539	EGI62504	Ants	Acromyrmex echinatior	Lactase-phlorizin hydrolase
	kmr23_comp54415_c1_seq1	1539	EFN67750	Ants	Camponotus floridanus	Transmembrane protein 131
	kmr23_comp56261_c1_seq1	1539	EFN70013	Ants	Camponotus floridanus	WD repeat-containing protein 8
	kmr23_comp71851_c0_seq1	1538	EFN63565	Ants	Camponotus floridanus	Alpha-tocopherol transfer protein-like
	kmr27_comp76315_c0_seq2	1537	EFN70162	Ants	Camponotus floridanus	Eukaryotic translation initiation factor 3 subunit M
	kmr23_comp33932_c2_seq1	1537	EGI67058	Ants	Acromyrmex echinatior	T-complex protein 1 subunit theta
	kmr31_comp4527_c0_seq1	1536	EFN64685	Ants	Camponotus floridanus	RNA-binding protein NOB1
	kmr25_comp83527_c0_seq2	1536	EFN83495	Ants	Harpegnathos saltator	Thyrotropin-releasing hormone-degrading ectoenzyme
	kmr23_comp74454_c0_seq1	1535	EFN70816	Ants	Camponotus floridanus	Actin-like protein 87C
	kmr25_comp70940_c0_seq1	1535	EFN70889	Ants	Camponotus floridanus	Splicing factor 45
	kmr23_comp72526_c0_seq1	1532	EFN72006	Ants	Camponotus floridanus	COP9 signalosome complex subunit 6
	kmr25_comp73212_c1_seq1	1530	E2ARX9	Ants	Camponotus floridanus	Erlin-1
	Ant-TAContig3209	1529	EFN63696	Ants	Camponotus floridanus	Alpha-amylase 1
	kmr23_comp83374_c0_seq1	1525	EFN70026	Ants	Camponotus floridanus	Corticotropin-releasing factor-binding protein
	kmr27_comp77149_c0_seq1	1525	EFN71852	Ants	Camponotus floridanus	hypothetical protein EAG_13678
	Ant-TAContig4675	1525	EFN64572	Ants	Camponotus floridanus	hypothetical protein EAG_14491
	kmr23_comp70554_c0_seq1	1525	EFN73308	Ants	Camponotus floridanus	Putative oxidoreductase yrbE
	Ant-TAContig2652	1524	EFN65989	Ants	Camponotus floridanus	Protein C2orf25, mitochondrial
	kmr25_comp80241_c0_seq1	1524	EFN60634	Ants	Camponotus floridanus	Protein groucho
	kmr29_comp88929_c0_seq1	1523	E2AY81	Ants	Camponotus floridanus	Protein phphatase 1 regulatory subunit 7
	Ant-TAContig2781	1520	EGI65006	Ants	Acromyrmex echinatior	CD151 antigen
	kmr23_comp33074_c0_seq1	1520	EFN74513	Ants	Camponotus floridanus	TM2 domain-containing protein CG10795
	kmr23_comp75148_c0_seq1	1519	EGI70864	Ants	Acromyrmex echinatior	hypothetical protein G5I_00289
	kmr23_comp75094_c0_seq1	1518	EFN67286	Ants	Camponotus floridanus	Circadian clock-controlled protein
	kmr23_comp38198_c1_seq1	1518	EGI62081	Ants	Acromyrmex echinatior	Etoposide-induced protein 2.4-like protein
	Ant-TAContig905	1518	EFN61807	Ants	Camponotus floridanus	Protein yellow
	kmr23_comp71820_c0_seq1	1517	EFN65691	Ants	Camponotus floridanus	Carbonic anhydrase 1
	Ant-TAContig2297	1517	EFN74482	Ants	Camponotus floridanus	Protein RMD5-like protein A
	Ant-TAContig5018	1516	EFN88271	Ants	Harpegnathos saltator	BAG family molecular chaperone regulator 2
	kmr25_comp80800_c1_seq1	1516	E2ATD9	Ants	Camponotus floridanus	Zinc finger protein 622
	Ant-TAContig6709	1515	EFN63956	Ants	Camponotus floridanus	Tryptophanyl-tRNA synthetase, mitochondrial
	kmr23_comp59316_c0_seq1	1515	EFN69656	Ants	Camponotus floridanus	UPF0636 protein C4orf41-like protein
	kmr23_comp81896_c0_seq1	1513	EFN68745	Ants	Camponotus floridanus	Chitotriosidase-1
	kmr23_comp34958_c0_seq1	1513	EFN67389	Ants	Camponotus floridanus	Histone-lysine N-methyltransferase MLL5
	kmr29_comp90304_c0_seq5	1513	E9ICW6	Ants	Solenopsis invicta	Putative uncharacterized protein (Fragment)
	Ant-TAContig5520	1510	EFN67704	Ants	Camponotus floridanus	Protein tyrosine phosphatase-like protein ptplad1
	kmr29_comp49976_c0_seq1	1509	EFN69659	Ants	Camponotus floridanus	Protein pelota
	kmr23_comp84109_c0_seq1	1509	EFN61810	Ants	Camponotus floridanus	Protein yellow
	kmr27_comp81503_c0_seq1	1509	EFN74927	Ants	Camponotus floridanus	Serine/threonine-protein phosphatase 2A regulatory subunit B'
	kmr25_comp82132_c0_seq4	1508	E2AJU6	Ants	Camponotus floridanus	Midnolin
	kmr23_comp67717_c4_seq1	1507	EFN67492	Ants	Camponotus floridanus	Phospholipase B1, membrane-associated
	Ant-TAContig6944	1505	EFN65873	Ants	Camponotus floridanus	Beta-1,4-N-acetylgalactosaminyltransferase bre-4
	Ant-TAContig5807	1505	EFN60267	Ants	Camponotus floridanus	Ubiquitin-like protein 7
	Ant-TAContig3465	1504	EFN65745	Ants	Camponotus floridanus	Potassium channel subfamily K member 13
	kmr25_comp74652_c0_seq1	1504	E2AJD0	Ants	Camponotus floridanus	Putative uncharacterized protein
	kmr25_comp68158_c0_seq1	1504	F4WEY1	Ants	Acromyrmex echinatior	Serine/threonine-protein kinase 6
	kmr23_comp55361_c1_seq1	1504	EFN65758	Ants	Camponotus floridanus	UPF0555 protein KIAA0776-like protein
	kmr23_comp72397_c0_seq1	1503	EFN71949	Ants	Camponotus floridanus	Dephospho-CoA kinase domain-containing protein
	kmr25_comp40834_c0_seq1	1502	E2APZ1	Ants	Camponotus floridanus	GTP-binding protein 10-like protein
	Ant-TAContig2377	1502	EFN71778	Ants	Camponotus floridanus	Serine/threonine-protein kinase RIO2
	kmr25_comp78331_c1_seq1	1501	EFN71300	Ants	Camponotus floridanus	Methyltransferase-like protein 2
	Ant-TAContig11800	1501	EFN61011	Ants	Camponotus floridanus	Protein FAM50-like protein
	kmr29_comp88847_c0_seq2	1500	EFN67710	Ants	Camponotus floridanus	Excitatory amino acid transporter 3
	kmr29_comp94232_c2_seq1	1500	EFN64665	Ants	Camponotus floridanus	UPF0474 protein CG13624
	kmr25_comp39428_c0_seq1	1496	E2A0I6	Ants	Camponotus floridanus	Endoplasmic reticulum-Golgi intermediate compartment protein 2
	kmr23_comp74534_c0_seq1	1495	E2A3M0	Ants	Camponotus floridanus	Micrpherule protein 1
	kmr27_comp88745_c0_seq4	1495	EFN72605	Ants	Camponotus floridanus	Proton-coupled amino acid transporter 1
	kmr27_comp86746_c1_seq4	1492	E2AD46	Ants	Camponotus floridanus	Neurotrimin
	kmr23_comp66170_c1_seq1	1492	EFN69286	Ants	Camponotus floridanus	Nicotinamide mononucleotide adenylyltransferase 1
	kmr25_comp41279_c0_seq1	1492	EFN62440	Ants	Camponotus floridanus	Ubiquitin-like modifier-activating enzyme 5
	Ant-TAContig10480	1491	EFN84791	Ants	Harpegnathos saltator	hypothetical protein EAI_00945
	kmr23_comp28930_c0_seq1	1490	EFN61713	Ants	Camponotus floridanus	Carboxypeptidase B
	kmr25_comp67286_c0_seq1	1489	E1ZWN8	Ants	Camponotus floridanus	Suppressor of cytokine signaling 6
	kmr29_comp93361_c0_seq16	1489	EFN74954	Ants	Camponotus floridanus	UDP-xylose and UDP-N-acetylglucosamine transporter-like
	kmr23_comp71292_c0_seq1	1488	EFN67761	Ants	Camponotus floridanus	Transaldolase
	Ant-TAContig7854	1487	EFN76685	Ants	Harpegnathos saltator	LAG1 longevity assurance-like protein 6
	kmr23_comp70138_c73_seq1	1486	EFN74134	Ants	Camponotus floridanus	GTPase-activating Rap/Ran-GAP domain-like protein 3
	kmr23_comp68295_c1_seq1	1486	EFN67881	Ants	Camponotus floridanus	Membrane metallo-endopeptidase-like 1
	kmr23_comp71581_c0_seq1	1485	EFN71591	Ants	Camponotus floridanus	AN1-type zinc finger protein 1
	kmr25_comp80710_c0_seq1	1485	E2A9J4	Ants	Camponotus floridanus	Radial spoke head protein 3-like protein
	kmr23_comp71701_c0_seq1	1483	EFN72604	Ants	Camponotus floridanus	Ubiquitin carboxyl-terminal hydrolase isozyme L3
	kmr23_comp72633_c0_seq1	1482	EFN73239	Ants	Camponotus floridanus	Mediator of RNA polymerase II transcription subunit 19
	kmr23_comp71445_c0_seq1	1482	E2AC05	Ants	Camponotus floridanus	Small ubiquitin-related modifier 3
	kmr29_comp91580_c0_seq4	1481	E2A2T9	Ants	Camponotus floridanus	Alde 1-epimerase
	kmr23_comp71211_c0_seq1	1480	EFN62195	Ants	Camponotus floridanus	L-lactate dehydrogenase
	Ant-TAContig3732	1479	EFN64357	Ants	Camponotus floridanus	Probable ATP-dependent RNA helicase DDX5
	kmr23_comp58852_c0_seq1	1478	E2AED2	Ants	Camponotus floridanus	Putative uncharacterized protein
	kmr25_comp78265_c0_seq2	1477	EFN66673	Ants	Camponotus floridanus	Cell cycle control protein 50A
	kmr23_comp50415_c1_seq1	1477	EFN70717	Ants	Camponotus floridanus	Lutropin-choriogonadotropic hormone receptor
	kmr23_comp56270_c0_seq1	1477	EFN61236	Ants	Camponotus floridanus	Ras-related and estrogen-regulated growth inhibitor
	kmr25_comp41435_c0_seq1	1477	EFN73834	Ants	Camponotus floridanus	Ras-related protein Rab-18
	kmr25_comp61940_c0_seq1	1477	EFN63016	Ants	Camponotus floridanus	Transforming growth factor beta regulator 1
	Ant-TAContig2374	1476	EFN61013	Ants	Camponotus floridanus	G protein pathway suppressor 2
	kmr23_comp33654_c0_seq1	1476	EFN68154	Ants	Camponotus floridanus	WD repeat-containing protein 55
	kmr23_comp72621_c0_seq1	1475	EGI60181	Ants	Acromyrmex echinatior	Something about silencing protein 10
	Ant-TAContig3504	1473	EFN82078	Ants	Harpegnathos saltator	Dual specificity mitogen-activated protein kinase kinase 7
	kmr29_comp96282_c6_seq1	1472	EGI57156	Ants	Acromyrmex echinatior	hypothetical protein G5I_14626
	Ant-TAContig3702	1472	EFN64427	Ants	Camponotus floridanus	Methyl-CpG-binding domain protein 3
	Ant-TAContig1010	1471	EFN70420	Ants	Camponotus floridanus	Hepatic triacylglycerol lipase
	kmr25_comp81805_c0_seq1	1469	EFN67041	Ants	Camponotus floridanus	CUE domain-containing protein 1
	kmr23_comp69376_c1_seq1	1469	EFN73822	Ants	Camponotus floridanus	OTU domain-containing protein 4
	kmr23_comp73683_c0_seq1	1469	EFN62912	Ants	Camponotus floridanus	Proline-rich protein PRCC
	kmr25_comp39286_c0_seq1	1469	E2A1K7	Ants	Camponotus floridanus	Protein SYS1-like protein
	kmr23_comp32898_c0_seq1	1468	EGI67558	Ants	Acromyrmex echinatior	Coiled-coil domain-containing protein 111
	Ant-TAContig1181	1468	EFN66458	Ants	Camponotus floridanus	hypothetical protein EAG_12607
	kmr31_comp3400_c0_seq1	1467	EFN61646	Ants	Camponotus floridanus	Tumor suppressor candidate 3
	kmr23_comp78737_c0_seq1	1466	EFN61037	Ants	Camponotus floridanus	DNA repair protein RAD51-like protein 1
	kmr25_comp77496_c0_seq1	1465	F4WI77	Ants	Acromyrmex echinatior	Apolipoprotein D
	kmr23_comp41034_c0_seq1	1464	EFN60790	Ants	Camponotus floridanus	hypothetical protein EAG_06395
	kmr23_comp71153_c0_seq1	1463	EFN62859	Ants	Camponotus floridanus	Pre-mRNA-splicing factor Syf2
	Ant-TAContig5735	1462	EFN78423	Ants	Harpegnathos saltator	hypothetical protein EAI_13692
	kmr23_comp72151_c0_seq1	1462	EFN68304	Ants	Camponotus floridanus	Solute carrier family 25 member 46
	kmr23_comp60694_c0_seq1	1461	EFN72481	Ants	Camponotus floridanus	2-oxoisovalerate dehydrogenase subunit beta, mitochondrial
	kmr23_comp57169_c1_seq1	1461	EFN65021	Ants	Camponotus floridanus	DNA primase small subunit
	Ant-TAContig623	1461	EFN61998	Ants	Camponotus floridanus	Poly [ADP-ribose] polymerase 16
	kmr23_comp72706_c0_seq1	1460	EFN64928	Ants	Camponotus floridanus	Ras-related GTP-binding protein A
	kmr25_comp87589_c0_seq1	1457	EFN64321	Ants	Camponotus floridanus	Leucine-rich repeat-containing protein C10orf11-like protein
	kmr29_comp96568_c2_seq7	1457	E1ZW45	Ants	Camponotus floridanus	Tafazzin-like protein
	kmr23_comp74623_c0_seq1	1456	EFN63294	Ants	Camponotus floridanus	Protein jagged-1
	kmr23_comp36427_c0_seq1	1455	EFN63879	Ants	Camponotus floridanus	RNA pseudouridylate synthase domain-containing protein 4
	kmr29_comp88732_c1_seq1	1454	EFN84618	Ants	Harpegnathos saltator	CBF1-interacting corepressor
	Ant-TAContig2151	1453	EGI58239	Ants	Acromyrmex echinatior	Acetylcholine receptor subunit alpha-L1
	Ant-TAContig2277	1453	EFN66048	Ants	Camponotus floridanus	hypothetical protein EAG_14546
	kmr23_comp66714_c0_seq1	1452	E9J633	Ants	Solenopsis invicta	Putative uncharacterized protein (Fragment)
	kmr27_comp90077_c0_seq4	1451	EFN64605	Ants	Camponotus floridanus	Netrin receptor UNC5C
	kmr27_comp84957_c0_seq2	1450	EFN63510	Ants	Camponotus floridanus	hypothetical protein EAG_07050
	kmr25_comp83233_c0_seq2	1450	EFN73317	Ants	Camponotus floridanus	hypothetical protein EAG_13088
	kmr23_comp67718_c1_seq1	1450	EFN74356	Ants	Camponotus floridanus	Membrane-bound transcription factor site-2 protease
	kmr25_comp83474_c1_seq3	1450	EFN62475	Ants	Camponotus floridanus	Plasma kallikrein
	kmr23_comp73173_c0_seq1	1447	EFN66080	Ants	Camponotus floridanus	Syntaxin-12
	kmr23_comp70862_c0_seq1	1445	EFN70460	Ants	Camponotus floridanus	Alpha-N-acetylgalactosaminidase
	kmr23_comp74758_c0_seq1	1444	EFN62977	Ants	Camponotus floridanus	Myeloid differentiation primary response protein MyD88
	kmr27_comp88921_c0_seq3	1444	EFN66242	Ants	Camponotus floridanus	Uncharacterized protein C9orf126-like protein
	kmr31_comp2526_c0_seq2	1443	F4X3F3	Ants	Acromyrmex echinatior	Putative uncharacterized protein
	kmr23_comp83712_c0_seq1	1440	EFN63508	Ants	Camponotus floridanus	Low-density lipoprotein receptor-related protein 2
	kmr29_comp92365_c1_seq1	1440	E1ZZK4	Ants	Camponotus floridanus	Pre-mRNA-splicing factor ATP-dependent RNA helicase PRP16
	kmr23_comp71344_c0_seq1	1439	EFN73195	Ants	Camponotus floridanus	Secretory carrier-associated membrane protein 1
	kmr23_comp37653_c0_seq1	1438	EFN71613	Ants	Camponotus floridanus	28S ribosomal protein S28, mitochondrial
	Ant-TAContig5017	1438	EFN82150	Ants	Harpegnathos saltator	hypothetical protein EAI_09546
	kmr23_comp72993_c0_seq1	1437	EFN73072	Ants	Camponotus floridanus	Coiled-coil domain-containing protein 51
	kmr25_comp68623_c0_seq1	1437	EFN66966	Ants	Camponotus floridanus	General transcription factor IIE subunit 1
	kmr23_comp34260_c0_seq1	1436	EFN66912	Ants	Camponotus floridanus	26S proteasome non-ATPase regulatory subunit 12
	kmr23_comp91172_c0_seq1	1436	EFN74799	Ants	Camponotus floridanus	Dynein heavy chain 2, axonemal
	Ant-TAContig4462	1434	EFN61660	Ants	Camponotus floridanus	Integrator complex subunit 12
	kmr23_comp67000_c0_seq1	1433	E2AX77	Ants	Camponotus floridanus	Probable chitinase 1
	kmr23_comp67299_c6_seq1	1432	EFZ12506	Ants	Solenopsis invicta	hypothetical protein SINV_13327
	kmr23_comp40174_c0_seq1	1432	EFN61911	Ants	Camponotus floridanus	Multiple inositol polyphosphate phosphatase 1
	Ant-TAContig6427	1432	EFN74319	Ants	Camponotus floridanus	Protein phosphatase PTC7-like protein
	kmr25_comp75956_c1_seq1	1431	E2B1F0	Ants	Camponotus floridanus	Fer-1-like protein 4
	kmr23_comp71564_c0_seq1	1431	EFN73312	Ants	Camponotus floridanus	hypothetical protein EAG_13083
	kmr23_comp52078_c1_seq1	1431	EFN67211	Ants	Camponotus floridanus	Monocarboxylate transporter 9
[truncated: 1,809 more rows]
